# Supplementary material
Source: publisher figshare collection journal article supplement (https://acs.figshare.com/ndownloader/files/15074483)
Supplement: Supplementary file 1 [file 15074483]

## Supporting Information

### Catalytic Activation of *cis*-Vicinal Diols by Boronic Acids: Site-Selective Acylation of Carbohydrates

Naoyuki Shimada,\* Yuki Nakamura, Takayuki Ochiai, and  
Kazuishi Makino

Laboratory of Organic Chemistry for Drug Development and Medical  
Research Laboratories, Department of Pharmaceutical Sciences,  
Kitasato University, Tokyo 108-8641, Japan

#### Table of Contents

|                                                                                          |      |
|------------------------------------------------------------------------------------------|------|
| 1. General information                                                                   | S2   |
| 2. Supplementary information                                                             | S3   |
| 3. Preparation of boronic acid <b>1c</b> , <b>1d</b> and <b>1e</b>                       | S12  |
| 4. Supplementary data for boronic acids                                                  | S18  |
| 5. Boronic acid catalyzed site-selective benzylation of <b>2a</b><br>(Table 1)           | S21  |
| 6. Gram-scale synthesis (Scheme 1)                                                       | S23  |
| 7. Boronic acid catalyzed site-selective mono-benzylation of<br>carbohydrates (Scheme 2) | S33  |
| 8. Boronic acid catalyzed site-selective mono-acylation of <b>2a</b><br>(Scheme 3)       | S41  |
| 9. Boronic acid catalyzed site-selective dibenzylation<br>(Scheme 4)                     | S58  |
| 10. Control experiments for mechanistic studies (Scheme 5)                               | S60  |
| 11. <sup>1</sup> H, <sup>1</sup> H- <sup>1</sup> H COSY, <sup>13</sup> C NMR spectra     | S63  |
| 12. References                                                                           | S249 |

## 1. General information

NMR spectra were recorded on Agilent Technologies 400-MR DD2 (400 MHz for  $^1\text{H}$ , 100 MHz for  $^{13}\text{C}$ ), 400-MR (400 MHz for  $^1\text{H}$ , 100 MHz for  $^{13}\text{C}$ ), NMR DD2 400NB (128 MHz for  $^{11}\text{B}$ ) spectrometers.  $^1\text{H}$ -NMR data are reported as follows; chemical shift in parts per million (ppm) downfield or upfield from  $\text{CDCl}_3$  ( $\delta$  7.26),  $\text{CD}_3\text{OD}$  ( $\delta$  3.31) integration, multiplicity (br = broad, s = singlet, d = doublet, t = triplet, q = quartet, quin = quintet, sext = sextet, sep = septet, dd = double doublet, ddd = double double doublet, dddd = double double double doublet, ddt = double double triplet, dt = double triplet, dq = double quartet, and m = multiplet), and coupling constants (Hz).  $^{13}\text{C}$ -NMR chemical shifts are reported in ppm downfield or upfield from  $\text{CDCl}_3$  ( $\delta$  77.0) or  $\text{CD}_3\text{OD}$  ( $\delta$  49.0).  $^{11}\text{B}$ -NMR chemical shifts are reported in ppm downfield or upfield from  $\text{PhB}(\text{OH})_2$  ( $\delta$  28.82). Mass spectra were measured with JEOL JMS-AX505HA, JMS-700 MStation, and JEOL JMS-T100LP spectrometers. Melting points (mp) were obtained on Stanford Research Systems *MPA100* melting point apparatus. Thin-layer chromatography (TLC) was carried out on Merck 60F-254 or Fuji NH KP20610 (NH) precoated silica gel plates and were visualized by fluorescence quenching under UV light. Column chromatography was performed using Silica Gel 60N (spherical, neutral, 63-210  $\mu\text{m}$ ) (Kanto Chemical Co., Inc.) and Silica Gel NH (Fuji Silysia Chemical LTD, HU50100, DM1020). Air- and/or moisture-sensitive reactions were carried out under argon or nitrogen atmosphere using oven-dried glassware. Boronic acid **1a**<sup>1</sup> and **1b**<sup>2</sup>, borinic acid **SI-2**<sup>3</sup> and **SI-3**<sup>3</sup> were synthesized according to the literature.

## 2. Supplementary information

SI-Table 1. Initial solvent screening for site-selective benzylation of **2a**.

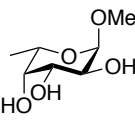

**2a**

**1c** (5.0 mol%)  
BzCl (1.5 equiv)  
*i*Pr<sub>2</sub>NEt (1.5 equiv)

solvent (0.2 M)  
rt, 4 h



**3a**



**1c**

| entry | solvent                         | yield (%) <sup>a</sup> |
|-------|---------------------------------|------------------------|
| 1     | CH <sub>2</sub> Cl <sub>2</sub> | >99                    |
| 2     | DCE                             | 91                     |
| 3     | CH <sub>3</sub> CN              | 96                     |
| 4     | THF                             | 89                     |
| 5     | 1,4-dioxane                     | 78                     |
| 6     | toluene                         | 55                     |
| 7     | EtOAc                           | 49                     |
| 8     | acetone                         | 46                     |
| 9     | DMF                             | 3                      |

<sup>a</sup>Determined by <sup>1</sup>H-NMR of crude mixture.

SI-Table 2. Optimization of base for site-selective benzylation of **2a**.

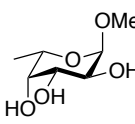

**2a**

**1c** (5.0 mol%)  
BzCl (1.5 equiv)  
base (1.5 equiv)

CH<sub>2</sub>Cl<sub>2</sub> (0.2 M)  
rt, 4 h



**3a**

+



**4**

+



**5**

| entry | base                         | yield ( <b>3a</b> / <b>4</b> / <b>5</b> ) (%) <sup>a</sup> | total (%) <sup>a</sup> |
|-------|------------------------------|------------------------------------------------------------|------------------------|
| 1     | <i>i</i> Pr <sub>2</sub> NEt | >99 / – / –                                                | >99                    |
| 2     | DABCO                        | 44 / 9 / 7                                                 | 60                     |
| 3     | NEt <sub>3</sub>             | 38 / 23 / 24                                               | 85                     |
| 4     | 2,6-lutidine                 | 94 / 1 / 2                                                 | 97                     |
| 5     | 2,4,6-collidine              | 94 / 2 / 2                                                 | 98                     |
| 6     | pyridine                     | 46 / 16 / 15                                               | 77                     |
| 7     | imidazole                    | 15 / 12 / 24                                               | 51                     |
| 8     | 1-methylimidazole            | 17 / 25 / 51                                               | 93                     |
| 9     | 1,2-dimethylimidazole        | 16 / 41 / 24                                               | 81                     |

<sup>a</sup>Determined by <sup>1</sup>H-NMR of crude mixture.

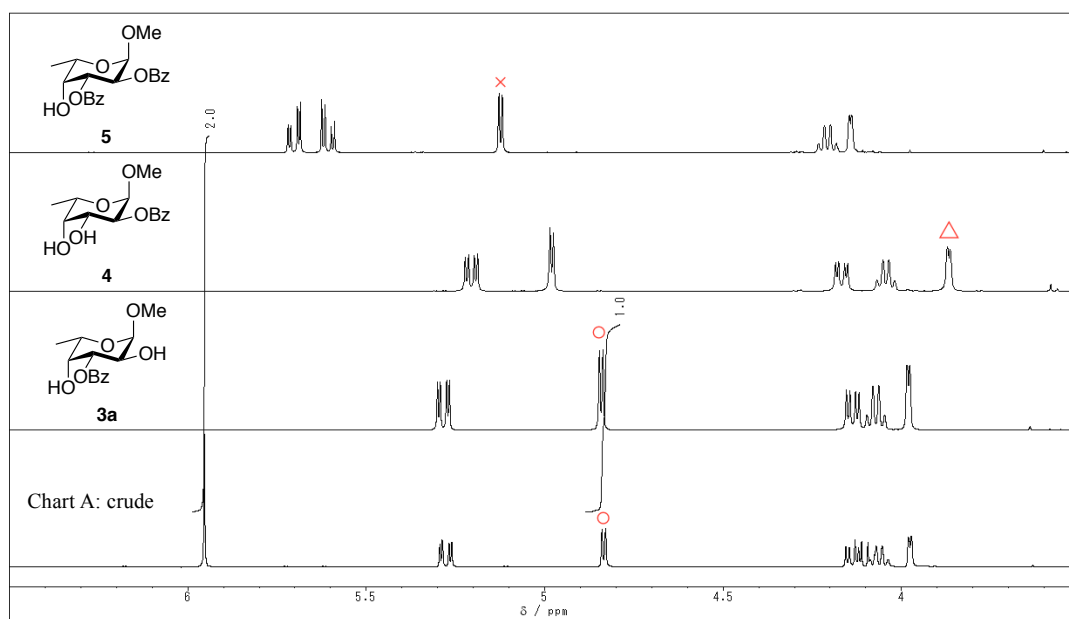

**SI-Figure 1.** Chart A:  $^1\text{H}$ -NMR spectrum of crude reaction mixture for site-selective benzylation of **2a** by using *N,N*-diisopropylethylamine as base (SI-Table 2, entry 1).

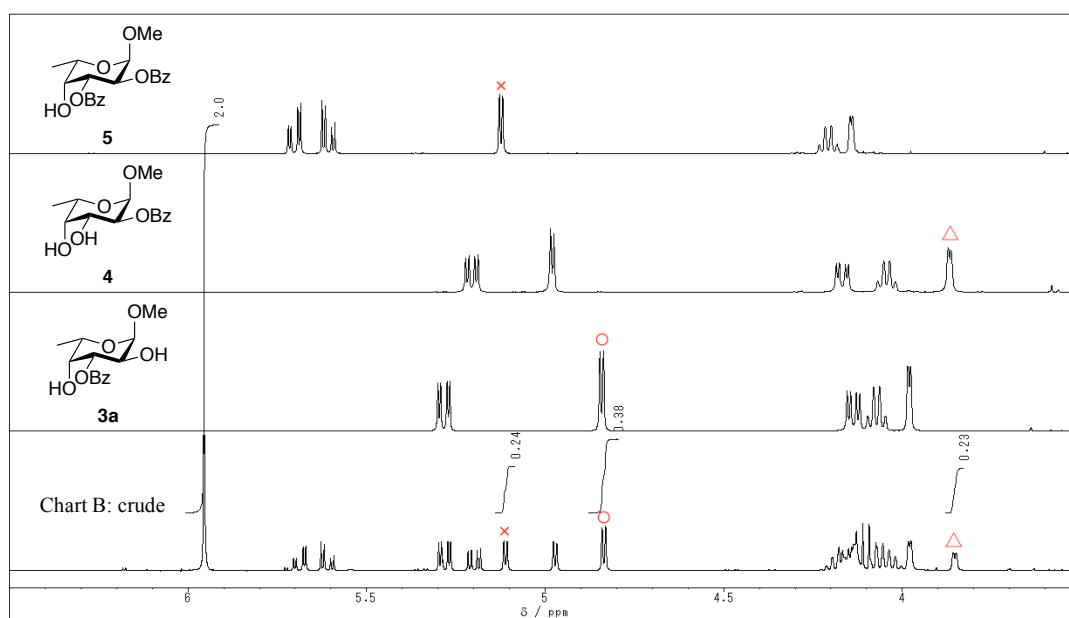

**SI-Figure 2.** Chart B:  $^1\text{H}$ -NMR spectrum of crude reaction mixture for site-selective benzylation of **2a** by using triethylamine as base (SI-Table 2, entry 3).



**SI-Table 3. Optimization of reaction conditions for site-selective benzylation of 2a.**

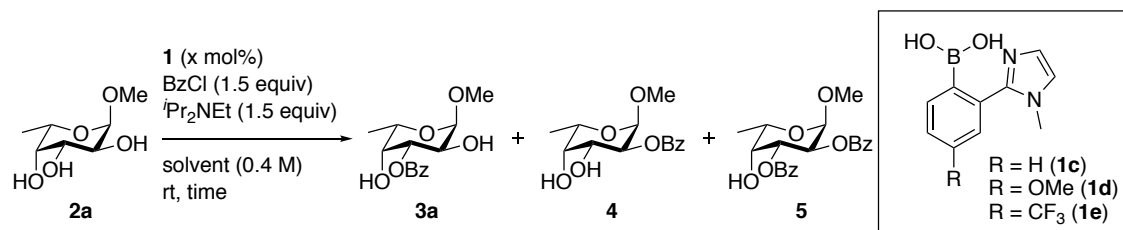

| entry | cat (x mol%)    | solvent                         | time (h) | yield ( <b>3a</b> / <b>4</b> / <b>5</b> ) (%) <sup>a</sup> | total (%) <sup>a</sup> |
|-------|-----------------|---------------------------------|----------|------------------------------------------------------------|------------------------|
| 1     | <b>1c</b> (1)   | CH <sub>2</sub> Cl <sub>2</sub> | 4        | 92 / 5 / 1                                                 | 98                     |
| 2     | <b>1c</b> (0.5) | CH <sub>2</sub> Cl <sub>2</sub> | 4        | 84 / 3 / 7                                                 | 94                     |
| 3     | <b>1c</b> (0.5) | 1,4-dioxane                     | 17.5     | 99 / – / <1                                                | 99                     |
| 4     | <b>1d</b> (0.5) | 1,4-dioxane                     | 4        | >99 / <1 / –                                               | >99                    |
| 5     | <b>1e</b> (0.5) | 1,4-dioxane                     | 24       | 93 / <1 / <1                                               | 93                     |

<sup>a</sup>Determined by <sup>1</sup>H-NMR of crude mixture.

**SI-Table 4. Comparison of catalysts for site-selective benzylation of 2a.**

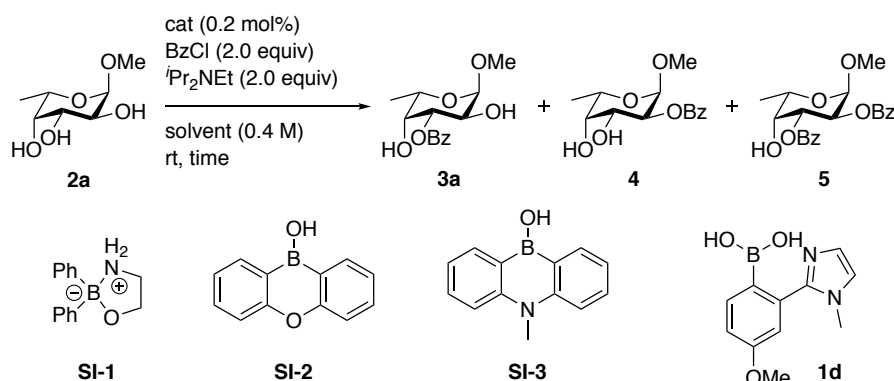

| entry | cat         | solvent     | time (h) | yield ( <b>3a</b> / <b>4</b> / <b>5</b> ) (%) <sup>a</sup> | total (%)             |
|-------|-------------|-------------|----------|------------------------------------------------------------|-----------------------|
| 1     | <b>SI-1</b> | 1,4-dioxane | 24       | 24 / 4 / 1                                                 | 29                    |
| 2     | <b>SI-2</b> | 1,4-dioxane | 24       | 23 / 6 / 2                                                 | 31                    |
| 3     | <b>SI-3</b> | 1,4-dioxane | 24       | 21 / 4 / 2                                                 | 27                    |
| 4     | <b>1d</b>   | 1,4-dioxane | 7        | >99 / – / <1                                               | >99 [99] <sup>b</sup> |
| 5     | none        | 1,4-dioxane | 7        | 1 / 1 / –                                                  | 2                     |
| 6     | <b>SI-1</b> | MeCN        | 7        | 35 / 3 / 4                                                 | 42                    |
| 7     | <b>SI-1</b> | MeCN        | 24       | 43 / 5 / 4                                                 | 52                    |
| 8     | <b>SI-2</b> | MeCN        | 7        | 66 / 3 / 3                                                 | 72                    |
| 9     | <b>SI-3</b> | MeCN        | 7        | 46 / 5 / 5                                                 | 56                    |

<sup>a</sup>Determined by <sup>1</sup>H-NMR of crude mixture. <sup>b</sup>Isolated yield of **3a**.

**SI-Table 5. Solvent screening for site-selective benzylation of 2g.**

| entry | solvent                         | time (h) | yield ( <b>3g</b> / <b>SI-4</b> ) (%) <sup>a</sup> | <b>3g</b> : <b>SI-4</b> | total (%) <sup>a</sup> |
|-------|---------------------------------|----------|----------------------------------------------------|-------------------------|------------------------|
| 1     | CH <sub>2</sub> Cl <sub>2</sub> | 22       | 73 / 8                                             | 9.1 : 1                 | 81                     |
| 2     | THF                             | 4        | 72 / 14                                            | 5.1 : 1                 | 86                     |
| 3     | 1,4-dioxane                     | 4        | 83 / 1                                             | >30 : 1                 | 84                     |

<sup>a</sup>Determined by <sup>1</sup>H-NMR of crude mixture.

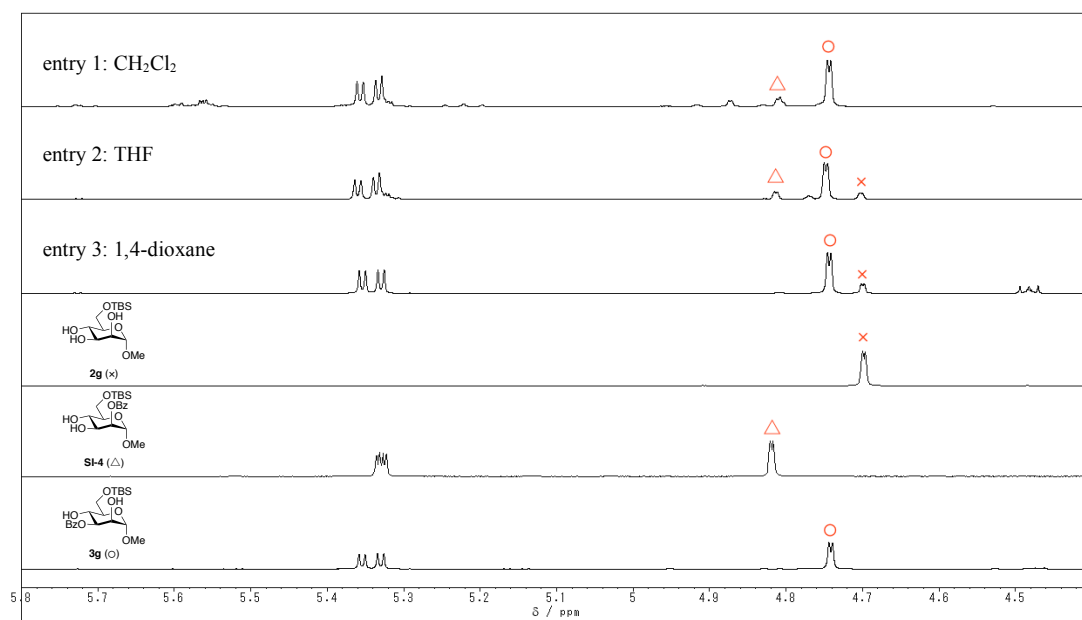

**SI-Figure 3. <sup>1</sup>H-NMR spectra of crude reaction mixtures for SI-Table 5.**

**SI-Table 6. Optimization of catalyst for site-selective benzoylation of 2g.**

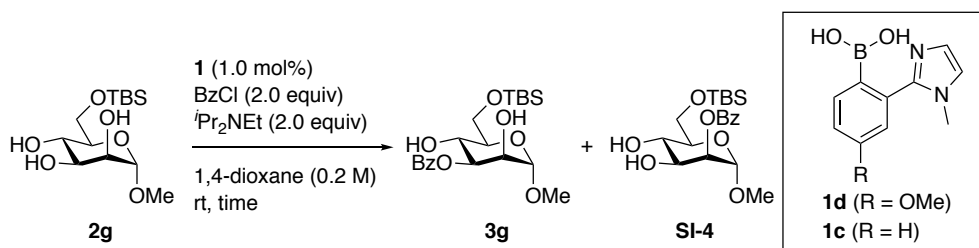

| entry | 1                   | time | yield ( <b>3g</b> / <b>SI-4</b> ) (%) <sup>a</sup> | <b>3g</b> : <b>SI-4</b> <sup>a</sup> | total (%) <sup>a</sup> |
|-------|---------------------|------|----------------------------------------------------|--------------------------------------|------------------------|
| 1     | <b>1d</b> (R = OMe) | 2    | 69 / 31                                            | 2.2 : 1                              | 100                    |
| 2     | <b>1c</b> (R = H)   | 24   | 98 / 2                                             | >30 : 1                              | 100 [97] <sup>b</sup>  |

<sup>a</sup>Determined by <sup>1</sup>H-NMR of crude mixture. <sup>b</sup>Isolated yield of **3g**.

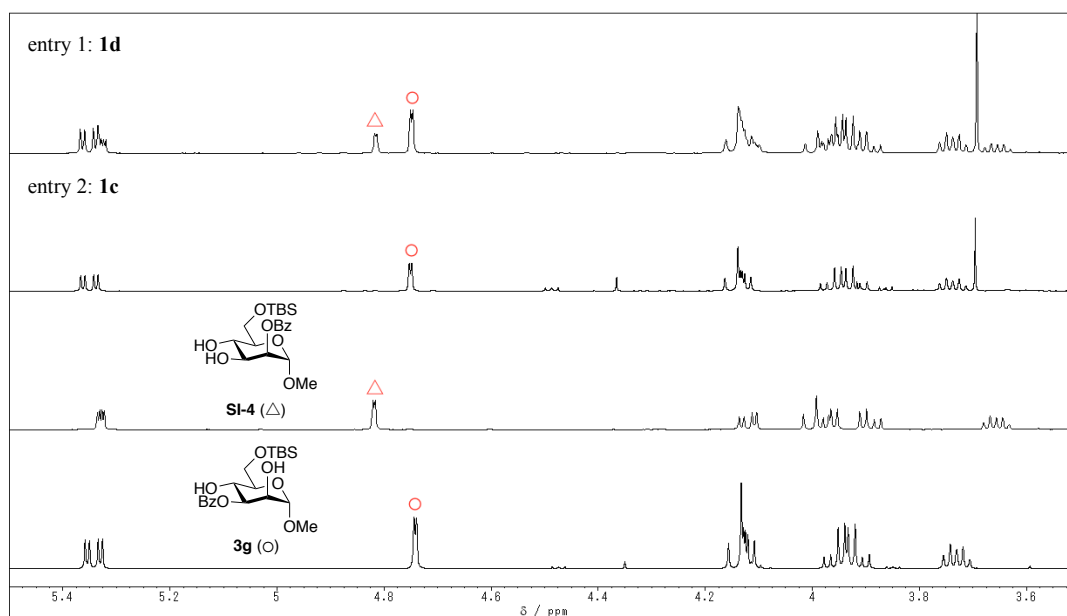

**SI-Figure 4. <sup>1</sup>H-NMR spectra of crude reaction mixtures for SI-Table 6.**

**SI-Table 7. Solvent screening for site-selective benzylation of 2h.**

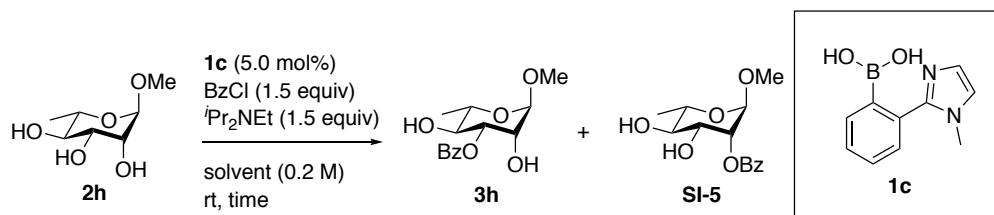

| entry | solvent                         | 1c | time (h) | yield ( 3h / SI-5 ) (%) <sup>a</sup> | 3h : SI-5 | total (%) <sup>a</sup> |
|-------|---------------------------------|----|----------|--------------------------------------|-----------|------------------------|
| 1     | CH <sub>2</sub> Cl <sub>2</sub> | +  | 4        | 54 / 14                              | 3.9 : 1   | 68                     |
| 2     | DCE                             | +  | 4        | 72 / 13                              | 5.5 : 1   | 85                     |
| 3     | CH <sub>3</sub> CN              | +  | 4        | 66 / 12                              | 5.5 : 1   | 78                     |
| 4     | toluene                         | +  | 4        | 62 / 15                              | 4.1 : 1   | 77                     |
| 5     | THF                             | +  | 4        | 74 / 25                              | 3.0 : 1   | 99                     |
| 6     | 1,4-dioxane                     | +  | 4        | 84 / 1                               | >30 : 1   | 85                     |
| 7     | 1,4-dioxane                     | –  | 24       | 2 / 1                                | 2 : 1     | 3                      |

<sup>a</sup>Determined by <sup>1</sup>H-NMR of crude mixture.

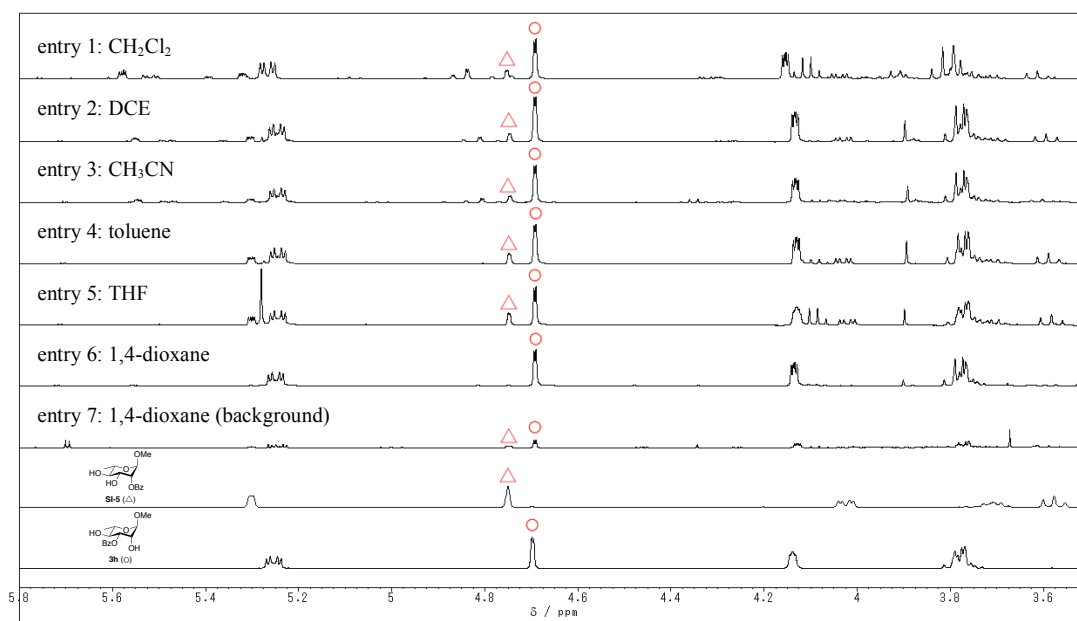

**SI-Figure 5. <sup>1</sup>H-NMR spectra of crude reaction mixtures for SI-Table 7.**

**SI-Table 8. Optimization of catalyst for site-selective benzoylation of 2h.**

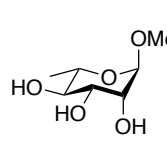

**2h**

**1** (1.0 mol%)  
BzCl (2.0 equiv)  
<sup>t</sup>Pr<sub>2</sub>NEt (2.0 equiv)  
1,4-dioxane (0.2 M)  
rt, time



**3h**

+



**SI-5**



**1d** (R = OMe)  
**1c** (R = H)

| entry | <b>1</b>            | time (h) | yield ( <b>3h</b> / <b>SI-5</b> ) (%) <sup>a</sup> | <b>3h</b> : <b>SI-5</b> | total (%) <sup>a</sup> |
|-------|---------------------|----------|----------------------------------------------------|-------------------------|------------------------|
| 1     | <b>1d</b> (R = OMe) | 2        | 63 / 37                                            | 1.7 : 1                 | 100                    |
| 2     | <b>1c</b> (R = H)   | 12       | 98 / 2                                             | >30 : 1                 | 100 [97] <sup>b</sup>  |

<sup>a</sup>Determined by <sup>1</sup>H-NMR of crude mixture. <sup>b</sup>Isolated yield of **3h**.

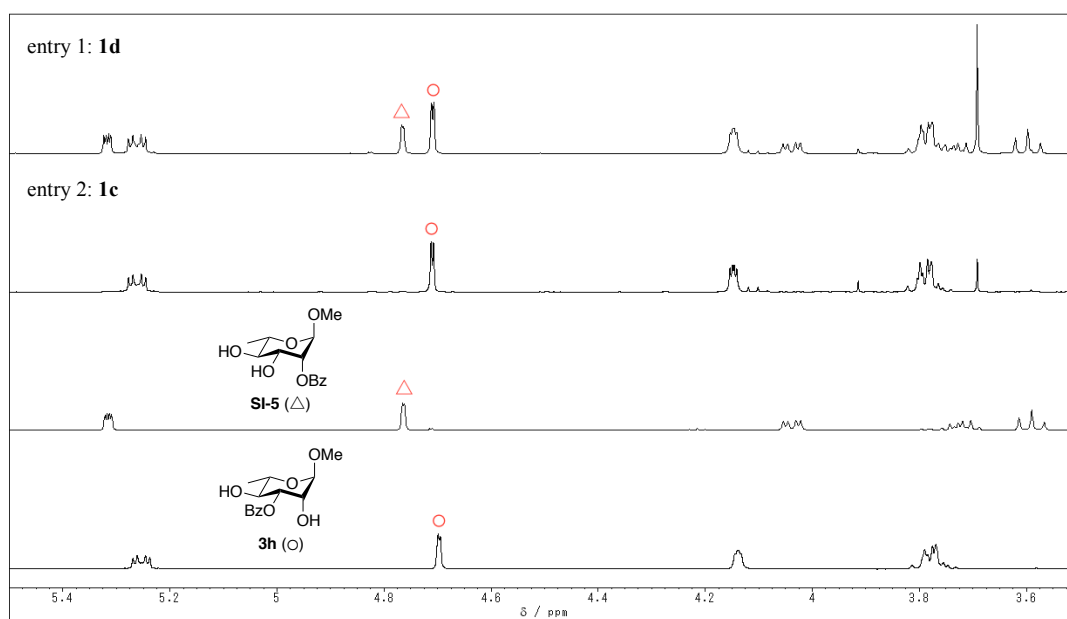

**SI-Figure 6. <sup>1</sup>H-NMR spectra of crude reaction mixtures for SI-Table 8.**

**SI-Table 9. Optimization of catalyst for site-selective benzoylation of **2i**.**

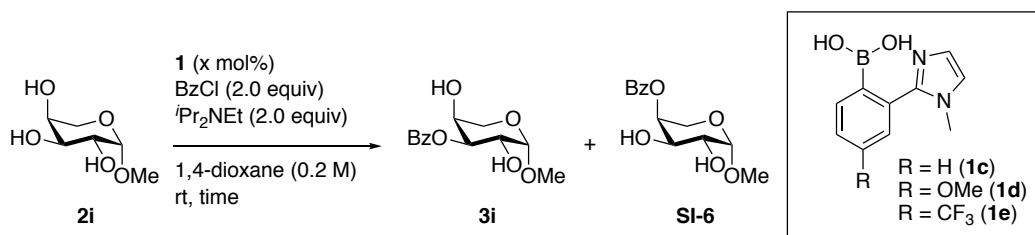

| entry | <b>1</b> (x mol%) | time (h) | yield ( <b>3i</b> / <b>SI-6</b> ) (%) <sup>a</sup> | <b>3i</b> : <b>SI-6</b> | total yield (%) <sup>a</sup> |
|-------|-------------------|----------|----------------------------------------------------|-------------------------|------------------------------|
| 1     | <b>1d</b> (0.5)   | 2        | 53 / 45                                            | 1.2 : 1                 | 98                           |
| 2     | <b>1d</b> (1.0)   | 2        | 60 / 40                                            | 1.5 : 1                 | 100                          |
| 3     | <b>1c</b> (1.0)   | 15       | 73 / 23                                            | 3.2 : 1                 | 96                           |
| 4     | <b>1e</b> (1.0)   | 24       | 43 / 1                                             | >30 : 1                 | 44                           |
| 5     | <b>1e</b> (2.0)   | 24       | 94 / 6                                             | 16 : 1                  | 100 [93] <sup>b</sup>        |

<sup>a</sup>Determined by <sup>1</sup>H-NMR of crude mixture. <sup>b</sup>Isolated yield of **3i**.

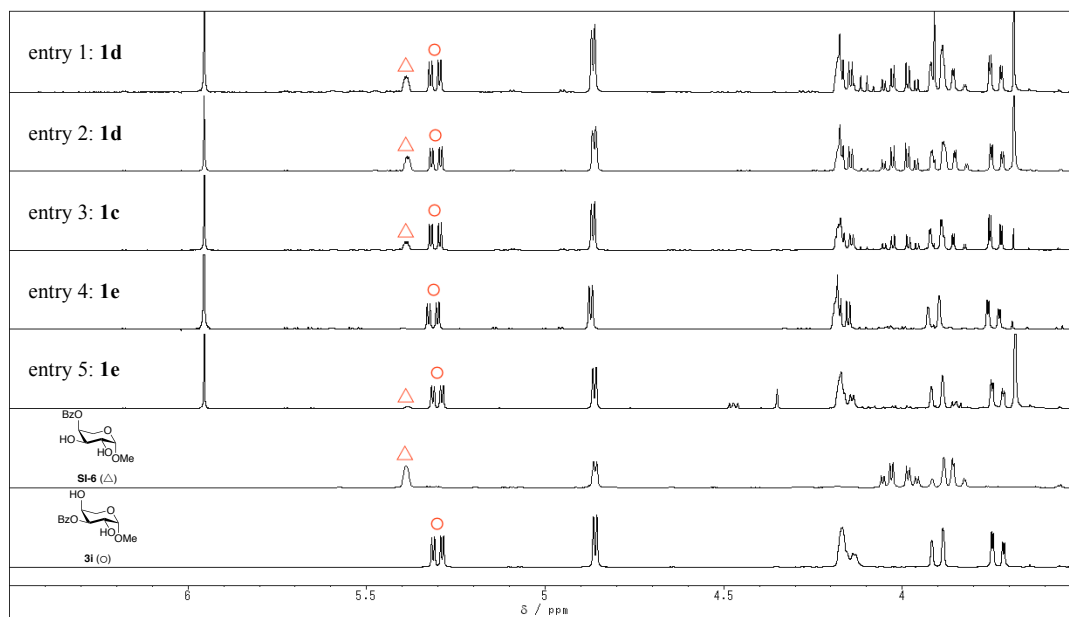

**SI-Figure 7. <sup>1</sup>H-NMR spectra of crude reaction mixtures for SI-Table 9.**

**SI-Table 10. Optimization of base for site-selective acetylation of 2a.**

**2a** → **3s** + **SI-7** + **SI-8**

**1d**

| entry | 1d | base                         | yield ( <b>3s</b> / <b>SI-7</b> / <b>SI-8</b> ) (%) <sup>a</sup> | <b>3s</b> : <b>SI-7</b> | total (%) <sup>a</sup> |
|-------|----|------------------------------|------------------------------------------------------------------|-------------------------|------------------------|
| 1     | +  | <i>i</i> Pr <sub>2</sub> NEt | 78 / 11 / 7                                                      | 7.1 : 1                 | 96                     |
| 2     | –  | <i>i</i> Pr <sub>2</sub> NEt | 32 / 20 / 3                                                      | 1.6 : 1                 | 55                     |
| 3     | +  | collidine                    | 90 / <1 / 9                                                      | >90 : 1                 | 99 [90] <sup>b</sup>   |
| 4     | –  | collidine                    | 24 / 32 / 9                                                      | 1 : 1.7                 | 65                     |

<sup>a</sup>Determined by <sup>1</sup>H-NMR of crude mixture. <sup>b</sup>Isolated yield of **3s**.

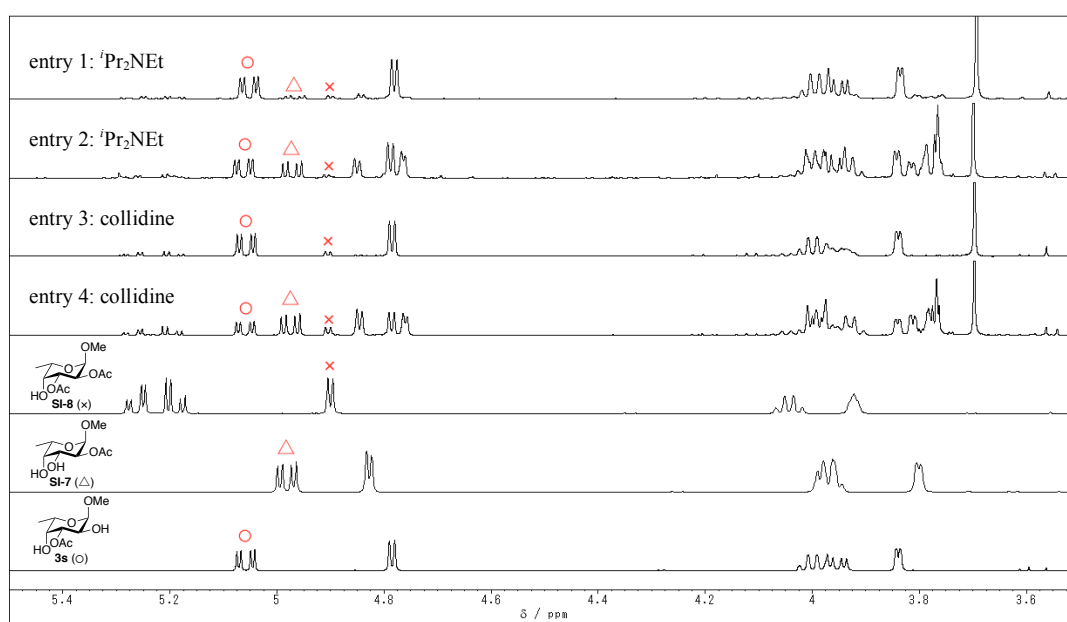

**SI-Figure 8. <sup>1</sup>H-NMR spectra of crude reaction mixtures for SI-Table 10.**

### 3. Preparation of boronic acid **1c**, **1d** and **1e**

#### Preparation of (2-(1-Methyl-1*H*-imidazol-2-yl)phenyl)boronic acid (**1c**)<sup>4</sup>

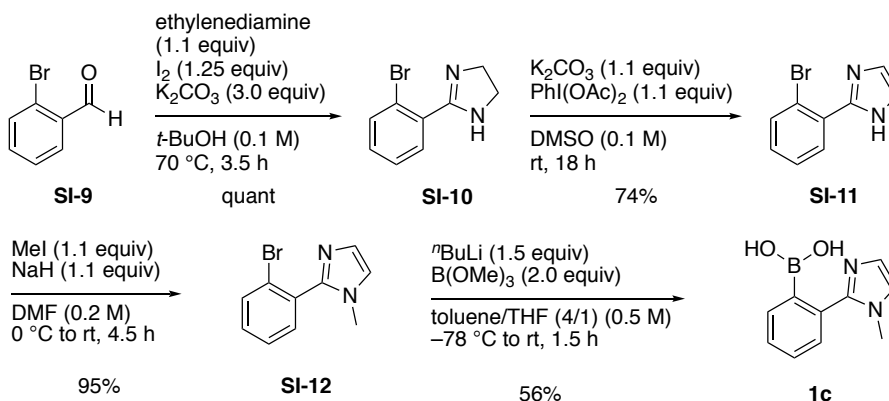

Ethylenediamine (2.01 mL, 29.7 mmol, 1.1 equiv) was added to a stirred solution of 2-bromobenzaldehyde (**SI-9**) (5.00 g, 27.0 mmol, 1.0 equiv) in *t*-BuOH (270 mL, 0.1 M). After stirring at room temperature for 30 minutes under nitrogen,  $I_2$  (8.57 g, 33.8 mmol, 1.25 equiv)<sup>5</sup> and  $K_2CO_3$  (11.2 g, 81.0 mmol, 3.0 equiv) were added. After stirring at 70 °C for 3 hours, the reaction was quenched by addition of sat.  $Na_2SO_3$  aq. and the resulting mixture was extracted three times with chloroform. The combined organic layers were washed with sat.  $NaHCO_3$  aq. and brine, dried over  $Na_2SO_4$ , filtered, and concentrated *in vacuo* to give crude imidazoline **SI-10** (7.01 g). The resulting crude material was used in the next step without further purification.

$PhI(OAc)_2$  (4.88 g, 15.1 mmol, 1.1 equiv)<sup>5</sup> was added to a stirred solution of the crude imidazoline **SI-10** (3.10 g, 13.8 mmol, 1.0 equiv) and  $K_2CO_3$  (2.08 g, 15.1 mmol, 1.1 equiv) in DMSO (138 mL, 0.1 M). After stirring at room temperature for 18 hours, the reaction was quenched by addition of sat.  $NaHCO_3$  aq. and the resulting mixture was extracted three times with ethyl acetate. The combined organic layers were washed with water and brine, dried over  $Na_2SO_4$ , filtered, and concentrated *in vacuo*. The resulting crude material was purified by recrystallization from chloroform to give **SI-11** (2.27 g, 10.2 mmol, 74%) as a white solid.

Data for **SI-11**:  $R_f$  = 0.40 (20/1  $CHCl_3$  / MeOH); mp 142-145 °C;  $^1H$  NMR (400 MHz,  $CDCl_3$ )  $\delta$  8.18 (dd,  $J$  = 8.0, 1.6 Hz, 1H) 7.62 (dd,  $J$  = 8.0, 1.2 Hz, 1H), 7.39 (dt,  $J$  = 8.0, 1.2 Hz, 1H), 7.23–7.18 (m, 3H);  $^{13}C$  NMR (100 MHz,  $CDCl_3$ )  $\delta$  144.6, 133.7, 131.5, 130.5, 129.8, 127.9, 119.2; IR (KBr)  $\nu$  = 3140, 3019, 2965, 2897, 2801, 1560, 1489, 1446, 1408, 1360, 1171, 1103, 1026, 959, 767, 731, 645  $cm^{-1}$ ; HRMS (ESI)  $m/z$  calcd for  $C_9H_8^{79}BrN_2$   $[M+H]^+$  222.9871, found 222.9867.



A solution of imidazole **SI-11** (2.00 g, 8.96 mmol, 1.0 equiv) in DMF (22 mL, 0.4 M) was added to a stirred suspension of NaH (237 mg, 9.86 mmol, 1.1 equiv) in DMF (22 mL, 0.4 M). After stirring at 0 °C for 30 minutes, iodomethane (0.61 mL, 9.86 mmol, 1.1 equiv) was added. After stirring at room temperature for 4 hours, the resulting mixture was poured onto ice and extracted three times with ethyl acetate. The combined organic layers were washed with water and brine, dried over Na<sub>2</sub>SO<sub>4</sub>, filtered, and concentrated *in vacuo*. The resulting crude material was purified by silica gel chromatography (CHCl<sub>3</sub> : methanol = 20 : 1) to give **SI-12** (2.03 g, 8.56 mmol, 95%) as a pale yellow oil.

Data for **SI-12**: *R*<sub>f</sub> = 0.40 (20/1 CHCl<sub>3</sub> / MeOH); <sup>1</sup>H NMR (400 MHz, CD<sub>3</sub>OD) δ 7.66 (br d, *J* = 8.0 Hz, 1H), 7.44 (dd, *J* = 7.6, 2.0 Hz, 1H), 7.40 (br t, *J* = 7.6 Hz, 1H), 7.31 (dt, *J* = 8.0, 2.0 Hz, 1H), 7.15 (d, *J* = 1.2 Hz, 1H), 7.00 (d, *J* = 1.2 Hz, 1H), 3.52 (s, 3H); <sup>13</sup>C NMR (100 MHz, CDCl<sub>3</sub>) δ 146.7, 132.6, 132.4, 132.3, 130.8, 128.2, 127.3, 124.4, 120.9, 33.4; IR (neat) ν = 3383, 3106, 3057, 2948, 1659, 1596, 1562, 1496, 1464, 1436, 1403, 1281, 1136, 1029, 1016, 765, 733, 644 cm<sup>-1</sup>; HRMS (ESI) *m/z* calcd for C<sub>10</sub>H<sub>10</sub><sup>79</sup>BrN<sub>2</sub> [M+H]<sup>+</sup> 237.0027, found 237.0022.

*n*-BuLi in *n*-hexane (1.60 M, 3.96 mL, 6.33 mmol, 1.5 equiv) was added to a stirred solution of **SI-12** (1.00 g, 4.22 mmol, 1.0 equiv) in dry toluene/THF (4 / 1, 8.4 mL, 0.5 M) at -78 °C under argon. After stirring at -78 °C for 30 minutes, B(OMe)<sub>3</sub> (0.941 mL, 8.44 mmol, 2.0 equiv) was added at -78 °C, and then the resulting mixture was warmed to room temperature. After stirring for 1 hour, the mixture was concentrated. The resulting crude material was purified by amino silica gel chromatography (dichloromethane to dichloromethane : methanol = 50 : 1) to give **1c** (477 mg, 2.36 mmol, 56%) as a white solid.

Data for **1c**: *R*<sub>f</sub> (NH) = 0.20 (20/1 CH<sub>2</sub>Cl<sub>2</sub> / MeOH); 125 °C (decomp.); <sup>1</sup>H NMR (400 MHz, CD<sub>3</sub>OD) δ 7.74 (br d, *J* = 7.6 Hz, 1H), 7.55 (br d, *J* = 7.6 Hz, 1H), 7.39 (dt, *J* = 7.6, 1.6 Hz, 1H), 7.35 (dt, *J* = 7.6, 1.6 Hz, 1H), 7.27 (d, *J* = 1.6 Hz, 1H), 7.20 (d, *J* = 1.6 Hz, 1H), 4.06 (s, 3H); <sup>13</sup>C NMR (100 MHz, CD<sub>3</sub>OD) δ 134.6, 133.6, 132.8, 130.5, 127.0, 121.9, 121.7, 35.3; IR (KBr) ν = 3372, 3114, 3093, 3049, 2929, 2888, 2818, 1564, 1510, 1463, 1432, 1360, 1295, 1278, 1210, 1166, 1118, 997, 954, 801, 738, 718, 648 cm<sup>-1</sup>; HRMS (ESI) *m/z* calcd for C<sub>10</sub>H<sub>12</sub><sup>11</sup>BN<sub>2</sub>O<sub>2</sub> [M+H]<sup>+</sup> 203.0992, found 203.0986.

## Preparation of (4-Methoxy-2-(1-methyl-1*H*-imidazol-2-yl)phenyl)boronic acid (**1d**)

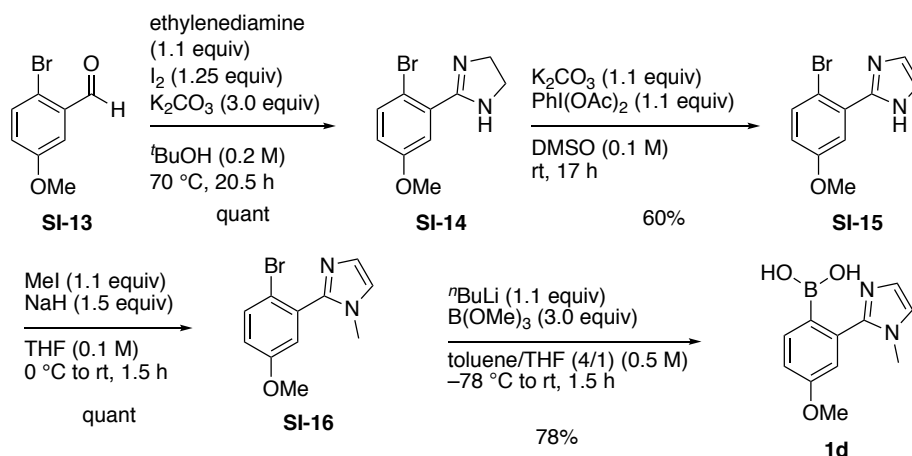

Ethylenediamine (1.37 mL, 20.4 mmol, 1.1 equiv) was added to a stirred solution of 2-bromo-5-methoxybenzaldehyde (**SI-13**) (3.98 g, 18.5 mmol, 1.0 equiv) in *t*-BuOH (93 mL, 0.2 M). After stirring at room temperature for 30 minutes under nitrogen, I<sub>2</sub> (5.87 g, 23.1 mmol, 1.25 equiv)<sup>5</sup> and K<sub>2</sub>CO<sub>3</sub> (7.66 g, 55.5 mmol, 3.0 equiv) were added. After stirring at 70 °C for 20 hours, the reaction was quenched by addition of sat. Na<sub>2</sub>SO<sub>3</sub> aq. and the resulting mixture was extracted three times with chloroform. The combined organic layers were washed with sat. NaHCO<sub>3</sub> aq. and brine, dried over Na<sub>2</sub>SO<sub>4</sub>, filtered, and concentrated *in vacuo* to give crude imidazoline **SI-14** (4.73 g). The resulting crude material was used in the next step without further purification.

PhI(OAc)<sub>2</sub> (4.03 g, 12.5 mmol, 1.1 equiv)<sup>5</sup> was added to a stirred solution of imidazoline **SI-14** (2.90 g, 11.8 mmol, 1.0 equiv) and K<sub>2</sub>CO<sub>3</sub> (1.73 g, 12.5 mmol, 1.1 equiv) in DMSO (114 mL, 0.1 M). After stirring at room temperature for 17 hours, the reaction was quenched by addition of sat. NaHCO<sub>3</sub> aq. and the resulting mixture was extracted three times with ethyl acetate. The combined organic layers were washed with water and brine, dried over Na<sub>2</sub>SO<sub>4</sub>, filtered, and concentrated *in vacuo*. The resulting crude material was purified by recrystallization from chloroform to give **SI-15** (1.73 g, 6.84 mmol, 60%) as a white solid.

Data for **SI-15**: R<sub>f</sub> = 0.10 (2/1 *n*-hexane / EtOAc); mp 162-165 °C; <sup>1</sup>H NMR (400 MHz, CDCl<sub>3</sub>) δ 7.79 (d, *J* = 3.2 Hz, 1H), 7.48 (d, *J* = 8.8 Hz, 1H), 7.22 (s, 2H), 6.79 (dd, *J* = 8.8, 3.2 Hz, 1H), 3.86 (s, 3H); <sup>13</sup>C NMR (100 MHz, CD<sub>3</sub>OD) δ 160.5, 146.4, 135.3, 134.0, 117.84, 117.80, 112.9, 56.1; IR (KBr) ν = 3011, 2962, 1593, 1557, 1487, 1465, 1105, 1017, 861, 809, 766, 628 cm<sup>-1</sup>; HRMS (ESI) *m/z* calcd for C<sub>10</sub>H<sub>10</sub><sup>79</sup>BrN<sub>2</sub>O [M+H]<sup>+</sup> 252.9977, Found 252.9979.

A solution of imidazole **SI-15** (100 mg, 0.395 mmol, 1.0 equiv) in THF (2 mL, 0.2 M) was added to a stirred suspension of NaH (14.2 mg, 0.593 mmol, 1.5 equiv) in THF (2.0 mL, 0.2 M). After stirring at 0 °C for 30 minutes, iodomethane (27.1  $\mu$ L, 0.435 mmol, 1.1 equiv) was added. After stirring at room temperature for 1 hour, the resulting mixture was poured onto ice and extracted three times with ethyl acetate. The combined organic layers were washed with water and brine, dried over Na<sub>2</sub>SO<sub>4</sub>, filtered, and concentrated *in vacuo*. The resulting crude material was purified by silica gel chromatography (hexane : ethyl acetate = 1 : 2) to give **SI-16** (107 mg, 0.401 mmol, >99%) as a pale yellow oil.

Data for **SI-16**:  $R_f$  = 0.20 (1/2 *n*-hexane / EtOAc); <sup>1</sup>H NMR (400 MHz, CDCl<sub>3</sub>)  $\delta$  7.52 (d,  $J$  = 8.8 Hz, 1H), 7.14 (d,  $J$  = 1.2 Hz, 1H), 6.99 (d,  $J$  = 1.2 Hz, 1H), 6.98 (d,  $J$  = 3.2 Hz, 1H), 6.89 (dd,  $J$  = 8.8, 3.2 Hz, 1H), 3.80 (s, 3H), 3.54 (s, 3H); <sup>13</sup>C NMR (100 MHz, CDCl<sub>3</sub>)  $\delta$  158.7, 146.7, 133.2, 133.0, 128.2, 120.9, 117.4, 117.2, 114.6, 55.5, 33.4; IR (neat)  $\nu$  = 3344, 2951, 1598, 1572, 1460, 1434, 1285, 1238, 1209, 1178, 1091, 1208, 728 cm<sup>-1</sup>; HRMS (ESI)  $m/z$  calcd for C<sub>11</sub>H<sub>12</sub><sup>79</sup>BrN<sub>2</sub>O [M+H]<sup>+</sup> 267.0133, Found 267.0123.

*n*-BuLi in *n*-hexane (1.60 M, 257  $\mu$ L, 0.411 mmol, 1.1 equiv) was added to a stirred solution of **SI-16** (100 mg, 0.374 mmol, 1.0 equiv) in dry toluene/THF (4 / 1, 0.75 mL, 0.5 M) at -78 °C under argon. After stirring at -78 °C for 30 minutes, B(OMe)<sub>3</sub> (125  $\mu$ L, 1.12 mmol, 3.0 equiv) was added at -78 °C, and then the resulting mixture was warmed to room temperature. After stirring for 1 hour, the mixture was concentrated. The resulting crude material was purified by amino silica gel chromatography (dichloromethane to dichloromethane : methanol = 50 : 1) to give **1d** (67.3 mg, 0.290 mmol, 78%) as a pale yellow solid.

Data for **1d**:  $R_f$  (NH) = 0.37 (20/1 CH<sub>2</sub>Cl<sub>2</sub> / MeOH); 144 °C (decomp.); <sup>1</sup>H NMR (400 MHz, CD<sub>3</sub>OD)  $\delta$  7.44 (d,  $J$  = 8.0 Hz, 1H), 7.28 (d,  $J$  = 2.0 Hz, 1H), 7.27 (d,  $J$  = 1.7 Hz, 1H), 7.19 (d,  $J$  = 1.7 Hz, 1H), 6.98 (dd,  $J$  = 8.0, 2.0 Hz, 1H), 4.06 (s, 3H), 3.86 (s, 3H); <sup>13</sup>C NMR (100 MHz, CD<sub>3</sub>OD)  $\delta$  161.2, 151.8, 133.0, 132.4, 126.4, 121.4, 115.8, 108.6, 55.9, 35.2; IR (KBr)  $\nu$  = 3114, 3087, 2931, 2826, 1513, 1309, 1294, 1215, 1162, 1108, 1091, 1045, 985, 856, 811, 727 cm<sup>-1</sup>; HRMS (ESI)  $m/z$  calcd for C<sub>11</sub>H<sub>14</sub><sup>11</sup>BN<sub>2</sub>O<sub>3</sub> [M+H]<sup>+</sup> 233.1097, Found 233.1089.

## Preparation of (2-(1-Methyl-1H-imidazol-2-yl)-4-(trifluoromethyl)phenyl)boronic acid (**1e**)

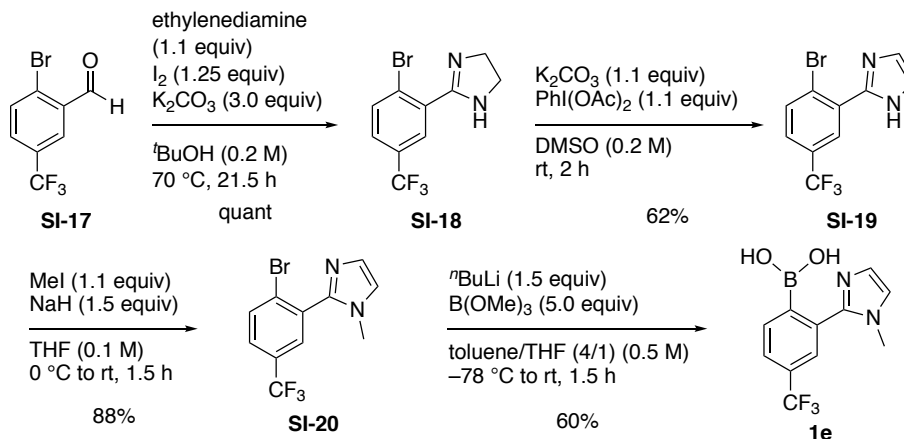

Ethylenediamine (0.580 mL, 8.69 mmol, 1.1 equiv) was added to a stirred solution of 2-bromo-5-(trifluoromethyl)benzaldehyde (**SI-17**) (2.00 g, 7.90 mmol, 1.0 equiv) in  $t$ -BuOH (40 mL, 0.2 M). After stirring at room temperature for 30 minutes under nitrogen,  $I_2$  (2.51 g, 9.88 mmol, 1.25 equiv)<sup>5</sup> and  $K_2CO_3$  (3.28 g, 23.7 mmol, 3.0 equiv) were added. After stirring at 70 °C for 21 hours, the reaction was quenched by addition of sat.  $Na_2SO_3$  aq. and the resulting mixture was extracted three times with chloroform. The combined organic layers were washed with sat.  $NaHCO_3$  aq. and brine, dried over  $Na_2SO_4$ , filtered, and concentrated *in vacuo* to give crude imidazoline **SI-18** (2.48 g). The resulting crude material was used in the next step without further purification.

$PhI(OAc)_2$  (1.40 g, 4.35 mmol, 1.1 equiv)<sup>5</sup> was added to a stirred solution of imidazoline **SI-18** (1.16 g, 3.95 mmol, 1.0 equiv) and  $K_2CO_3$  (602 mg, 4.35 mmol, 3.0 equiv) in DMSO (19.8 mL, 0.2 M). After stirring at room temperature for 2 hours, the reaction was quenched by addition of sat.  $NaHCO_3$  aq. and the resulting mixture was extracted three times with ethyl acetate. The combined organic layers were washed with water and brine, dried over  $Na_2SO_4$ , filtered, and concentrated *in vacuo*. The resulting crude material was purified by recrystallization from chloroform to give **SI-19** (713 mg, 2.45 mmol, 62%) as a pale yellow solid.

Data for **SI-19**:  $R_f$  = 0.40 (2/1  $n$ -hexane / EtOAc); mp 170-175 °C;  $^1H$  NMR (400 MHz,  $CDCl_3$ )  $\delta$  10.3 (br, 1H), 8.56 (d,  $J$  = 2.0 Hz, 1H), 7.76 (d,  $J$  = 8.4 Hz, 1H), 7.44 (dd,  $J$  = 8.4, 2.0 Hz, 1H), 7.26 (br, 2H);  $^{13}C$  NMR (100 MHz,  $CDCl_3$ )  $\delta$  143.3, 134.5, 134.3, 131.3, 130.5 (q,  $^2J_{C-F}$  = 33.2 Hz), 128.4 (q,  $^3J_{C-F}$  = 3.8 Hz), 126.0 (q,  $^3J_{C-F}$  = 3.5 Hz), 123.4 (q,  $^1J_{C-F}$  = 271.5 Hz), 122.6 (q,  $^4J_{C-F}$  = 1.5 Hz); IR (KBr)  $\nu$  = 3034, 2798, 1612,

1402, 1327, 1185, 1123, 1076, 1029, 971, 828, 730  $\text{cm}^{-1}$ ; HRMS (ESI)  $m/z$  calcd for  $\text{C}_{10}\text{H}_7^{79}\text{BrF}_3\text{N}_2$   $[\text{M}+\text{H}]^+$  290.9745, Found 290.9744.

A solution of imidazole **SI-19** (100 mg, 0.344 mmol, 1.0 equiv) in THF (1.7 mL, 0.2 M) was added to a stirred suspension of NaH (12.4 mg, 0.516 mmol, 1.5 equiv) in THF (1.7 mL, 0.2 M). After stirring at 0 °C for 30 minutes, iodomethane (23.5  $\mu\text{L}$ , 0.378 mmol, 1.1 equiv) was added. After stirring at room temperature for 1 hour, the resulting mixture was poured onto ice and extracted three times with ethyl acetate. The combined organic layers were washed with water and brine, dried over  $\text{Na}_2\text{SO}_4$ , filtered, and concentrated *in vacuo*. The resulting crude material was purified by silica gel chromatography (hexane : ethyl acetate = 2 : 1) to give **SI-20** (91.8 mg, 0.301 mmol, 88%) as a pale yellow oil.

Data for **SI-20**:  $R_f$  = 0.25 (2/1 *n*-hexane / EtOAc);  $^1\text{H}$  NMR (400 MHz,  $\text{CDCl}_3$ )  $\delta$  7.81 (d,  $J$  = 8.4 Hz, 1H), 7.72 (d,  $J$  = 2.3 Hz, 1H), 7.58 (dd,  $J$  = 8.4, 2.3 Hz, 1H), 7.17 (d,  $J$  = 1.2 Hz, 1H), 7.02 (d,  $J$  = 1.2 Hz, 1H), 3.55 (s, 3H);  $^{13}\text{C}$  NMR (100 MHz,  $\text{CDCl}_3$ )  $\delta$  145.3, 133.39, 133.36, 130.0 (q,  $^2J_{\text{C-F}}$  = 33.2 Hz), 129.5 (q,  $^3J_{\text{C-F}}$  = 3.8 Hz), 128.7, 128.4 (q,  $^4J_{\text{C-F}}$  = 1.5 Hz), 127.4 (q,  $^3J_{\text{C-F}}$  = 3.5 Hz), 123.4 (q,  $^1J_{\text{C-F}}$  = 271.5 Hz), 121.4, 33.5; IR (neat)  $\nu$  = 1610, 1327, 1280, 1258, 1174, 1131, 1022, 908, 830, 750, 689  $\text{cm}^{-1}$ ; HRMS (ESI)  $m/z$  calcd for  $\text{C}_{11}\text{H}_9^{79}\text{BrF}_3\text{N}_2$   $[\text{M}+\text{H}]^+$  304.9901, Found 304.9902.

*n*-BuLi in *n*-hexane (1.55 M, 194  $\mu\text{L}$ , 0.300 mmol, 1.5 equiv) was added to a stirred solution of **SI-20** (61.0 mg, 0.200 mmol, 1.0 equiv) in dry toluene/THF (4 / 1, 0.4 mL, 0.5 M) at  $-78$  °C under argon. After stirring at  $-78$  °C for 30 minutes,  $\text{B}(\text{OMe})_3$  (111  $\mu\text{L}$ , 1.0 mmol, 5.0 equiv) was added at  $-78$  °C, and then the resulting mixture was warmed to room temperature. After stirring for 1 hour, the mixture was concentrated. The resulting crude material was purified by amino silica gel chromatography (dichloromethane to dichloromethane : methanol = 50 : 1) to give **1e** (32 mg, 1.20 mmol, 60%) as a pale yellow amorphous material.

Data for **1e**:  $R_f$  (NH) = 0.43 (20/1  $\text{CH}_2\text{Cl}_2$  / MeOH);  $^1\text{H}$  NMR (400 MHz,  $\text{CD}_3\text{OD}$ )  $\delta$  7.95 (s, 1H), 7.72 (br d,  $J$  = 7.6 Hz, 1H), 7.69 (br d,  $J$  = 7.6 Hz, 1H), 7.37 (d,  $J$  = 1.6 Hz, 1H), 7.28 (d,  $J$  = 1.6 Hz, 1H), 4.12 (s, 3H);  $^{13}\text{C}$  NMR (100 MHz,  $\text{CD}_3\text{OD}$ )  $\delta$  150.6, 132.7, 132.0, 131.1 (q,  $^2J_{\text{C-F}}$  = 32.0 Hz), 127.4 (q,  $^3J_{\text{C-F}}$  = 4.0 Hz), 127.3, 125.7 (q,  $^1J_{\text{C-F}}$  = 270.1 Hz), 121.7, 118.1 (q,  $^3J_{\text{C-F}}$  = 4.0 Hz), 35.4; IR (neat)  $\nu$  = 3107, 2957, 1563, 1460, 1394, 1330, 1121, 989, 834, 730, 664, 583  $\text{cm}^{-1}$ ; HRMS (ESI)  $m/z$  calcd for  $\text{C}_{11}\text{H}_{11}^{11}\text{BF}_3\text{N}_2\text{O}_2$   $[\text{M}+\text{H}]^+$  271.0866, Found 271.0859.

#### 4. Supplementary data for boronic acids

##### SI-Scheme 1. Preparation of boronic ester SI-22.

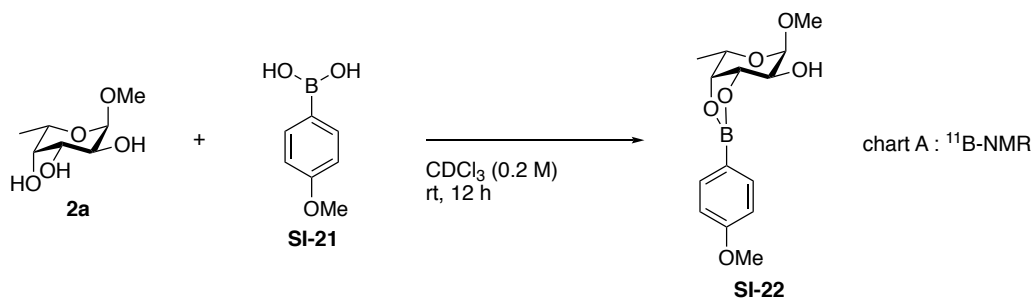

##### SI-Scheme 2. Preparation of borate complex 7.

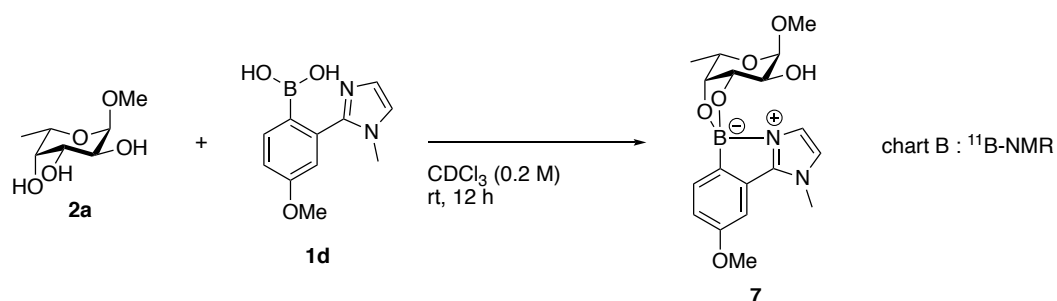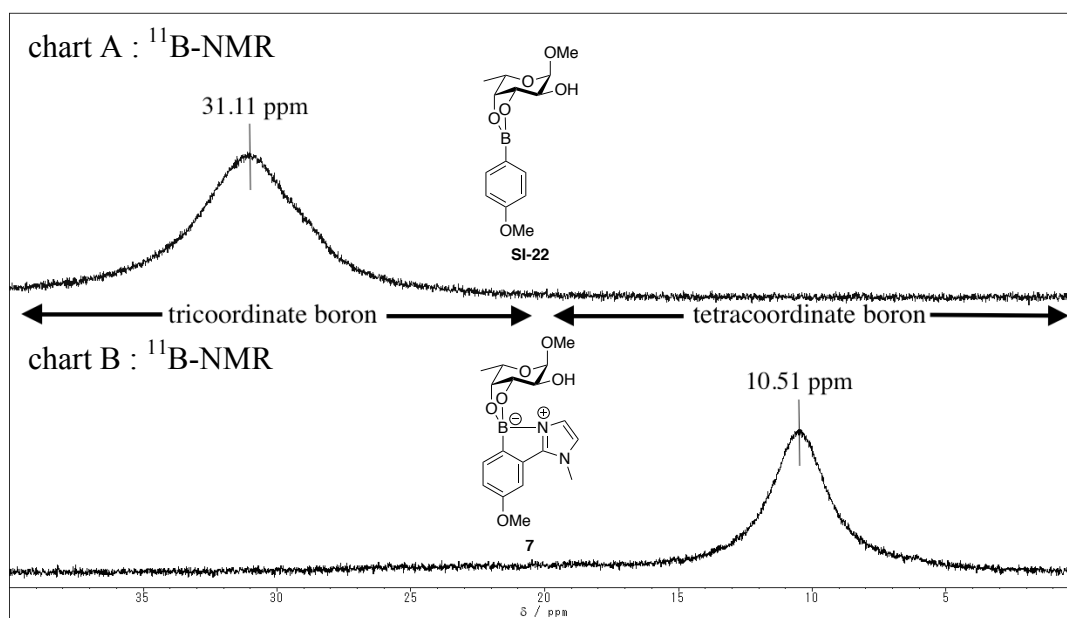

SI-Figure 9. Chart A:  $^{11}\text{B}$ -NMR spectrum of SI-22. Chart B:  $^{11}\text{B}$ -NMR spectrum of 7.

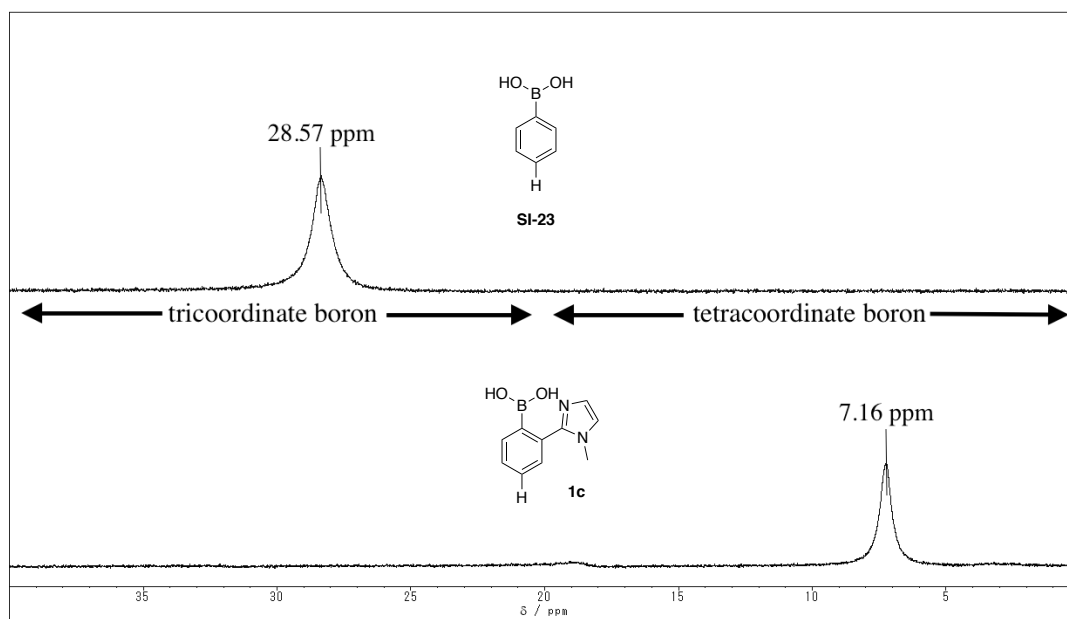

SI-Figure 10 .  $^{11}\text{B}$ -NMR spectra of SI-23 and 1c in  $\text{CD}_3\text{OD}$ .

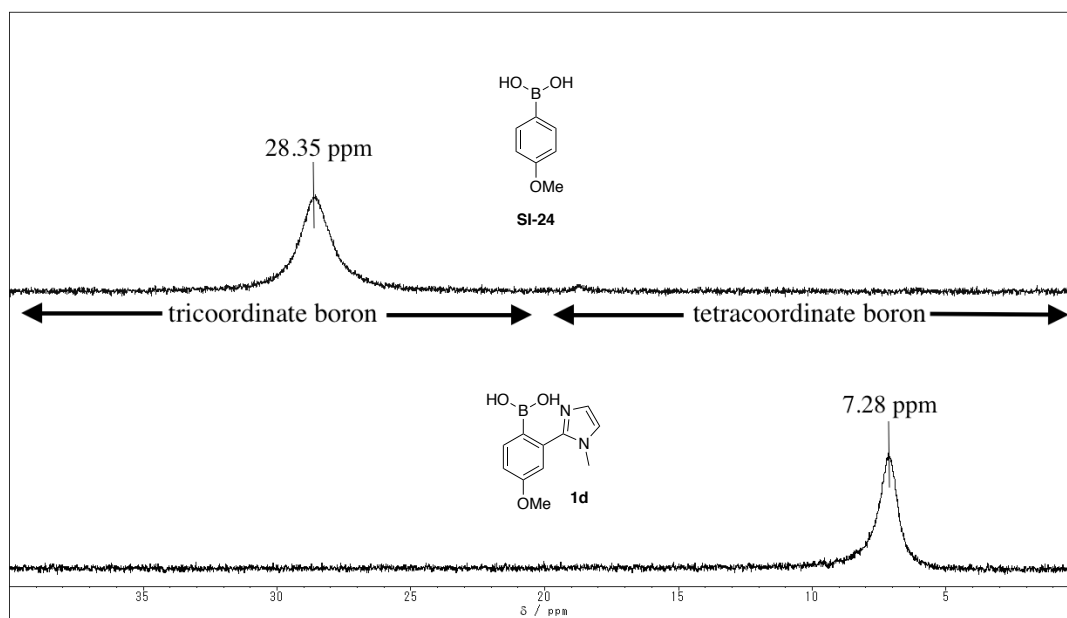

SI-Figure 11 .  $^{11}\text{B}$ -NMR spectra of SI-24 and 1d in  $\text{CD}_3\text{OD}$ .

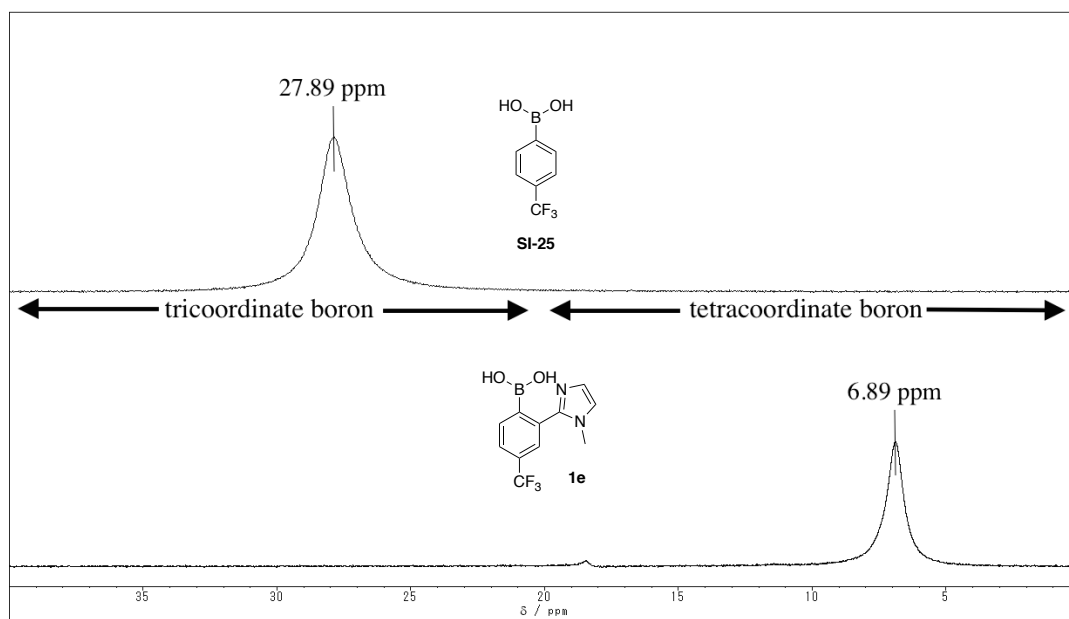

**SI-Figure 12.**  $^{11}\text{B}$ -NMR spectra of **SI-25** and **1e** in  $\text{CD}_3\text{OD}$ .



## 5. Boronic acid catalyzed site-selective benzylation of **2a** (Table 1)

Methyl 3-*O*-benzoyl- $\alpha$ -L-fucopyranoside (**3a**)<sup>6</sup>

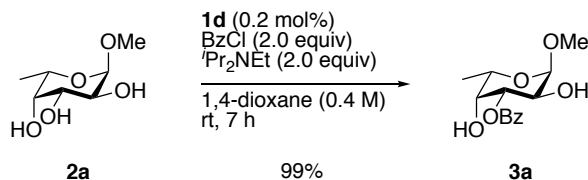

Benzoyl chloride (46.9  $\mu\text{L}$ , 0.400 mmol, 2.0 equiv) was added to a stirred solution of methyl  $\alpha$ -L-fucopyranoside (**2a**) (35.6 mg, 0.200 mmol, 1.0 equiv), boronic acid **1d** (0.002 M in 1,4-dioxane, 200  $\mu\text{L}$ , 0.400  $\mu\text{mol}$ , 0.2 mol%) and *N,N*-diisopropylethylamine (69.6  $\mu\text{L}$ , 0.400 mmol, 2.0 equiv) in dry 1,4-dioxane (300  $\mu\text{L}$ , total 0.4 M) under ambient atmosphere. After stirring for 7 hours, the reaction was quenched by addition of 1 M HCl (2.0 mL) and the resulting mixture was extracted two times with ethyl acetate. The combined organic layers were washed with sat.  $\text{NaHCO}_3$  aq., water and brine, dried over  $\text{Na}_2\text{SO}_4$ , filtered, and concentrated *in vacuo*. The resulting crude material was purified by silica gel chromatography (hexane : ethyl acetate = 1 : 1) to give **3a** (56.3 mg, 0.199 mmol, 99%) as a white solid.

Data for **3a**:  $R_f$  = 0.28 (1/1 *n*-hexane / EtOAc); mp 81–84  $^\circ\text{C}$ ;  $[\alpha]_D^{23}$   $-184.0^\circ$  ( $c$  = 1.0,  $\text{CHCl}_3$ );  $^1\text{H}$  NMR (400 MHz,  $\text{CDCl}_3$ )  $\delta$  8.10–8.08 (m, 2H), 7.59–7.55 (m, 1H), 7.46–7.43 (m, 2H), 5.28 (dd,  $J$  = 10.4, 3.2 Hz, 1H, *H*-3), 4.84 (d,  $J$  = 4.0 Hz, 1H, *H*-1), 4.14 (dd,  $J$  = 10.4, 4.0 Hz, 1H, *H*-2), 4.07 (q,  $J$  = 6.4 Hz, 1H, *H*-5), 3.98 (d,  $J$  = 3.2 Hz, 1H, *H*-4), 3.46 (s, 3H), 2.13 (br, 2H, *OH*-2, *OH*-4), 1.31 (d,  $J$  = 6.4 Hz, 3H, *H*-6);  $^{13}\text{C}$  NMR (100 MHz,  $\text{CDCl}_3$ )  $\delta$  166.4, 133.3, 129.8, 129.7, 128.4, 99.7, 74.5, 70.8, 67.1, 65.7, 55.5, 16.0; IR (KBr)  $\nu$  = 3470, 2937, 1709, 1451, 1280, 1128, 1052, 961, 848, 756, 713  $\text{cm}^{-1}$ ; HRMS (ESI)  $m/z$  calcd for  $\text{C}_{14}\text{H}_{18}\text{NaO}_6$   $[\text{M}+\text{Na}]^+$  305.1001, found 305.0994.

Methyl 2-*O*-benzoyl- $\alpha$ -L-fucopyranoside (**4**)

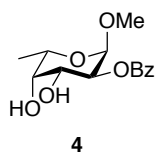

Data for **4**: white solid;  $R_f$  = 0.32 (20/1  $\text{CHCl}_3$  / MeOH); mp 168–171 °C;  $[\alpha]_D^{25}$   $-137.7^\circ$  ( $c$  = 1.0,  $\text{CHCl}_3$ );  $^1\text{H}$  NMR (400 MHz,  $\text{CDCl}_3$ )  $\delta$  8.08–8.06 (m, 2H), 7.59–7.55 (m, 1H), 7.45–7.41 (m, 2H), 5.21 (dd,  $J$  = 10.0, 4.0 Hz, 1H,  $H$ -2), 4.98 (d,  $J$  = 4.0 Hz, 1H,  $H$ -1), 4.17 (dd,  $J$  = 10.0, 3.2 Hz, 1H,  $H$ -3), 4.04 (q,  $J$  = 6.4 Hz, 1H,  $H$ -5), 3.87 (d,  $J$  = 3.2 Hz, 1H,  $H$ -4), 3.39 (s, 3H), 1.83 (br, 2H, OH-3, OH-4), 1.34 (d,  $J$  = 6.4 Hz, 3H,  $H$ -6);  $^{13}\text{C}$  NMR (100 MHz,  $\text{CDCl}_3$ )  $\delta$  167.1, 133.3, 129.9, 129.6, 128.4, 97.5, 72.4, 72.3, 68.9, 65.3, 55.5, 16.1; IR (KBr)  $\nu$  = 3524, 2987, 2936, 1718, 1691, 1457, 1339, 1289, 1257, 1126, 1095, 1039, 998, 963, 901, 716  $\text{cm}^{-1}$ ; HRMS (ESI)  $m/z$  calcd for  $\text{C}_{14}\text{H}_{18}\text{NaO}_6$   $[\text{M}+\text{Na}]^+$  305.1001, found 305.1001.

Methyl 2,3-*O*-dibenzoyl- $\alpha$ -L-fucopyranoside (**5**)

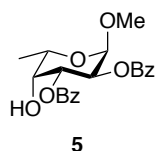

Data for **5**: colorless oil;  $R_f$  = 0.38 (3/1 *n*-hexane / EtOAc);  $[\alpha]_D^{25}$   $-147.4^\circ$  ( $c$  = 1.0,  $\text{CHCl}_3$ );  $^1\text{H}$  NMR (400 MHz,  $\text{CDCl}_3$ )  $\delta$  8.01–7.97 (m, 4H), 7.53–7.48 (m, 2H), 7.40–7.35 (m, 4H), 5.70 (dd,  $J$  = 10.8, 3.2 Hz, 1H,  $H$ -3), 5.61 (dd,  $J$  = 10.8, 3.6 Hz, 1H,  $H$ -2), 5.12 (d,  $J$  = 3.6 Hz, 1H,  $H$ -1), 4.21 (q,  $J$  = 6.4 Hz, 1H,  $H$ -5), 4.14 (d,  $J$  = 3.2 Hz, 1H,  $H$ -4), 3.43 (s, 3H), 1.36 (d,  $J$  = 6.4 Hz, 3H,  $H$ -6);  $^{13}\text{C}$  NMR (100 MHz,  $\text{CDCl}_3$ )  $\delta$  166.1, 165.8, 133.3, 133.2, 129.82, 129.75, 129.5, 129.4, 128.44, 128.36, 97.5, 71.5, 70.9, 68.9, 65.4, 55.5, 16.0; IR (neat)  $\nu$  = 3502, 2934, 1722, 1602, 1452, 1282, 1109, 1071, 1051, 1030, 965, 763, 710  $\text{cm}^{-1}$ ; HRMS (ESI)  $m/z$  calcd for  $\text{C}_{21}\text{H}_{22}\text{NaO}_7$   $[\text{M}+\text{Na}]^+$  409.1263, found 409.1261.

Methyl 2,3,4-*O*-tribenzoyl- $\alpha$ -L-fucopyranoside (**6**)

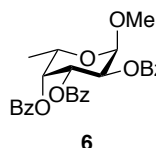

Data for **6**: colorless oil;  $R_f$  = 0.28 (10/1 *n*-hexane / EtOAc);  $[\alpha]_D^{25}$   $-251.7^\circ$  ( $c$  = 1.0,  $\text{CHCl}_3$ );  $^1\text{H}$  NMR (400 MHz,  $\text{CDCl}_3$ )  $\delta$  8.13–8.11 (m, 2H), 8.00–7.98 (m, 2H), 7.81–7.79 (m, 2H), 7.64–7.59 (m, 1H), 7.53–7.48 (m, 3H), 7.44–7.35 (m, 3H), 7.26–7.22 (m, 2H), 5.97 (dd,  $J$  = 10.8, 3.6 Hz, 1H,  $H$ -3), 5.77 (dd,  $J$  = 3.6, 0.8 Hz, 1H,  $H$ -4), 5.66 (dd,  $J$  = 10.8, 3.6 Hz, 1H,  $H$ -2), 5.25 (d,  $J$  = 3.6 Hz, 1H,  $H$ -1), 4.40 (dq,  $J$  = 6.4, 0.8 Hz, 1H,  $H$ -5), 3.48 (s, 3H), 1.30 (d,  $J$  = 6.4 Hz, 3H,  $H$ -6);  $^{13}\text{C}$  NMR (100 MHz,  $\text{CDCl}_3$ )  $\delta$  166.1, 166.0, 165.6, 133.33, 133.25, 133.0, 129.9, 129.8, 129.6, 129.4, 129.3, 128.5, 128.4, 128.2, 97.6, 72.0, 69.4, 68.7, 64.7, 55.6, 16.1; IR (neat)  $\nu$  = 2938, 1727, 1602, 1452, 1285, 1108, 1071, 1053, 1027, 759, 712  $\text{cm}^{-1}$ ; HRMS (ESI)  $m/z$  calcd for  $\text{C}_{28}\text{H}_{26}\text{NaO}_8$   $[\text{M}+\text{Na}]^+$  513.1525, found 513.1520.

## 6. Gram-scale synthesis (Scheme 1)

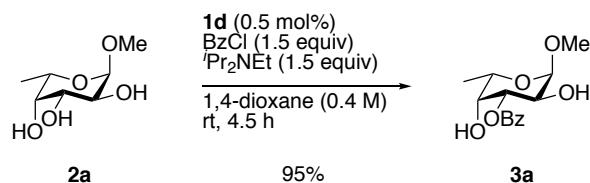

Benzoyl chloride (9.86 mL, 8.42 mmol, 1.5 equiv) was added to a stirred solution of methyl  $\alpha$ -L-fucopyranoside (**2a**) (1.00 g, 5.61 mmol, 1.0 equiv), boronic acid **1d** (6.5 mg, 0.5 mol%) and  $N,N$ -diisopropylethylamine (1.47 mL, 8.42 mmol, 1.5 equiv) in dry 1,4-dioxane (14 mL, 0.4 M) under ambient atmosphere. After stirring for 4.5 hours, the reaction was quenched by addition of 1 M HCl (10 mL) and the resulting mixture was extracted two times with ethyl acetate. The combined organic layers were washed with sat.  $\text{NaHCO}_3$  aq., water and brine, dried over  $\text{Na}_2\text{SO}_4$ , filtered, and concentrated *in vacuo*. The resulting crude material was purified by silica gel chromatography (hexane : ethyl acetate = 1 : 1) to give **3a** (1.51 g, 5.35 mmol, 95%) as a colorless amorphous material.

## 7. Boronic acid catalyzed site-selective mono-benzoylation of carbohydrates (Scheme 2)

Methyl 6-((*tert*-butyldimethylsilyl)oxy)-3-*O*-benzoyl- $\alpha$ -D-galactopyranoside (**3b**)<sup>6</sup>

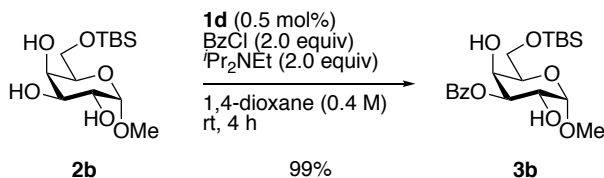

Benzoyl chloride (46.9  $\mu\text{L}$ , 0.400 mmol, 2.0 equiv) was added to a stirred mixture of methyl 6-((*tert*-butyldimethylsilyl)oxy)- $\alpha$ -D-galactopyranoside (**2b**) (61.7 mg, 0.200 mmol, 1.0 equiv), boronic acid **1d** (0.002 M in 1,4-dioxane, 500  $\mu\text{L}$ , 1.00  $\mu\text{mol}$ , 0.5 mol%) and *N,N*-diisopropylethylamine (69.6  $\mu\text{L}$ , 0.400 mmol, 2.0 equiv) under ambient atmosphere. After stirring for 4 hours, the resulting mixture was diluted with chloroform and washed with 1 M HCl, sat.  $\text{NaHCO}_3$  aq., water and brine, dried over  $\text{Na}_2\text{SO}_4$ , filtered, and concentrated *in vacuo*. The resulting crude material was purified by silica gel chromatography (hexane : ethyl acetate = 3 : 1) to give **3b** (81.9 mg, 0.199 mmol, 99%) as a white solid.

Data for **3b**:  $R_f$  = 0.30 (2/1 *n*-hexane / EtOAc); mp 98–101  $^\circ\text{C}$ ;  $[\alpha]_D^{23} +128.3^\circ$  ( $c$  = 1.0,  $\text{CHCl}_3$ );  $^1\text{H}$  NMR (400 MHz,  $\text{CDCl}_3$ )  $\delta$  8.13–8.10 (m, 2H), 7.59–7.55 (m, 1H), 7.47–7.43 (m, 2H), 5.27 (dd,  $J$  = 10.4, 3.2 Hz, 1H, *H*-3), 4.91 (d,  $J$  = 3.6 Hz, 1H, *H*-1), 4.32 (br d,  $J$  = 3.2 Hz, 1H, *H*-4), 4.25 (dt,  $J$  = 10.4, 3.6 Hz, 1H, *H*-2), 3.95 (dd,  $J$  = 10.8, 5.2 Hz, 1H, *H*-6), 3.90 (dd,  $J$  = 10.8, 4.4 Hz, 1H, *H*-6), 3.86–3.84 (m, 1H, *H*-5), 3.47 (s, 3H), 3.12 (br, 1H, OH-4), 2.06 (br, 1H, OH-2), 0.90 (s, 9H), 0.101 (s, 3H), 0.099 (s, 3H);  $^{13}\text{C}$  NMR (100 MHz,  $\text{CDCl}_3$ )  $\delta$  166.5, 133.2, 129.9, 129.8, 128.4, 99.9, 74.2, 69.34, 69.28, 67.4, 63.6, 55.4, 25.8, 18.3, –5.52, –5.54; IR (KBr)  $\nu$  = 3569, 3304, 2937, 2853, 1771, 1450, 1318, 1292, 1253, 1143, 1092, 1054, 1038, 837, 773, 716  $\text{cm}^{-1}$ ; HRMS (ESI)  $m/z$  calcd for  $\text{C}_{20}\text{H}_{32}\text{NaO}_7\text{Si}$   $[\text{M}+\text{Na}]^+$  435.1815, found 435.1805.

Allyl 6-((*tert*-butyldimethylsilyl)oxy)-3-*O*-benzoyl- $\alpha$ -D-galactopyranoside (**3c**)

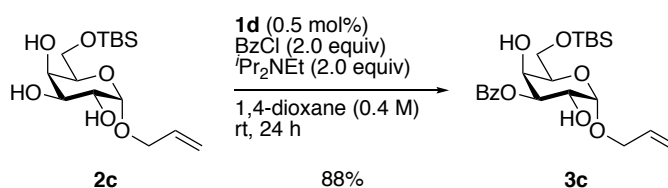

Benzoyl chloride (46.9  $\mu\text{L}$ , 0.400 mmol, 2.0 equiv) was added to a stirred mixture of allyl 6-((*tert*-butyldimethylsilyl)oxy)- $\alpha$ -D-galactopyranoside (**2c**) (66.9 mg, 0.200 mmol, 1.0 equiv), boronic acid **1d** (0.002 M in 1,4-dioxane, 500  $\mu\text{L}$ , 1.00  $\mu\text{mol}$ , 0.5 mol%) and *N,N*-diisopropylethylamine (69.6  $\mu\text{L}$ , 0.400 mmol, 2.0 equiv) under ambient atmosphere. After stirring for 24 hours, the resulting mixture was diluted with chloroform and washed with 1 M HCl, sat.  $\text{NaHCO}_3$  aq., water and brine, dried over  $\text{Na}_2\text{SO}_4$ , filtered, and concentrated *in vacuo*. The resulting crude material was purified by silica gel chromatography (hexane : ethyl acetate = 4 : 1) to give **3c** (77.2 mg, 0.176 mmol, 88%) as a white solid.

Data for **3c**:  $R_f$  = 0.45 (2/1 *n*-hexane / EtOAc); mp 60–64  $^{\circ}\text{C}$ ;  $[\alpha]_{\text{D}}^{23} +127.5^{\circ}$  ( $c$  = 1.0,  $\text{CHCl}_3$ );  $^1\text{H}$  NMR (400 MHz,  $\text{CDCl}_3$ )  $\delta$  8.12–8.10 (m, 2H), 7.58–7.54 (m, 1H), 7.45–7.41 (m, 2H), 5.93 (dddd,  $J$  = 17.2, 10.4, 6.1, 5.4 Hz, 1H), 5.32 (dq,  $J$  = 17.2, 1.6 Hz, 1H), 5.30 (dd,  $J$  = 10.2, 3.0 Hz, 1H, *H*-3), 5.23 (ddt,  $J$  = 10.4, 1.6, 1.2 Hz, 1H), 5.05 (d,  $J$  = 4.0 Hz, 1H, *H*-1), 4.32 (br d,  $J$  = 3.0 Hz, 1H, *H*-4), 4.28–4.23 (m, 2H, *H*-2, *H*-6), 4.10–4.04 (m, 1H, *H*-6), 3.93–3.87 (m, 3H, *H*-5,  $\text{OCH}_2\text{CHCH}_2$ ), 0.90 (s, 9H), 0.09 (s, 6H);  $^{13}\text{C}$  NMR (100 MHz,  $\text{CDCl}_3$ )  $\delta$  166.6, 133.5, 133.2, 129.9, 129.8, 128.3, 117.9, 98.1, 74.2, 69.6, 69.3, 68.7, 67.3, 63.6, 25.8, 18.2, –5.53, –5.54; IR (KBr)  $\nu$  = 3527, 3450, 2930, 2857, 1701, 1281, 1254, 1094, 1028, 933, 839, 777, 713  $\text{cm}^{-1}$ ; HRMS (ESI)  $m/z$  calcd for  $\text{C}_{22}\text{H}_{34}\text{NaO}_7\text{Si}$   $[\text{M}+\text{Na}]^+$  461.1972, found 461.1967.

Allyl 6-((*tert*-butyldimethylsilyl)oxy)-3-*O*-benzoyl- $\beta$ -D-galactopyranoside (**3d**)

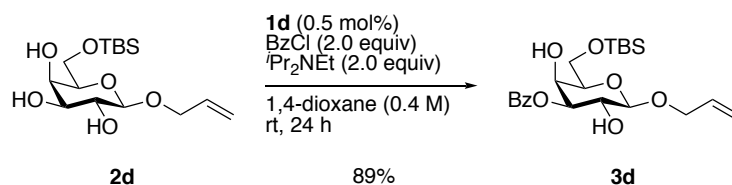

Benzoyl chloride (46.9  $\mu\text{L}$ , 0.400 mmol, 2.0 equiv) was added to a stirred mixture of allyl 6-((*tert*-butyldimethylsilyl)oxy)- $\beta$ -D-galactopyranoside (**2d**) (66.9 mg, 0.200 mmol, 1.0 equiv), boronic acid **1d** (0.002 M in 1,4-dioxane, 500  $\mu\text{L}$ , 1.00  $\mu\text{mol}$ , 0.5 mol%) and *N,N*-diisopropylethylamine (69.6  $\mu\text{L}$ , 0.400 mmol, 2.0 equiv) in dry 1,4-dioxane under ambient atmosphere. After stirring for 24 hours, the resulting mixture was diluted with chloroform and washed with 1 M HCl, sat.  $\text{NaHCO}_3$  aq., water and brine, dried over  $\text{Na}_2\text{SO}_4$ , filtered, and concentrated *in vacuo*. The resulting crude material was purified by silica gel chromatography (hexane : ethyl acetate = 4 : 1) to give **3d** (78.1 mg, 0.178 mmol, 89%) as a colorless oil.

Data for **3d**:  $R_f$  = 0.23 (4/1 *n*-hexane / EtOAc);  $[\alpha]_D^{24} +17.1^\circ$  ( $c$  = 1.0,  $\text{CHCl}_3$ );  $^1\text{H}$  NMR (400 MHz,  $\text{CDCl}_3$ )  $\delta$  8.11–8.09 (m, 2H), 7.58–7.54 (m, 1H), 7.46–7.42 (m, 2H), 5.95 (dddd,  $J$  = 17.2, 10.0, 6.4, 5.2 Hz, 1H), 5.32 (dq,  $J$  = 17.2, 1.6 Hz, 1H), 5.22 (ddt,  $J$  = 10.4, 1.6, 1.2 Hz, 1H), 5.08 (dd,  $J$  = 10.0, 3.2 Hz, 1H, *H*-3), 4.44 (d,  $J$  = 7.6 Hz, 1H, *H*-1), 4.41 (ddt,  $J$  = 12.4, 5.2, 1.2 Hz, 1H), 4.28 (d,  $J$  = 3.2 Hz, 1H, *H*-4), 4.16 (ddt,  $J$  = 12.4, 6.4, 1.2 Hz, 1H), 4.07 (dd,  $J$  = 10.0, 7.6 Hz, 1H, *H*-2), 3.95 (dd,  $J$  = 10.4, 5.6 Hz, 1H, *H*-6), 3.89 (dd,  $J$  = 10.4, 5.6 Hz, 1H, *H*-6), 3.59 (t,  $J$  = 5.6 Hz, 1H, *H*-5), 2.84 (br, 1H, OH), 2.47 (br, 1H, OH), 0.89 (s, 9H), 0.09 (s, 6H);  $^{13}\text{C}$  NMR (100 MHz,  $\text{CDCl}_3$ )  $\delta$  166.2, 133.7, 133.3, 129.9, 129.7, 128.4, 118.0, 102.3, 75.8, 74.0, 70.1, 69.4, 68.0, 62.8, 25.8, 18.3, –5.50; IR (neat)  $\nu$  = 3480, 2954, 2929, 2884, 2857, 1719, 1452, 1281, 1111, 1071, 997, 930, 839, 780, 713  $\text{cm}^{-1}$ ; HRMS (ESI)  $m/z$  calcd for  $\text{C}_{22}\text{H}_{34}\text{NaO}_7\text{Si}$   $[\text{M}+\text{Na}]^+$  461.1972, found 461.1966.

Propargyl 6-((*tert*-butyldimethylsilyl)oxy)-3-*O*-benzoyl- $\beta$ -D-galactopyranoside (**3e**)

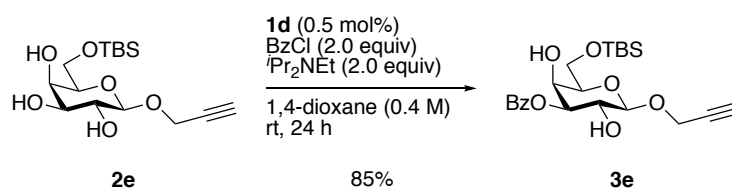

Benzoyl chloride (46.9  $\mu\text{L}$ , 0.400 mmol, 2.0 equiv) was added to a stirred mixture of propargyl 6-((*tert*-butyldimethylsilyl)oxy)- $\beta$ -D-galactopyranoside (**2e**) (66.5 mg, 0.200 mmol, 1.0 equiv), boronic acid **1d** (0.002 M in 1,4-dioxane, 500  $\mu\text{L}$ , 1.00  $\mu\text{mol}$ , 0.5 mol%) and *N,N*-diisopropylethylamine (69.6  $\mu\text{L}$ , 0.400 mmol, 2.0 equiv) under ambient atmosphere. After stirring for 24 hours, the resulting mixture was diluted with chloroform and washed with 1 M HCl, sat.  $\text{NaHCO}_3$  aq., water and brine, dried over  $\text{Na}_2\text{SO}_4$ , filtered, and concentrated *in vacuo*. The resulting crude material was purified by silica gel chromatography (hexane : ethyl acetate = 4 : 1) to give **3e** (74.1 mg, 0.170 mmol, 85%) as a colorless oil.

Data for **3e**:  $R_f$  = 0.18 (4/1 *n*-hexane / EtOAc);  $[\alpha]_D^{24}$   $-7.4^\circ$  ( $c$  = 1.0,  $\text{CHCl}_3$ );  $^1\text{H}$  NMR (400 MHz,  $\text{CDCl}_3$ )  $\delta$  8.11–8.08 (m, 2H), 7.58–7.53 (m, 1H), 7.45–7.41 (m, 2H), 5.11 (dd,  $J$  = 10.0, 3.1 Hz, 1H, *H*-3), 4.62 (d,  $J$  = 7.7 Hz, 1H, *H*-1), 4.46 (dd,  $J$  = 15.8, 2.4 Hz, 1H,  $\text{OCH}_2\text{CCH}$ ), 4.40 (dd,  $J$  = 15.8, 2.4 Hz, 1H,  $\text{OCH}_2\text{CCH}$ ), 4.29 (br, 1H, *H*-4), 4.08 (dd,  $J$  = 10.0, 7.7 Hz, 1H, *H*-2), 3.95 (dd,  $J$  = 10.6, 5.7 Hz, 1H, *H*-6), 3.89 (dd,  $J$  = 10.6, 4.7 Hz, 1H, *H*-6), 3.63–3.60 (m, 1H, *H*-5), 2.49 (t,  $J$  = 2.4 Hz, 1H,  $\text{OCH}_2\text{CCH}$ ), 0.89 (s, 9H), 0.08 (s, 6H);  $^{13}\text{C}$  NMR (100 MHz,  $\text{CDCl}_3$ )  $\delta$  166.2, 133.3, 129.9, 129.6, 128.4, 101.0, 78.5, 75.7, 75.4, 74.0, 69.1, 68.0, 62.8, 55.7, 25.8, 18.2,  $-5.51$ ; IR (neat)  $\nu$  = 3452, 2930, 1714, 1280, 1109, 839, 781, 713  $\text{cm}^{-1}$ ; HRMS (ESI)  $m/z$  calcd for  $\text{C}_{22}\text{H}_{32}\text{NaO}_7\text{Si}$   $[\text{M}+\text{Na}]^+$  459.1815, found 459.1819.

Phenylthio 6-((*tert*-butyldimethylsilyl)oxy)-3-*O*-benzoyl- $\beta$ -D-galactopyranoside (**3f**)

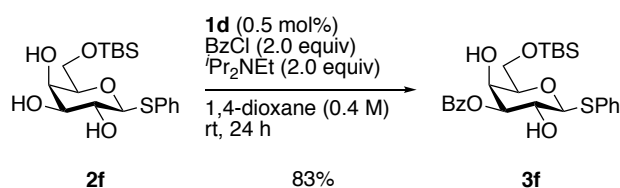

Benzoyl chloride (46.9  $\mu\text{L}$ , 0.400 mmol, 2.0 equiv) was added to a stirred mixture of phenylthio 6-((*tert*-butyldimethylsilyl)oxy)- $\beta$ -D-galactopyranoside (**2f**) (77.3 mg, 0.20 mmol, 1.0 equiv), boronic acid **1d** (0.002 M in 1,4-dioxane, 500  $\mu\text{L}$ , 1.00  $\mu\text{mol}$ , 0.5 mol%) and *N,N*-diisopropylethylamine (69.6  $\mu\text{L}$ , 0.400 mmol, 2.0 equiv) in dry 1,4-dioxane under ambient atmosphere. After stirring for 24 hours, the resulting mixture was diluted with chloroform and washed with 1 M HCl, sat.  $\text{NaHCO}_3$  aq., water and brine, dried over  $\text{Na}_2\text{SO}_4$ , filtered, and concentrated *in vacuo*. The resulting crude material was purified by silica gel chromatography (hexane : ethyl acetate = 4 : 1) to give **3f** (81.7 mg, 0.167 mmol, 83%) as a white solid.

Data for **3f**:  $R_f$  = 0.33 (4/1 *n*-hexane / EtOAc); mp 76–80  $^{\circ}\text{C}$ ;  $[\alpha]_{\text{D}}^{23} +9.6^{\circ}$  ( $c$  = 1.0,  $\text{CHCl}_3$ );  $^1\text{H}$  NMR (400 MHz,  $\text{CDCl}_3$ )  $\delta$  8.10–8.07 (m, 2H), 7.62–7.59 (m, 2H), 7.58–7.53 (m, 1H), 7.44–7.41 (m, 2H), 7.33–7.30 (m, 3H), 5.11 (dd,  $J$  = 9.6, 3.0 Hz, 1H, *H*-3), 4.65 (d,  $J$  = 9.6 Hz, 1H, *H*-1), 4.35 (br, 1H, *H*-4), 4.09 (t,  $J$  = 9.6 Hz, 1H, *H*-2), 4.00 (dd,  $J$  = 10.8, 5.0 Hz, 1H, *H*-6), 3.93 (dd,  $J$  = 10.8, 4.3 Hz, 1H, *H*-6), 3.65–3.63 (m, 1H, *H*-5), 3.15 (br, 1H, *OH*-4), 2.54 (br, 1H, *OH*-2), 0.91 (s, 9H), 0.12 (s, 3H), 0.10 (s, 3H);  $^{13}\text{C}$  NMR (100 MHz,  $\text{CDCl}_3$ )  $\delta$  166.3, 133.3, 132.7, 131.8, 129.9, 129.6, 129.0, 128.4, 128.1, 89.0, 77.6, 77.1, 68.7, 67.2, 63.6, 25.8, 18.2, –5.51, –5.53; IR (KBr)  $\nu$  = 3512, 2928, 2856, 1703, 1279, 1104, 1071, 839, 778, 743, 714, 689  $\text{cm}^{-1}$ ; HRMS (ESI)  $m/z$  calcd for  $\text{C}_{25}\text{H}_{34}\text{NaO}_6\text{SSi}$   $[\text{M}+\text{Na}]^+$  513.1743, found 513.1736.



Methyl 6-((*tert*-butyldimethylsilyl)oxy)-3-*O*-benzoyl- $\alpha$ -D-mannopyranoside (**3g**)<sup>6</sup>

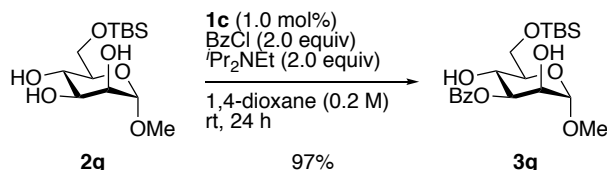

Benzoyl chloride (46.9  $\mu\text{L}$ , 0.400 mmol, 2.0 equiv) was added to a stirred mixture of methyl 6-((*tert*-butyldimethylsilyl)oxy)- $\alpha$ -D-mannopyranoside (**2g**) (61.7 mg, 0.200 mmol, 1.0 equiv), boronic acid **1c** (0.002 M in 1,4-dioxane, 1.00 mL, 2.00  $\mu\text{mol}$ , 1.0 mol%) and *N,N*-diisopropylethylamine (69.6  $\mu\text{L}$ , 0.400 mmol, 2.0 equiv) under ambient atmosphere. After stirring for 24 hours, the resulting mixture was diluted with chloroform and washed with 1 M HCl, sat.  $\text{NaHCO}_3$  aq., water and brine, dried over  $\text{Na}_2\text{SO}_4$ , filtered, and concentrated *in vacuo*. The resulting crude material was purified by silica gel chromatography (hexane : ethyl acetate = 4 : 1) to give **3g** (79.6 mg, 0.193 mmol, 97%) as a colorless oil.

Data for **3g**:  $R_f$  = 0.25 (4/1 *n*-hexane / EtOAc);  $[\alpha]_D^{24} +31.7^\circ$  ( $c$  = 1.0,  $\text{CHCl}_3$ );  $^1\text{H}$  NMR (400 MHz,  $\text{CDCl}_3$ )  $\delta$  8.11–8.08 (m, 2H), 7.59–7.54 (m, 1H), 7.46–7.42 (m, 2H), 5.34 (dd,  $J$  = 9.8, 3.3 Hz, 1H, *H*-3), 4.74 (d,  $J$  = 1.8 Hz, 1H, *H*-1), 4.13 (t,  $J$  = 9.8 Hz, 1H, *H*-4), 4.13 (dd,  $J$  = 3.3, 1.8 Hz, 1H, *H*-2), 3.96 (dd,  $J$  = 10.6, 5.0 Hz, 1H, *H*-6), 3.92 (dd,  $J$  = 10.6, 5.3 Hz, 1H, *H*-6), 3.75–3.71 (m, 1H, *H*-5), 3.42 (s, 3H), 0.91 (s, 9H), 0.11 (s, 3H), 0.11 (s, 3H);  $^{13}\text{C}$  NMR (100 MHz,  $\text{CDCl}_3$ )  $\delta$  166.5, 133.3, 129.9, 129.7, 128.4, 100.6, 75.0, 71.4, 69.2, 68.0, 64.4, 55.0, 25.9, 18.3, –5.47; IR (neat)  $\nu$  = 3478, 2929, 2857, 1703, 1603, 1452, 1281, 1109, 973, 838, 758, 713, 668  $\text{cm}^{-1}$ ; HRMS (ESI)  $m/z$  calcd for  $\text{C}_{20}\text{H}_{32}\text{NaO}_7\text{Si}$   $[\text{M}+\text{Na}]^+$  435.1815, found 435.1809.

Methyl 6-((*tert*-butyldimethylsilyl)oxy)-2-*O*-benzoyl- $\alpha$ -D-mannopyranoside (**SI-4**)

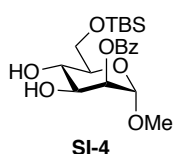

Data for **SI-4**: colorless oil;  $R_f$  = 0.28 (2/1 *n*-hexane / EtOAc);  $[\alpha]_D^{24} +11.8^\circ$  ( $c$  = 1.0,  $\text{CH}_3\text{OH}$ );  $^1\text{H}$  NMR (400 MHz,  $\text{CDCl}_3$ )  $\delta$  8.06–8.03 (m, 2H), 7.59–7.55 (m, 1H), 7.45–7.41 (m, 2H), 5.33 (dd,  $J$  = 3.6, 1.6 Hz, 1H, *H*-2), 4.82 (d,  $J$  = 1.6 Hz, 1H, *H*-1), 4.12 (dd,  $J$  = 9.6, 3.6 Hz, 1H, *H*-3), 3.99 (t,  $J$  = 9.6 Hz, 1H, *H*-4), 3.97 (dd,  $J$  = 10.8, 4.8 Hz, 1H, *H*-6), 3.89 (dd,  $J$  = 10.8, 4.8 Hz, 1H, *H*-6), 3.66 (dt,  $J$  = 9.6, 4.8 Hz, 1H, *H*-5), 3.40 (s, 3H), 0.93 (s, 9H), 0.12 (s, 6H);  $^{13}\text{C}$  NMR (100 MHz,  $\text{CDCl}_3$ )  $\delta$  166.2, 133.3, 129.9, 129.6, 128.4, 98.7, 72.2, 71.0, 70.4, 70.2, 64.1, 55.1, 25.9, 18.3, –5.43, –5.48; IR (neat)  $\nu$  = 3429, 2954, 2929, 2856, 1724, 1603, 1452, 1363, 1272, 1116, 1072, 972, 837, 778, 711, 685  $\text{cm}^{-1}$ ; HRMS (ESI)  $m/z$  calcd for  $\text{C}_{20}\text{H}_{32}\text{NaO}_7\text{Si}$   $[\text{M}+\text{Na}]^+$  435.1815, found 435.1806.

Methyl 3-*O*-benzoyl- $\alpha$ -L-rhamnopyranoside (**3h**)<sup>6</sup>

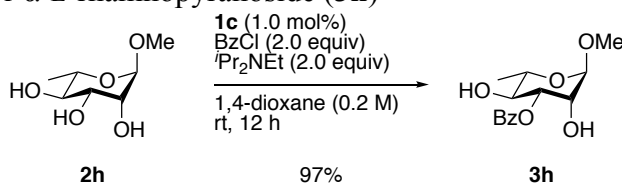

Benzoyl chloride (46.9  $\mu\text{L}$ , 0.400 mmol, 2.0 equiv) was added to a stirred mixture of methyl  $\alpha$ -L-rhamnopyranoside (**2h**) (35.6 mg, 0.200 mmol, 1.0 equiv), boronic acid **1c** (0.002 M in 1,4-dioxane, 1.00 mL, 2.00  $\mu\text{mol}$ , 1.0 mol%) and *N,N*-diisopropylethylamine (69.6  $\mu\text{L}$ , 0.400 mmol, 2.0 equiv) under ambient atmosphere. After stirring for 12 hours, the reaction was quenched by addition of 1 M HCl (2.0 mL) and the resulting mixture was extracted two times with ethyl acetate. The combined organic layers were washed with sat.  $\text{NaHCO}_3$  aq., water and brine, dried over  $\text{Na}_2\text{SO}_4$ , filtered, and concentrated *in vacuo*. The resulting crude material was purified by silica gel chromatography (chloroform : methanol = 100 : 1) to give **3h** (54.8 mg, 0.194 mmol, 97%) as a white solid.

Data for **3h**:  $R_f$  = 0.37 (20/1  $\text{CHCl}_3$  /  $\text{MeOH}$ ); mp 68–71  $^\circ\text{C}$ ;  $[\alpha]_{\text{D}}^{23}$   $-52.8^\circ$  ( $c$  = 1.0,  $\text{CHCl}_3$ );  $^1\text{H}$  NMR (400 MHz,  $\text{CDCl}_3$ )  $\delta$  8.08 (br d,  $J$  = 7.8 Hz, 2H), 7.60–7.56 (m, 1H), 7.44 (br t,  $J$  = 7.8 Hz, 2H), 5.26 (dd,  $J$  = 9.5, 3.2 Hz, 1H, *H*-3), 4.70 (d,  $J$  = 1.7 Hz, 1H, *H*-1), 4.14 (br, dd,  $J$  = 3.2, 1.7 Hz, 1H, *H*-2), 3.79–3.76 (m, 2H, *H*-4, *H*-5), 3.40 (s, 3H), 2.47 (br, 1H, OH), 2.28 (br, 1H, OH), 1.29 (d,  $J$  = 6.4 Hz, 3H, *H*-6);  $^{13}\text{C}$  NMR (100 MHz,  $\text{CDCl}_3$ )  $\delta$  166.9, 133.5, 129.8, 129.5, 128.5, 100.6, 75.5, 71.4, 69.7, 68.4, 55.0, 17.6; IR (KBr)  $\nu$  = 3423, 2979, 2938, 1709, 1452, 1319, 1282, 1130, 1056, 986, 806, 716  $\text{cm}^{-1}$ ; HRMS (ESI)  $m/z$  calcd for  $\text{C}_{14}\text{H}_{18}\text{NaO}_6$   $[\text{M}+\text{Na}]^+$  305.1001, found 305.0993.

Methyl 2-*O*-benzoyl- $\alpha$ -L-rhamnopyranoside (**SI-5**)

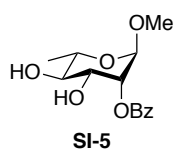

Data for **SI-5**: colorless oil;  $R_f$  = 0.34 (20/1  $\text{CHCl}_3$  /  $\text{MeOH}$ );  $[\alpha]_{\text{D}}^{25}$   $+6.7^\circ$  ( $c$  = 1.0,  $\text{CHCl}_3$ );  $^1\text{H}$  NMR (400 MHz,  $\text{CDCl}_3$ )  $\delta$  8.03 (d,  $J$  = 7.6 Hz, 2H), 7.58 (t,  $J$  = 7.6 Hz, 1H), 7.44 (t,  $J$  = 7.6 Hz, 2H), 5.32–5.31 (m, 1H, *H*-2), 4.76 (br, 1H, *H*-1), 4.04 (dd,  $J$  = 9.2, 3.2 Hz, 1H, *H*-3), 3.76–3.69 (m, 1H, *H*-5), 3.59 (t,  $J$  = 9.2 Hz, 1H, *H*-4), 3.40 (s, 3H), 2.64 (br, 2H, OH-2, OH-4), 1.37 (d,  $J$  = 6.0 Hz, 3H, *H*-6);  $^{13}\text{C}$  NMR (100 MHz,  $\text{CDCl}_3$ )  $\delta$  166.4, 133.5, 129.9, 129.5, 128.5, 98.6, 73.7, 72.9, 70.6, 67.9, 55.0, 17.6; IR (neat)  $\nu$  = 3438, 2930, 1719, 1452, 1359, 1277, 1135, 1118, 1078, 995, 887, 765, 714  $\text{cm}^{-1}$ ; HRMS (ESI)  $m/z$  calcd for  $\text{C}_{14}\text{H}_{18}\text{NaO}_6$   $[\text{M}+\text{Na}]^+$  305.1001, found 305.1002.

### Methyl 3-*O*-benzoyl- $\beta$ -L-arabinopyranoside (**3i**)<sup>6</sup>

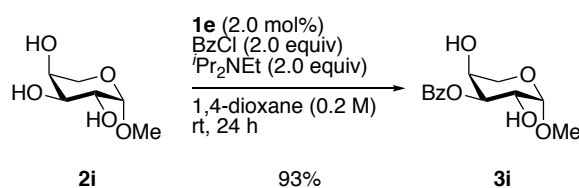

Benzoyl chloride (46.9  $\mu\text{L}$ , 0.400 mmol, 2.0 equiv) was added to a stirred mixture of methyl  $\beta$ -L-arabinopyranoside (**2i**) (32.8 mg, 0.200 mmol, 1.0 equiv), boronic acid **1e** (0.004 M in 1,4-dioxane, 1.00 mL, 4.00  $\mu\text{mol}$ , 2.0 mol%) and *N,N*-diisopropylethylamine (69.6  $\mu\text{L}$ , 0.400 mmol, 2.0 equiv) under ambient atmosphere. After stirring for 24 hours, the reaction was quenched by addition of 1 M HCl (2.0 mL) and the resulting mixture was extracted two times with ethyl acetate. The combined organic layers were washed with sat.  $\text{NaHCO}_3$  aq., water and brine, dried over  $\text{Na}_2\text{SO}_4$ , filtered, and concentrated *in vacuo*. The resulting crude material was purified by silica gel chromatography (chloroform : methanol = 100 : 1) to give **3i** (49.9 mg, 0.186 mmol, 93%) as a colorless oil.

Data for **3i**:  $R_f$  = 0.32 (20/1  $\text{CHCl}_3$  /  $\text{MeOH}$ );  $[\alpha]_D^{24}$  +214.8° ( $c$  = 1.0,  $\text{CHCl}_3$ );  $^1\text{H}$  NMR (400 MHz,  $\text{CDCl}_3$ )  $\delta$  8.10–8.07 (m, 2H), 7.60–7.55 (m, 1H), 7.46–7.43 (m, 2H), 5.30 (dd,  $J$  = 10.4, 3.2 Hz, 1H, *H*-3), 4.86 (d,  $J$  = 4.0 Hz, 1H, *H*-1), 4.17 (br, 1H, *H*-4), 4.14 (dd,  $J$  = 10.4, 4.0 Hz, 1H, *H*-2), 3.90 (br d,  $J$  = 12.4 Hz, 1H, *H*-5), 3.73 (dd,  $J$  = 12.4, 2.4 Hz, 1H, *H*-5), 3.47 (s, 3H), 2.32 (br, 1H, *OH*), 2.16 (br, 1H, *OH*);  $^{13}\text{C}$  NMR (100 MHz,  $\text{CDCl}_3$ )  $\delta$  166.3, 133.4, 129.8, 129.6, 128.4, 100.1, 73.6, 68.2, 67.5, 62.3, 55.6; IR (neat)  $\nu$  = 3454, 2934, 1717, 1452, 1317, 1282, 1142, 1065, 1034, 995, 765, 715  $\text{cm}^{-1}$ ; HRMS (ESI)  $m/z$  calcd for  $\text{C}_{13}\text{H}_{16}\text{NaO}_6$   $[\text{M}+\text{Na}]^+$  291.0845, found 291.0842.

### Methyl 4-*O*-benzoyl- $\beta$ -L-arabinopyranoside (**SI-6**)

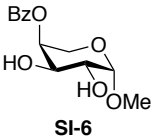 Data for **SI-6**: colorless oil;  $R_f$  = 0.28 (20/1  $\text{CHCl}_3$  /  $\text{MeOH}$ );  $[\alpha]_D^{24}$  +181.8° ( $c$  = 1.0,  $\text{CHCl}_3$ );  $^1\text{H}$  NMR (400 MHz,  $\text{CDCl}_3$ )  $\delta$  8.07–8.05 (m, 2H), 7.59–7.55 (m, 1H), 7.46–7.42 (m, 2H), 5.39–5.38 (m, 1H, *H*-4), 4.86 (d,  $J$  = 3.6 Hz, 1H, *H*-1), 4.04 (dd,  $J$  = 9.6, 3.6 Hz, 1H, *H*-3), 3.97 (dd,  $J$  = 9.6, 3.6 Hz, 1H, *H*-2), 3.90 (br d,  $J$  = 12.8 Hz, 1H, *H*-5), 3.84 (dd,  $J$  = 12.8, 2.0 Hz, 1H, *H*-5), 3.45 (s, 3H), 2.55 (br, 2H, *OH*-2, *OH*-3);  $^{13}\text{C}$  NMR (100 MHz,  $\text{CDCl}_3$ )  $\delta$  166.4, 133.3, 129.8, 128.4, 99.7, 71.9, 70.1, 69.2, 60.7, 55.7; IR (neat)  $\nu$  = 3438, 2933, 1722, 1452, 1376, 1274, 1118, 1071, 1027, 974, 713  $\text{cm}^{-1}$ ; HRMS (ESI)  $m/z$  calcd for  $\text{C}_{13}\text{H}_{16}\text{NaO}_6$   $[\text{M}+\text{Na}]^+$  291.0845, found 291.0846.

6-((*tert*-butyldimethylsilyl)oxy)-3-*O*-benzoyl-D-galactal (**3j**)

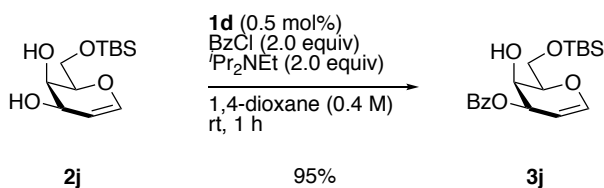

Benzoyl chloride (46.9  $\mu\text{L}$ , 0.400 mmol, 2.0 equiv) was added to a stirred mixture of phenyl 6-((*tert*-butyldimethylsilyl)oxy)-D-galactal (**2j**) (52.1 mg, 0.200 mmol, 1.0 equiv), boronic acid **1d** (0.002 M in 1,4-dioxane, 500  $\mu\text{L}$ , 1.00  $\mu\text{mol}$ , 0.5 mol%) and *N,N*-diisopropylethylamine (69.6  $\mu\text{L}$ , 0.400 mmol, 2.0 equiv) under ambient atmosphere. After stirring for 1 hour, the resulting mixture was diluted with chloroform and washed with 1 M HCl, sat.  $\text{NaHCO}_3$  aq., water and brine, dried over  $\text{Na}_2\text{SO}_4$ , filtered, and concentrated *in vacuo*. The resulting crude material was purified by silica gel chromatography (hexane : ethyl acetate = 15 : 1) to give **3j** (69.2 mg, 0.0190 mmol, 95%) as a colorless oil.

Data for **3j**:  $R_f$  = 0.18 (10/1 *n*-hexane / EtOAc);  $[\alpha]_{\text{D}}^{23}$   $-67.6^\circ$  ( $c$  = 1.0,  $\text{CHCl}_3$ );  $^1\text{H}$  NMR (400 MHz,  $\text{CDCl}_3$ )  $\delta$  8.09–8.07 (m, 2H), 7.58–7.55 (m, 1H), 7.46–7.42 (m, 2H), 6.52 (dd,  $J$  = 6.0, 2.0 Hz, 1H, *H*-1), 5.68 (dt,  $J$  = 4.0, 2.0 Hz, 1H, *H*-3), 4.81 (dt,  $J$  = 6.0, 2.0 Hz, 1H, *H*-2), 4.41 (br, 1H, *H*-4), 4.08–4.02 (m, 2H, *H*-5, *H*-6), 3.92 (dd,  $J$  = 9.6, 3.6 Hz, 1H, *H*-6), 2.94 (d,  $J$  = 3.6, 1H, *OH*-4), 0.91 (s, 9H), 0.11 (s, 6H);  $^{13}\text{C}$  NMR (100 MHz,  $\text{CDCl}_3$ )  $\delta$  166.2, 146.1, 133.2, 129.9, 129.8, 128.4, 98.6, 75.9, 68.1, 64.1, 62.9, 25.8, 18.3,  $-5.48$ ,  $-5.50$ ; IR (neat)  $\nu$  = 3493, 2929, 2885, 2857, 1720, 1644, 1603, 1471, 1452, 1273, 1110, 1028, 839, 779, 713, 549, 496  $\text{cm}^{-1}$ ; HRMS (ESI)  $m/z$  calcd for  $\text{C}_{19}\text{H}_{28}\text{NaO}_5\text{Si}$   $[\text{M}+\text{Na}]^+$  387.1604, found 387.1595.

## 8. Boronic acid catalyzed site-selective mono-acylations of **2a** (Scheme 3)

### Methyl 3-*O*-4-methoxybenzoyl- $\alpha$ -L-fucopyranoside (**3k**)

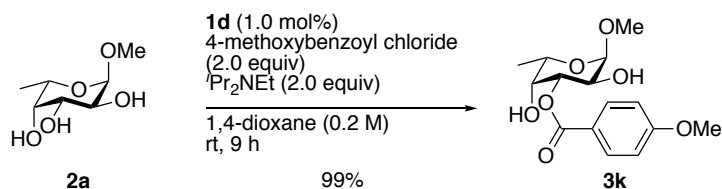

4-Methoxybenzoyl chloride (54.2  $\mu\text{L}$ , 0.400 mmol, 2.0 equiv) was added to a stirred mixture of methyl  $\alpha$ -L-fucopyranoside (**2a**) (35.6 mg, 0.200 mmol, 1.0 equiv), boronic acid **1d** (0.002 M in 1,4-dioxane, 1.00 mL, 2.00  $\mu\text{mol}$ , 1.0 mol%) and *N,N*-diisopropylethylamine (69.6  $\mu\text{L}$ , 0.400 mmol, 2.0 equiv) under ambient atmosphere. After stirring for 9 hours, the reaction was quenched by addition of 1 M HCl (2.0 mL) and the resulting mixture was extracted two times with ethyl acetate. The combined organic layers were washed with sat.  $\text{NaHCO}_3$  aq., water and brine, dried over  $\text{Na}_2\text{SO}_4$ , filtered, and concentrated *in vacuo*. The resulting crude material was purified by silica gel chromatography (chloroform : methanol = 100 : 1) to give **3k** (61.8 mg, 0.198 mmol, 99%) as a white solid.

Data for **3k**:  $R_f$  = 0.39 (20/1  $\text{CHCl}_3$  / MeOH); mp 88-92  $^\circ\text{C}$ ;  $[\alpha]_{\text{D}}^{23}$   $-163.2^\circ$  ( $c$  = 1.0,  $\text{CHCl}_3$ );  $^1\text{H}$  NMR (400 MHz,  $\text{CDCl}_3$ )  $\delta$  8.03 (dt,  $J$  = 9.6, 2.8 Hz, 2H), 6.90 (dt,  $J$  = 9.6, 2.8 Hz, 2H), 5.24 (dd,  $J$  = 10.4, 3.2 Hz, 1H, *H*-3), 4.82 (d,  $J$  = 4.0 Hz, 1H, *H*-1), 4.11 (dd,  $J$  = 10.4, 4.0 Hz, 1H, *H*-2), 4.05 (q,  $J$  = 6.8 Hz, 1H, *H*-5), 3.96 (d,  $J$  = 3.2 Hz, 1H, *H*-4), 3.85 (s, 3H), 3.45 (s, 3H), 2.22 (br, 2H, *OH*-2, *OH*-4), 1.29 (d,  $J$  = 6.8 Hz, 3H, *H*-6);  $^{13}\text{C}$  NMR (100 MHz,  $\text{CDCl}_3$ )  $\delta$  166.1, 163.6, 131.9, 122.0, 113.7, 99.7, 74.2, 70.9, 67.1, 65.7, 55.5, 55.4, 16.0; IR (KBr)  $\nu$  = 3338, 2993, 2942, 2842, 1694, 1606, 1579, 1514, 1421, 1364, 1286, 1265, 1169, 1129, 1044, 963, 842, 770, 683, 615, 500  $\text{cm}^{-1}$ ; HRMS (ESI)  $m/z$  calcd for  $\text{C}_{15}\text{H}_{20}\text{NaO}_7$   $[\text{M}+\text{Na}]^+$  335.1107, found 335.1094.

### Methyl 3-*O*-4-methylbenzoyl- $\alpha$ -L-fucopyranoside (**3I**)

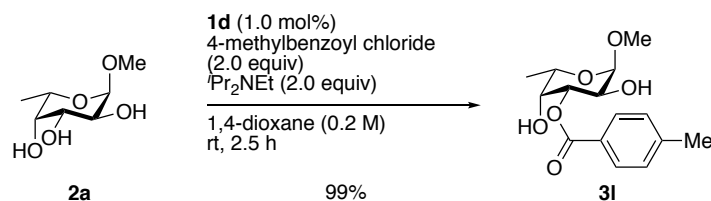

4-Methylbenzoyl chloride (52.9  $\mu\text{L}$ , 0.400 mmol, 2.0 equiv) was added to a stirred mixture of methyl  $\alpha$ -L-fucopyranoside (**2a**) (35.6 mg, 0.200 mmol, 1.0 equiv), boronic acid **1d** (0.002 M in 1,4-dioxane, 1.00 mL, 2.00  $\mu\text{mol}$ , 1.0 mol%) and *N,N*-diisopropylethylamine (69.6  $\mu\text{L}$ , 0.400 mmol, 2.0 equiv) under ambient atmosphere. After stirring for 2.5 hours, the reaction was quenched by addition of 1 M HCl (2.0 mL) and the resulting mixture was extracted two times with ethyl acetate. The combined organic layers were washed with sat.  $\text{NaHCO}_3$  aq., water and brine, dried over  $\text{Na}_2\text{SO}_4$ , filtered, and concentrated *in vacuo*. The resulting crude material was purified by silica gel chromatography (chloroform : methanol = 100 : 1) to give **3I** (58.7 mg, 0.198 mmol, 99%) as a white solid.

Data for **3I**:  $R_f$  = 0.39 (20/1  $\text{CHCl}_3$  /  $\text{MeOH}$ ); mp 108-111  $^\circ\text{C}$ ;  $[\alpha]_D^{23}$   $-175.8^\circ$  ( $c$  = 1.0,  $\text{CHCl}_3$ );  $^1\text{H}$  NMR (400 MHz,  $\text{CDCl}_3$ )  $\delta$  7.97 (d,  $J$  = 8.4 Hz, 2H), 7.23 (d,  $J$  = 8.4 Hz, 2H), 5.26 (dd,  $J$  = 10.4, 3.2 Hz, 1H, *H*-3), 4.83 (d,  $J$  = 4.0 Hz, 1H, *H*-1), 4.12 (dd,  $J$  = 10.4, 4.0 Hz, 1H, *H*-2), 4.05 (dq,  $J$  = 6.8, 0.8 Hz, 1H, *H*-5), 3.96 (dd,  $J$  = 3.2, 0.8 Hz, 1H, *H*-4), 3.45 (s, 3H), 2.40 (s, 3H), 2.09 (br, 2H, *OH*-2, *OH*-4), 1.30 (d,  $J$  = 6.8 Hz, 3H, *H*-6);  $^{13}\text{C}$  NMR (100 MHz,  $\text{CDCl}_3$ )  $\delta$  166.5, 144.1, 129.9, 129.1, 126.9, 99.7, 74.3, 70.9, 67.1, 65.7, 55.5, 21.7, 16.0; IR (KBr)  $\nu$  = 3380, 2992, 2979, 2938, 1705, 1638, 1612, 1449, 1365, 1282, 1181, 1125, 1036, 963, 845, 761, 681, 640  $\text{cm}^{-1}$ ; HRMS (ESI)  $m/z$  calcd for  $\text{C}_{15}\text{H}_{20}\text{NaO}_6$   $[\text{M}+\text{Na}]^+$  319.1158, found 319.1148.

Methyl 3-*O*-4-chlorobenzoyl- $\alpha$ -L-fucopyranoside (**3m**)

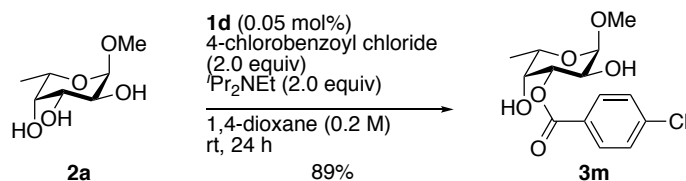

4-Chlorobenzoyl chloride (51.1  $\mu\text{L}$ , 0.400 mmol, 2.0 equiv) was added to a stirred solution of methyl  $\alpha$ -L-fucopyranoside (**2a**) (35.6 mg, 0.200 mmol, 1.0 equiv), boronic acid **1d** (0.002 M in 1,4-dioxane, 50.0  $\mu\text{L}$ , 0.100  $\mu\text{mol}$ , 0.05 mol%) and *N,N*-diisopropylethylamine (69.6  $\mu\text{L}$ , 0.400 mmol, 2.0 equiv) in dry 1,4-dioxane (950  $\mu\text{L}$ , total 0.20 M) under ambient atmosphere. After stirring for 24 hours, the reaction was quenched by addition of 1 M HCl (2.0 mL) and the resulting mixture was extracted two times with ethyl acetate. The combined organic layers were washed with sat.  $\text{NaHCO}_3$  aq., water and brine, dried over  $\text{Na}_2\text{SO}_4$ , filtered, and concentrated *in vacuo*. The resulting crude material was purified by silica gel chromatography (chloroform : methanol = 100 : 1) to give **3m** (56.4 mg, 0.178 mmol, 89%) as a white solid.

Data for **3m**:  $R_f$  = 0.39 (20/1  $\text{CHCl}_3$  /  $\text{MeOH}$ ); mp 134-137  $^\circ\text{C}$ ;  $[\alpha]_{\text{D}}^{23}$   $-175.2^\circ$  ( $c$  = 1.0,  $\text{CHCl}_3$ );  $^1\text{H}$  NMR (400 MHz,  $\text{CDCl}_3$ )  $\delta$  8.02 (d,  $J$  = 8.4 Hz, 2H), 7.41 (d,  $J$  = 8.4 Hz, 2H), 5.25 (dd,  $J$  = 10.0, 2.8 Hz, 1H, *H*-3), 4.83 (d,  $J$  = 3.6 Hz, 1H, *H*-1), 4.11 (dd,  $J$  = 10.0, 3.6 Hz, 1H, *H*-2), 4.06 (q,  $J$  = 6.4 Hz, 1H, *H*-5), 3.97 (d,  $J$  = 2.8 Hz, 1H, *H*-4), 3.46 (s, 3H), 2.08 (br, 2H, *OH*-2, *OH*-4), 1.30 (d,  $J$  = 6.4 Hz, 3H, *H*-6);  $^{13}\text{C}$  NMR (100 MHz,  $\text{CDCl}_3$ )  $\delta$  165.6, 139.8, 131.2, 128.8, 128.2, 99.7, 74.8, 70.8, 67.1, 65.7, 55.6, 16.0; IR (KBr)  $\nu$  = 3512, 3435, 2982, 2941, 2923, 2835, 1708, 1594, 1400, 1359, 1312, 1279, 1091, 1052, 959, 850, 761, 679  $\text{cm}^{-1}$ ; HRMS (ESI)  $m/z$  calcd for  $\text{C}_{14}\text{H}_{17}\text{ClNaO}_6$   $[\text{M}+\text{Na}]^+$  339.0611, found 339.0603.

Methyl 3-*O*-4-trifluoromethylbenzoyl- $\alpha$ -L-fucopyranoside (**3n**)

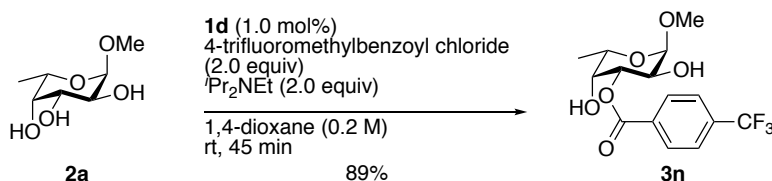

4-Trifluoromethylbenzoyl chloride (59.2  $\mu\text{L}$ , 0.400 mmol, 2.0 equiv) was added to a stirred mixture of methyl  $\alpha$ -L-fucopyranoside (**2a**) (35.6 mg, 0.200 mmol, 1.0 equiv), boronic acid **1d** (0.002 M in 1,4-dioxane, 1.00 mL, 2.00  $\mu\text{mol}$ , 1.0 mol%) and *N,N*-diisopropylethylamine (69.6  $\mu\text{L}$ , 0.400 mmol, 2.0 equiv) under ambient atmosphere. After stirring for 45 minutes, the reaction was quenched by addition of 1 M HCl (2.0 mL) and the resulting mixture was extracted two times with ethyl acetate. The combined organic layers were washed with sat.  $\text{NaHCO}_3$  aq., water and brine, dried over  $\text{Na}_2\text{SO}_4$ , filtered, and concentrated *in vacuo*. The resulting crude material was purified by silica gel chromatography (chloroform : methanol = 100 : 1) to give **3n** (62.5 mg, 0.178 mmol, 89%) as a white solid.

Data for **3n**:  $R_f$  = 0.39 (20/1  $\text{CHCl}_3$  /  $\text{MeOH}$ ); mp 121-124  $^\circ\text{C}$ ;  $[\alpha]_{\text{D}}^{23}$   $-157.9^\circ$  ( $c$  = 1.0,  $\text{CHCl}_3$ );  $^1\text{H}$  NMR (400 MHz,  $\text{CDCl}_3$ )  $\delta$  8.21 (d,  $J$  = 8.4 Hz, 2H), 7.71 (d,  $J$  = 8.4 Hz, 2H), 5.29 (dd,  $J$  = 10.0, 2.8 Hz, 1H, *H*-3), 4.85 (d,  $J$  = 4.0 Hz, 1H, *H*-1), 4.13 (dd,  $J$  = 10.0, 4.0 Hz, 1H, *H*-2), 4.08 (q,  $J$  = 6.8 Hz, 1H, *H*-5), 3.99 (d,  $J$  = 2.8 Hz, 1H, *H*-4), 3.47 (s, 3H), 2.04 (br, 2H, *OH*-2, *OH*-4), 1.31 (d,  $J$  = 6.8 Hz, 3H, *H*-6);  $^{13}\text{C}$  NMR (100 MHz,  $\text{CDCl}_3$ )  $\delta$  165.2, 134.8 (q,  $^2J_{\text{C-F}}$  = 32.5 Hz), 133.0 (q,  $^4J_{\text{C-F}}$  = 1.3 Hz), 130.3, 125.5 (q,  $^3J_{\text{C-F}}$  = 3.9 Hz), 123.5 (q,  $^1J_{\text{C-F}}$  = 271.6 Hz), 99.6, 75.2, 70.8, 67.1, 65.8, 55.6, 16.0; IR (KBr)  $\nu$  = 3529, 3430, 2934, 1709, 1414, 1335, 1290, 1168, 1121, 1054, 961, 866, 776, 752, 709  $\text{cm}^{-1}$ ; HRMS (ESI)  $m/z$  calcd for  $\text{C}_{15}\text{H}_{17}\text{F}_3\text{NaO}_6$   $[\text{M}+\text{Na}]^+$  373.0875, found 373.0859.



Methyl 3-*O*-4-nitrobenzoyl- $\alpha$ -L-fucopyranoside (**3o**)

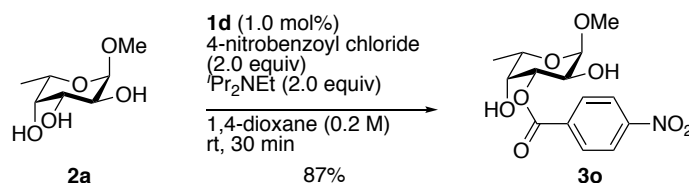

4-Nitrobenzoyl chloride (74.2 mg, 0.400 mmol, 2.0 equiv) was added to a stirred mixture of methyl  $\alpha$ -L-fucopyranoside (**2a**) (35.6 mg, 0.200 mmol, 1.0 equiv), boronic acid **1d** (0.002 M in 1,4-dioxane, 1.00 mL, 2.00  $\mu\text{mol}$ , 1.0 mol%) and *N,N*-diisopropylethylamine (69.6  $\mu\text{L}$ , 0.400 mmol, 2.0 equiv) under ambient atmosphere. After stirring for 30 minutes, the reaction was quenched by addition of 1 M HCl (2.0 mL) and the resulting mixture was extracted two times with ethyl acetate. The combined organic layers were washed with sat.  $\text{NaHCO}_3$  aq., water and brine, dried over  $\text{Na}_2\text{SO}_4$ , filtered, and concentrated *in vacuo*. The resulting crude material was purified by silica gel chromatography (chloroform : methanol = 100 : 1) to give **3o** (56.7 mg, 0.173 mmol, 87%) as a white solid.

Data for **3o**:  $R_f$  = 0.37 (20/1  $\text{CHCl}_3$  /  $\text{MeOH}$ ); mp 133-136  $^\circ\text{C}$ ;  $[\alpha]_{\text{D}}^{23}$   $-185.2^\circ$  ( $c$  = 1.0,  $\text{CHCl}_3$ );  $^1\text{H}$  NMR (400 MHz,  $\text{CDCl}_3$ )  $\delta$  8.29–8.24 (m, 4H), 5.29 (dd,  $J$  = 10.4, 3.2 Hz, 1H, *H*-3), 4.85 (d,  $J$  = 4.0 Hz, 1H, *H*-1), 4.13 (dd,  $J$  = 10.4, 4.0 Hz, 1H, *H*-2), 4.09 (q,  $J$  = 6.8 Hz, 1H, *H*-5), 3.99 (d,  $J$  = 3.2 Hz, 1H, *H*-4), 3.48 (s, 3H), 2.05 (br, 2H, OH-2, OH-4), 1.31 (d,  $J$  = 6.8 Hz, 3H, *H*-6);  $^{13}\text{C}$  NMR (100 MHz,  $\text{CDCl}_3$ )  $\delta$  164.6, 150.7, 135.2, 131.0, 123.5, 99.6, 75.6, 70.8, 67.0, 65.8, 55.6, 16.0; IR (KBr)  $\nu$  = 3524, 3434, 2984, 2942, 2839, 1708, 1608, 1525, 1352, 1306, 1282, 1129, 1090, 1048, 959, 863, 759, 719, 684  $\text{cm}^{-1}$ ; HRMS (ESI)  $m/z$  calcd for  $\text{C}_{14}\text{H}_{17}\text{NNaO}_8$   $[\text{M}+\text{Na}]^+$  350.0852, found 350.0847.

Methyl 3-*O*-2-methylbenzoyl- $\alpha$ -L-fucopyranoside (**3p**)

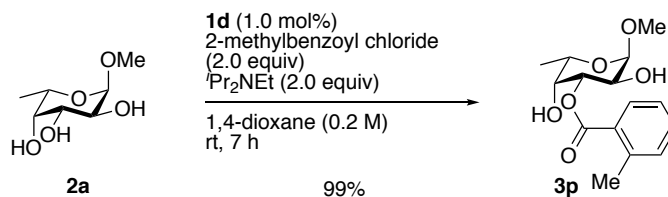

2-Methylbenzoyl chloride (52.0  $\mu\text{L}$ , 0.400 mmol, 2.0 equiv) was added to a stirred mixture of methyl  $\alpha$ -L-fucopyranoside (**2a**) (35.6 mg, 0.200 mmol, 1.0 equiv), boronic acid **1d** (0.002 M in 1,4-dioxane, 1.00 mL, 2.00  $\mu\text{mol}$ , 1.0 mol%) and *N,N*-diisopropylethylamine (69.6  $\mu\text{L}$ , 0.400 mmol, 2.0 equiv) under ambient atmosphere. After stirring for 7 hours, the reaction was quenched by addition of 1 M HCl (2.0 mL) and the resulting mixture was extracted two times with ethyl acetate. The combined organic layers were washed with sat.  $\text{NaHCO}_3$  aq., water and brine, dried over  $\text{Na}_2\text{SO}_4$ , filtered, and concentrated *in vacuo*. The resulting crude material was purified by silica gel chromatography (chloroform : methanol = 100 : 1) to give **3p** (58.7 mg, 0.198 mmol, 99%) as a white solid.

Data for **3p**:  $R_f$  = 0.39 (20/1  $\text{CHCl}_3$  /  $\text{MeOH}$ ); mp 94-97  $^\circ\text{C}$ ;  $[\alpha]_{\text{D}}^{23}$   $-175.9^\circ$  ( $c$  = 1.0,  $\text{CHCl}_3$ );  $^1\text{H}$  NMR (400 MHz,  $\text{CDCl}_3$ )  $\delta$  7.98–7.96 (m, 1H), 7.44–7.39 (m, 1H), 7.27–7.24 (m, 2H), 5.29 (dd,  $J$  = 10.4, 3.2 Hz, 1H, *H*-3), 4.84 (d,  $J$  = 4.0 Hz, 1H, *H*-1), 4.11 (dd,  $J$  = 10.4, 4.0 Hz, 1H, *H*-2), 4.08 (q,  $J$  = 6.8 Hz, 1H, *H*-5), 3.99 (d,  $J$  = 3.2 Hz, 1H, *H*-4), 3.47 (s, 3H), 2.61 (s, 3H), 1.94 (br, 2H, *OH*-2, *OH*-4), 1.31 (d,  $J$  = 6.8 Hz, 3H, *H*-6);  $^{13}\text{C}$  NMR (100 MHz,  $\text{CDCl}_3$ )  $\delta$  167.4, 140.3, 132.3, 131.7, 130.7, 129.3, 125.8, 99.7, 74.3, 70.9, 67.2, 65.7, 55.6, 21.7, 16.0; IR (KBr)  $\nu$  = 3491, 2993, 2920, 2831, 1693, 1601, 1443, 1358, 1303, 1270, 1192, 1144, 1093, 1046, 959, 754, 740  $\text{cm}^{-1}$ ; HRMS (ESI)  $m/z$  calcd for  $\text{C}_{15}\text{H}_{20}\text{NaO}_6$   $[\text{M}+\text{Na}]^+$  319.1158, found 319.1148.

### Methyl 3-*O*-3,4,5-trimethylgalloyl- $\alpha$ -L-fucopyranoside (**3q**)

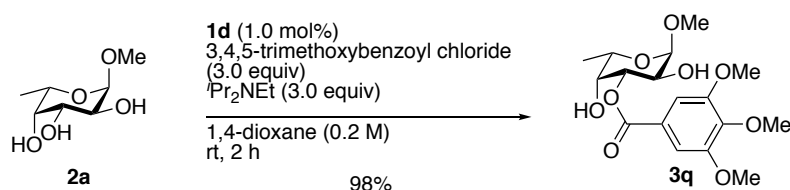

3,4,5-Trimethylgalloyl chloride (138  $\mu\text{L}$ , 0.600 mmol, 3.0 equiv) was added to a stirred mixture of methyl  $\alpha$ -L-fucopyranoside (**2a**) (35.6 mg, 2.00  $\mu\text{mol}$ , 1.0 equiv), boronic acid **1d** (0.002 M in 1,4-dioxane, 1.00 mL, 0.00200 mmol, 1.0 mol%) and *N,N*-diisopropylethylamine (105  $\mu\text{L}$ , 0.600 mmol, 3.0 equiv) under ambient atmosphere. After stirring for 2 hours, the reaction was quenched by addition of 1 M HCl (2.0 mL) and the resulting mixture was extracted two times with ethyl acetate. The combined organic layers were washed with sat.  $\text{NaHCO}_3$  aq., water and brine, dried over  $\text{Na}_2\text{SO}_4$ , filtered, and concentrated *in vacuo*. The resulting crude material was purified by silica gel chromatography (chloroform : methanol = 100 : 1) to give **3q** (70.3 mg, 0.196 mmol, 98%) as a white solid.

Data for **3q**:  $R_f$  = 0.34 (20/1  $\text{CHCl}_3$  /  $\text{MeOH}$ ); mp 132-136  $^\circ\text{C}$ ;  $[\alpha]_{\text{D}}^{23}$   $-142.4^\circ$  ( $c$  = 1.0,  $\text{CHCl}_3$ );  $^1\text{H}$  NMR (400 MHz,  $\text{CDCl}_3$ )  $\delta$  7.32 (s, 2H), 5.25 (dd,  $J$  = 10.4, 3.2 Hz, 1H, *H*-3), 4.84 (d,  $J$  = 4.0 Hz, 1H, *H*-1), 4.13 (dd,  $J$  = 10.4, 4.0 Hz, 1H, *H*-2), 4.08 (q,  $J$  = 6.4 Hz, 1H, *H*-5), 3.98 (d,  $J$  = 3.2 Hz, 1H, *H*-4), 3.90 (s, 6H), 3.89 (s, 3H), 3.47 (s, 3H), 2.00 (br, 2H, *OH*-2, *OH*-4), 1.31 (d,  $J$  = 6.4 Hz, 3H, *H*-6);  $^{13}\text{C}$  NMR (100 MHz,  $\text{CDCl}_3$ )  $\delta$  166.0, 152.9, 142.6, 124.7, 107.1, 99.7, 74.8, 70.8, 67.1, 65.7, 60.9, 56.3, 55.5, 16.0; IR (KBr)  $\nu$  = 3312, 2943, 1703, 1590, 1508, 1459, 1418, 1362, 1337, 1231, 1130, 1037, 1007, 965, 868, 774  $\text{cm}^{-1}$ ; HRMS (ESI)  $m/z$  calcd for  $\text{C}_{17}\text{H}_{24}\text{NaO}_9$   $[\text{M}+\text{Na}]^+$  395.1318, found 395.1299.

### Methyl 3-*O*-2-thenoyl- $\alpha$ -L-fucopyranoside (**3r**)

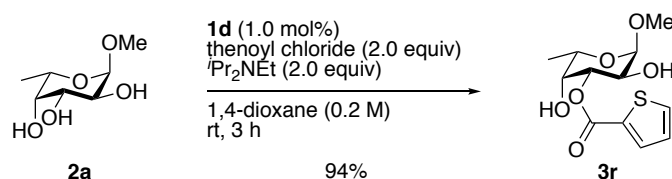

2-Thenoyl chloride (42.5  $\mu$ L, 0.400 mmol, 2.0 equiv) was added to a stirred mixture of methyl  $\alpha$ -L-fucopyranoside (**2a**) (35.6 mg, 0.200 mmol, 1.0 equiv), boronic acid **1d** (0.002 M in 1,4-dioxane, 1.00 mL, 2.00  $\mu$ mol, 1.0 mol%) and *N,N*-diisopropylethylamine (69.6  $\mu$ L, 0.400 mmol, 2.0 equiv) under ambient atmosphere. After stirring for 3 hours, the reaction was quenched by addition of 1 M HCl (2.0 mL) and the resulting mixture was extracted two times with ethyl acetate. The combined organic layers were washed with sat. NaHCO<sub>3</sub> aq., water and brine, dried over Na<sub>2</sub>SO<sub>4</sub>, filtered, and concentrated *in vacuo*. The resulting crude material was purified by silica gel chromatography (hexane : ethyl acetate = 1 : 1) to give **3r** (54.2 mg, 0.189 mmol, 94%) as a white solid.

Data for **3r**:  $R_f$  = 0.38 (1/2 *n*-hexane / EtOAc); mp 124-126 °C;  $[\alpha]_D^{23}$  -176.6° ( $c$  = 1.0, CHCl<sub>3</sub>); <sup>1</sup>H NMR (400 MHz, CDCl<sub>3</sub>)  $\delta$  7.88 (dd,  $J$  = 4.0, 1.2 Hz, 1H), 7.59 (dd,  $J$  = 4.8, 1.2 Hz, 1H), 7.12 (dd,  $J$  = 4.8, 4.0 Hz, 1H), 5.24 (dd,  $J$  = 10.0, 2.8 Hz, 1H, *H*-3), 4.83 (d,  $J$  = 4.0 Hz, 1H, *H*-1), 4.10 (dd,  $J$  = 10.0, 4.0 Hz, 1H, *H*-2), 4.06 (q,  $J$  = 6.8 Hz, 1H, *H*-5), 3.97 (d,  $J$  = 2.8 Hz, 1H, *H*-4), 3.46 (s, 3H), 2.02 (br, 2H, OH-2, OH-4), 1.31 (d,  $J$  = 6.8 Hz, 3H, *H*-6); <sup>13</sup>C NMR (100 MHz, CDCl<sub>3</sub>)  $\delta$  161.9, 134.1, 133.1, 133.0, 127.9, 99.7, 74.8, 70.9, 67.1, 65.7, 55.5, 16.0; IR (KBr)  $\nu$  = 3357, 2992, 2938, 1710, 1525, 1450, 1419, 1364, 1260, 1170, 1088, 1041, 1006, 963, 859, 761, 749, 681, 636, 491 cm<sup>-1</sup>; HRMS (ESI)  $m/z$  calcd for C<sub>12</sub>H<sub>16</sub>NaO<sub>6</sub>S [M+Na]<sup>+</sup> 311.0565, found 311.0551.

### Methyl 3-*O*-acetyl- $\alpha$ -L-fucopyranoside (**3s**)

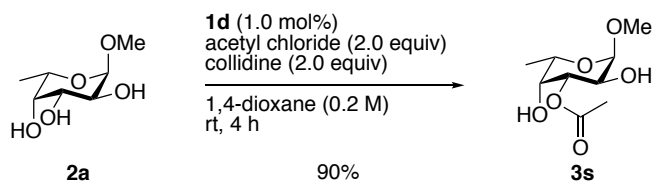

Acetyl chloride (28.3  $\mu$ L, 0.400 mmol, 2.0 equiv) was added to a stirred mixture of methyl  $\alpha$ -L-fucopyranoside (**2a**) (35.6 mg, 0.200 mmol, 1.0 equiv), boronic acid **1d** (0.002 M in 1,4-dioxane, 1.00 mL, 2.00  $\mu$ mol, 1.0 mol%) and collidine (53.2  $\mu$ L, 0.400 mmol, 2.0 equiv) under ambient atmosphere. After stirring for 4 hours, the resulting mixture was filtered through a short pad of silica gel by using pipette and washed with ethyl acetate and concentrated *in vacuo*. The resulting crude material was purified by silica gel chromatography (chloroform : methanol = 100 : 1) to give **3s** (39.6 mg, 0.180 mmol, 90%) as a white solid.

Data for **3s**:  $R_f$  = 0.24 (20/1  $\text{CHCl}_3$  /  $\text{MeOH}$ ); mp 112-114  $^{\circ}\text{C}$ ;  $[\alpha]_{\text{D}}^{23}$   $-213.4^{\circ}$  ( $c$  = 1.0,  $\text{CHCl}_3$ );  $^1\text{H}$  NMR (400 MHz,  $\text{CDCl}_3$ )  $\delta$  5.06 (dd,  $J$  = 10.4, 2.8 Hz, 1H,  $H$ -3), 4.79 (d,  $J$  = 4.0 Hz, 1H,  $H$ -1), 4.00 (q,  $J$  = 6.8 Hz, 1H,  $H$ -5), 3.95 (dd,  $J$  = 10.4, 4.0 Hz, 1H,  $H$ -2), 3.84 (d,  $J$  = 2.8 Hz, 1H,  $H$ -4), 3.44 (s, 3H), 2.16 (s, 3H), 1.91 (br, 2H,  $\text{OH}$ -2,  $\text{OH}$ -4), 1.28 (d,  $J$  = 6.8 Hz, 3H,  $H$ -6);  $^{13}\text{C}$  NMR (100 MHz,  $\text{CDCl}_3$ )  $\delta$  170.9, 99.6, 73.8, 70.8, 67.1, 65.7, 55.5, 21.1, 16.0; IR (KBr)  $\nu$  = 3499, 3435, 2989, 2969, 2947, 2920, 2849, 1711, 1388, 1261, 1085, 1028, 963, 803, 755, 646, 483  $\text{cm}^{-1}$ ; HRMS (ESI)  $m/z$  calcd for  $\text{C}_9\text{H}_{16}\text{NaO}_6$   $[\text{M}+\text{Na}]^+$  243.0845, found 243.0839.

Methyl 2-*O*-acetyl- $\alpha$ -L-fucopyranoside (**SI-7**)

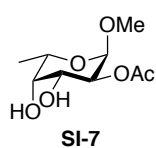

Data for **SI-7**: colorless amorphous material;  $R_f$  = 0.20 (1/2 *n*-hexane / EtOAc);  $[\alpha]_D^{23}$   $-182.3^\circ$  ( $c$  = 1.0,  $\text{CHCl}_3$ );  $^1\text{H}$  NMR (400 MHz,  $\text{CDCl}_3$ )  $\delta$  4.98 (dd,  $J$  = 10.4, 4.0 Hz, 1H, *H*-2), 4.83 (d,  $J$  = 4.0 Hz, 1H, *H*-1), 3.99–3.94 (m, 2H, *H*-3, *H*-5), 3.80 (d,  $J$  = 3.2 Hz, 1H, *H*-4), 3.36 (s, 3H), 3.00 (br, 1H, OH), 2.89 (br, 1H, OH), 2.14 (s, 3H), 1.29 (d,  $J$  = 6.4 Hz, 3H, *H*-6);  $^{13}\text{C}$  NMR (100 MHz,  $\text{CDCl}_3$ )  $\delta$  171.7, 97.3, 72.4, 71.6, 68.6, 65.4, 55.3, 21.1, 16.0; IR (neat)  $\nu$  = 3561, 3330, 2993, 2924, 1736, 1490, 1366, 1249, 1193, 1163, 1141, 1098, 1054, 997, 961, 926, 896, 869, 804, 674, 419  $\text{cm}^{-1}$ ; HRMS (ESI)  $m/z$  calcd for  $\text{C}_9\text{H}_{16}\text{NaO}_6$   $[\text{M}+\text{Na}]^+$  243.0845, found 243.0837.

Methyl 2,3-*O*-diacetyl- $\alpha$ -L-fucopyranoside (**SI-8**)

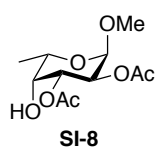

Data for **SI-8**: colorless oil;  $R_f$  = 0.36 (1/1 *n*-hexane / EtOAc);  $[\alpha]_D^{24}$   $-158.1^\circ$  ( $c$  = 1.0,  $\text{CHCl}_3$ );  $^1\text{H}$  NMR (400 MHz,  $\text{CDCl}_3$ )  $\delta$  5.26 (dd,  $J$  = 10.8, 2.8 Hz, 1H, *H*-3), 5.19 (dd,  $J$  = 10.8, 3.6 Hz, 1H, *H*-2), 4.90 (d,  $J$  = 3.6 Hz, 1H, *H*-1), 4.04 (q,  $J$  = 6.8 Hz, 1H, *H*-5), 3.92 (br, 1H, *H*-4), 3.38 (s, 3H), 2.11 (br, 1H, OH-4), 2.09 (s, 3H), 2.07 (s, 3H), 1.28 (d,  $J$  = 6.8 Hz, 3H, *H*-6);  $^{13}\text{C}$  NMR (100 MHz,  $\text{CDCl}_3$ )  $\delta$  170.5, 170.0, 97.2, 70.7, 70.6, 68.1, 65.2, 55.3, 20.9, 20.8, 15.9; IR (neat)  $\nu$  = 3495, 2939, 1742, 1373, 1234, 1197, 1164, 1120, 1056, 966, 931, 770  $\text{cm}^{-1}$ ; HRMS (ESI)  $m/z$  calcd for  $\text{C}_{11}\text{H}_{18}\text{NaO}_7$   $[\text{M}+\text{Na}]^+$  285.0950, found 285.0944.

### Methyl 3-*O*-butyryl- $\alpha$ -L-fucopyranoside (**3t**)

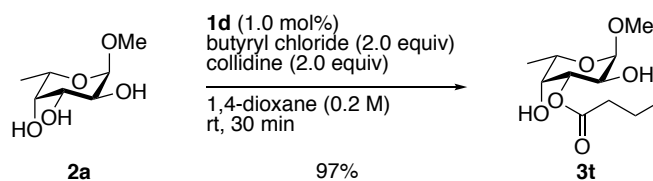

Butyryl chloride (41.8  $\mu$ L, 0.400 mmol, 2.0 equiv) was added to a stirred mixture of methyl  $\alpha$ -L-fucopyranoside (**2a**) (35.6 mg, 0.200 mmol, 1.0 equiv), boronic acid **1d** (0.002 M in 1,4-dioxane, 1.00 mL, 2.00  $\mu$ mol, 1.0 mol%) and collidine (53.2  $\mu$ L, 0.400 mmol, 2.0 equiv) under ambient atmosphere. After stirring for 30 minutes, the resulting mixture was filtered through a short pad of silica gel by using pipette and washed with ethyl acetate and concentrated *in vacuo*. The resulting crude material was purified by silica gel chromatography (hexane : ethyl acetate = 1 : 1) to give **3t** (48.1 mg, 0.194 mmol, 97%) as a colorless amorphous material.

Data for **3t**:  $R_f$  = 0.23 (1/1 *n*-hexane / EtOAc);  $[\alpha]_D^{23}$   $-169.5^\circ$  ( $c$  = 1.1,  $\text{CHCl}_3$ );  $^1\text{H}$  NMR (400 MHz,  $\text{CDCl}_3$ )  $\delta$  5.08 (dd,  $J$  = 10.4, 3.2 Hz, 1H, *H*-3), 4.79 (d,  $J$  = 4.0 Hz, 1H, *H*-1), 3.99 (br q,  $J$  = 6.8 Hz, 1H, *H*-5), 3.95 (dt,  $J$  = 10.4, 4.0 Hz, 1H, *H*-2), 3.83 (br t,  $J$  = 3.2 Hz, 1H, *H*-4), 3.44 (s, 3H), 2.41 (dt,  $J$  = 15.2, 7.6 Hz, 1H), 2.38 (dt,  $J$  = 15.2, 7.6 Hz, 1H), 1.97 (br d,  $J$  = 10.4 Hz, 1H, *OH*-2), 1.94 (br d,  $J$  = 3.2 Hz, 1H, *OH*-4), 1.69 (sext,  $J$  = 7.6 Hz, 2H), 1.28 (d,  $J$  = 6.8 Hz, 3H, *H*-6), 0.97 (t,  $J$  = 7.6 Hz, 3H);  $^{13}\text{C}$  NMR (100 MHz,  $\text{CDCl}_3$ )  $\delta$  173.5, 99.7, 73.5, 70.9, 67.1, 65.6, 55.5, 36.2, 18.5, 16.0, 13.6; IR (neat)  $\nu$  = 3486, 2936, 1720, 1289, 1159, 1051, 961, 871  $\text{cm}^{-1}$ ; HRMS (ESI)  $m/z$  calcd for  $\text{C}_{11}\text{H}_{20}\text{NaO}_6$   $[\text{M}+\text{Na}]^+$  271.1158, found 271.1158.

### Methyl 3-*O*-palmitoyl- $\alpha$ -L-fucopyranoside (**3u**)

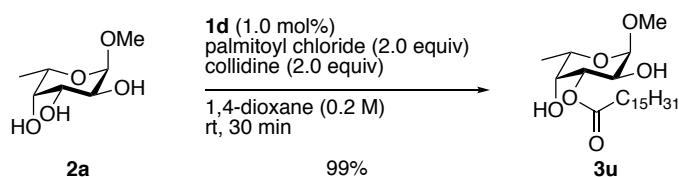

Palmitoyl chloride (121  $\mu$ L, 0.400 mmol, 2.0 equiv) was added to a stirred mixture of methyl  $\alpha$ -L-fucopyranoside (**2a**) (35.6 mg, 0.200 mmol, 1.0 equiv), boronic acid **1d** (0.002 M in 1,4-dioxane, 1.00 mL, 2.00  $\mu$ mol, 1.0 mol%, 0.2 M) and collidine (53.2  $\mu$ L, 0.400 mmol, 2.0 equiv) under ambient atmosphere. After stirring for 30 minutes, the resulting mixture was filtered through a short pad of silica gel by using pipette and washed with ethyl acetate and concentrated *in vacuo*. The resulting crude material was purified by silica gel chromatography (hexane : ethyl acetate = 2 : 1) to give **3u** (82.4 mg, 0.198 mmol, 99%) as a white solid.

Data for **3u**:  $R_f$  = 0.20 (2/1 *n*-hexane / EtOAc); mp 66-68  $^{\circ}$ C;  $[\alpha]_D^{23}$   $-111.4^{\circ}$  ( $c$  = 1.0, CHCl<sub>3</sub>);  $^1\text{H}$  NMR (400 MHz, CDCl<sub>3</sub>)  $\delta$  5.08 (dd,  $J$  = 10.4, 3.2 Hz, 1H, *H*-3), 4.79 (d,  $J$  = 4.0 Hz, 1H, *H*-1), 4.01 (br q,  $J$  = 6.8 Hz, 1H, *H*-5), 3.95 (dt,  $J$  = 10.4, 4.0 Hz, 1H, *H*-2), 3.84 (br t,  $J$  = 3.2 Hz, 1H, *H*-4), 3.44 (s, 3H), 2.42 (dt,  $J$  = 15.6, 7.6 Hz, 1H), 2.39 (dt,  $J$  = 15.6, 7.6 Hz, 1H), 1.97 (br d,  $J$  = 10.4 Hz, 1H, OH-2), 1.94 (br d,  $J$  = 3.2 Hz, 1H, OH-4), 1.65 (quint,  $J$  = 7.6 Hz, 2H), 1.29 (d,  $J$  = 6.8 Hz, 3H, *H*-6), 1.25 (br s, 24H), 0.88 (t,  $J$  = 7.6 Hz, 3H);  $^{13}\text{C}$  NMR (100 MHz, CDCl<sub>3</sub>)  $\delta$  173.7, 99.7, 73.5, 70.9, 67.1, 65.7, 55.5, 34.3, 31.9, 29.67, 29.66, 29.65, 29.63, 29.62, 29.58, 29.4, 29.3, 29.2, 29.1, 25.0, 22.6, 16.0, 14.1; IR (KBr)  $\nu$  = 3518, 3436, 2915, 2847, 1708, 1467, 1425, 1383, 1343, 1245, 1225, 1204, 1186, 1155, 1090, 1062, 1003, 967, 769, 720  $\text{cm}^{-1}$ ; HRMS (ESI)  $m/z$  calcd for C<sub>23</sub>H<sub>44</sub>NaO<sub>6</sub> [M+Na]<sup>+</sup> 439.3036, found 439.3030.



### Methyl 3-*O*-oleoyl- $\alpha$ -L-fucopyranoside (**3v**)

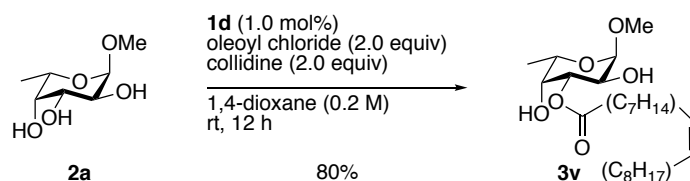

Oleoyl chloride (132  $\mu$ L, 0.400 mmol, 2.0 equiv) was added to a stirred mixture of methyl  $\alpha$ -L-fucopyranoside (**2a**) (35.6 mg, 0.200 mmol, 1.0 equiv), boronic acid **1d** (0.002 M in 1,4-dioxane, 1.00 mL, 2.00  $\mu$ mol, 1.0 mol%) and collidine (53.2  $\mu$ L, 0.400 mmol, 2.0 equiv) under ambient atmosphere. After stirring for 12 hours, the resulting mixture was filtered through a short pad of silica gel by using pipette and washed with ethyl acetate and concentrated *in vacuo*. The resulting crude material was purified by silica gel chromatography (hexane : ethyl acetate = 4 : 1) to give **3v** (70.9 mg, 0.160 mmol, 80%) as a colorless oil.

Data for **3v**:  $R_f$  = 0.30 (2/1 *n*-hexane / EtOAc);  $[\alpha]_D^{23}$   $-109.5^\circ$  ( $c$  = 1.0,  $\text{CHCl}_3$ );  $^1\text{H}$  NMR (400 MHz,  $\text{CDCl}_3$ )  $\delta$  5.37–5.28 (m, 2H), 5.05 (dd,  $J$  = 10.4, 2.8 Hz, 1H, *H*-3), 4.77 (d,  $J$  = 4.0 Hz, 1H, *H*-1), 3.99 (q,  $J$  = 6.8 Hz, 1H, *H*-5), 3.94 (dt,  $J$  = 10.4, 4.0 Hz, 1H, *H*-2), 3.82 (br, 1H, *H*-4), 3.42 (s, 3H), 2.42 (quin,  $J$  = 8.0 Hz, 1H), 2.37 (quin,  $J$  = 8.0 Hz, 1H), 2.01–1.97 (m, 6H), 1.64 (quin,  $J$  = 8.0 Hz, 2H), 1.29–1.26 (m, 23H), 0.86 (t,  $J$  = 6.8 Hz, 3H);  $^{13}\text{C}$  NMR (100 MHz,  $\text{CDCl}_3$ )  $\delta$  173.7, 123.0, 129.7, 99.7, 73.5, 70.8, 67.1, 65.6, 55.4, 34.3, 31.9, 29.7, 29.6, 29.5, 29.3, 29.12, 29.05, 29.0, 27.2, 27.1, 24.9, 22.6, 16.0, 14.1; IR (neat)  $\nu$  = 3460, 2926, 2854, 1737, 1465, 1383, 1364, 1194, 1163, 1055, 961, 759, 723, 680  $\text{cm}^{-1}$ ; HRMS (ESI)  $m/z$  calcd for  $\text{C}_{25}\text{H}_{46}\text{NaO}_6$   $[\text{M}+\text{Na}]^+$  465.3192, found 465.3185.

### Methyl 3-*O*-3-phenylpropionyl- $\alpha$ -L-fucopyranoside (**3w**)

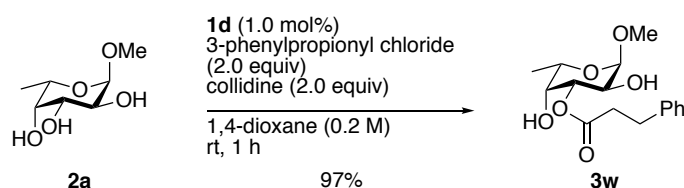

3-Phenylpropionyl chloride (59.2  $\mu$ L, 0.400 mmol, 2.0 equiv) was added to a stirred mixture of methyl  $\alpha$ -L-fucopyranoside (**2a**) (35.6 mg, 0.200 mmol, 1.0 equiv), boronic acid **1d** (0.002 M in 1,4-dioxane, 1.00 mL, 2.00  $\mu$ mol, 1.0 mol%) and collidine (53.2  $\mu$ L, 0.400 mmol, 2.0 equiv) under ambient atmosphere. After stirring for 1 hour, the resulting mixture was filtered through a short pad of silica gel by using pipette and washed with ethyl acetate and extracted two times with ethyl acetate. The combined organic layers were washed with sat.  $\text{NaHCO}_3$  aq., water and brine, dried over  $\text{Na}_2\text{SO}_4$ , filtered, and concentrated *in vacuo*. The resulting crude material was purified by silica gel chromatography (hexane : ethyl acetate = 1 : 1) to give **3w** (60.2 mg, 0.194 mmol, 97%) as a white solid.

Data for **3w**:  $R_f$  = 0.38 (1/2 *n*-hexane / EtOAc); mp 108-110  $^{\circ}\text{C}$ ;  $[\alpha]_{\text{D}}^{23}$   $-151.4^{\circ}$  ( $c$  = 1.0,  $\text{CHCl}_3$ );  $^1\text{H}$  NMR (400 MHz,  $\text{CDCl}_3$ )  $\delta$  7.32–7.28 (m, 2H), 7.23–7.20 (m, 3H), 5.02 (dd,  $J$  = 10.4, 2.8 Hz, 1H, *H*-3), 4.76 (d,  $J$  = 4.0 Hz, 1H, *H*-1), 3.95 (q,  $J$  = 6.4 Hz, 1H, *H*-5), 3.92 (dd,  $J$  = 10.4, 4.0 Hz, 1H, *H*-2), 3.68 (d,  $J$  = 2.8 Hz, 1H, *H*-4), 3.42 (s, 3H), 3.01 (dt,  $J$  = 15.2, 7.6 Hz, 1H), 2.96 (dt,  $J$  = 15.2, 7.6 Hz, 1H), 2.78 (dt,  $J$  = 15.2, 7.6 Hz, 1H), 2.75 (dt,  $J$  = 15.2, 7.6 Hz, 1H), 1.25 (d,  $J$  = 6.4 Hz, 3H, *H*-6);  $^{13}\text{C}$  NMR (100 MHz,  $\text{CDCl}_3$ )  $\delta$  172.7, 140.2, 128.5, 128.3, 126.4, 99.6, 73.9, 70.7, 66.9, 65.6, 55.5, 35.8, 31.0, 16.0; IR (KBr)  $\nu$  = 3374, 3005, 2938, 2890, 1697, 1415, 1390, 1359, 1309, 1198, 1166, 1091, 1069, 960, 758, 698  $\text{cm}^{-1}$ ; HRMS (ESI)  $m/z$  calcd for  $\text{C}_{16}\text{H}_{22}\text{NaO}_6$   $[\text{M}+\text{Na}]^+$  333.1314, found 333.1298.

Methyl 3-*O*-isovaleryl- $\alpha$ -L-fucopyranoside (**3x**)

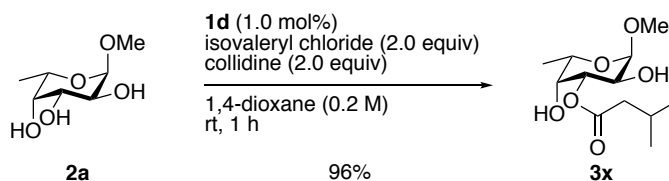

Isovaleryl chloride (48.7  $\mu$ L, 0.400 mmol, 2.0 equiv) was added to a stirred mixture of methyl  $\alpha$ -L-fucopyranoside (**2a**) (35.6 mg, 0.200 mmol, 1.0 equiv), boronic acid **1d** (0.002 M in 1,4-dioxane, 1.00 mL, 2.00  $\mu$ mol, 1.0 mol%, 0.2 M) and collidine (53.2  $\mu$ L, 0.400 mmol, 2.0 equiv) under ambient atmosphere. After stirring for 1 hour, the resulting mixture was filtered through a short pad of silica gel by using pipette and washed with ethyl acetate and concentrated *in vacuo*. The resulting crude material was purified by silica gel chromatography (hexane : ethyl acetate = 2 : 1) to give **3x** (50.4 mg, 0.192 mmol, 96%) as a white solid.

Data for **3x**:  $R_f$  = 0.30 (1/1 *n*-hexane / EtOAc); mp 92-94  $^{\circ}$ C;  $[\alpha]_D^{23}$   $-192.3^{\circ}$  ( $c$  = 1.0, CHCl<sub>3</sub>);  $^1\text{H}$  NMR (400 MHz, CDCl<sub>3</sub>)  $\delta$  5.09 (dd,  $J$  = 10.4, 3.2 Hz, 1H, *H*-3), 4.79 (d,  $J$  = 4.0 Hz, 1H, *H*-1), 4.01 (br q,  $J$  = 6.8 Hz, 1H, *H*-5), 3.95 (dt,  $J$  = 10.4, 4.0 Hz, 1H, *H*-2), 3.84 (br t,  $J$  = 3.2 Hz, 1H, *H*-4), 3.44 (s, 3H), 2.32 (dd,  $J$  = 14.8, 7.2 Hz, 1H), 2.28 (dd,  $J$  = 14.8, 7.2 Hz, 1H), 2.19–2.09 (m, 1H), 1.93 (d,  $J$  = 10.4 Hz, 1H, *OH*-2), 1.88 (br d,  $J$  = 3.2 Hz, 1H, *OH*-4), 1.29 (d,  $J$  = 6.8 Hz, 3H, *H*-6), 0.99 (d,  $J$  = 7.2 Hz, 6H);  $^{13}\text{C}$  NMR (100 MHz, CDCl<sub>3</sub>)  $\delta$  172.9, 99.7, 73.5, 71.0, 67.1, 65.7, 55.5, 43.4, 25.9, 22.33, 22.32, 16.0; IR (KBr)  $\nu$  = 3472, 2958, 1719, 1368, 1296, 1052, 961, 871  $\text{cm}^{-1}$ ; HRMS (ESI)  $m/z$  calcd for C<sub>12</sub>H<sub>22</sub>NaO<sub>6</sub>  $[M+\text{Na}]^+$  285.1314, found 285.1315.

### Methyl 3-*O*-isobutyryl- $\alpha$ -L-fucopyranoside (**3y**)

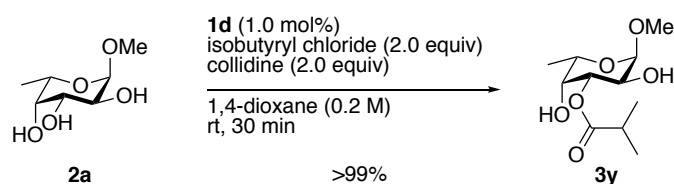

Isobutyryl chloride (42.2  $\mu$ L, 0.400 mmol, 2.0 equiv) was added to a stirred mixture of methyl  $\alpha$ -L-fucopyranoside (**2a**) (35.6 mg, 0.20 mmol, 1.0 equiv), boronic acid **1d** (0.002 M in 1,4-dioxane, 1.00 mL, 2.00  $\mu$ mol, 1.0 mol%) and collidine (53.2  $\mu$ L, 0.400 mmol, 2.0 equiv) under ambient atmosphere. After stirring for 30 minutes, the resulting mixture was filtered through a short pad of silica gel by using pipette and washed with ethyl acetate and concentrated *in vacuo*. The resulting crude material was purified by silica gel chromatography (hexane : ethyl acetate = 1 : 1) to give **3y** (50.0 mg, 0.201 mmol, >99%) as a white solid.

Data for **3y**:  $R_f$  = 0.25 (1/1 *n*-hexane / EtOAc); mp 97-100  $^{\circ}$ C;  $[\alpha]_D^{23}$   $-200.8^{\circ}$  ( $c$  = 1.0,  $\text{CHCl}_3$ );  $^1\text{H}$  NMR (400 MHz,  $\text{CDCl}_3$ )  $\delta$  5.05 (dd,  $J$  = 10.4, 3.2 Hz, 1H,  $H$ -3), 4.79 (d,  $J$  = 4.0 Hz, 1H,  $H$ -1), 4.01 (br q,  $J$  = 6.8 Hz, 1H,  $H$ -5), 3.96 (dt,  $J$  = 10.4, 4.0 Hz, 1H,  $H$ -2), 3.84 (br, 1H,  $H$ -4), 3.44 (s, 3H), 2.66 (sept,  $J$  = 6.8 Hz, 1H), 1.94 (d,  $J$  = 10.4 Hz, 1H,  $OH$ -2), 1.92 (br d,  $J$  = 3.2 Hz, 1H,  $OH$ -4), 1.28 (d,  $J$  = 6.8 Hz, 3H,  $H$ -6), 1.21 (d,  $J$  = 6.8 Hz, 3H), 1.20 (d,  $J$  = 6.8 Hz, 3H);  $^{13}\text{C}$  NMR (100 MHz,  $\text{CDCl}_3$ )  $\delta$  177.0, 99.7, 73.5, 70.9, 67.2, 65.7, 55.5, 34.1, 19.01, 19.00, 16.0; IR (KBr)  $\nu$  = 3480, 2938, 1728, 1196, 1158, 1051, 961, 758  $\text{cm}^{-1}$ ; HRMS (ESI)  $m/z$  calcd for  $\text{C}_{11}\text{H}_{20}\text{NaO}_6$   $[\text{M}+\text{Na}]^+$  271.1158, found 271.1163.

### Methyl 3-*O*-pivaloyl- $\alpha$ -L-fucopyranoside (**3z**)

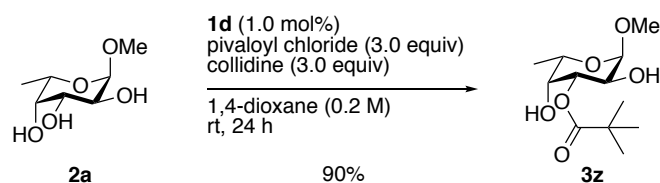

Pivaloyl chloride (73.1  $\mu$ L, 0.600 mmol, 3.0 equiv) was added to a stirred mixture of methyl  $\alpha$ -L-fucopyranoside (**2a**) (35.6 mg, 0.200 mmol, 1.0 equiv), boronic acid **1d** (0.002 M in 1,4-dioxane, 1.00 mL, 2.00  $\mu$ mol, 1.0 mol%) and collidine (79.8  $\mu$ L, 0.600 mmol, 3.0 equiv) in dry 1,4-dioxane under ambient atmosphere. After stirring for 24 hours, the resulting mixture was filtered through a short pad of silica gel by using pipette and washed with ethyl acetate and concentrated *in vacuo*. The resulting crude material was purified by silica gel chromatography (chloroform : methanol = 100 : 1) to give **3z** (47.3 mg, 0.180 mmol, 90%) as a white solid.

Data for **3z**:  $R_f$  = 0.45 (20/1  $\text{CHCl}_3$  /  $\text{MeOH}$ ); mp 96-98  $^{\circ}\text{C}$ ;  $[\alpha]_{\text{D}}^{23}$   $-188.1^{\circ}$  ( $c$  = 1.0,  $\text{CHCl}_3$ );  $^1\text{H}$  NMR (400 MHz,  $\text{CDCl}_3$ )  $\delta$  5.04 (dd,  $J$  = 10.4, 3.2 Hz, 1H,  $H$ -3), 4.78 (d,  $J$  = 4.0 Hz, 1H,  $H$ -1), 4.01 (br q,  $J$  = 6.8 Hz, 1H,  $H$ -5), 3.96 (br, 1H,  $H$ -2), 3.83 (d,  $J$  = 3.2 Hz, 1H,  $H$ -4), 3.44 (s, 3H), 1.89 (br, 2H,  $\text{OH}$ -2,  $\text{OH}$ -4), 1.29 (d,  $J$  = 6.8 Hz, 3H,  $H$ -6), 1.25 (s, 9H);  $^{13}\text{C}$  NMR (100 MHz,  $\text{CDCl}_3$ )  $\delta$  178.3, 99.7, 73.5, 70.9, 67.2, 65.7, 55.5, 39.0, 27.2, 16.0; IR (KBr)  $\nu$  = 3465, 2929, 1734, 1191, 1050, 961, 755  $\text{cm}^{-1}$ ; HRMS (ESI)  $m/z$  calcd for  $\text{C}_{12}\text{H}_{22}\text{NaO}_6$   $[\text{M}+\text{Na}]^+$  285.1314, found 285.1328.

### Methyl 3-*O*-cinnamoyl- $\alpha$ -L-fucopyranoside (**3aa**)

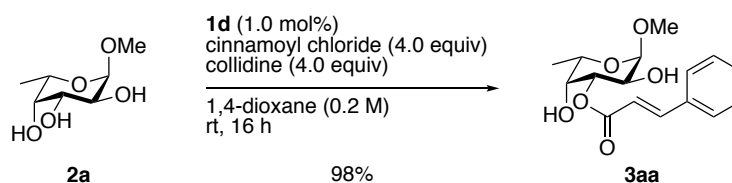

Cinnamoyl chloride (133 mg, 0.800 mmol, 4.0 equiv) was added to a stirred mixture of methyl  $\alpha$ -L-fucopyranoside (**2a**) (35.6 mg, 0.200 mmol, 1.0 equiv), boronic acid **1d** (0.002 M in 1,4-dioxane, 1.00 mL, 2.00  $\mu$ mol, 1.0 mol%) and collidine (106  $\mu$ L, 0.800 mmol, 4.0 equiv) under ambient atmosphere. After stirring for 16 hours, the reaction was quenched by addition of 1 M HCl (2.0 mL) and the resulting mixture was extracted two times with ethyl acetate. The combined organic layers were washed with sat. NaHCO<sub>3</sub> aq., water and brine, dried over Na<sub>2</sub>SO<sub>4</sub>, filtered, and concentrated *in vacuo*. The resulting crude material was purified by silica gel chromatography (hexane : ethyl acetate = 2 : 1) to give **3aa** (60.4 mg, 0.196 mmol, 98%) as a colorless amorphous material.

Data for **3aa**:  $R_f$  = 0.25 (1/1 *n*-hexane / EtOAc);  $[\alpha]_D^{23}$   $-190.5^\circ$  ( $c$  = 1.0, CHCl<sub>3</sub>); <sup>1</sup>H NMR (400 MHz, CDCl<sub>3</sub>)  $\delta$  7.75 (d, 16.0 Hz, 1H), 7.54–7.52 (m, 2H), 7.40–7.38 (m, 3H), 6.54 (d,  $J$  = 16.0 Hz, 1H), 5.18 (dd,  $J$  = 10.0 Hz, 2.8 Hz, 1H, *H*-3), 4.83 (d,  $J$  = 4.0 Hz, 1H, *H*-1), 4.08–4.03 (m, 2H, *H*-2, *H*-5), 3.93 (br d,  $J$  = 2.8 Hz, 1H, *H*-4), 3.46 (s, 3H), 1.97 (br, 2H, *OH*-2, *OH*-4), 1.30 (d,  $J$  = 6.4 Hz, 3H); <sup>13</sup>C NMR (100 MHz, CDCl<sub>3</sub>)  $\delta$  166.8, 145.9, 134.2, 130.5, 128.9, 128.2, 117.5, 99.7, 74.0, 70.9, 67.1, 65.7, 55.5, 16.0; IR (neat)  $\nu$  = 3463, 2933, 1698, 1636, 1313, 1161, 1051, 961, 768 cm<sup>-1</sup>; HRMS (ESI)  $m/z$  calcd for C<sub>16</sub>H<sub>20</sub>NaO<sub>6</sub> [M+Na]<sup>+</sup> 331.1158, found 331.1164.

### Methyl 3-*O*-4-methoxycinnamoyl- $\alpha$ -L-fucopyranoside (**3ab**)

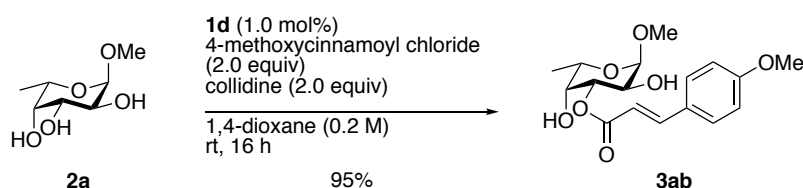

4-Methoxycinnamoyl chloride (78.7 mg, 0.400 mmol, 2.0 equiv) was added to a stirred mixture of methyl  $\alpha$ -L-fucopyranoside (**2a**) (35.6 mg, 0.200 mmol, 1.0 equiv), boronic acid **1d** (0.002 M in 1,4-dioxane, 1.00 mL, 2.00  $\mu$ mol, 1.0 mol%) and collidine (53.2  $\mu$ L, 0.400 mmol, 2.0 equiv) under ambient atmosphere. After stirring for 16 hours, the reaction was quenched by addition of 1 M HCl (2.0 mL) and the resulting mixture was extracted two times with ethyl acetate. The combined organic layers were washed with sat. NaHCO<sub>3</sub> aq., water and brine, dried over Na<sub>2</sub>SO<sub>4</sub>, filtered, and concentrated *in vacuo*. The resulting crude material was purified by silica gel chromatography (hexane : ethyl acetate = 2 : 1) to give **3ab** (64.2 mg, 0.190 mmol, 95%) as a colorless amorphous material.

Data for **3ab**:  $R_f$  = 0.18 (2/1 *n*-hexane / EtOAc);  $[\alpha]_D^{24}$   $-183.3^\circ$  ( $c$  = 1.0, CHCl<sub>3</sub>); <sup>1</sup>H NMR (400 MHz, CDCl<sub>3</sub>)  $\delta$  7.69 (d,  $J$  = 16.0 Hz, 1H), 7.46 (d,  $J$  = 8.8 Hz, 2H), 6.88 (d,  $J$  = 8.8 Hz, 2H), 6.39 (d,  $J$  = 16.0 Hz, 1H), 5.16 (dd,  $J$  = 10.4, 3.2 Hz, 1H, *H*-3), 4.81 (d,  $J$  = 4.0 Hz, 1H, *H*-1), 4.06 (dt,  $J$  = 10.4, 4.0 Hz, 1H, *H*-2), 4.04 (br q,  $J$  = 6.8 Hz, 1H, *H*-5), 3.92 (br, 1H, *H*-4), 3.82 (s, 3H), 3.44 (s, 3H), 2.19 (br, 1H, OH-4), 2.14 (d,  $J$  = 10.4 Hz, 1H, OH-2), 1.29 (d,  $J$  = 6.8 Hz, 3H, *H*-6); <sup>13</sup>C NMR (100 MHz, CDCl<sub>3</sub>)  $\delta$  167.1, 161.5, 145.6, 129.9, 126.9, 114.8, 114.3, 99.7, 73.8, 70.8, 67.1, 65.7, 55.5, 55.3, 16.0; IR (neat)  $\nu$  = 3461, 2936, 1699, 1605, 1514, 1423, 1255, 1174, 1053, 961, 830, 756 cm<sup>-1</sup>; HRMS (ESI)  $m/z$  calcd for C<sub>17</sub>H<sub>22</sub>NaO<sub>7</sub> [M+Na]<sup>+</sup> 361.1263, found 361.1255.

Methyl 3-*O*-3,4-dimethoxycinnamoyl- $\alpha$ -L-fucopyranoside (**3ac**)

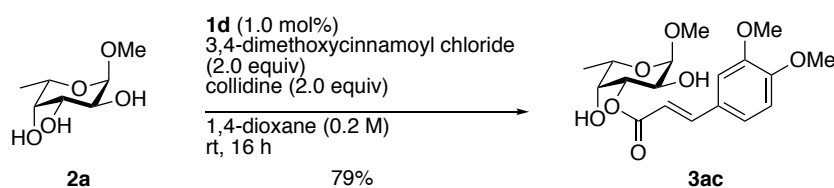

3,4-Dimethoxycinnamoyl chloride (90.7 mg, 0.400 mmol, 2.0 equiv) was added to a stirred mixture of methyl  $\alpha$ -L-fucopyranoside (**2a**) (35.6 mg, 0.200 mmol, 1.0 equiv), boronic acid **1d** (0.002 M in 1,4-dioxane, 1.00 mL, 2.00  $\mu$ mol, 1.0 mol%) and collidine (53.2  $\mu$ L, 0.400 mmol, 2.0 equiv) under ambient atmosphere. After stirring for 16 hours, the reaction was quenched by addition of 1 M HCl (2.0 mL) and the resulting mixture was extracted two times with ethyl acetate. The combined organic layers were washed with sat. NaHCO<sub>3</sub> aq., water and brine, dried over Na<sub>2</sub>SO<sub>4</sub>, filtered, and concentrated *in vacuo*. The resulting crude material was purified by silica gel chromatography (chloroform : methanol = 100 : 1) to give **3ac** (58.2 mg, 0.158 mmol, 79%) as a colorless amorphous material.

Data for **3ac**:  $R_f$  = 0.43 (20/1 CHCl<sub>3</sub> / MeOH);  $[\alpha]_D^{23}$  -142.7° ( $c$  = 1.0, CHCl<sub>3</sub>); <sup>1</sup>H NMR (400 MHz, CDCl<sub>3</sub>)  $\delta$  7.67 (d,  $J$  = 16.0 Hz, 1H), 7.09 (dd,  $J$  = 8.4, 1.6 Hz, 1H), 7.04 (d,  $J$  = 1.6 Hz, 1H), 6.84 (d,  $J$  = 8.4 Hz, 1H), 6.40 (d,  $J$  = 16.0 Hz, 1H), 5.16 (dd,  $J$  = 10.0, 2.8 Hz, 1H, *H*-3), 4.82 (d,  $J$  = 4.0 Hz, 1H, *H*-1), 4.06 (dd,  $J$  = 10.0, 4.0 Hz, 1H, *H*-2), 4.04 (q,  $J$  = 6.8 Hz, 1H, *H*-5), 3.93 (d,  $J$  = 2.8 Hz, 1H, *H*-4), 3.90 (s, 3H), 3.89 (s, 3H), 3.45 (s, 3H), 2.21 (br, 2H, *OH*-2, *OH*-4), 1.29 (d,  $J$  = 6.8 Hz, 3H); <sup>13</sup>C NMR (100 MHz, CDCl<sub>3</sub>)  $\delta$  167.0, 151.3, 149.1, 145.8, 127.1, 122.9, 115.0, 110.9, 109.5, 99.7, 73.9, 70.8, 67.1, 65.7, 55.9, 55.8, 55.5, 16.0; IR (neat)  $\nu$  = 3483, 2937, 1703, 1633, 1599, 1514, 1465, 1262, 1159, 1140, 1052, 809, 755 cm<sup>-1</sup>; HRMS (ESI)  $m/z$  calcd for C<sub>18</sub>H<sub>24</sub>NaO<sub>8</sub> [M+Na]<sup>+</sup> 391.1369, found 391.1367.



### Methyl 3-*O*-3,3-dimethylacryloyl- $\alpha$ -L-fucopyranoside (**3ad**)

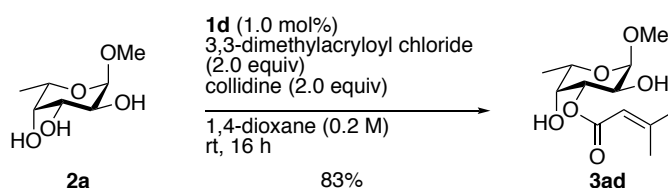

3,3-Dimethylacryloyl chloride (44.5  $\mu$ L, 0.400 mmol, 2.0 equiv) was added to a stirred mixture of methyl  $\alpha$ -L-fucopyranoside (**2a**) (35.6 mg, 0.200 mmol, 1.0 equiv), boronic acid **1d** (0.002 M in 1,4-dioxane, 1.00 mL, 2.00  $\mu$ mol, 1.0 mol%) and collidine (53.2  $\mu$ L, 0.400 mmol, 2.0 equiv) under ambient atmosphere. After stirring for 16 hours, the reaction was quenched by addition of 1 M HCl (2.0 mL) and the resulting mixture was extracted two times with ethyl acetate. The combined organic layers were washed with sat. NaHCO<sub>3</sub> aq., water and brine, dried over Na<sub>2</sub>SO<sub>4</sub>, filtered, and concentrated *in vacuo*. The resulting crude material was purified by silica gel chromatography (chloroform : methanol = 100 : 1) to give **3ad** (43.2 mg, 0.166 mmol, 83%) as a white solid.

Data for **3ad**:  $R_f$  = 0.37 (20/1 CHCl<sub>3</sub> / MeOH); mp 91-93 °C;  $[\alpha]_D^{23}$  -209.9° ( $c$  = 1.0, CHCl<sub>3</sub>); <sup>1</sup>H NMR (400 MHz, CDCl<sub>3</sub>)  $\delta$  5.80 (sep,  $J$  = 1.2 Hz, 1H), 5.10 (dd,  $J$  = 10.4, 3.2 Hz, 1H, *H*-3), 4.80 (d,  $J$  = 4.0 Hz, 1H, *H*-1), 4.02 (br q,  $J$  = 6.4 Hz, 1H, *H*-5), 3.98 (dt,  $J$  = 10.4, 4.0 Hz, 1H, *H*-2), 3.87 (br t,  $J$  = 3.2 Hz, 1H, *H*-4), 3.44 (s, 3H), 2.18 (d,  $J$  = 1.2 Hz, 3H), 2.00 (br d,  $J$  = 10.4 Hz, 1H, *OH*-2), 1.92 (br d,  $J$  = 3.2 Hz, 1H, *OH*-4), 1.92 (d,  $J$  = 1.2 Hz, 3H), 1.29 (d,  $J$  = 6.4 Hz, 3H, *H*-6); <sup>13</sup>C NMR (100 MHz, CDCl<sub>3</sub>)  $\delta$  166.2, 158.7, 115.5, 99.7, 72.8, 71.0, 67.2, 65.7, 55.5, 27.5, 20.4, 16.0; IR (KBr)  $\nu$  = 3574, 3369, 2984, 2937, 1714, 1652, 1450, 1383, 1234, 1197, 1151, 1087, 1039, 960, 853, 750 cm<sup>-1</sup>; HRMS (ESI)  $m/z$  calcd for C<sub>12</sub>H<sub>20</sub>NaO<sub>6</sub> [M+Na]<sup>+</sup> 283.1158, found 283.1154.

Methyl 3-*O*-benzyloxycarbonyl- $\alpha$ -L-fucopyranoside (**3ae**)

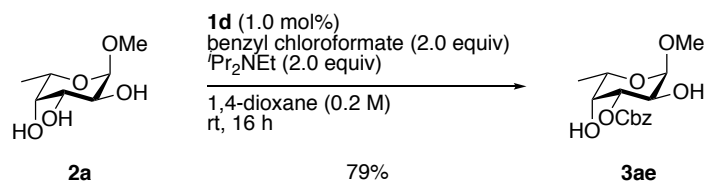

Benzyl chloroformate (56.4  $\mu\text{L}$ , 0.400 mmol, 2.0 equiv) was added to a stirred mixture of methyl  $\alpha$ -L-fucopyranoside (**2a**) (35.6 mg, 0.200 mmol, 1.0 equiv), boronic acid **1d** (0.002 M in 1,4-dioxane, 1.00 mL, 2.00  $\mu\text{mol}$ , 1.0 mol%) and *N,N*-diisopropylethylamine (69.6  $\mu\text{L}$ , 0.400 mmol, 2.0 equiv) under ambient atmosphere. After stirring for 16 hours, the reaction was quenched by addition of 1 M HCl (2.0 mL) and the resulting mixture was extracted two times with ethyl acetate. The combined organic layers were washed with sat.  $\text{NaHCO}_3$  aq., water and brine, dried over  $\text{Na}_2\text{SO}_4$ , filtered, and concentrated *in vacuo*. The resulting crude material was purified by silica gel chromatography (hexane : ethyl acetate = 2 : 1) to give **3ae** (49.1 mg, 0.157 mmol, 79%) as a colorless amorphous material.

Data for **3ae**:  $R_f$  = 0.37 (1/1 *n*-hexane / EtOAc);  $[\alpha]_{\text{D}}^{23}$   $-138.6^\circ$  ( $c$  = 1.0,  $\text{CHCl}_3$ );  $^1\text{H}$  NMR (400 MHz,  $\text{CDCl}_3$ )  $\delta$  7.40–7.34 (m, 5H), 5.21 (d,  $J$  = 12.0 Hz, 1H), 5.17 (d,  $J$  = 12.0 Hz, 1H), 4.91 (dd,  $J$  = 10.0, 2.8 Hz, 1H, *H*-3), 4.80 (d,  $J$  = 4.0 Hz, 1H, *H*-1), 4.02 (dd,  $J$  = 10.0, 4.0 Hz, 1H, *H*-2), 3.99 (q,  $J$  = 6.8 Hz, 1H, *H*-5), 3.92 (br d,  $J$  = 2.8 Hz, 1H, *H*-4), 3.44 (s, 3H), 2.00 (br, 2H, *OH*-2, *OH*-4), 1.29 (d,  $J$  = 6.8 Hz, 3H, *H*-6);  $^{13}\text{C}$  NMR (100 MHz,  $\text{CDCl}_3$ )  $\delta$  154.9, 134.8, 128.64, 128.61, 128.4, 99.6, 77.9, 70.5, 70.1, 67.0, 65.6, 55.5, 16.0; IR (neat)  $\nu$  = 3471, 2937, 1743, 1455, 1387, 1269, 1055, 963, 758  $\text{cm}^{-1}$ ; HRMS (ESI)  $m/z$  calcd for  $\text{C}_{15}\text{H}_{20}\text{NaO}_7$   $[\text{M}+\text{Na}]^+$  335.1107, found 335.1119.

Methyl 3-*O*-2,2,2-trichloroethyloxycarbonyl- $\alpha$ -L-fucopyranoside (**3af**)

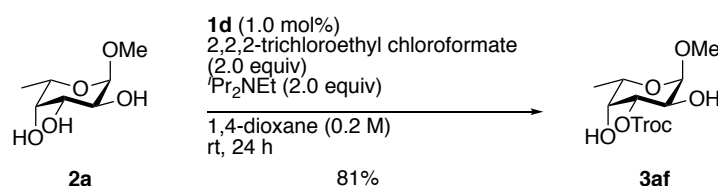

2,2,2-Trichloroethyl chloroformate (53.6  $\mu\text{L}$ , 0.400 mmol, 2.0 equiv) was added to a stirred mixture of methyl  $\alpha$ -L-fucopyranoside (**2a**) (35.6 mg, 0.200 mmol, 1.0 equiv), boronic acid **1d** (0.002 M in 1,4-dioxane, 1.00 mL, 0.00200 mmol, 1.0 mol%) and *N,N*-diisopropylethylamine (69.6  $\mu\text{L}$ , 0.400 mmol, 2.0 equiv) under ambient atmosphere. After stirring for 24 hours, the reaction was quenched by addition of 1 M HCl (2.0 mL) and the resulting mixture was extracted two times with ethyl acetate. The combined organic layers were washed with sat.  $\text{NaHCO}_3$  aq., water and brine, dried over  $\text{Na}_2\text{SO}_4$ , filtered, and concentrated *in vacuo*. The resulting crude material was purified by silica gel chromatography (chloroform : methanol = 100 : 1) to give **3af** (57.5 mg, 0.163 mmol, 81%) as a white solid.

Data for **3af**:  $R_f$  = 0.39 (20/1  $\text{CHCl}_3$  /  $\text{MeOH}$ ); mp 114-117  $^\circ\text{C}$ ;  $[\alpha]_{\text{D}}^{23}$   $-127.6^\circ$  ( $c$  = 1.0,  $\text{CHCl}_3$ );  $^1\text{H}$  NMR (400 MHz,  $\text{CDCl}_3$ )  $\delta$  4.94 (dd,  $J$  = 10.4, 3.2 Hz, 1H, *H*-3), 4.83 (d,  $J$  = 12.0 Hz, 1H), 4.80 (d,  $J$  = 4.0 Hz, 1H, *H*-1), 4.75 (d,  $J$  = 12.0 Hz, 1H), 4.06 (dd,  $J$  = 10.4, 4.0 Hz, 1H, *H*-2), 3.99 (q,  $J$  = 6.8 Hz, 1H, *H*-5), 3.96 (d,  $J$  = 3.2 Hz, 1H, *H*-4), 3.44 (s, 3H), 2.14 (br, 2H, *OH*-2, *OH*-4), 1.29 (d,  $J$  = 6.8 Hz, 3H, *H*-6);  $^{13}\text{C}$  NMR (100 MHz,  $\text{CDCl}_3$ )  $\delta$  153.8, 99.5, 94.2, 79.1, 77.0, 70.3, 66.9, 65.7, 55.5, 16.0; IR (KBr)  $\nu$  = 3521, 3403, 2992, 2919, 1761, 1449, 1388, 1274, 1248, 1168, 1140, 1054, 964, 825, 764, 733, 713, 568  $\text{cm}^{-1}$ ; HRMS (ESI)  $m/z$  calcd for  $\text{C}_{10}\text{H}_{15}^{35}\text{Cl}_3\text{NaO}_7$   $[\text{M}+\text{Na}]^+$  374.9781, found 374.9777.

Methyl 3-*O*-allyloxycarbonyl- $\alpha$ -L-fucopyranoside (**3ag**)

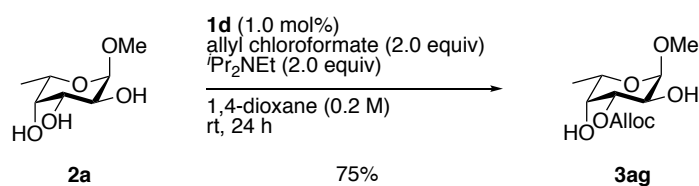

Allyl chloroformate (42.1  $\mu\text{L}$ , 0.400 mmol, 2.0 equiv) was added to a stirred solution of methyl  $\alpha$ -L-fucopyranoside (**2a**) (35.6 mg, 0.200 mmol, 1.0 equiv), boronic acid **1d** (0.002 M in 1,4-dioxane, 1.00 mL, 0.00200 mmol, 1.0 mol%) and *N,N*-diisopropylethylamine (69.6  $\mu\text{L}$ , 0.400 mmol, 2.0 equiv) under ambient atmosphere. After stirring for 24 hours, the reaction was quenched by addition of 1 M HCl (2.0 mL) and the resulting mixture was extracted two times with ethyl acetate. The combined organic layers were washed with sat.  $\text{NaHCO}_3$  aq., water and brine, dried over  $\text{Na}_2\text{SO}_4$ , filtered, and concentrated *in vacuo*. The resulting crude material was purified by silica gel chromatography (hexane : ethyl acetate = 1 : 1) to give **3ag** (39.4 mg, 0.150 mmol, 75%) as a white solid.

Data for **3ag**:  $R_f$  = 0.40 (1/2 *n*-hexane / EtOAc); mp 112-114  $^{\circ}\text{C}$ ;  $[\alpha]_{\text{D}}^{23}$   $-171.1^{\circ}$  ( $c$  = 1.0,  $\text{CHCl}_3$ );  $^1\text{H}$  NMR (400 MHz,  $\text{CDCl}_3$ )  $\delta$  5.94 (ddt,  $J$  = 17.2, 10.4, 5.6 Hz, 1H), 5.38 (dq,  $J$  = 17.2, 1.2 Hz, 1H), 5.29 (dq,  $J$  = 10.4, 1.2 Hz, 1H), 4.89 (dd,  $J$  = 10.4, 3.2 Hz, 1H, *H*-3), 4.80 (d,  $J$  = 4.0 Hz, 1H, *H*-1), 4.65 (dt,  $J$  = 5.6, 1.2 Hz, 2H), 4.02 (dd,  $J$  = 10.4, 4.0 Hz, 1H, *H*-2), 3.99 (q,  $J$  = 6.8 Hz, 1H, *H*-5), 3.92 (d,  $J$  = 3.2 Hz, 1H, *H*-4), 3.44 (s, 3H), 2.01 (br, 2H, *OH*-2, *OH*-4), 1.29 (d,  $J$  = 6.8 Hz, 3H, *H*-6);  $^{13}\text{C}$  NMR (100 MHz,  $\text{CDCl}_3$ )  $\delta$  154.7, 131.2, 119.3, 99.6, 77.8, 70.5, 68.9, 67.0, 65.6, 55.5, 16.0; IR (KBr)  $\nu$  = 3575, 3345, 2986, 2941, 2839, 1740, 1458, 1389, 1277, 1199, 1159, 1089, 1054, 960, 786, 764  $\text{cm}^{-1}$ ; HRMS (ESI)  $m/z$  calcd for  $\text{C}_{11}\text{H}_{18}\text{NaO}_7$   $[\text{M}+\text{Na}]^+$  285.0950, found 285.0946.

Methyl 3-*O*-9-fluorenylmethyloxycarbonyl- $\alpha$ -L-fucopyranoside (**3ah**)

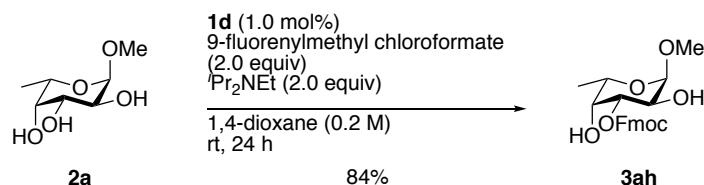

9-Fluorenylmethyl chloroformate (51.7 mg, 0.400 mmol, 2.0 equiv) was added to a stirred mixture of methyl  $\alpha$ -L-fucopyranoside (**2a**) (35.6 mg, 0.200 mmol, 1.0 equiv), boronic acid **1d** (0.002 M in 1,4-dioxane, 1.00 mL, 2.00  $\mu\text{mol}$ , 1.0 mol%) and *N,N*-diisopropylethylamine (69.6  $\mu\text{L}$ , 0.400 mmol, 2.0 equiv) under ambient atmosphere. After stirring for 24 hours, the reaction was quenched by addition of 1 M HCl (2.0 mL) and the resulting mixture was extracted two times with ethyl acetate. The combined organic layers were washed with sat.  $\text{NaHCO}_3$  aq., water and brine, dried over  $\text{Na}_2\text{SO}_4$ , filtered, and concentrated *in vacuo*. The resulting crude material was purified by silica gel chromatography (hexane : ethyl acetate = 2 : 1) to give **3ah** (67.1 mg, 0.168 mmol, 84%) as a white solid.

Data for **3ah**:  $R_f$  = 0.50 (1/2 *n*-hexane / EtOAc); mp 174-178  $^{\circ}\text{C}$ ;  $[\alpha]_{\text{D}}^{23}$   $-121.3^{\circ}$  ( $c$  = 1.0,  $\text{CHCl}_3$ );  $^1\text{H}$  NMR (400 MHz,  $\text{CDCl}_3$ )  $\delta$  7.77 (d,  $J$  = 7.2 Hz, 2H), 7.63 (t,  $J$  = 7.2 Hz, 2H), 7.41 (t,  $J$  = 7.2 Hz, 2H), 7.32 (t,  $J$  = 7.2 Hz, 2H), 4.89 (dd,  $J$  = 10.0, 2.8 Hz, 1H, *H*-3), 4.81 (d,  $J$  = 3.6 Hz, 1H, *H*-1), 4.51 (dd,  $J$  = 10.4, 7.2 Hz, 1H), 4.42 (dd,  $J$  = 10.4, 7.2 Hz, 1H), 4.28 (t,  $J$  = 7.2 Hz, 1H), 4.06 (dd,  $J$  = 10.0, 3.6 Hz, 1H, *H*-2), 3.98 (q,  $J$  = 6.8 Hz, 1H, *H*-5), 3.90 (d,  $J$  = 2.8 Hz, 1H, *H*-4), 3.44 (s, 3H), 2.06 (br, 2H, *OH*-2, *OH*-4), 1.30 (d,  $J$  = 6.8 Hz, 3H, *H*-6);  $^{13}\text{C}$  NMR (100 MHz,  $\text{CDCl}_3$ )  $\delta$  154.9, 143.3, 143.1, 141.3, 141.2, 127.9, 127.2, 125.2, 125.1, 120.04, 120.02, 99.6, 77.9, 70.5, 70.1, 67.0, 65.7, 55.5, 46.7, 16.0; IR (KBr)  $\nu$  = 3510, 3429, 2988, 2936, 2892, 2839, 1728, 1450, 1393, 1282, 1202, 1164, 1096, 1058, 969, 759, 736  $\text{cm}^{-1}$ ; HRMS (ESI)  $m/z$  calcd for  $\text{C}_{22}\text{H}_{24}\text{NaO}_7$   $[\text{M}+\text{Na}]^+$  423.1420, found 423.1414.

## 9. Boronic acid catalyzed site-selective dibenzoylations (Scheme 4)

### Methyl 3,6-*O*-dibenzoyl- $\alpha$ -D-mannopyranoside (**3ai**)

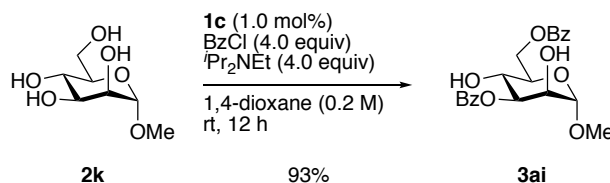

Benzoyl chloride (93.8  $\mu\text{L}$ , 0.800 mmol, 4.0 equiv) was added to a stirred mixture of methyl  $\alpha$ -D-mannopyranoside (**2k**) (38.8 mg, 0.200 mmol, 1.0 equiv), boronic acid **1c** (0.002 M in 1,4-dioxane, 1.00 mL, 2.00  $\mu\text{mol}$ , 1.0 mol%) and *N,N*-diisopropylethylamine (69.6  $\mu\text{L}$ , 0.400 mmol, 2.0 equiv) under ambient atmosphere. After stirring for 12 hours, the reaction was quenched by addition of 1 M HCl (2.0 mL) and the resulting mixture was extracted two times with ethyl acetate. The combined organic layers were washed with sat.  $\text{NaHCO}_3$  aq., water and brine, dried over  $\text{Na}_2\text{SO}_4$ , filtered, and concentrated *in vacuo*. The resulting crude material was purified by silica gel chromatography (hexane : ethyl acetate = 2 : 1) to give **3ai** (74.4 mg, 0.185 mmol, 93%) as a colorless oil.

Data for **3ai**:  $R_f$  = 0.31 (2/1 *n*-hexane / EtOAc);  $[\alpha]_{\text{D}}^{24}$  +61.9° ( $c$  = 1.0,  $\text{CHCl}_3$ );  $^1\text{H}$  NMR (400 MHz,  $\text{CDCl}_3$ )  $\delta$  8.08–8.05 (m, 4H), 7.58–7.53 (m, 2H), 7.44–7.39 (m, 4H), 5.36 (dd,  $J$  = 9.8, 3.2 Hz, 1H, *H*-3), 4.78 (d,  $J$  = 1.8 Hz, 1H, *H*-1), 4.73 (dd,  $J$  = 12.0, 5.2 Hz, 1H, *H*-6), 4.61 (dd,  $J$  = 12.0, 2.2 Hz, 1H, *H*-6), 4.17 (dd,  $J$  = 3.2, 1.8 Hz, 1H, *H*-2), 4.13 (t,  $J$  = 9.8 Hz, 1H, *H*-4), 4.61 (ddd,  $J$  = 9.8, 5.2, 2.2 Hz, 1H, *H*-5), 3.42 (s, 3H);  $^{13}\text{C}$  NMR (100 MHz,  $\text{CDCl}_3$ )  $\delta$  167.0, 166.7, 133.4, 133.2, 129.9, 129.8, 129.7, 129.5, 128.41, 128.39, 100.7, 75.0, 70.9, 69.3, 65.9, 64.0, 55.0; IR (neat)  $\nu$  = 3454, 1714, 1452, 1277, 1117, 1059, 757, 712  $\text{cm}^{-1}$ ; HRMS (ESI)  $m/z$  calcd for  $\text{C}_{21}\text{H}_{22}\text{NaO}_8$   $[\text{M}+\text{Na}]^+$  425.1212, found 425.1202.

Methyl 3,6-*O*-dibenzoyl-β-D-galactopyranoside (**3aj**)<sup>6</sup>

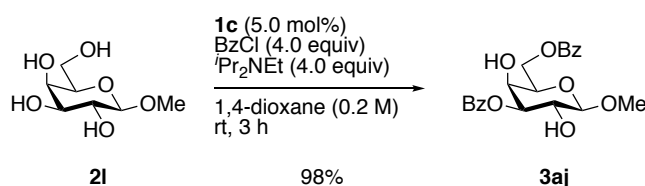

Benzoyl chloride (46.9  $\mu\text{L}$ , 0.400 mmol, 4.0 equiv) was added to a stirred solution of methyl  $\beta$ -D-galactopyranoside (**2l**) (19.4 mg, 0.10 mmol, 1.0 equiv), boronic acid **1c** (1.01 mg, 5.00  $\mu\text{mol}$ , 5.0 mol%) and *N,N*-diisopropylethylamine (69.6  $\mu\text{L}$ , 0.400 mmol, 4.0 equiv) in dry 1,4-dioxane (0.5 mL, 0.2 M) under ambient atmosphere. After stirring for 3 hours, the reaction was quenched by addition of 1 M HCl (2.0 mL) and the resulting mixture was extracted two times with ethyl acetate. The combined organic layers were washed with sat.  $\text{NaHCO}_3$  aq., water and brine, dried over  $\text{Na}_2\text{SO}_4$ , filtered, and concentrated *in vacuo*. The resulting crude material was purified by silica gel chromatography (hexane : ethyl acetate = 2 : 1) to give **3aj** (29.3 mg, 0.0982 mmol, 98%) as a white solid.

Data for **3aj**:  $R_f$  = 0.13 (2/1 *n*-hexane / EtOAc); mp 132–134  $^{\circ}\text{C}$ ;  $[\alpha]_{\text{D}}^{23}$   $-5.6^{\circ}$  ( $c$  = 1.0,  $\text{CHCl}_3$ );  $^1\text{H}$  NMR (400 MHz,  $\text{CDCl}_3$ )  $\delta$  8.10–8.08 (m, 2H), 8.04–8.02 (m, 2H), 7.59–7.55 (m, 2H), 7.46–7.42 (m, 4H), 5.14 (dd,  $J$  = 10.1, 3.3 Hz, 1H, *H*-3), 4.65 (dd,  $J$  = 11.4, 6.6 Hz, 1H, *H*-6), 4.56 (dd,  $J$  = 11.4, 6.6 Hz, 1H, *H*-6), 4.36 (d,  $J$  = 7.7 Hz, 1H, *H*-1), 4.24 (br, 1H, *H*-4), 4.05 (dd,  $J$  = 10.1, 7.7 Hz, 1H, *H*-2), 3.97 (t,  $J$  = 6.6 Hz, 1H, *H*-5), 3.59 (s, 3H);  $^{13}\text{C}$  NMR (100 MHz,  $\text{CDCl}_3$ )  $\delta$  166.5, 166.1, 133.5, 133.3, 129.9, 129.7, 129.5, 129.4, 128.46, 128.45, 104.3, 75.4, 72.3, 69.4, 67.2, 62.6, 57.2; IR (KBr)  $\nu$  = 3548, 2920, 1715, 1450, 1284, 1121, 1070, 712, 772  $\text{cm}^{-1}$ ; HRMS (ESI)  $m/z$  calcd for  $\text{C}_{21}\text{H}_{22}\text{NaO}_8$   $[\text{M}+\text{Na}]^+$  425.1212, found 425.1202.

## 10. Control experiments for mechanistic studies (Scheme 5)

### a) PhB(OH)<sub>2</sub> / *N*-methylimidazole as catalyst

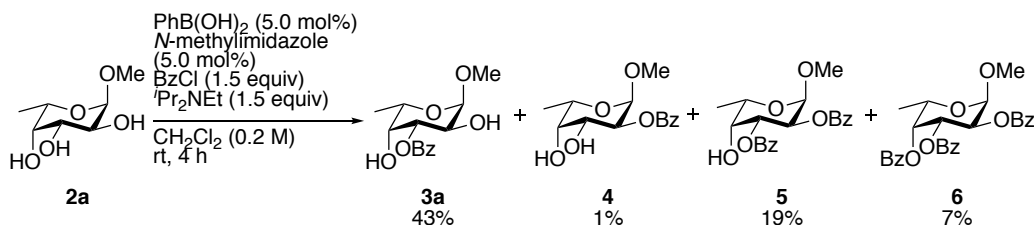

Benzoyl chloride (17.6  $\mu\text{L}$ , 0.150 mmol, 1.5 equiv) was added to a stirred mixture of methyl  $\alpha$ -L-fucopyranoside (**2a**) (17.8 mg, 0.100 mmol, 1.0 equiv), phenyl boronic acid (0.610 mg, 5.00  $\mu\text{mol}$ , 5.0 mol%), *N*-methylimidazole (0.01 M in dichloromethane, 0.5 mL, 5.00  $\mu\text{mol}$ , 5 mol%) and *N,N*-diisopropylethylamine (26.1  $\mu\text{L}$ , 0.150 mmol, 1.5 equiv) under ambient atmosphere. After stirring for 4 hours, the reaction was quenched by addition of 1 M HCl (2.0 mL) and the resulting mixture was extracted two times with ethyl acetate. The combined organic layers were washed with sat.  $\text{NaHCO}_3$  aq., water and brine, dried over  $\text{Na}_2\text{SO}_4$ , filtered, and concentrated *in vacuo*. The yields were determined by  $^1\text{H}$ -NMR analysis of crude product mixture using 1,1,2,2-tetrachloroethane as an internal standard.

### b) **1d** as catalyst with $\text{NaHCO}_3$

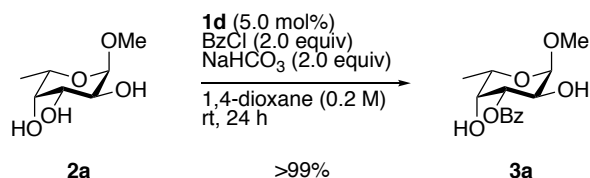

Benzoyl chloride (46.9  $\mu\text{L}$ , 0.400 mmol, 2.0 equiv) was added to a stirred solution of methyl  $\alpha$ -L-fucopyranoside (**2a**) (35.6 mg, 0.200 mmol, 1.0 equiv), boronic acid **1d** (2.32 mg, 10.0  $\mu\text{mol}$ , 5.0 mol%), and  $\text{NaHCO}_3$  (33.6 mg, 0.400 mmol, 2.0 equiv) in dry 1,4-dioxane (1.0 mL, 0.2 M) under ambient atmosphere. After stirring for 4 hours, the reaction was quenched by addition of 1 M HCl (2.0 mL) and the resulting mixture was extracted two times with ethyl acetate. The combined organic layers were washed with sat.  $\text{NaHCO}_3$  aq., water and brine, dried over  $\text{Na}_2\text{SO}_4$ , filtered, and concentrated *in vacuo*. The yield was determined by  $^1\text{H}$ -NMR analysis of crude product mixture using 1,1,2,2-tetrachloroethane as an internal standard.



## Preparation of 7

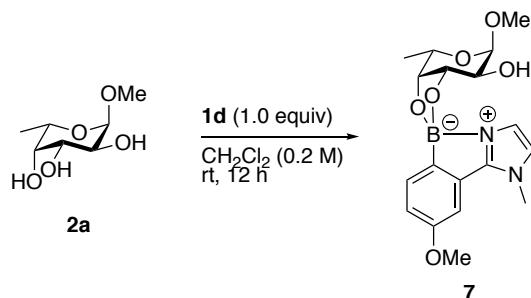

Methyl  $\alpha$ -L-fucopyranoside (**2a**) (17.6 mg, 0.100 mmol, 1.0 equiv) and boronic acid **1d** (23.2 mg, 0.100 mmol, 1.0 equiv) were dissolved in dry dichloromethane (0.5 mL, 0.2 M) under ambient atmosphere. After stirring for 12 hours, the resulting mixture was concentrated *in vacuo*. The resulting crude material was used in the next reaction without further purification.

Data for **7**:  $[\alpha]_{\text{D}}^{25} -67.3^\circ$  ( $c = 1.0$ ,  $\text{CHCl}_3$ );  $^1\text{H}$  NMR (400 MHz,  $\text{CDCl}_3$ )  $\delta$  7.53 (d,  $J = 8.0$  Hz, 1H), 7.09 (d,  $J = 0.8$  Hz, 1H), 6.98 (d,  $J = 1.6$  Hz, 1H), 6.89 (dd,  $J = 8.0, 1.6$  Hz, 1H), 6.80 (d,  $J = 0.8$  Hz, 1H), 4.84 (br, 1H,  $H$ -1), 4.34 (t,  $J = 5.2$  Hz, 1H,  $H$ -3), 4.19–4.15 (m, 2H,  $H$ -4,  $H$ -5), 4.02 (br, 1H,  $H$ -2), 3.85 (s, 3H), 3.81 (s, 3H), 3.48 (s, 3H), 2.62 (br, 1H,  $\text{OH}$ -2), 1.32 (d,  $J = 6.4$  Hz, 1H);  $^{13}\text{C}$  NMR (100 MHz,  $\text{CDCl}_3$ )  $\delta$  159.6, 132.5, 131.6, 123.7, 121.2, 114.3, 107.7, 98.8, 75.9, 75.1, 71.1, 65.6, 55.5, 55.2, 34.5, 16.4; IR (neat)  $\nu = 3404, 2934, 1614, 1567, 1515, 1255, 1173, 1074, 982, 752\text{ cm}^{-1}$ ; HRMS (FAB)  $m/z$  calcd for  $\text{C}_{18}\text{H}_{24}^{11}\text{BN}_2\text{O}_6$   $[\text{M}+\text{H}]^+$  375.1727, found 375.1727.

c) **7** as catalyst

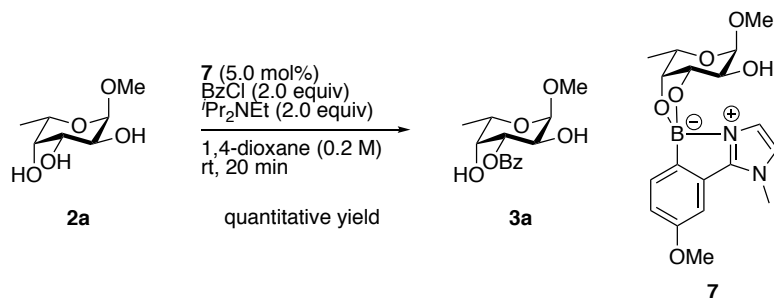

Benzoyl chloride (46.9  $\mu\text{L}$ , 0.400 mmol, 2.0 equiv) was added to a stirred solution of methyl  $\alpha$ -L-fucopyranoside (**2a**) (35.6 mg, 0.200 mmol, 1.0 equiv), **7** (3.74 mg, 10.0  $\mu\text{mol}$ , 5.0 mol%), and *N,N*-diisopropylethylamine (69.6  $\mu\text{L}$ , 0.400 mmol, 2.0 equiv) in dry 1,4-dioxane (1.0 mL, 0.2 M) under ambient atmosphere. After stirring for 4 hours, the reaction was quenched by addition of 1 M HCl (2.0 mL) and the resulting mixture was extracted two times with ethyl acetate. The combined organic layers were washed with sat.  $\text{NaHCO}_3$  aq., water and brine, dried over  $\text{Na}_2\text{SO}_4$ , filtered, and concentrated *in vacuo*. The yield was determined by  $^1\text{H}$ -NMR analysis of crude product mixture using 1,1,2,2-tetrachloroethane as an internal standard.

# 11. $^1\text{H}$ , $^1\text{H}$ - $^1\text{H}$ COSY, $^{13}\text{C}$ NMR spectra

## 2-(2-Bromophenyl)imidazole (SI-11)

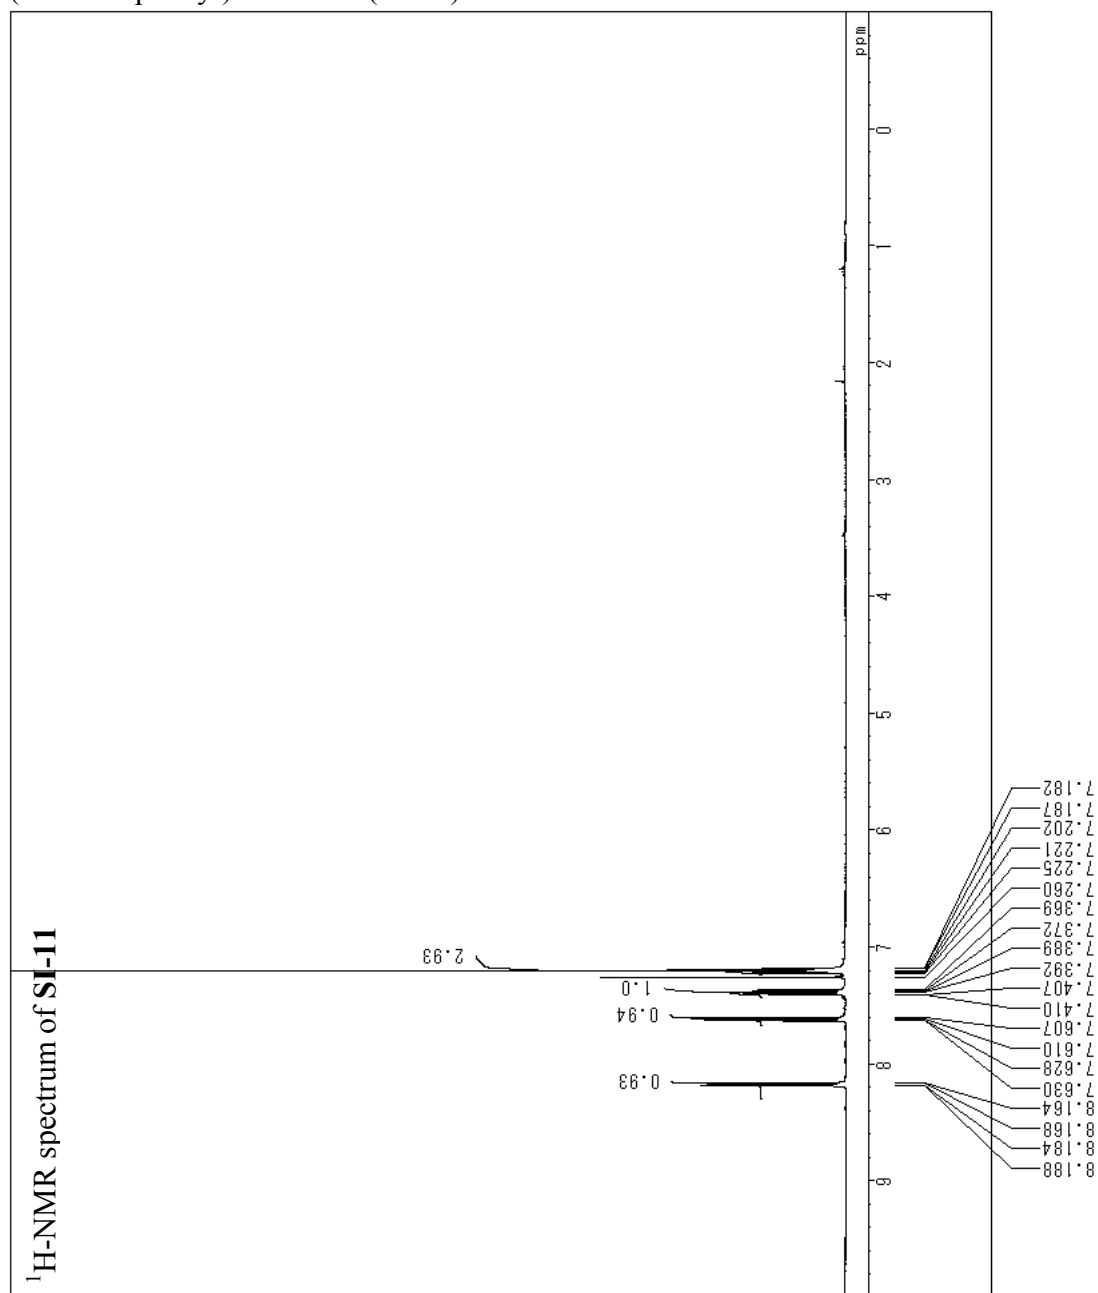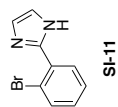

Comment: TAO-17-21-C-20160114\_01  
 Date: 2016/Jan/14  
 ObsNuc:  $^1\text{H}$   
 ExMode: PROTON\_001  
 ObsFreq: 400.28 MHz  
 Scan: 8  
 AcqTime: 2.5559 s  
 Acc. Interval: 5.5559 s  
 Spinning: 16.0 Hz  
 Temperature: 25.0  $^{\circ}\text{C}$   
 Solvent:  $\text{cdcl}_3$

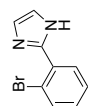

SI-11

Comment T40-17-23-C 20151221\_01  
 Date 2015/Dec/21  
 ObsNuc <sup>13</sup>C  
 ExMode CARBON\_001  
 ObsFreq 100.66 MHz  
 Scan 256  
 AcqTime 1.3631 s  
 Acc. Interval 3.3631 s  
 Spinning 20.0 Hz  
 Temperature 25.0 °C  
 Solvent cdcl<sub>3</sub>

<sup>13</sup>C-NMR spectrum of SI-11

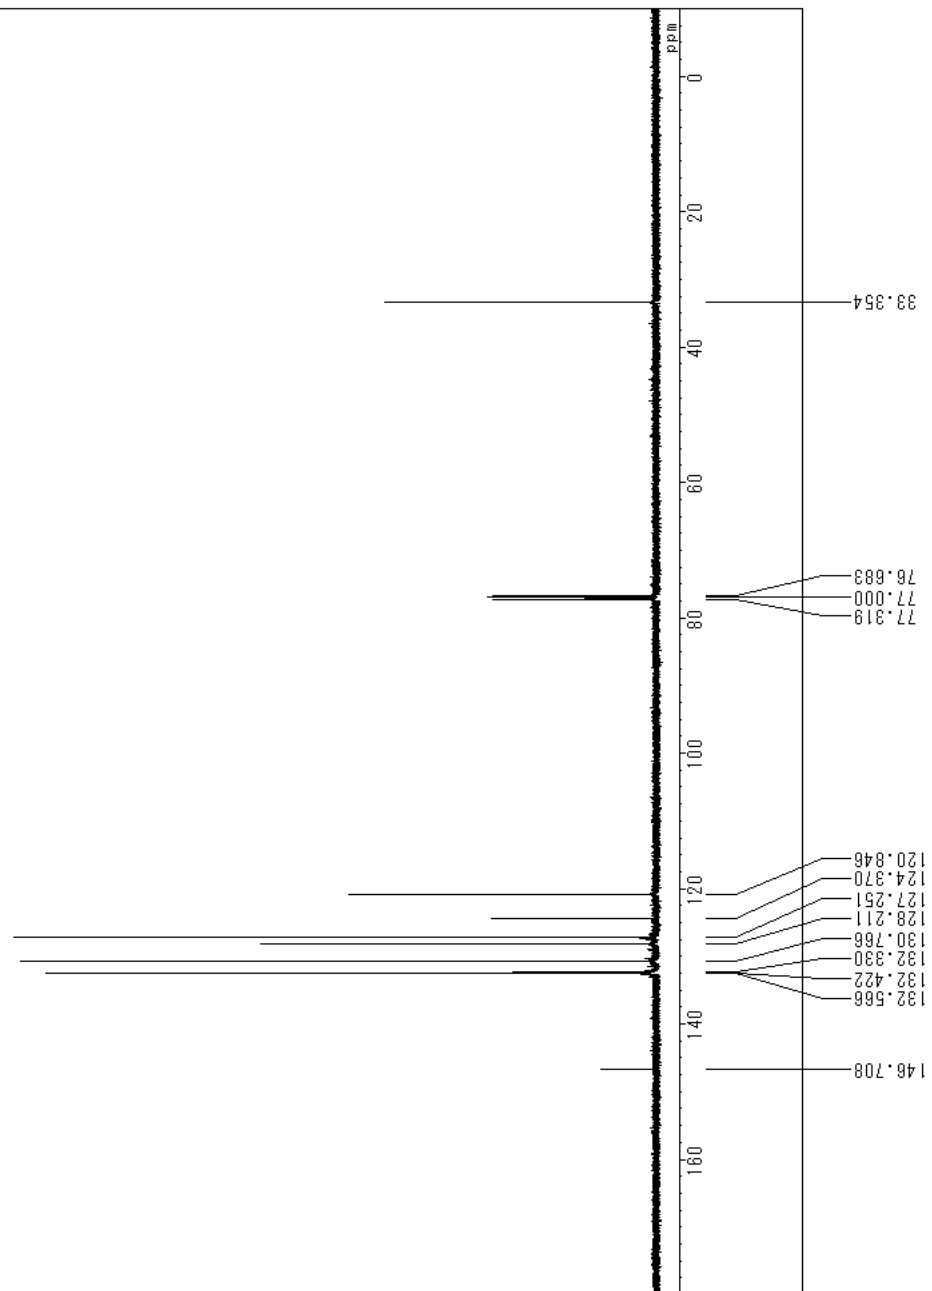

2-(2-Bromophenyl)-1-methyl-1*H*-imidazole (SI-12)

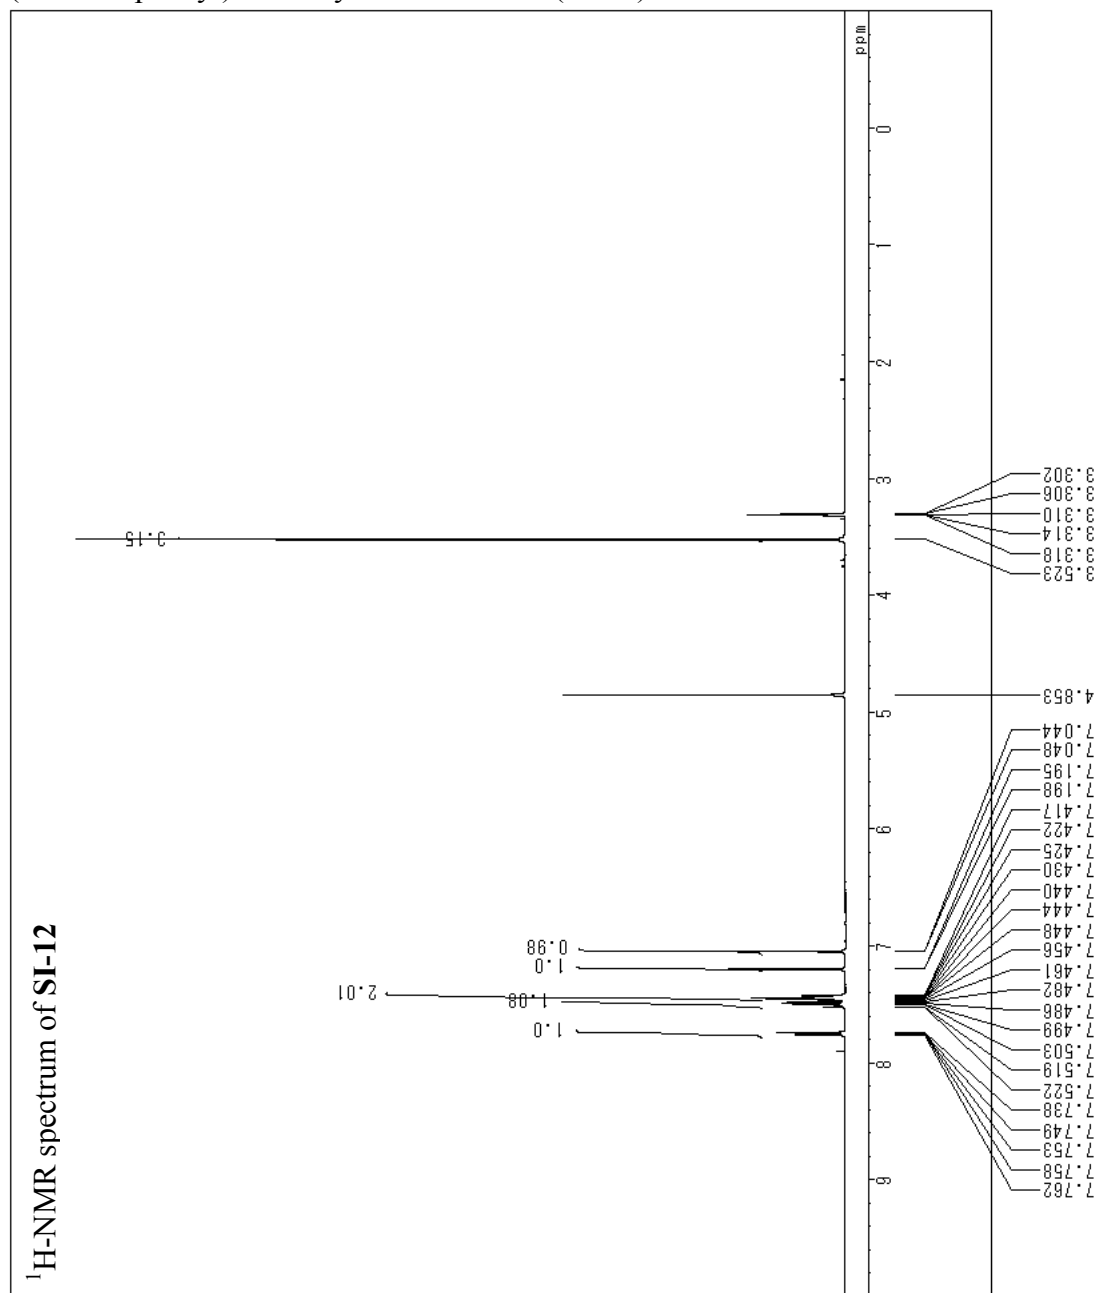

Comment BNO\_01\_003\_pure\_20170217  
 Date\_01 2017/Feb/17  
 ObsNuc <sup>1</sup>H  
 ExMode PROTON\_001  
 ObsFreq 400.28 MHz  
 Scan 32  
 AcqTime 2.5559 s  
 Acc. Interval 5.5559 s  
 Spinning 16.0 Hz  
 Temperature 25.0 °C  
 Solvent cdcl<sub>3</sub>

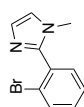

SI-12

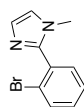

SI-12

Comment TMO-17-23-C-20151221\_01  
 Date 2015/Dec/21  
 ObsNuc <sup>13</sup>C  
 ExMode CARBON\_001  
 ObsFreq 100.66 MHz  
 Scan 256  
 AcqTime 1.3631 s  
 Acc. Interval 3.3631 s  
 Spinning 20.0 Hz  
 Temperature 25.0 °C  
 Solvent cdcl<sub>3</sub>

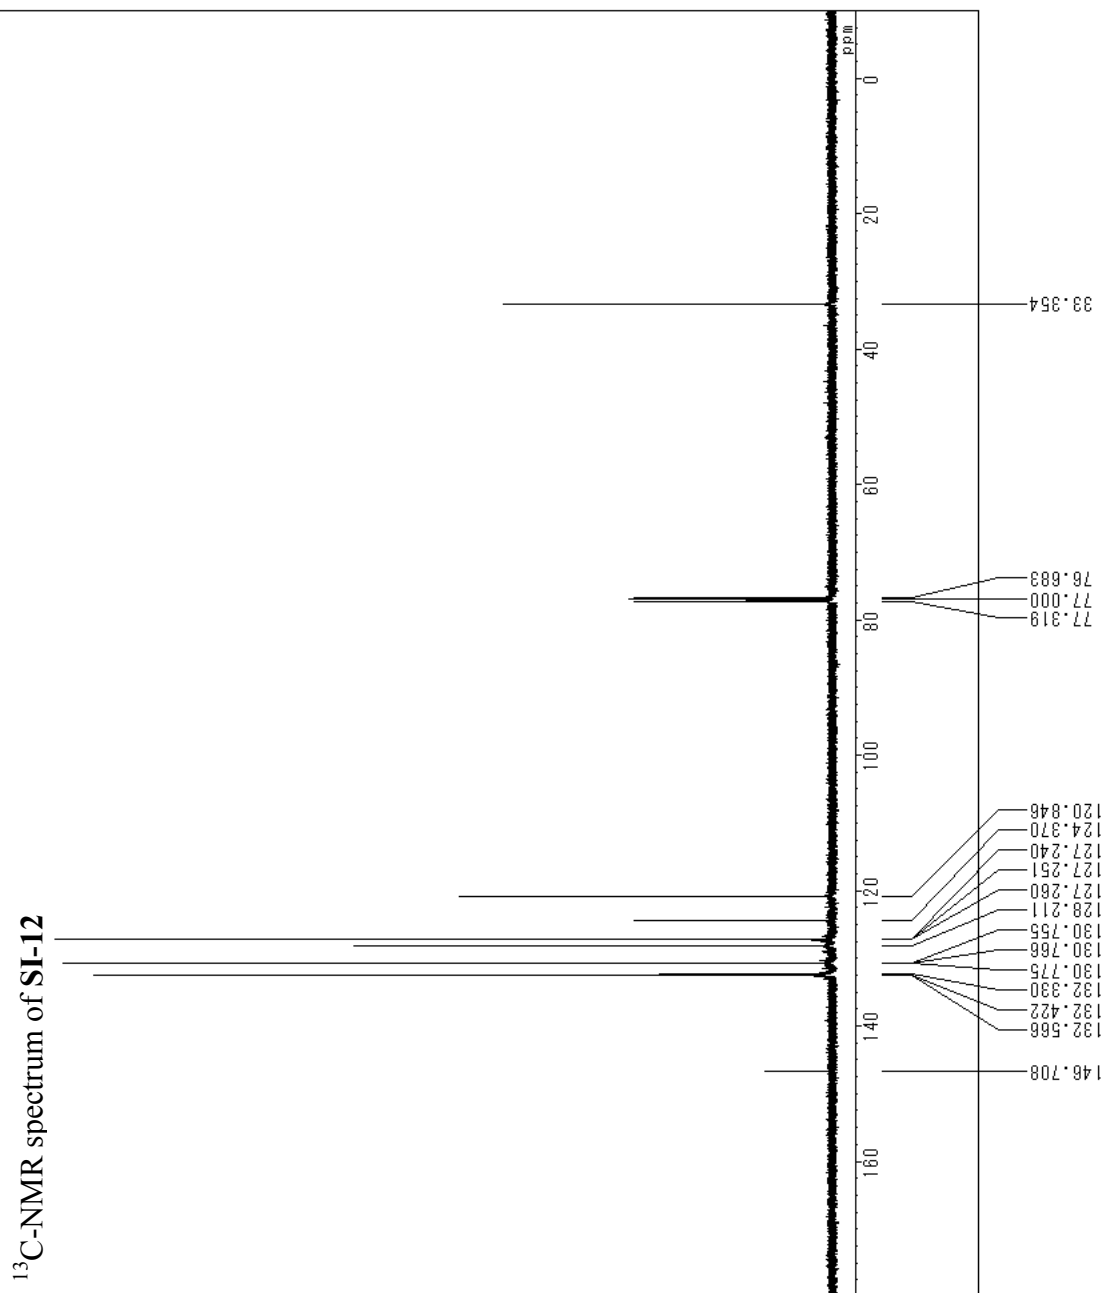

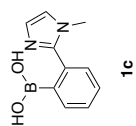

Comment cat\_H 13C\_20190118\_01  
 Date 2019/Jan/18  
 ObsNuc <sup>1</sup>H  
 ExMode PROTON\_001  
 ObsFreq 400.28 MHz  
 Scan 16  
 AcqTime 2.5559 s  
 Acc. Interval 5.5559 s  
 Spinning 18.0 Hz  
 Temperature 25.0 °C  
 Solvent cdso<sub>3</sub>d

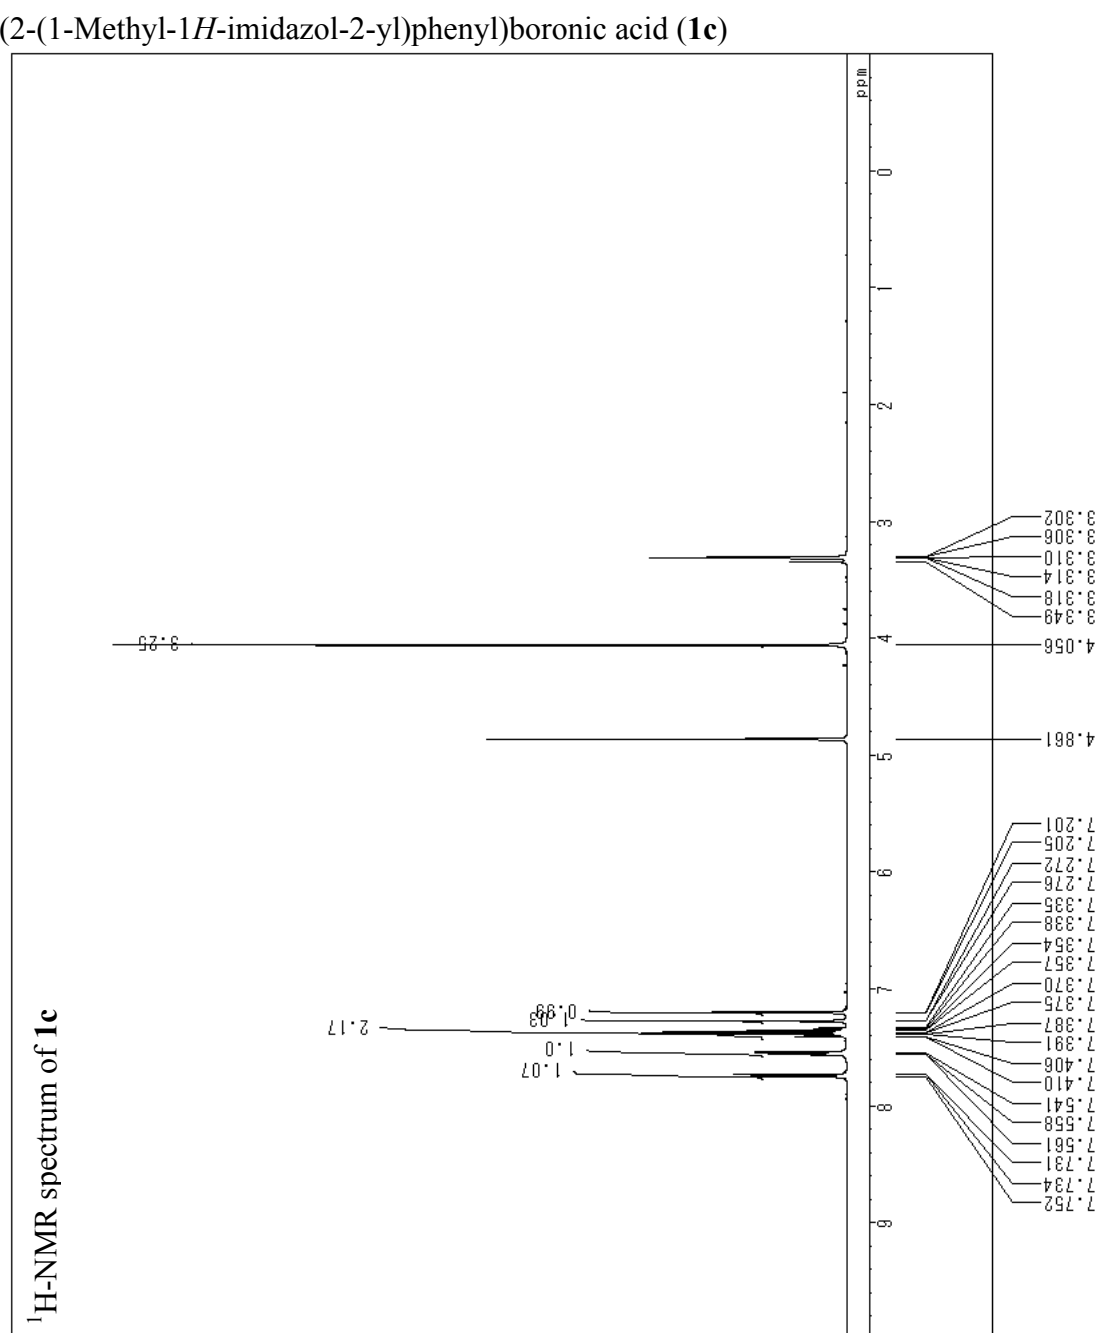

(2-(1-Methyl-1*H*-imidazol-2-yl)phenyl)boronic acid (**1c**)

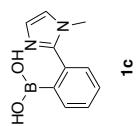

Comment cat\_H\_13C\_20190118\_01  
 Date 2019/Jan/18  
 ObsNuc <sup>13</sup>C  
 ExMode CARBON\_001  
 ObsFreq 100.66 MHz  
 Scan 1024  
 AcqTime 1.3631 s  
 Acc. Interval 3.3631 s  
 Spinning 20.0 Hz  
 Temperature 25.0 °C  
 Solvent cdso<sub>3</sub>d

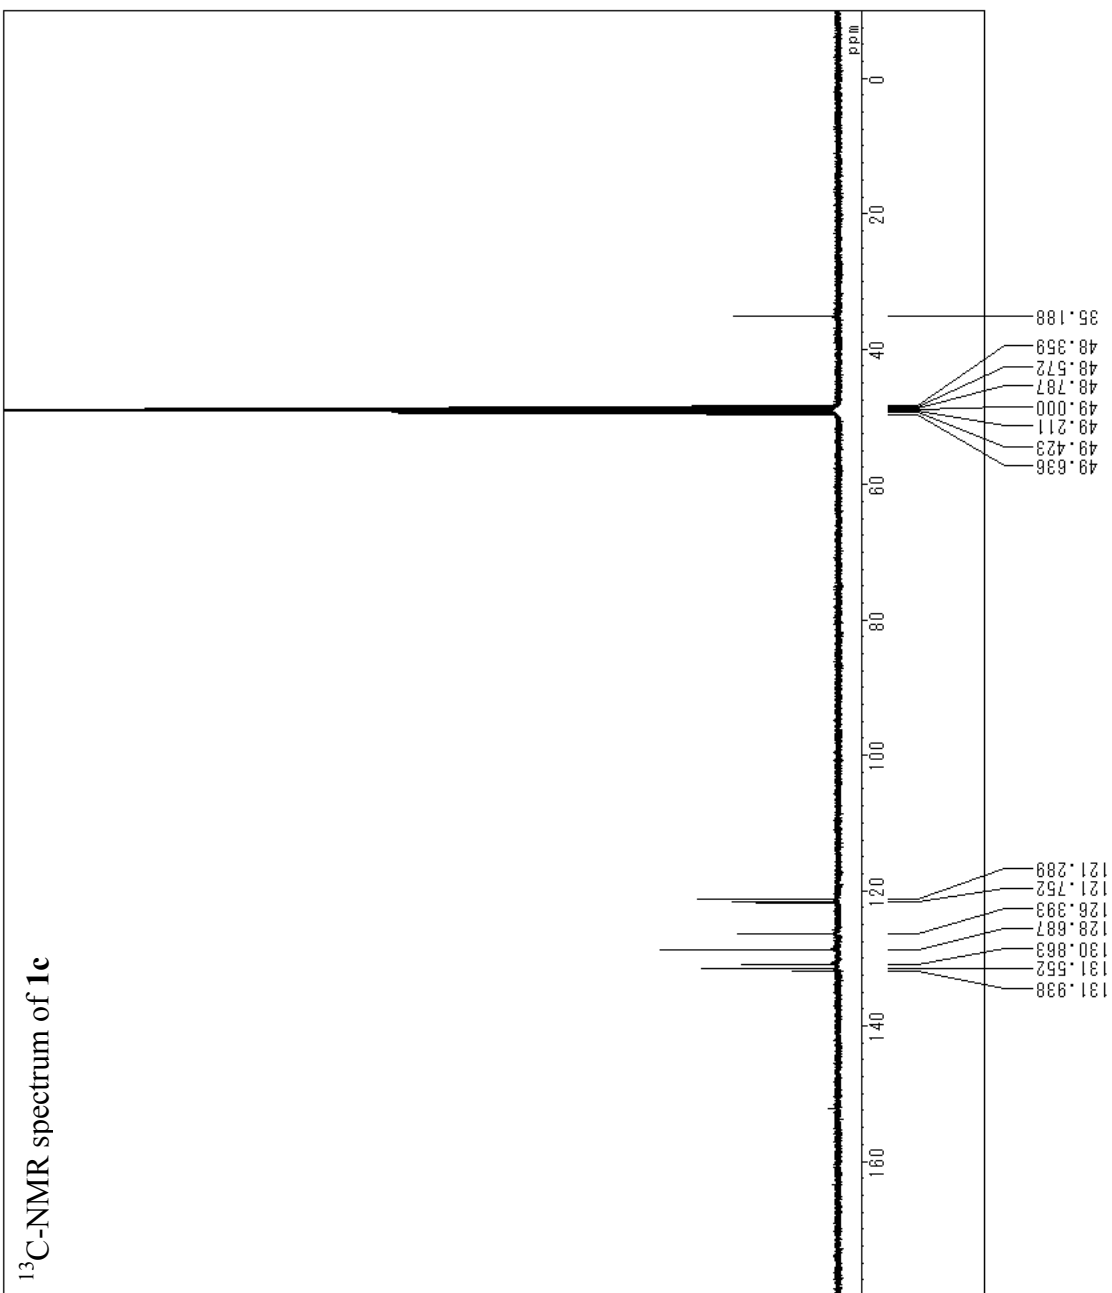



2- (2-Bromo-5-methoxyphenyl)-1*H*-imidazole (**SI-15**)

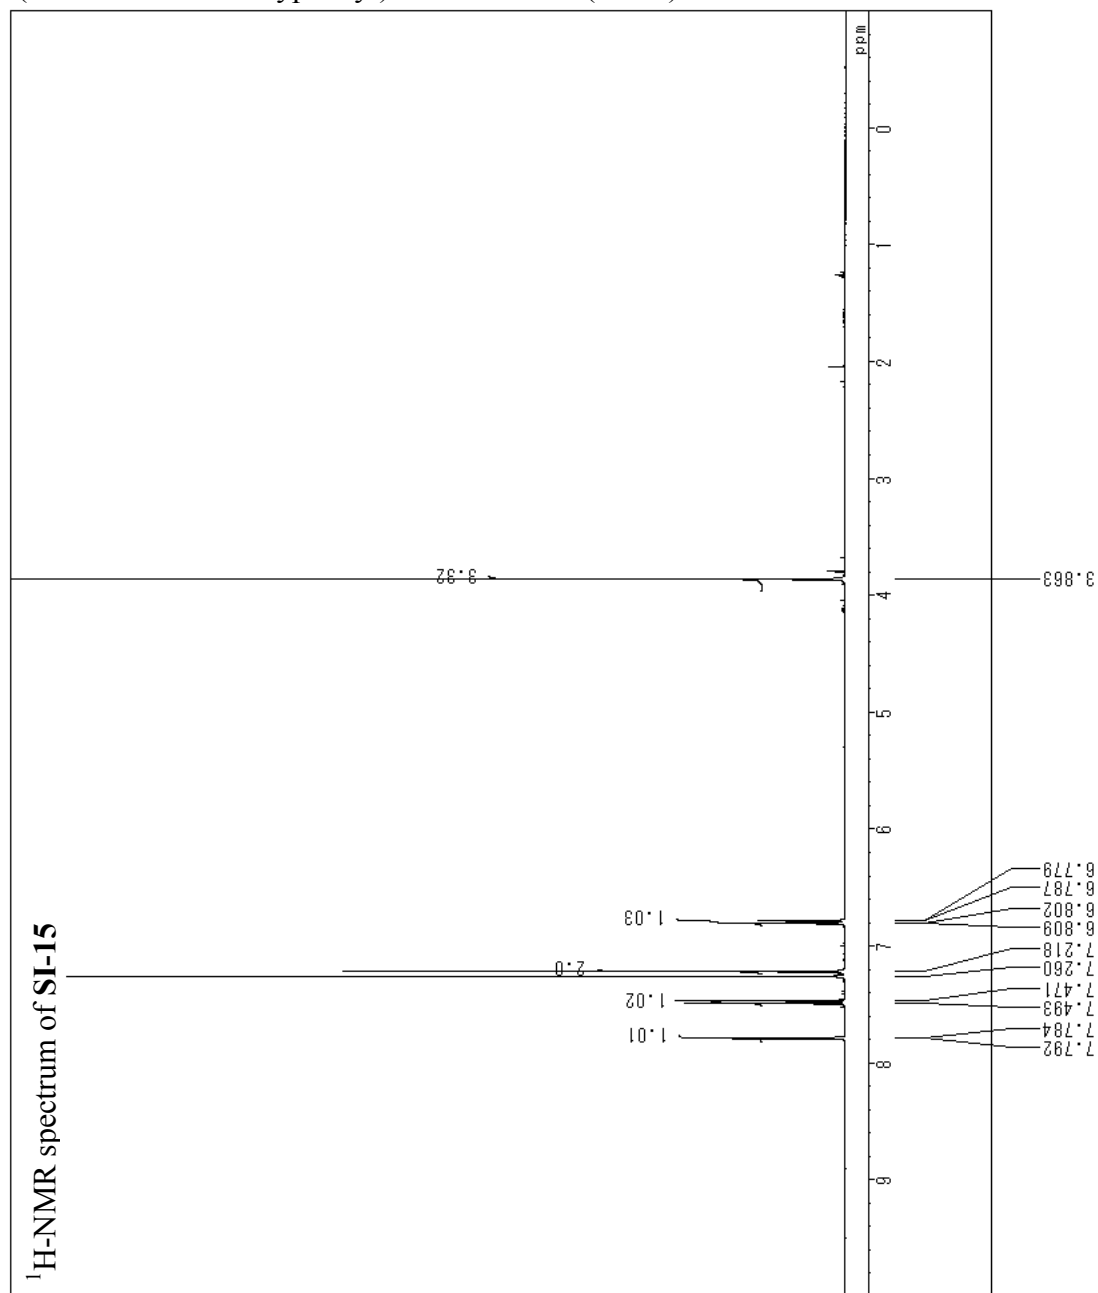

Comment TSV05039\_pure\_20160329\_01  
 Date 2016/Mar/29  
 ObsNuc <sup>1</sup>H  
 ExMode PROTON\_001  
 ObsFreq 399.45 MHz  
 Scan 32  
 AcqTime 2.589 s  
 Acc. Interval 5.589 s  
 Spinning 16.0 Hz  
 Temperature 25.0 °C  
 Solvent cdcl<sub>3</sub>

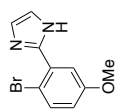

SI-15

# <sup>13</sup>C-NMR spectrum of SI-15

Comment TSV07003\_SM\_13C\_20180518  
 Date\_01 2018/May/18  
 ObsNuc <sup>13</sup>C  
 ExMode CARBON\_001  
 ObsFreq 100.45 MHz  
 Scan 256  
 AcqTime 1.3831 s  
 Acc. Interval 3.3831 s  
 Spinning 20.0 Hz  
 Temperature 25.0 °C  
 Solvent cdsod

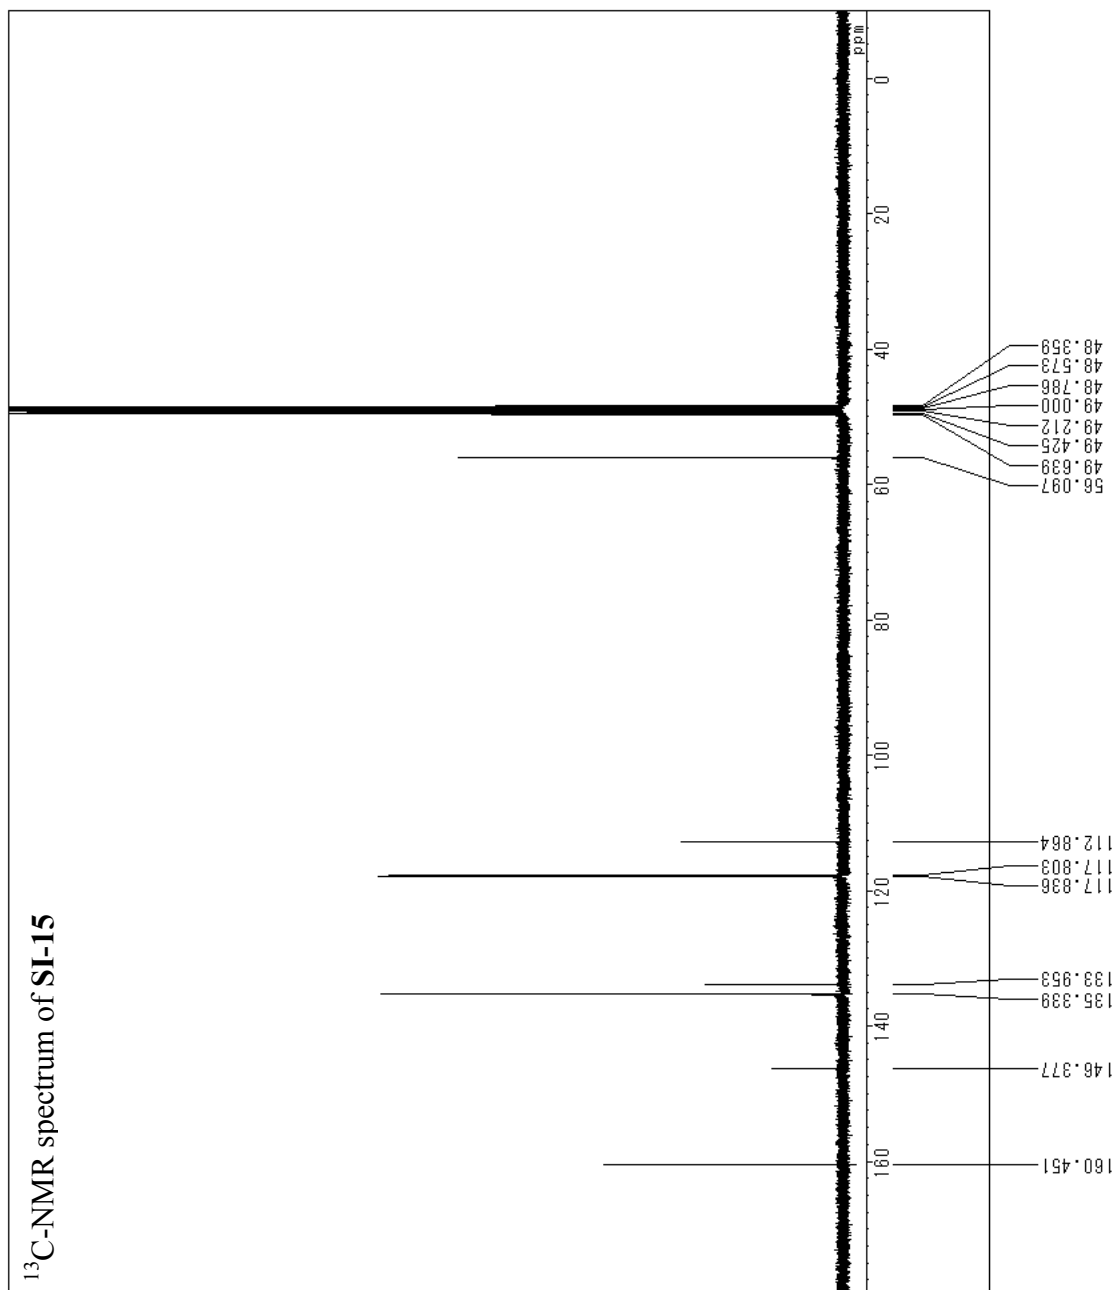

2-(2-Bromo-5-methoxyphenyl)-1-methyl-1*H*-imidazole (SI-16)

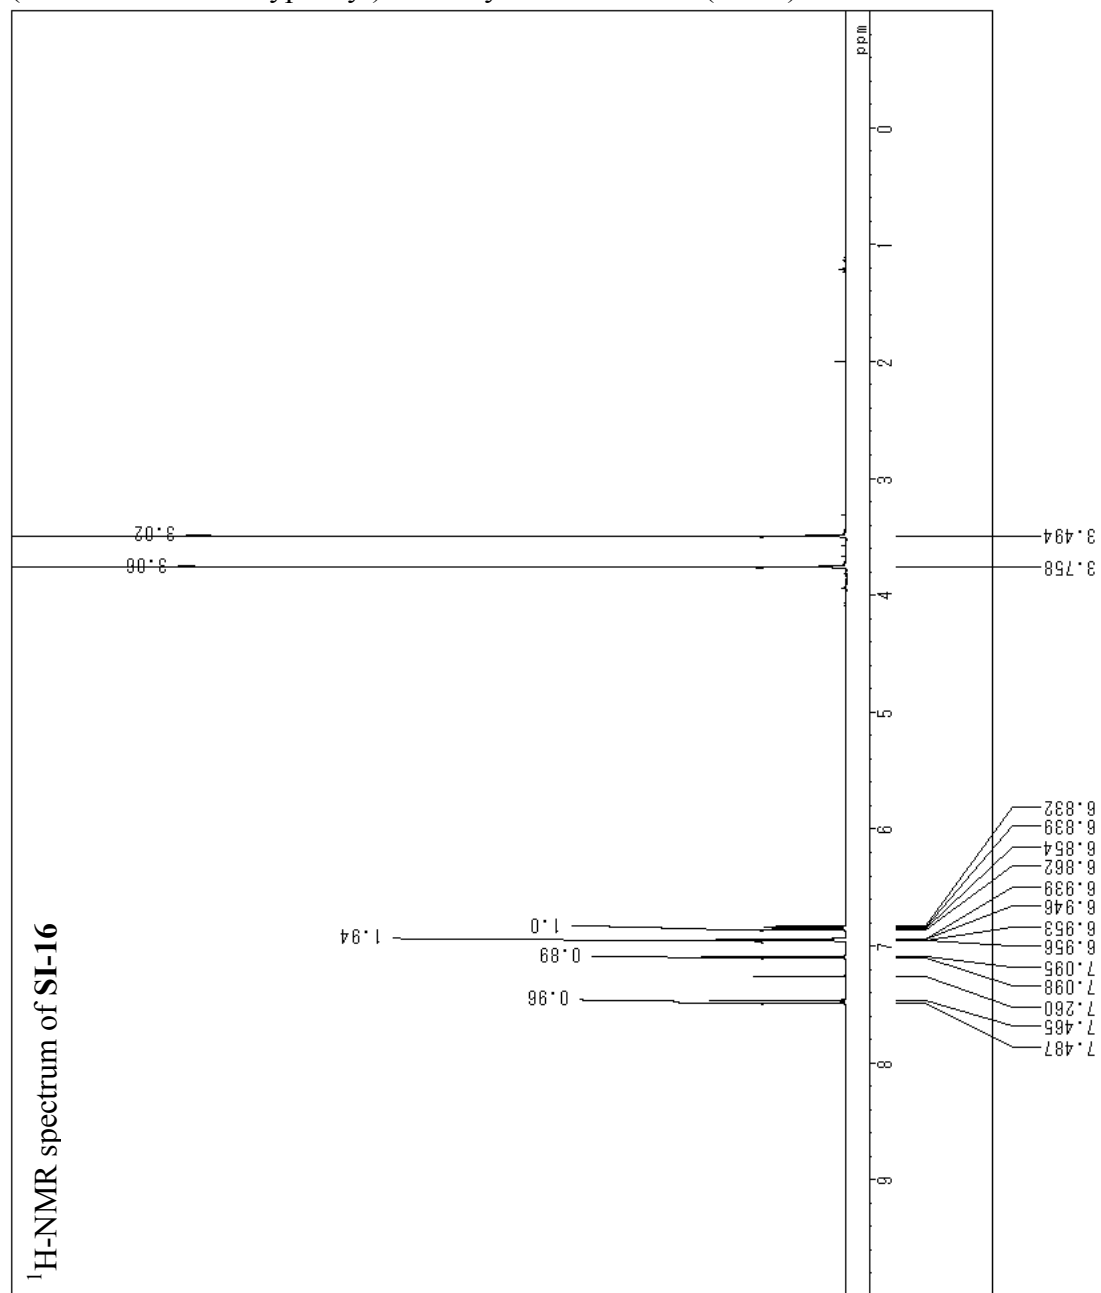

Comment TSV07003\_column\_20180512  
 Date\_01 2018/May/12  
 ObsNuc <sup>1</sup>H  
 ExMode PROTON\_001  
 ObsFreq 399.45 MHz  
 Scan 8  
 AcqTime 2.589 s  
 Acc. Interval 5.589 s  
 Spinning 16.0 Hz  
 Temperature 25.0 °C  
 Solvent cdcl3

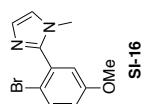

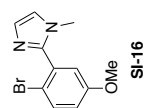

Comment TSV07003\_13C\_20180512\_01  
 Date 2018/May/12  
 ObsNuc <sup>13</sup>C  
 ExMode CARBON\_001  
 ObsFreq 100.45 MHz  
 Scan 256  
 AcqTime 1.3831 s  
 Acc. Interval 3.3831 s  
 Spinning 20.0 Hz  
 Temperature 25.0 °C  
 Solvent cdcl<sub>3</sub>

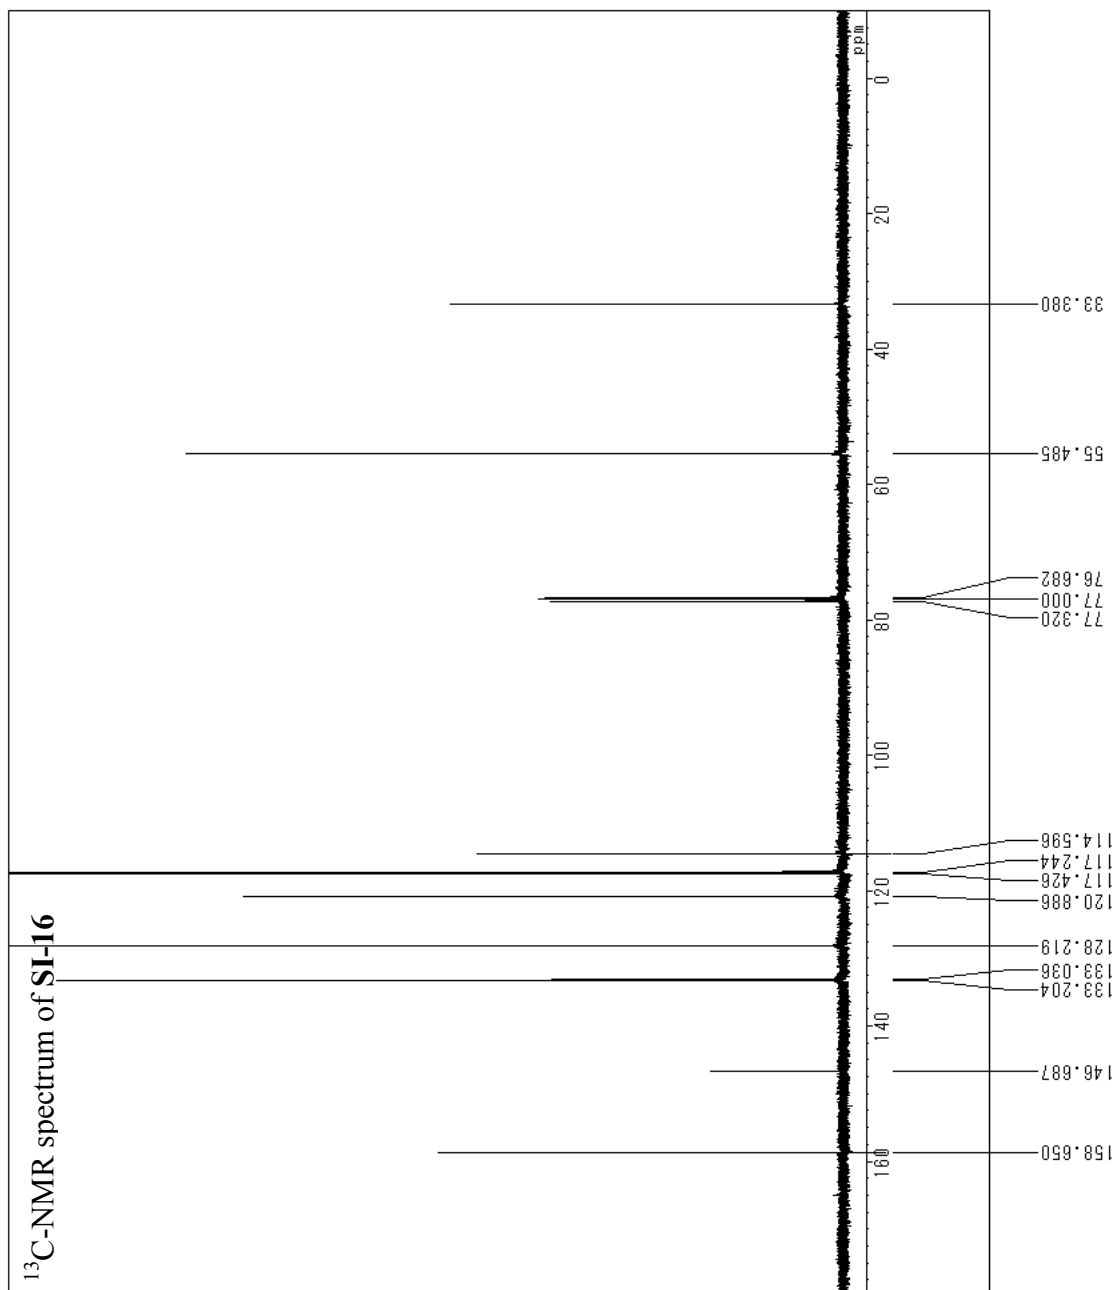

(4-Methoxy-2-(1-methyl-1*H*-imidazol-2-yl)phenyl)boronic acid (**1d**)

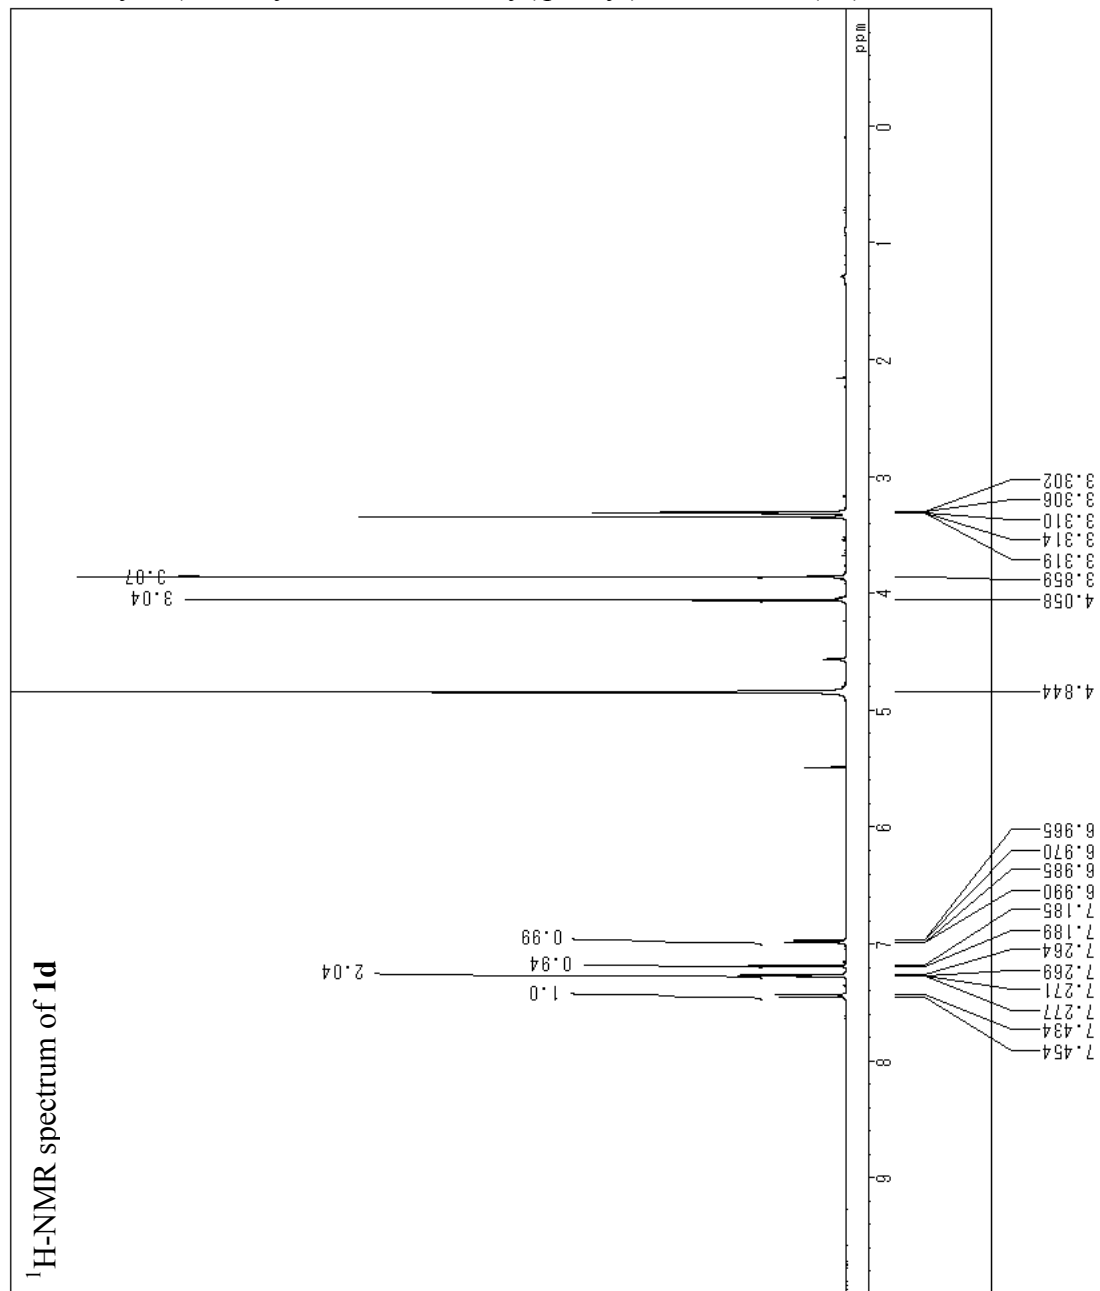

Comment\_RYU02033\_pure\_column\_20170612\_01  
 Date\_2017/Jun/12  
 ObsNuc\_1H  
 ExMode\_PROTON\_001  
 ObsFreq\_399.45 MHz  
 Scan\_16  
 AcqTime\_2.589 s  
 Acc. Interval\_5.589 s  
 Spinning\_16.0 Hz  
 Temperature\_25.0 °C  
 Solvent\_cdsod

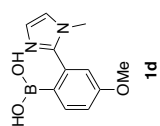

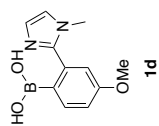

Comment\_RVU02033\_pure\_CARBON\_MeO  
 Date\_D\_20170813\_01  
 ObsNuc\_2017/Jun/13  
 ExMode\_13C  
 CARBON\_001  
 ObsFreq\_100.66 MHz  
 Scan\_720  
 AcqTime\_1.3831 s  
 Acc. Interval\_3.3831 s  
 Spinning\_20.0 Hz  
 Temperature\_25.0 °C  
 Solvent\_cdsod

<sup>13</sup>C-NMR spectrum of **1d**

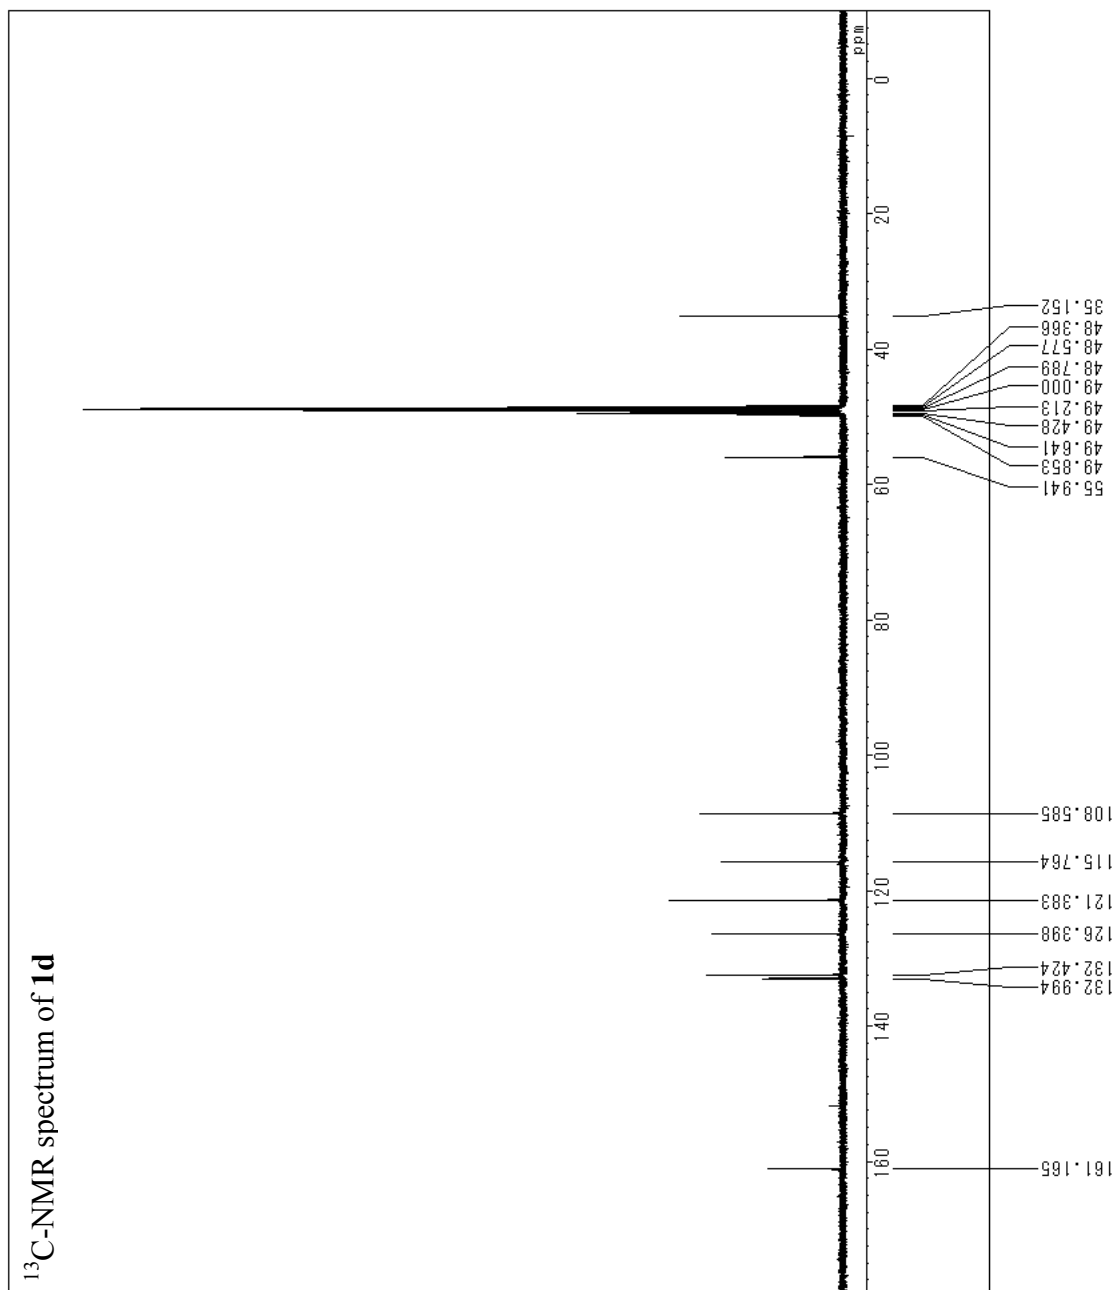

2-(2-Bromo-5-(trifluoromethyl)phenyl)-1*H*-imidazole (SI-19)

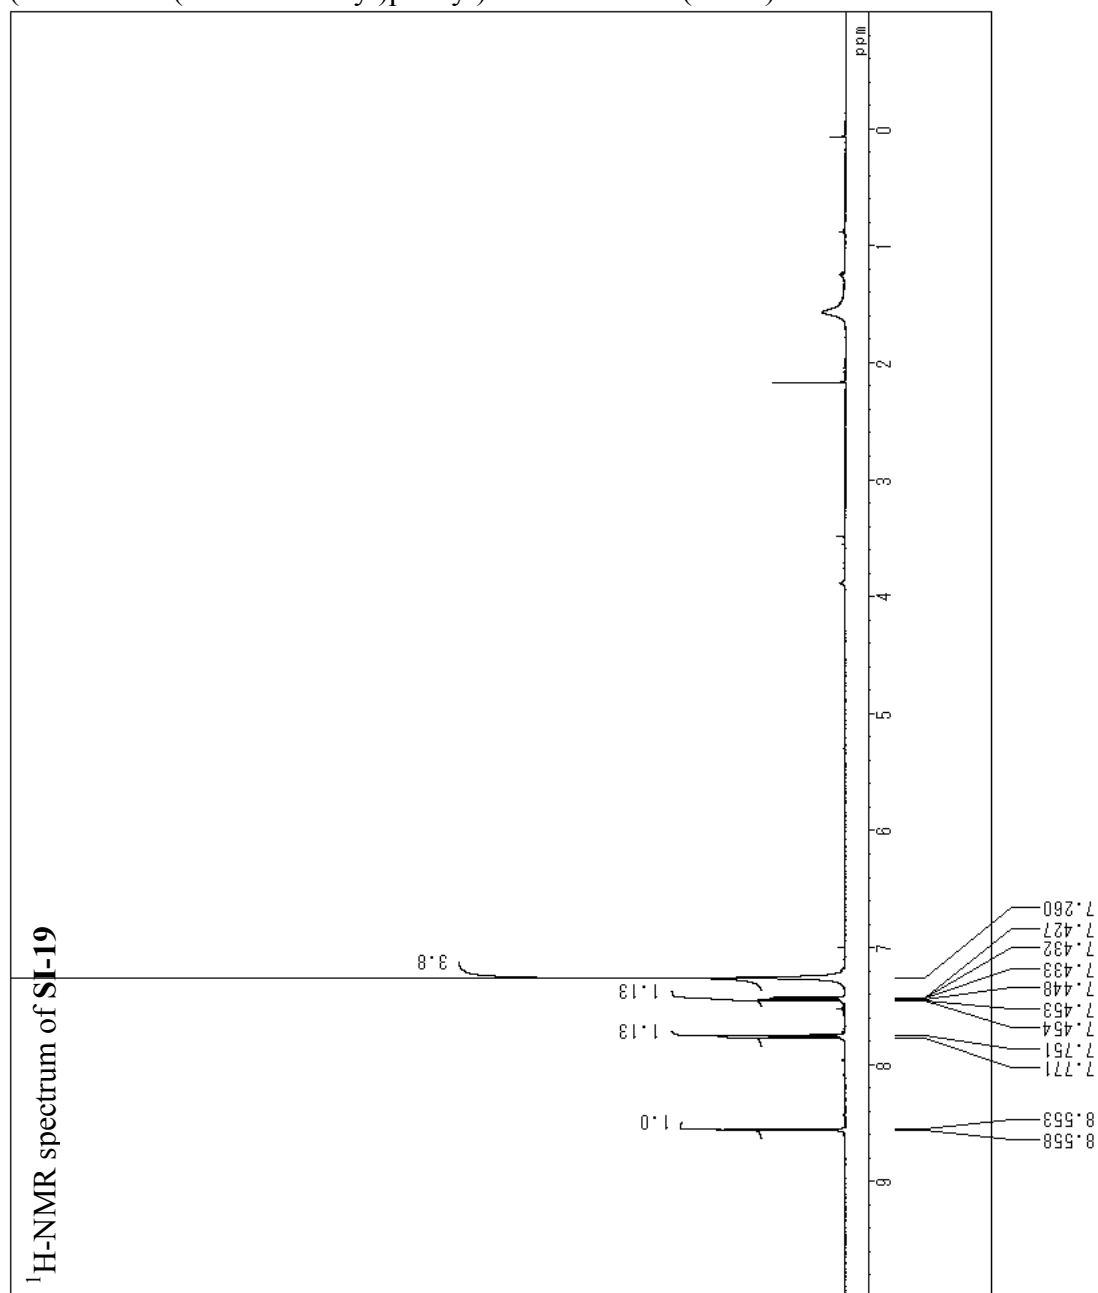

Comment TSV\_recrystal\_20170131\_0  
 Date 2017/Jan/31  
 ObsNuc <sup>1</sup>H  
 ExMode PROTON\_001  
 ObsFreq 300.45 MHz  
 Scan 32  
 AcqTime 2.569 s  
 Acc. Interval 5.589 s  
 Spinning 16.0 Hz  
 Temperature 25.0 °C  
 Solvent cdcl<sub>3</sub>

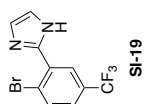

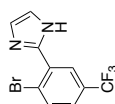

SI-19

Comment TSV06008.13C.20160406\_01  
 Date 2016/Apr/06  
 ObsNuc <sup>13</sup>C  
 ExMode CARBON\_001  
 ObsFreq 100.45 MHz  
 Scan 512  
 AcqTime 1.3631 s  
 Acc. Interval 3.3631 s  
 Spinning 20.0 Hz  
 Temperature 25.0 °C  
 Solvent cdcl<sub>3</sub>

<sup>13</sup>C-NMR spectrum of SI-19

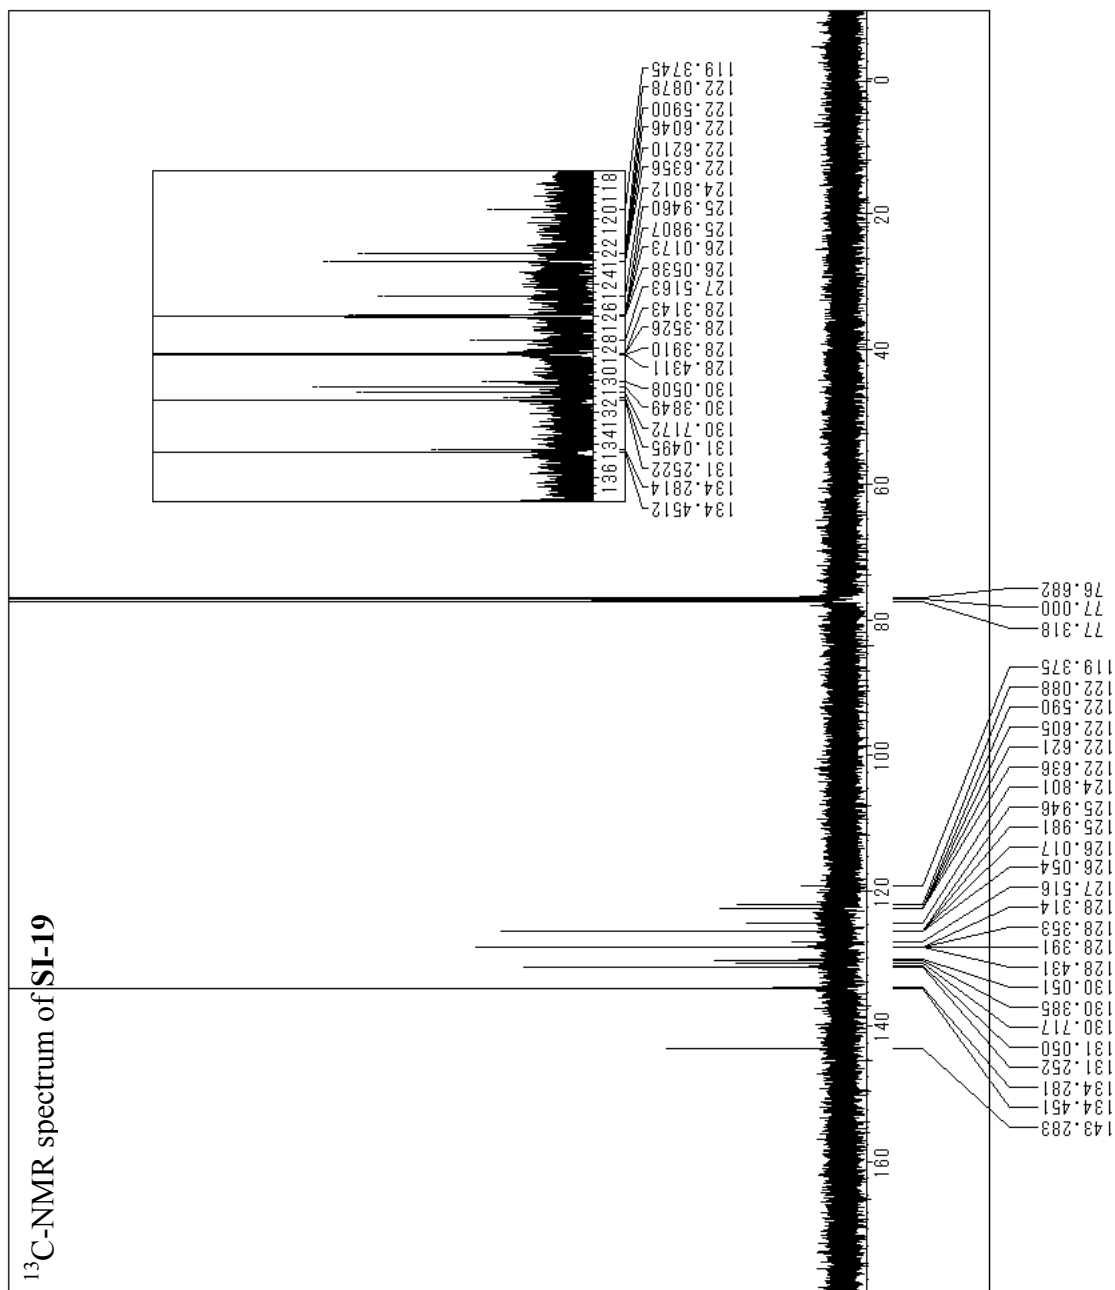



2-(2-Bromo-5-(trifluoromethyl)phenyl)-1-methyl-1*H*-imidazole (SI-20)

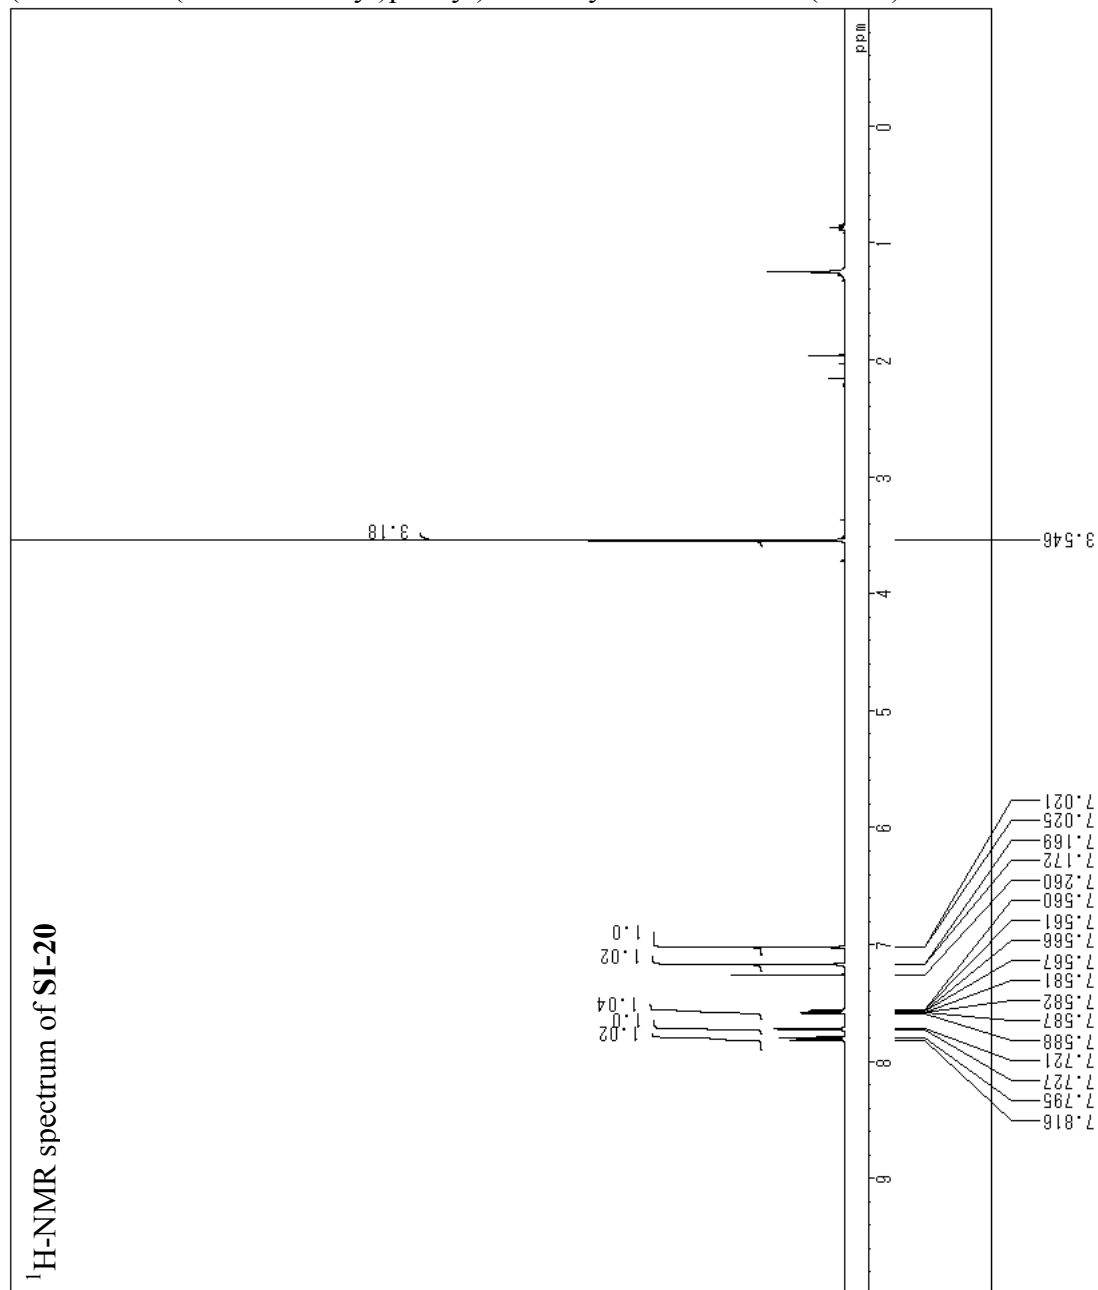

Comment: TSV06010\_column\_20160408  
 Date: 2016/Apr/08  
 ObsNuc: <sup>1</sup>H  
 ExMode: PROTON\_001  
 ObsFreq: 399.45 MHz  
 Scan: 16  
 AcqTime: 2.569 s  
 Acc. Interval: 5.589 s  
 Spinning: 16.0 Hz  
 Temperature: 25.0 °C  
 Solvent: cdcl<sub>3</sub>

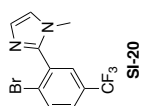

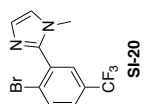

Comment TSV07010\_13C\_20180517\_01  
 Date 2018/May/17  
 ObsNuc <sup>13</sup>C  
 ExMode CARBON\_001  
 ObsFreq 100.45 MHz  
 Scan 256  
 AcqTime 1.3831 s  
 Acc. Interval 3.3831 s  
 Spinning 20.0 Hz  
 Temperature 25.0 °C  
 Solvent cdcl<sub>3</sub>

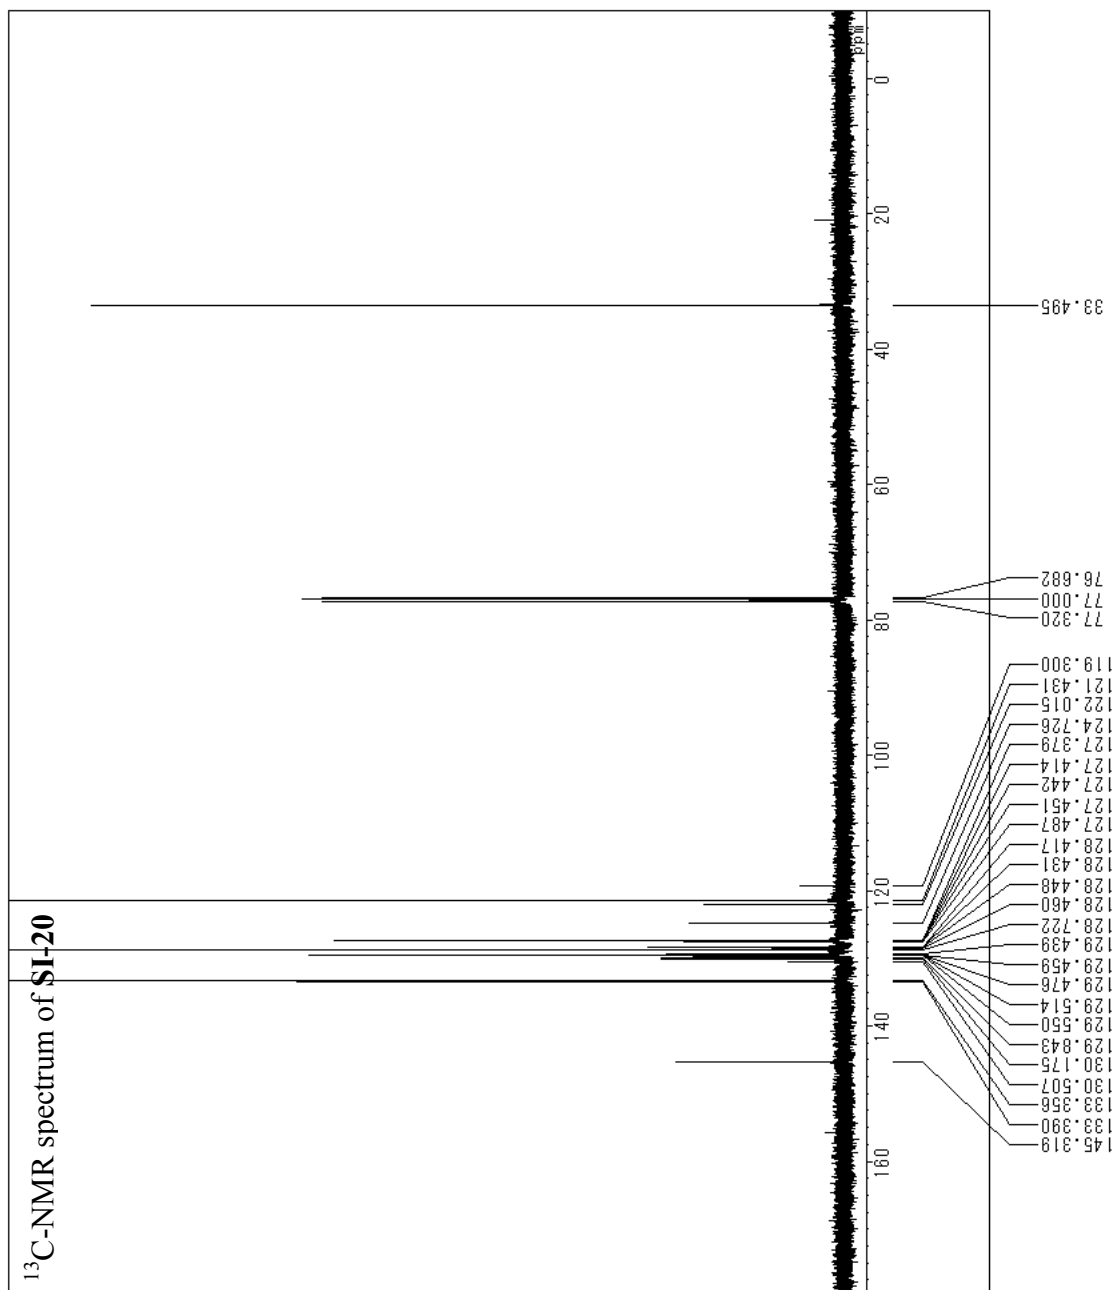

(2-(1-Methyl-1*H*-imidazol-2-yl)-4-(trifluoromethyl)phenyl)boronic acid (**1e**)

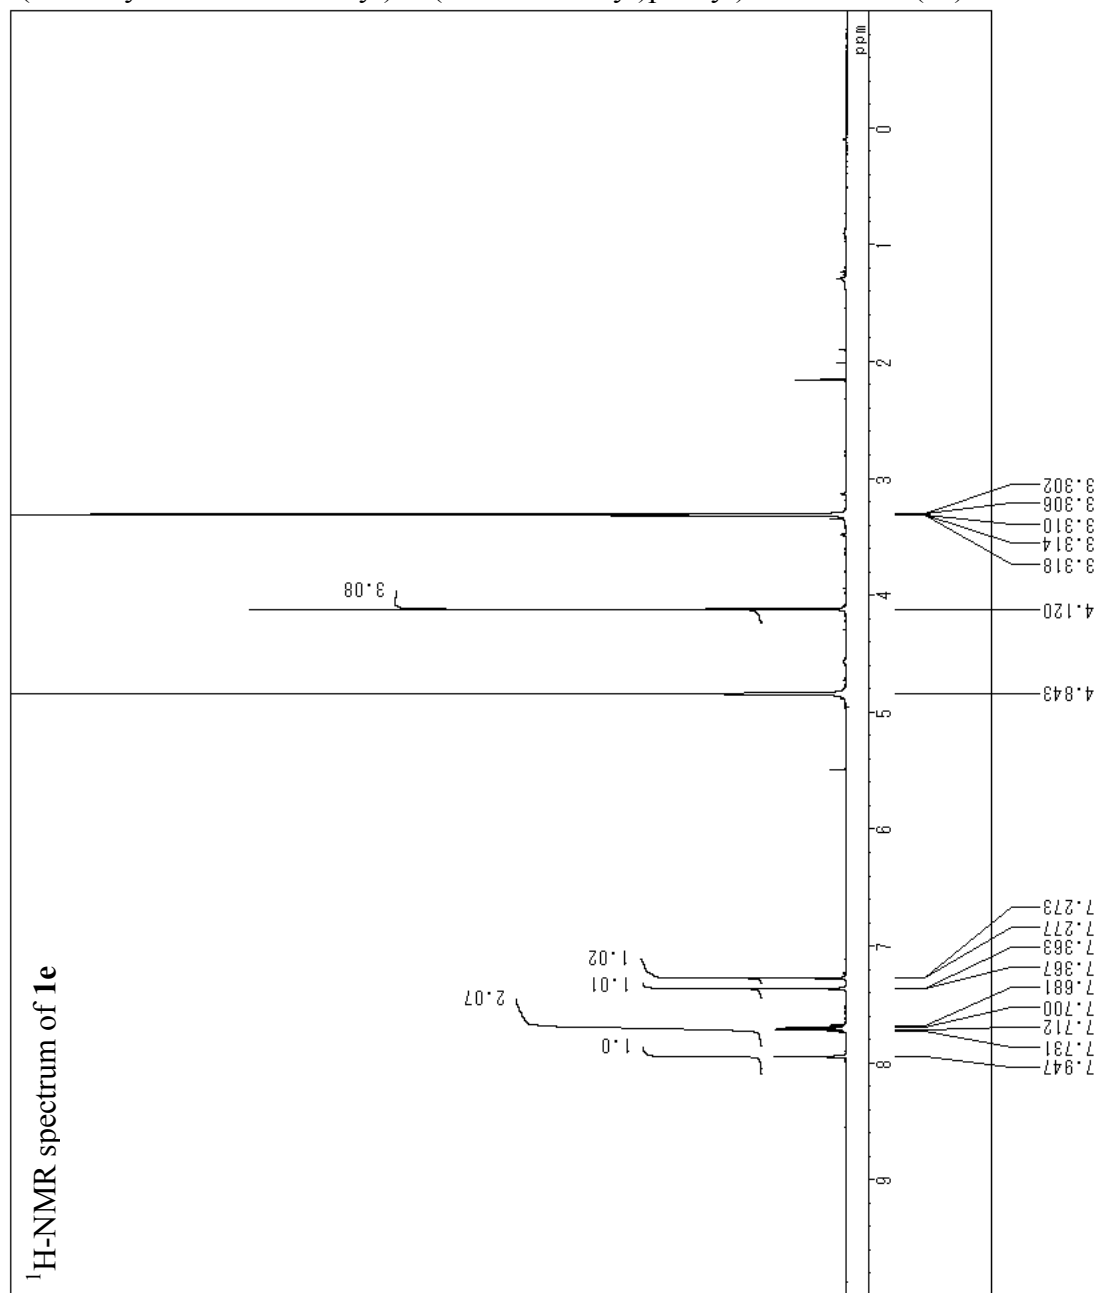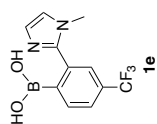

Comment ST001009\_pure\_20170224\_0  
 1  
 Date 2017/Feb/24  
 ObsNuc <sup>1</sup>H  
 ExMode PROTON\_001  
 ObsFreq 399.45 MHz  
 Scan 32  
 AcqTime 2.589 s  
 Acc. Interval 5.589 s  
 Spinning 16.0 Hz  
 Temperature 25.0 °C  
 Solvent cdcl<sub>3</sub>

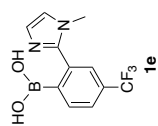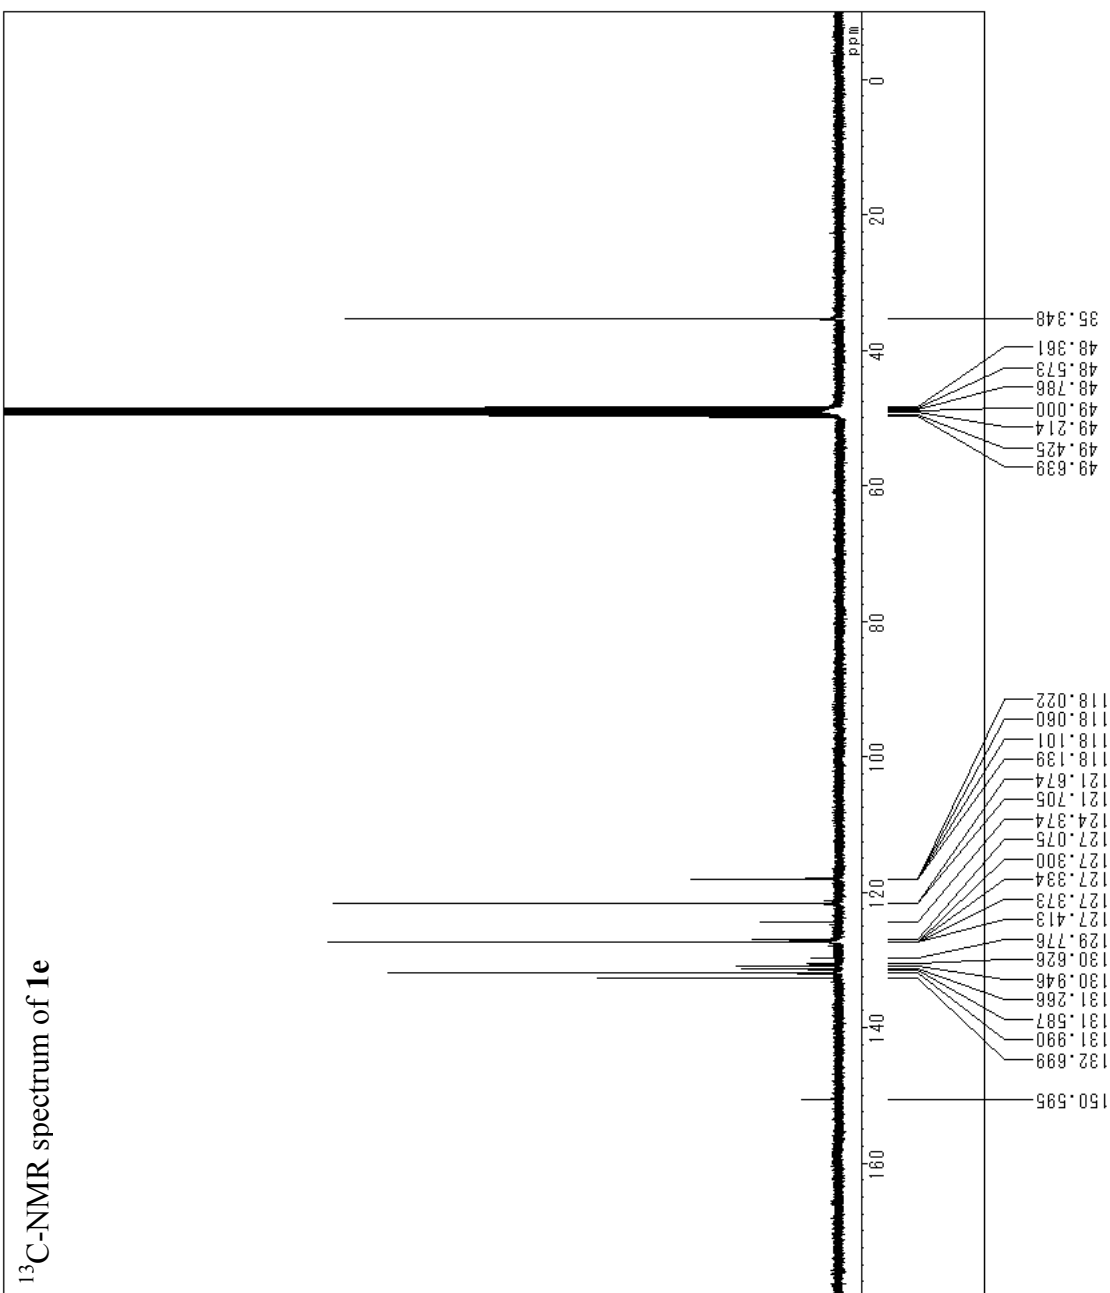

Comment TSV\_cat\_CF3\_imidazole\_13  
 C\_20180201\_01  
 Date 2018/Feb/01  
 ObsNuc <sup>13</sup>C  
 ExMode CARBON\_001  
 ObsFreq 100.45 MHz  
 Scan 1868  
 AcqTime 1.3631 s  
 Acc. Interval 3.3631 s  
 Spinning 20.0 Hz  
 Temperature 25.0 °C  
 Solvent cdsod

Methyl 3-*O*-benzoyl- $\alpha$ -L-fucopyranoside (**3a**)

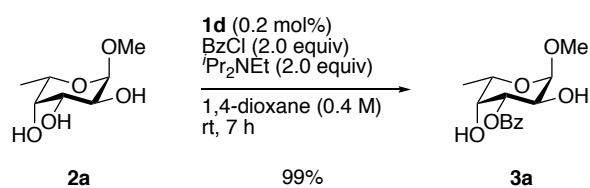

$^1\text{H}$ -NMR spectrum (crude reaction mixture in the presence of catalyst **1d**)

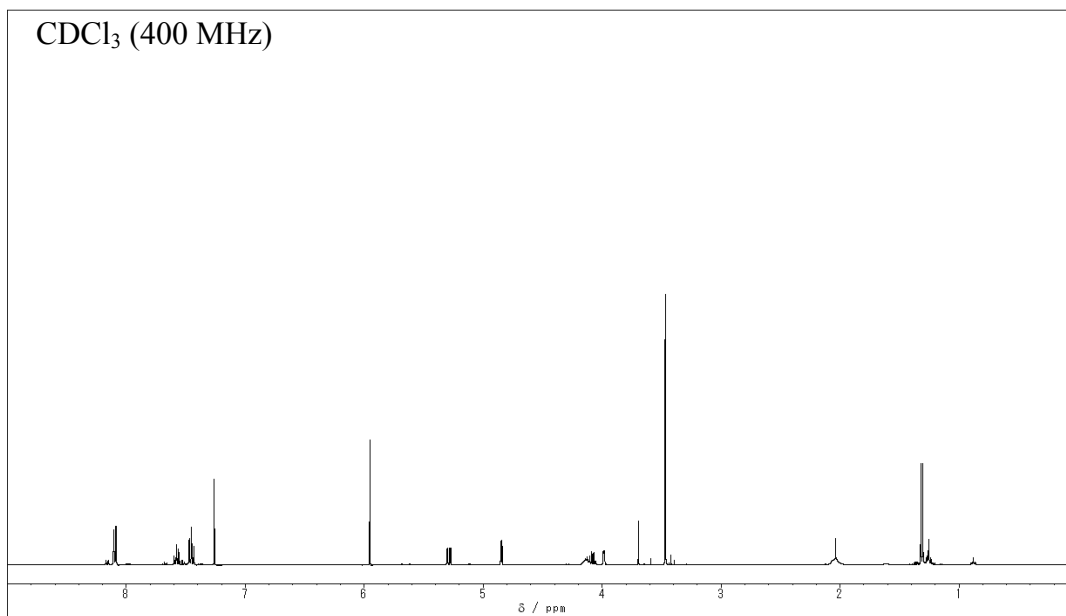

$^1\text{H}$ -NMR spectrum (crude reaction mixture in the absence of catalyst **1d**)

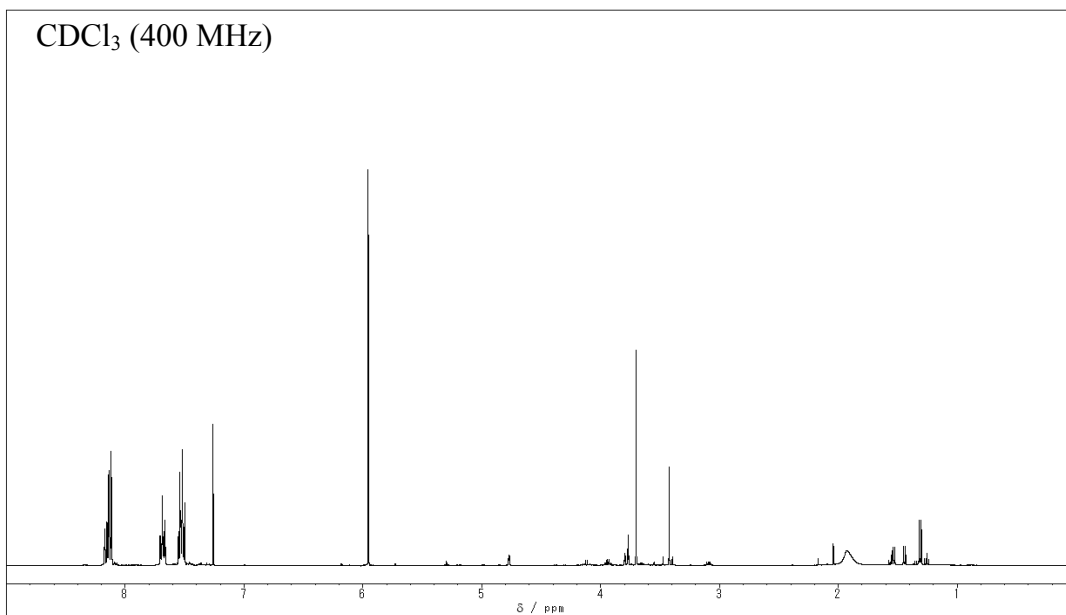

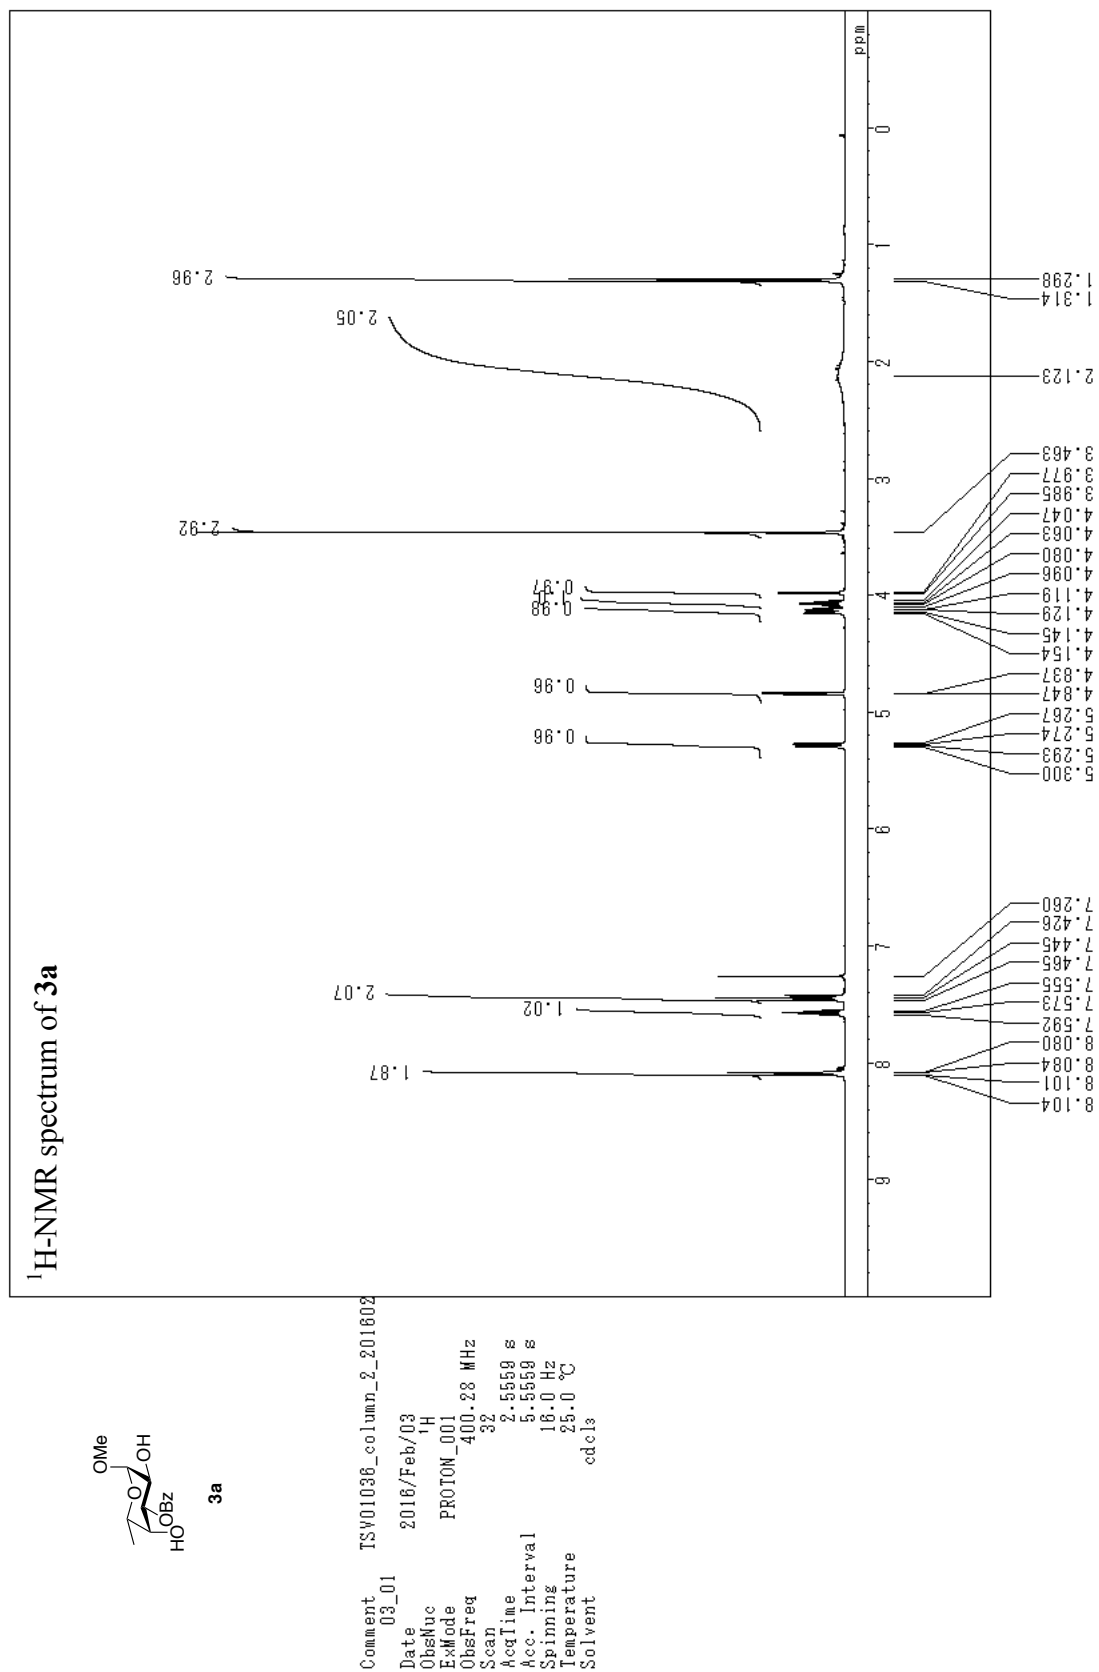

$^1\text{H}$ - $^1\text{H}$  COSY spectrum of **3a**

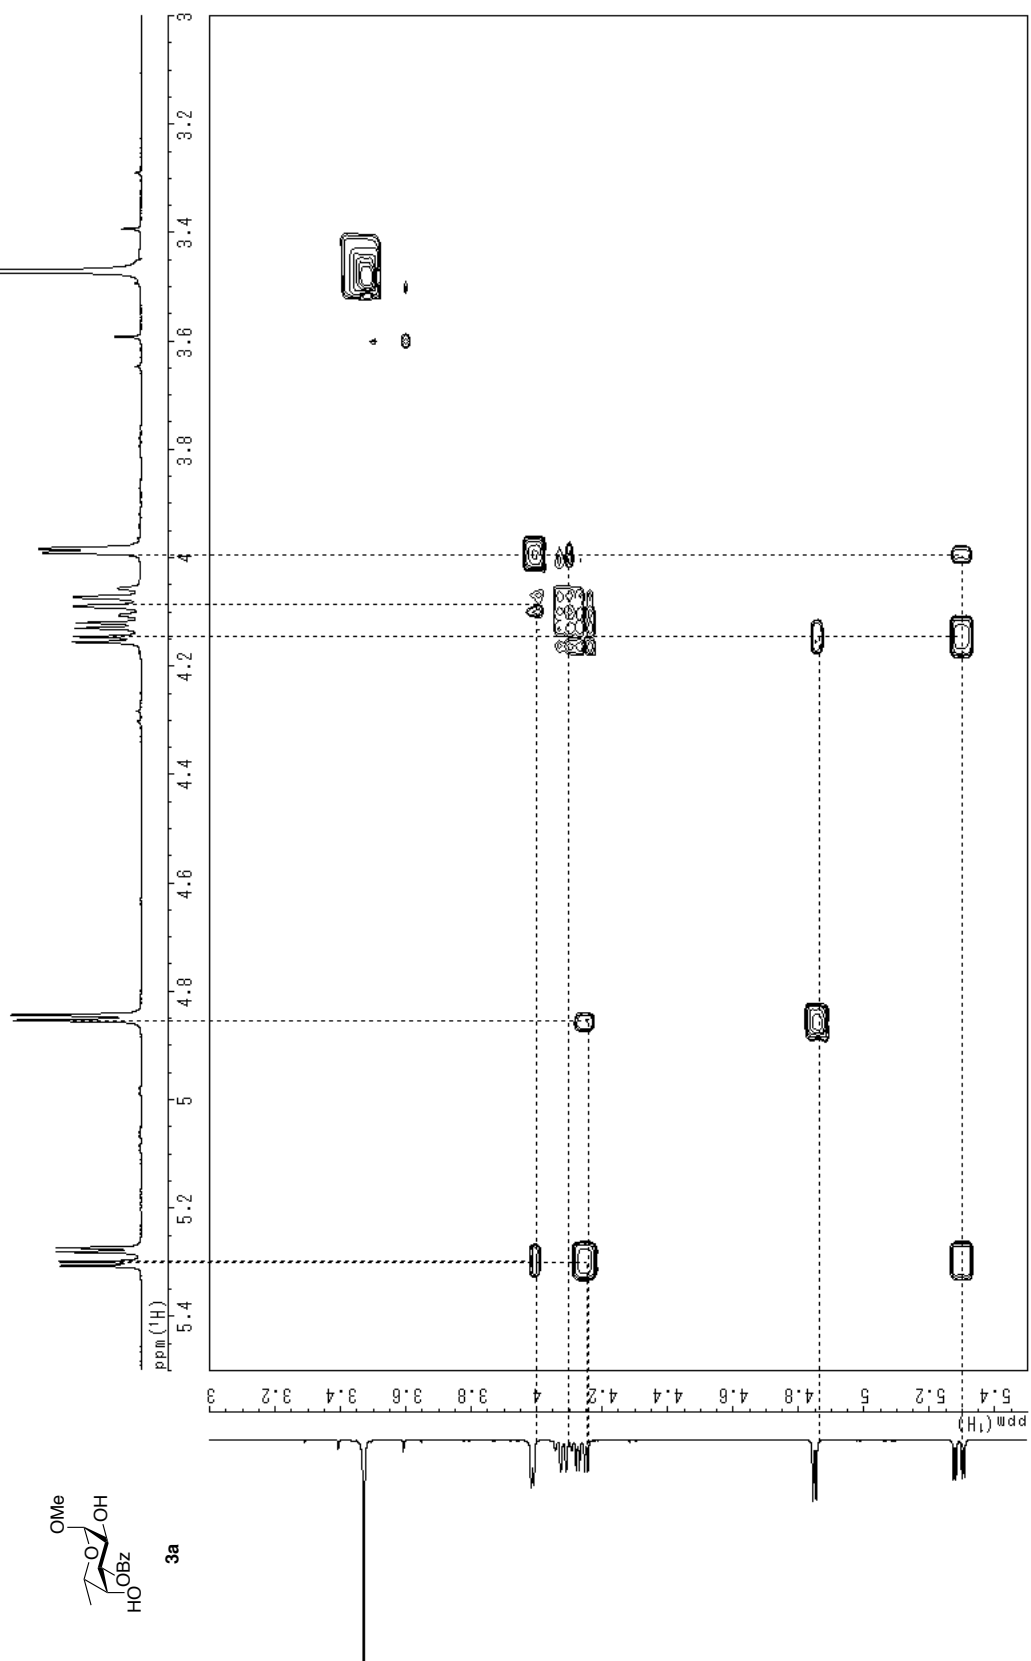

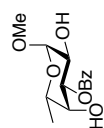

3a

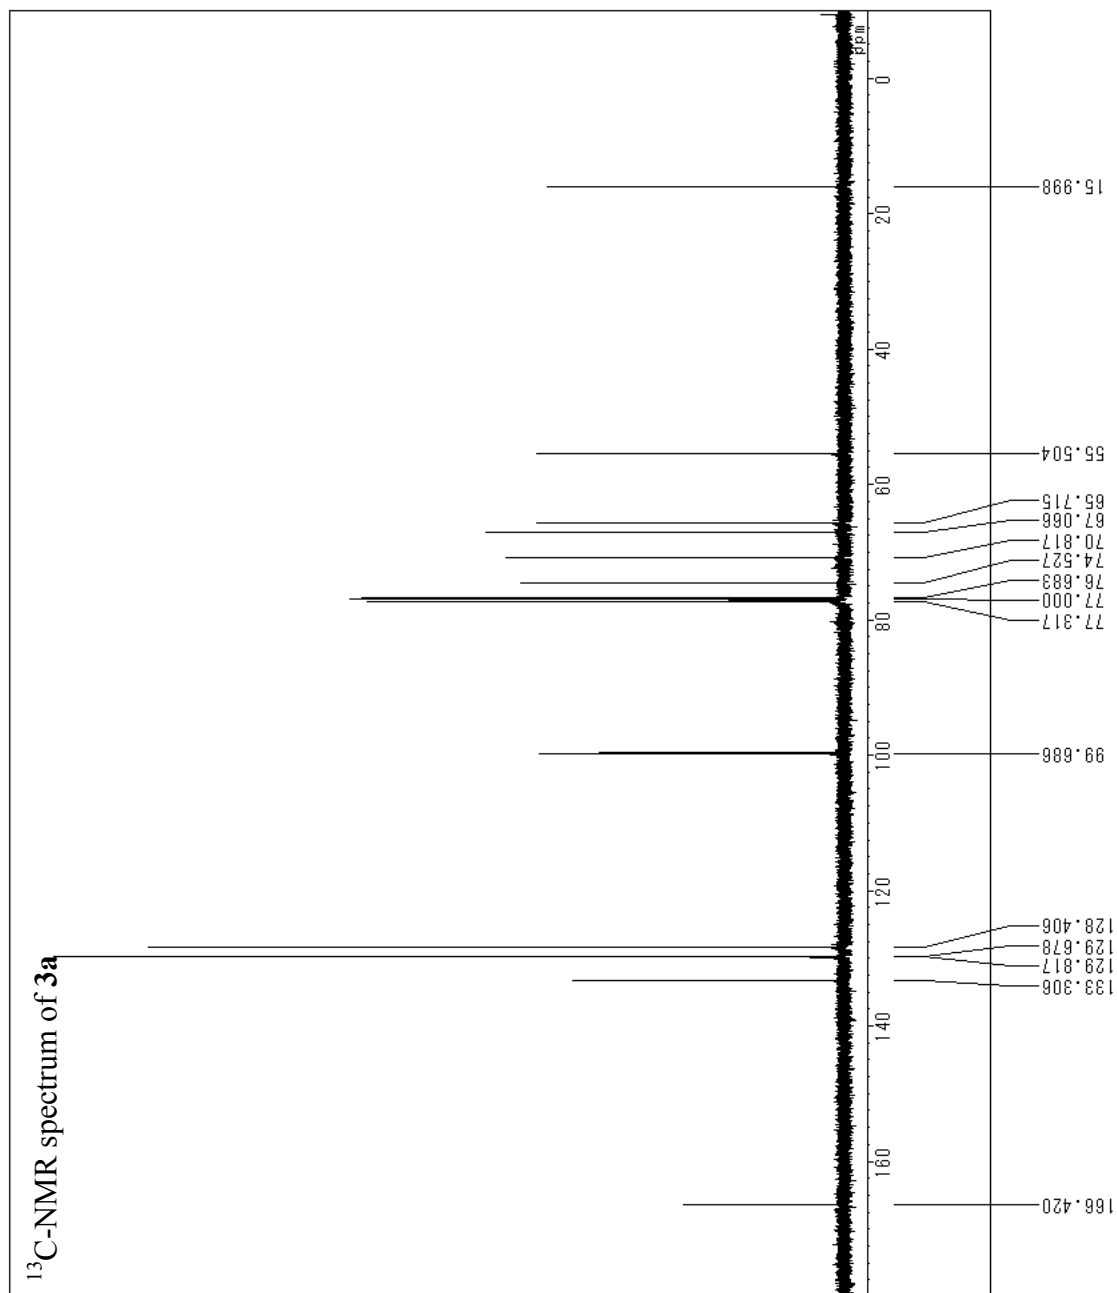

Comment TAO-14-11-19-38-C\_201512  
 30\_01  
 Date 2015/Dec/30  
 ObsNuc <sup>13</sup>C  
 ExMode CARBON\_001  
 ObsFreq 100.66 MHz  
 Scan 256  
 AcqTime 1.3831 s  
 Acc. Interval 3.3831 s  
 Spinning 20.0 Hz  
 Temperature 25.0 °C  
 Solvent cdcl<sub>3</sub>



Methyl 2-*O*-benzoyl- $\alpha$ -L-fucopyranoside (**4**)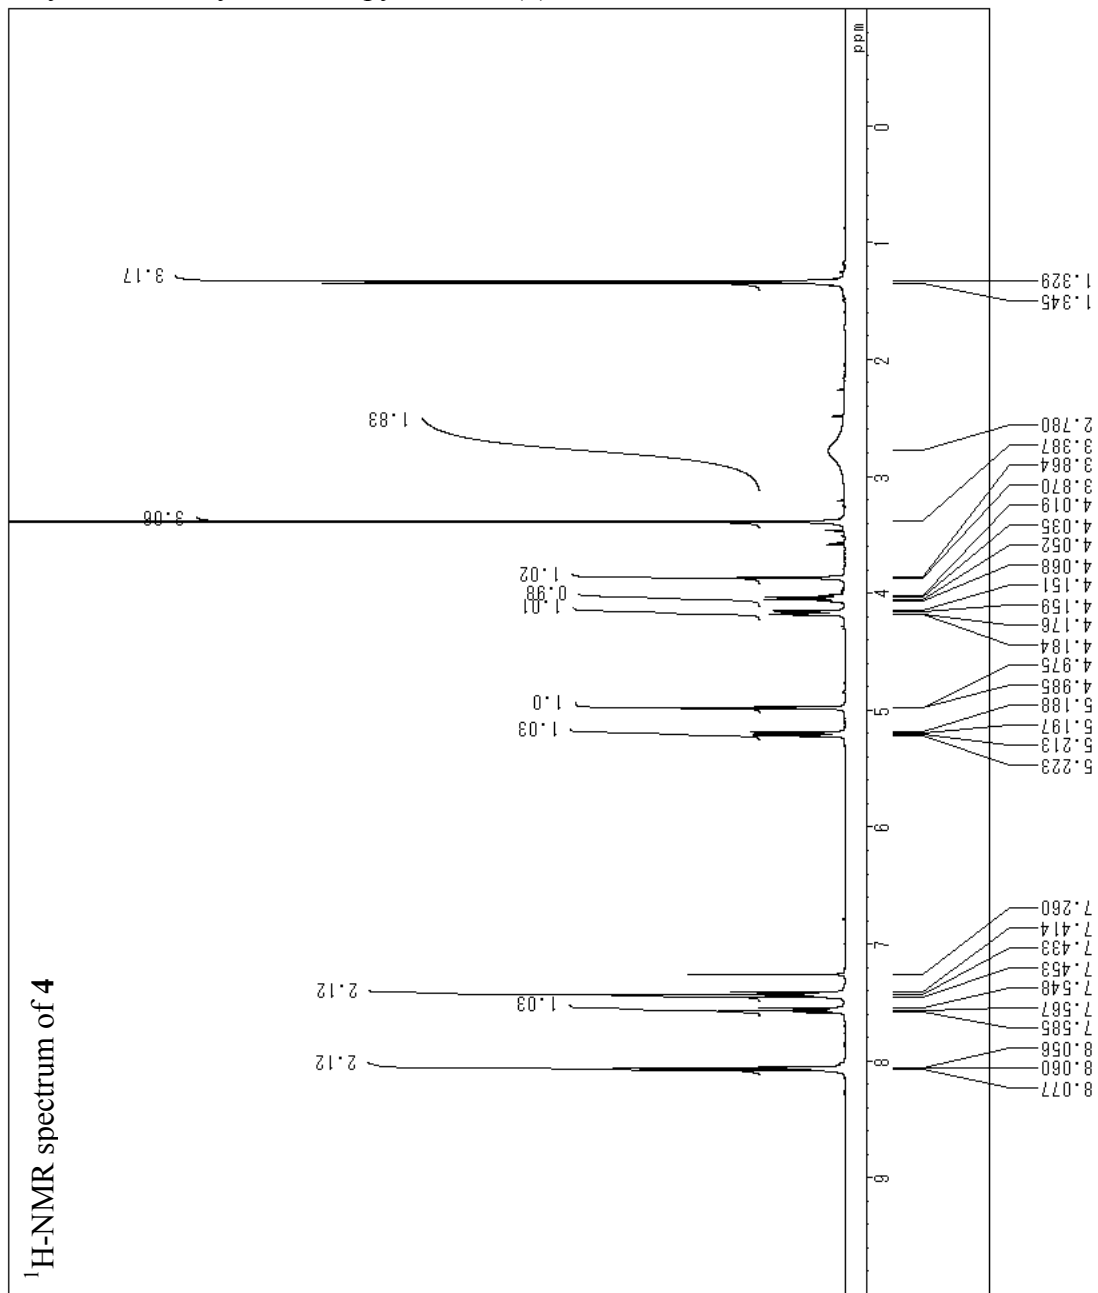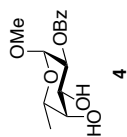

|               |                           |
|---------------|---------------------------|
| Comment       | TSY250228_13C-COSY_201901 |
| 18_01         |                           |
| Date          | 2019/Jan/18               |
| ObsNuc        | <sup>1</sup> H            |
| ExMode        | PROTON_001                |
| ObsFreq       | 400.27 MHz                |
| Scan          | 16                        |
| AcqTime       | 2.5559 s                  |
| Acc. Interval | 5.5559 s                  |
| Spinning      | 15.0 Hz                   |
| Temperature   | 25.0 °C                   |
| Solvent       | cdcl3                     |

$^1\text{H}$ - $^1\text{H}$  COSY spectrum of **4**

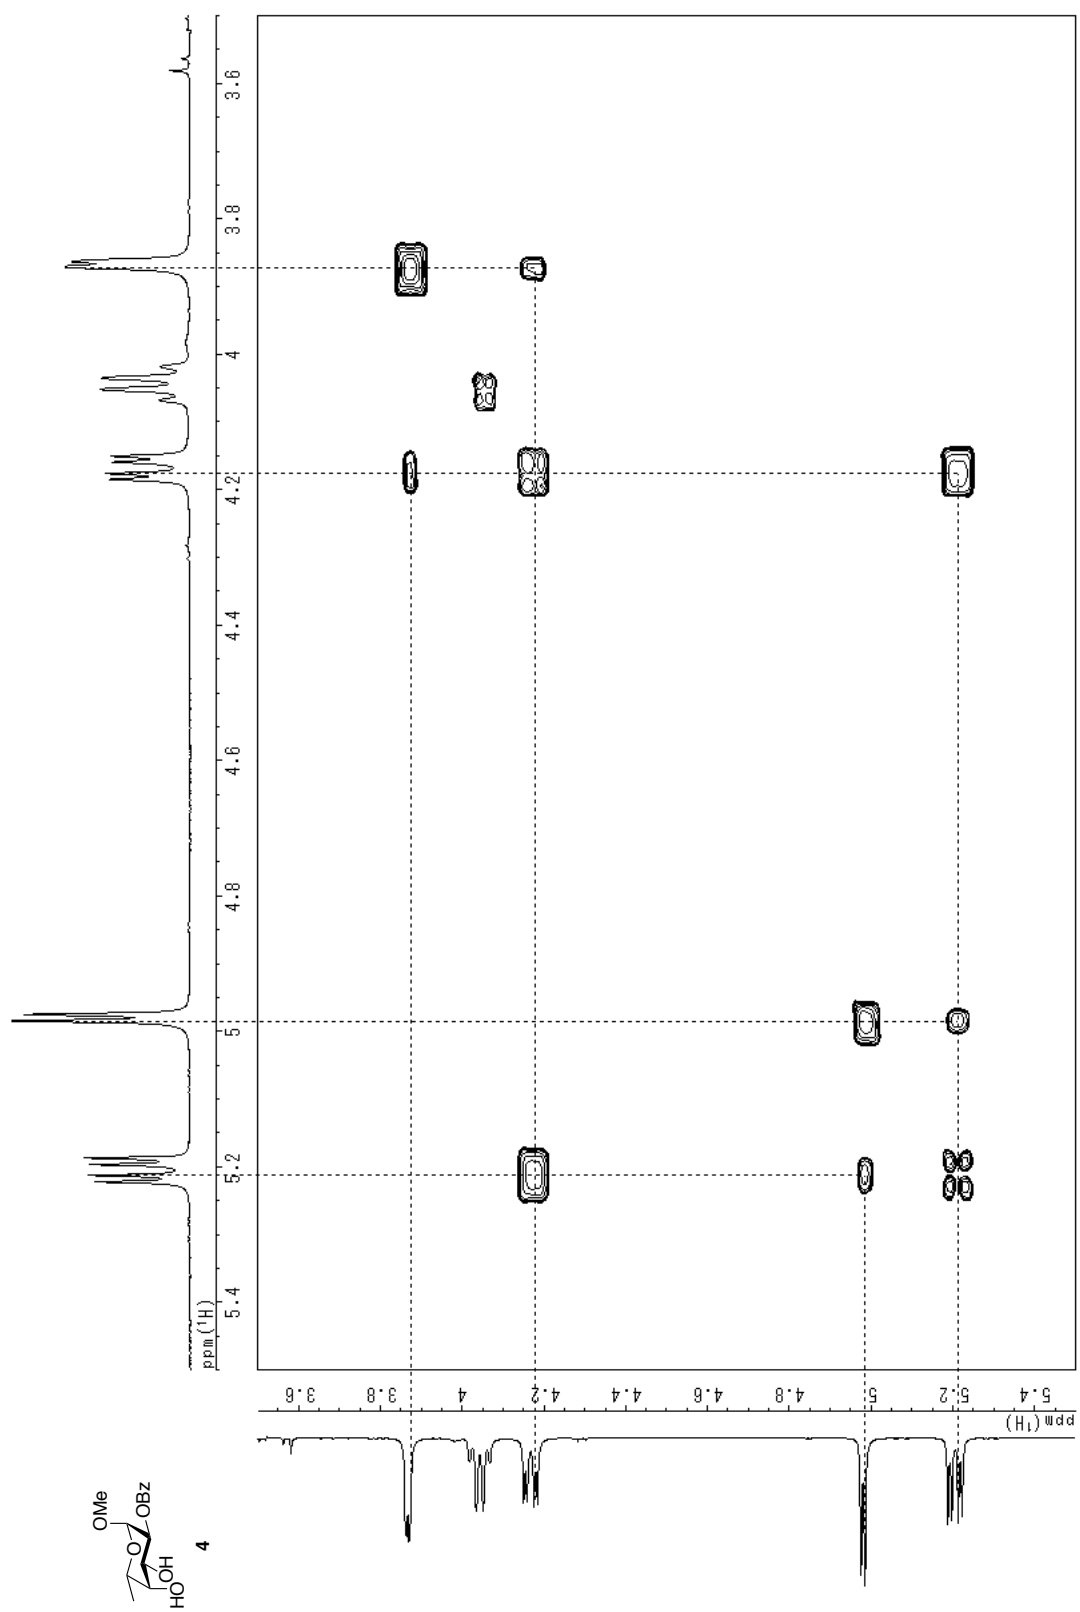

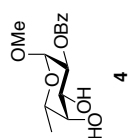

<sup>13</sup>C-NMR spectrum of 4

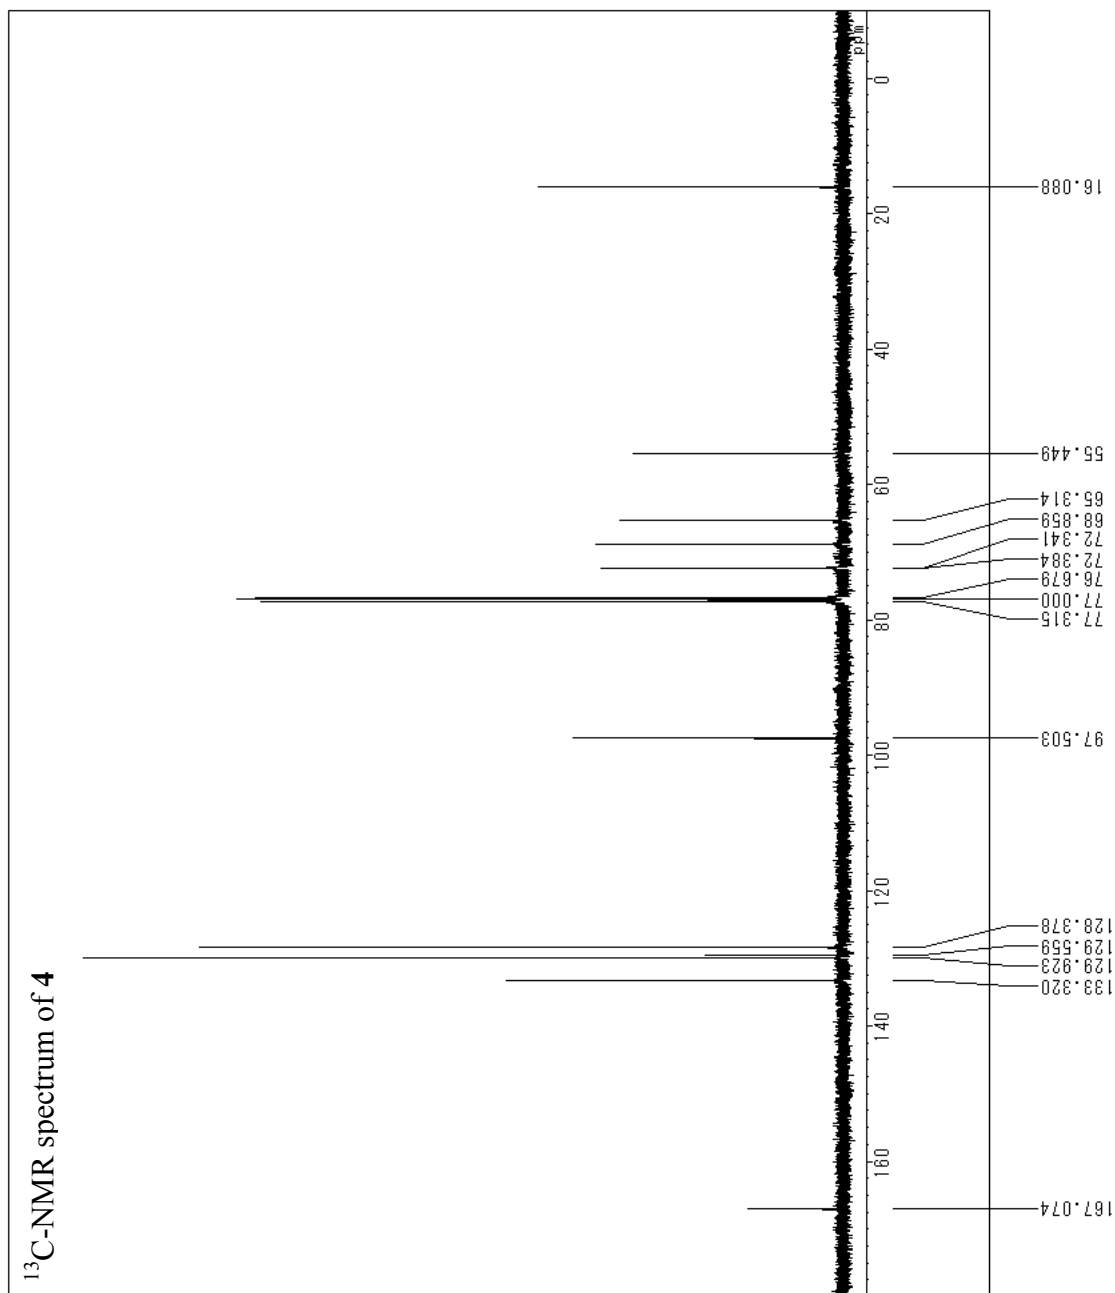

Comment TSV25028\_13C\_COSY\_20180118\_01  
 Date 2018/Jan/18  
 ObsNuc <sup>13</sup>C  
 ExMode CARBON\_001  
 ObsFreq 100.66 MHz  
 Scan 512  
 AcqTime 1.3831 s  
 Acc. Interval 3.3831 s  
 Spinning 20.0 Hz  
 Temperature 25.0 °C  
 Solvent cdcl<sub>3</sub>

Methyl 2,3-*O*-dibenzoyl- $\alpha$ -L-fucopyranoside (**5**)

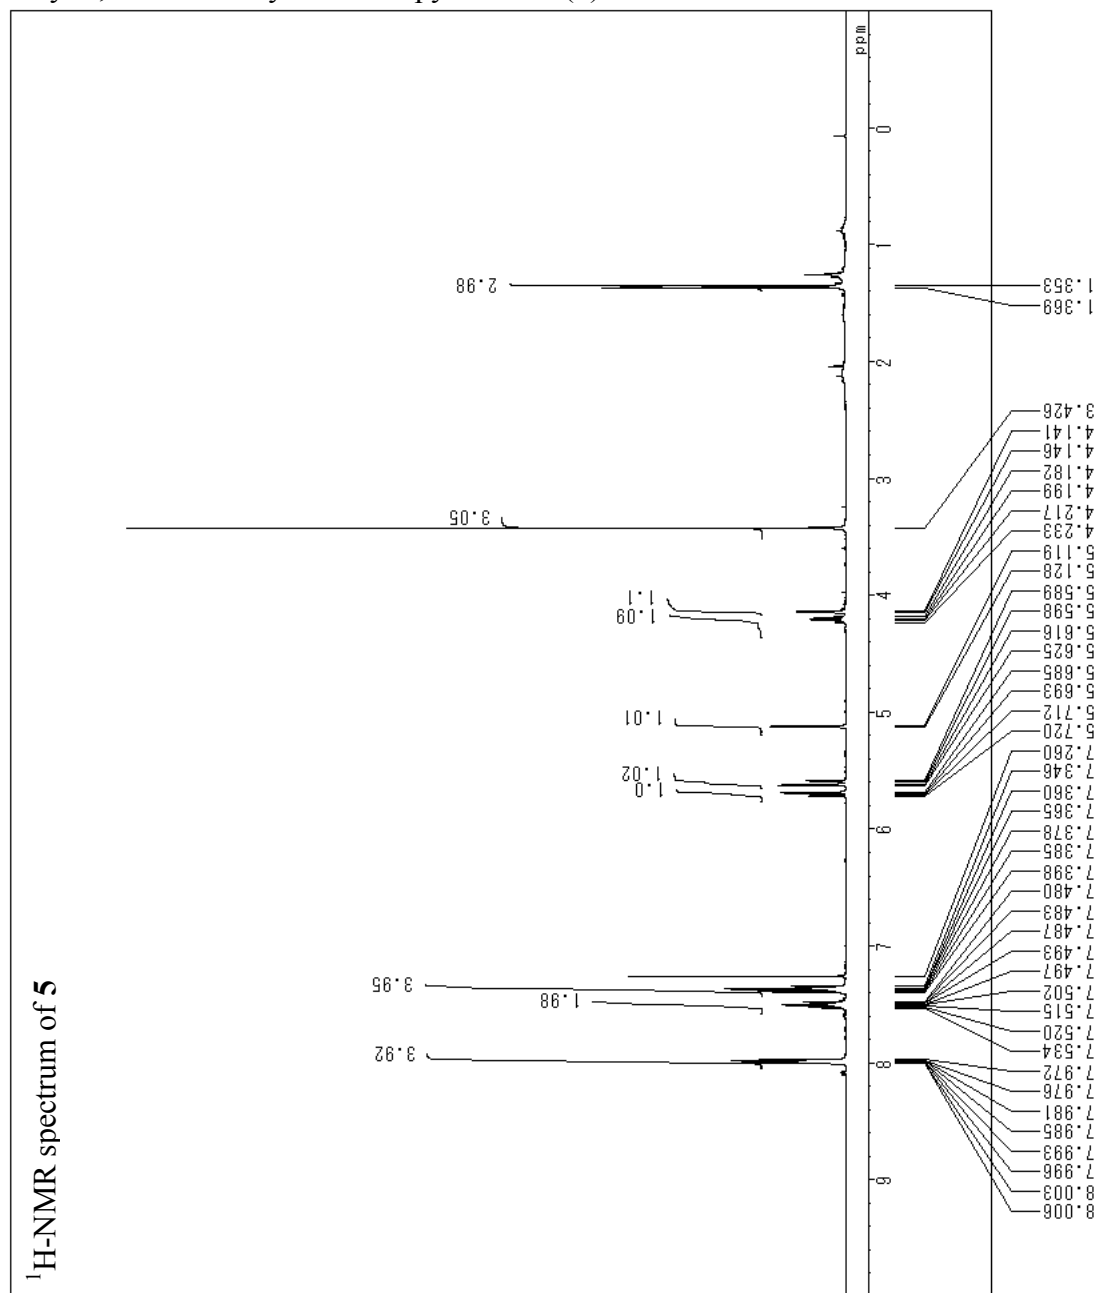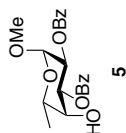

Comment: TSV25029\_pure\_13C\_COSY\_2  
 0190127\_01  
 Date: 2019/Jan/27  
 ObsNuc: <sup>1</sup>H  
 ExMode: PROTON\_001  
 ObsFreq: 399.45 MHz  
 Scan: 16  
 AcqTime: 2.589 s  
 Acc. Interval: 5.589 s  
 Spinning: 16.0 Hz  
 Temperature: 25.0 °C  
 Solvent: cdcl3

$^1\text{H}$ - $^1\text{H}$  COSY spectrum of **5**

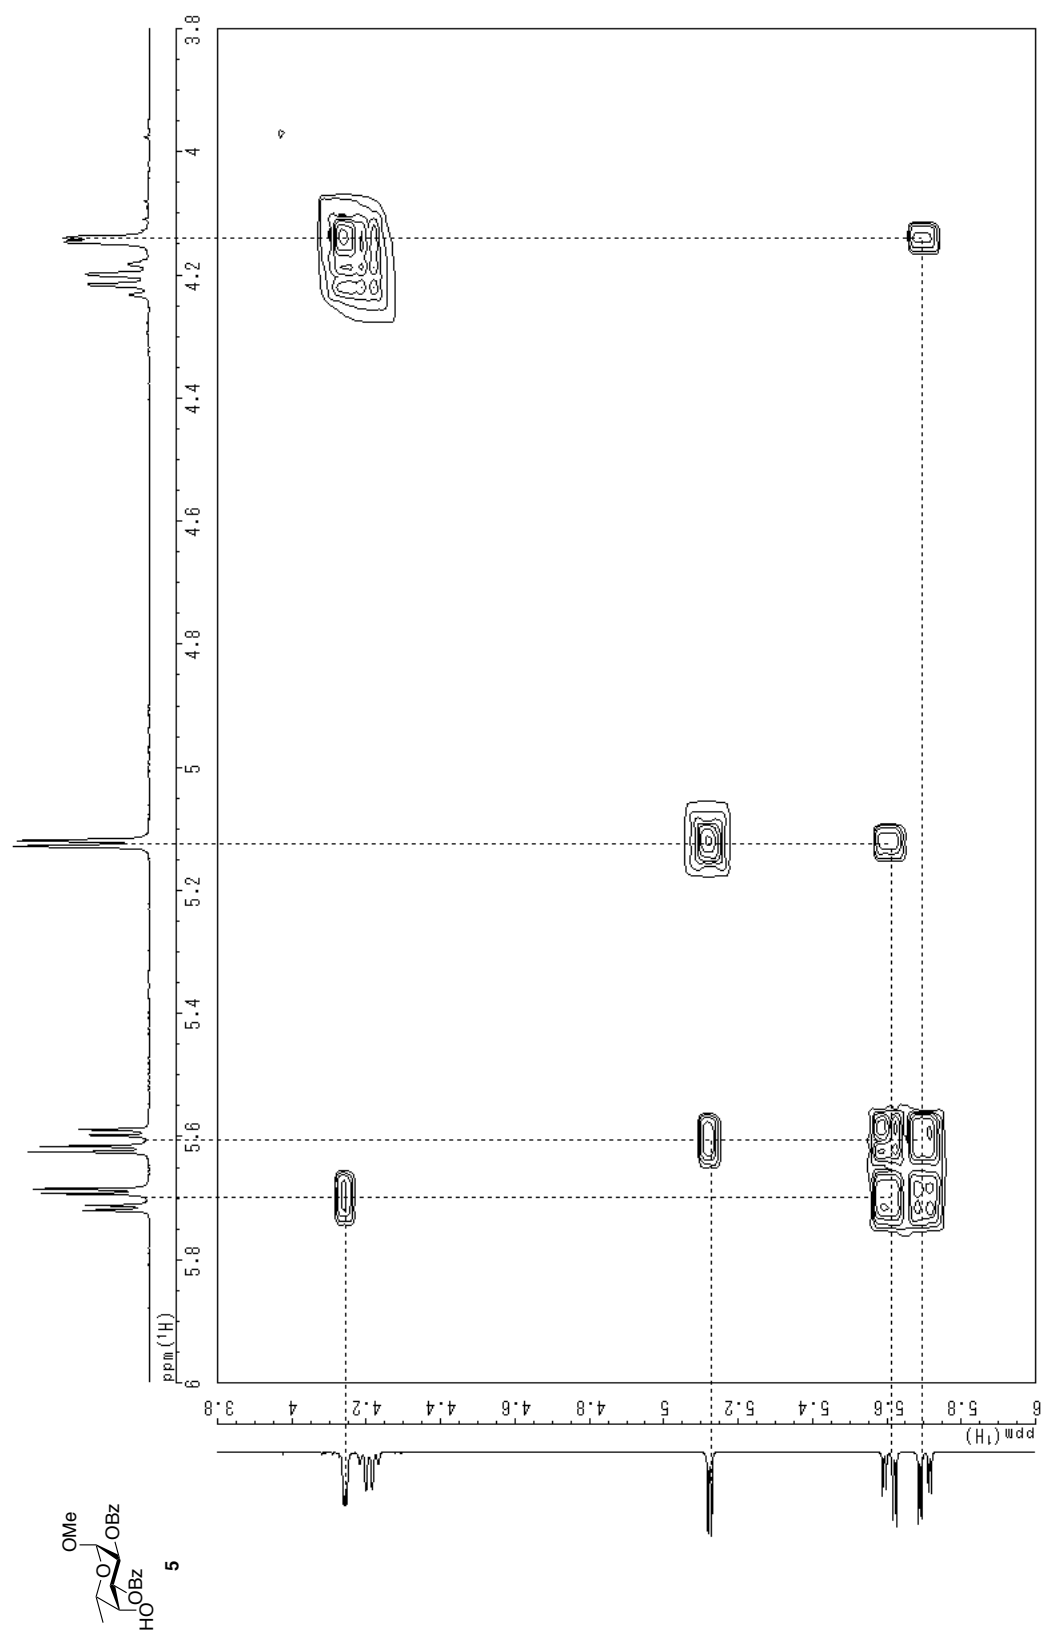

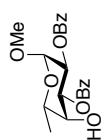

5

# <sup>13</sup>C-NMR spectrum of 5

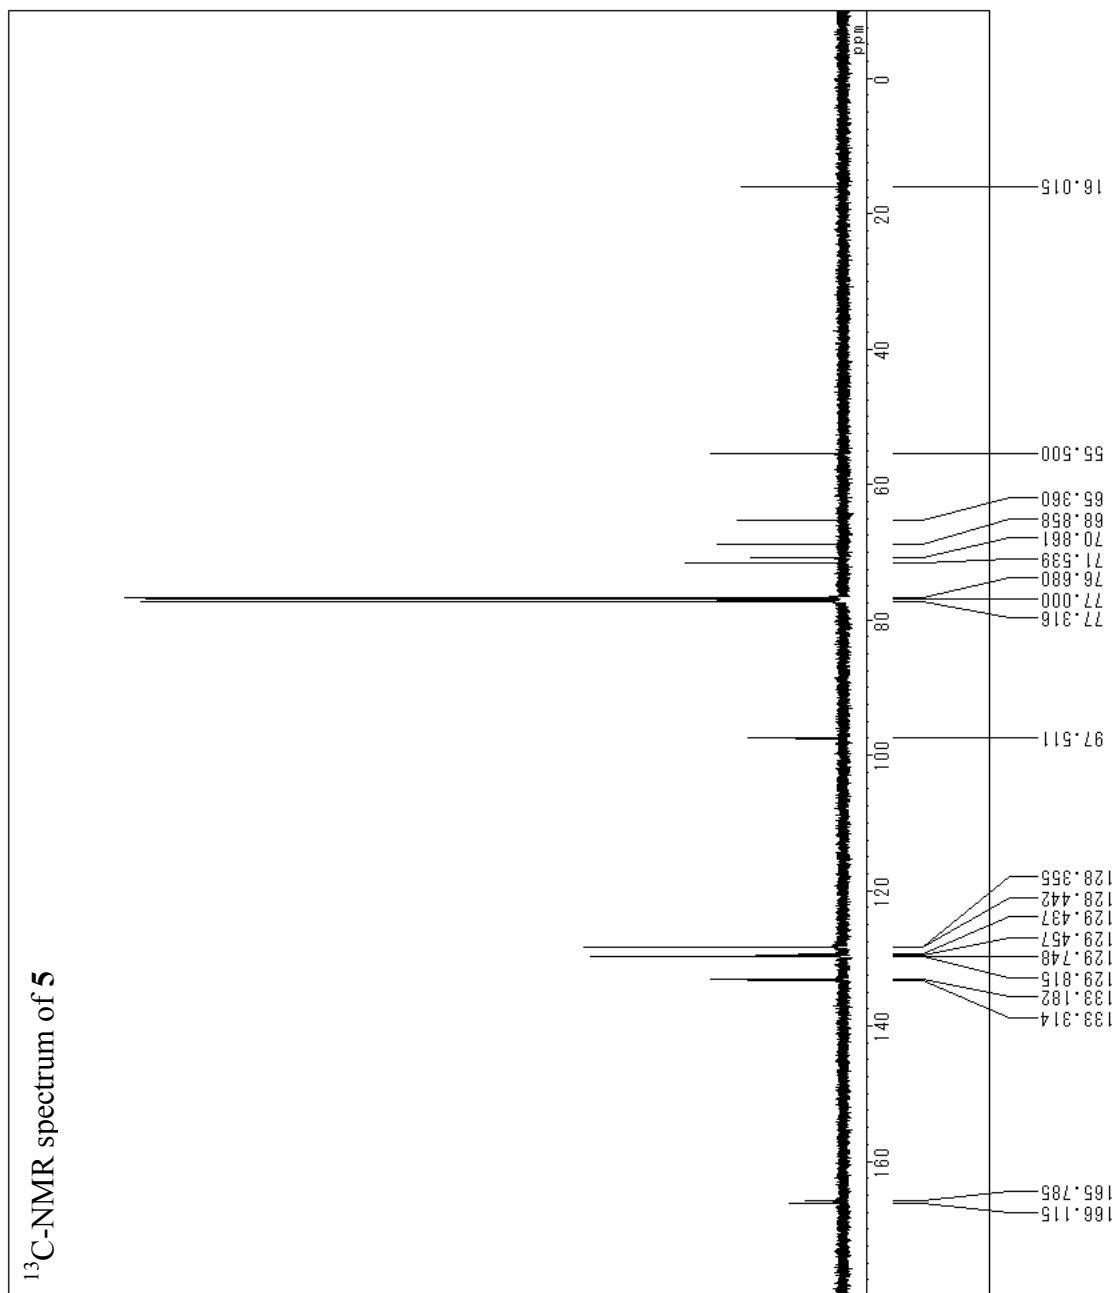

Comment TSV25029\_pure\_13C\_COSY\_2  
0190127\_01  
Date 2019/Jan/27  
ObsNuc <sup>13</sup>C  
ExMode CARBON\_001  
ObsFreq 100.45 MHz  
Scan 1024  
AcqTime 1.3831 s  
Acc. Interval 3.3831 s  
Spinning 20.0 Hz  
Temperature 25.0 °C  
Solvent cdcl<sub>3</sub>

Methyl 2,3,4-*O*-tribenzoyl- $\alpha$ -L-fucopyranoside (**6**)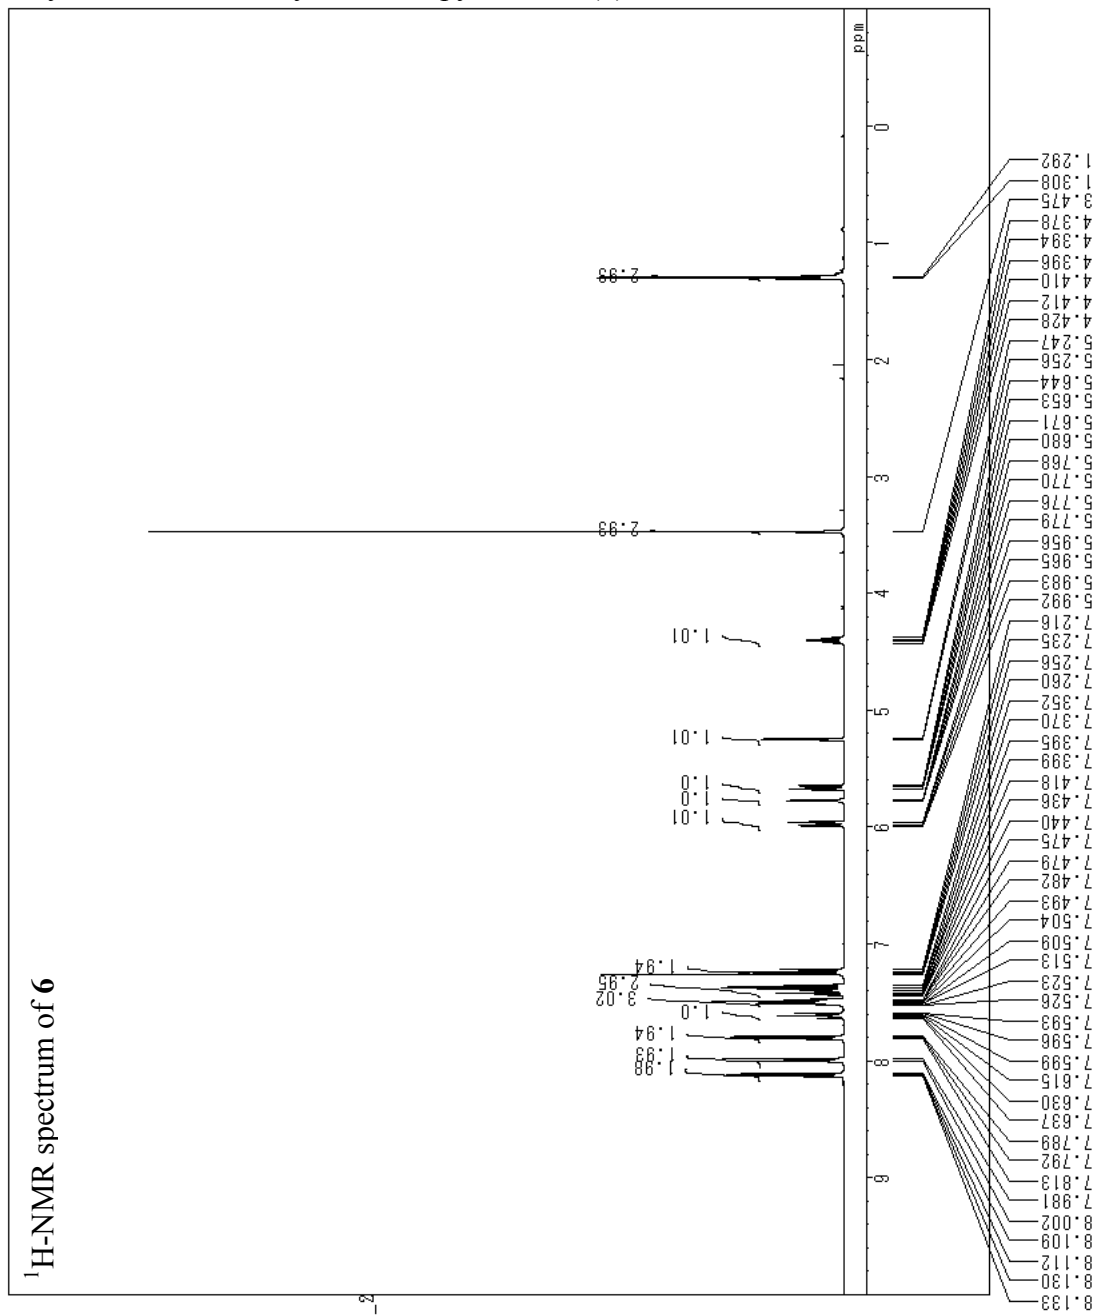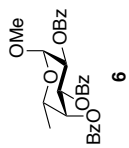

|               |                          |
|---------------|--------------------------|
| Comment       | TS/25034_pure_13C_COSY_2 |
| Date          | 0180129_01               |
| ObsNuc        | 1H                       |
| ExMode        | PROTON_001               |
| ObsFreq       | 399.45 MHz               |
| Scan          | 16                       |
| AcqTime       | 2.568 s                  |
| Acc. Interval | 5.569 s                  |
| Spinning      | 16.0 Hz                  |
| Temperature   | 25.0 °C                  |
| Solvent       | cdcl3                    |

$^1\text{H}$ - $^1\text{H}$  COSY spectrum of **6**

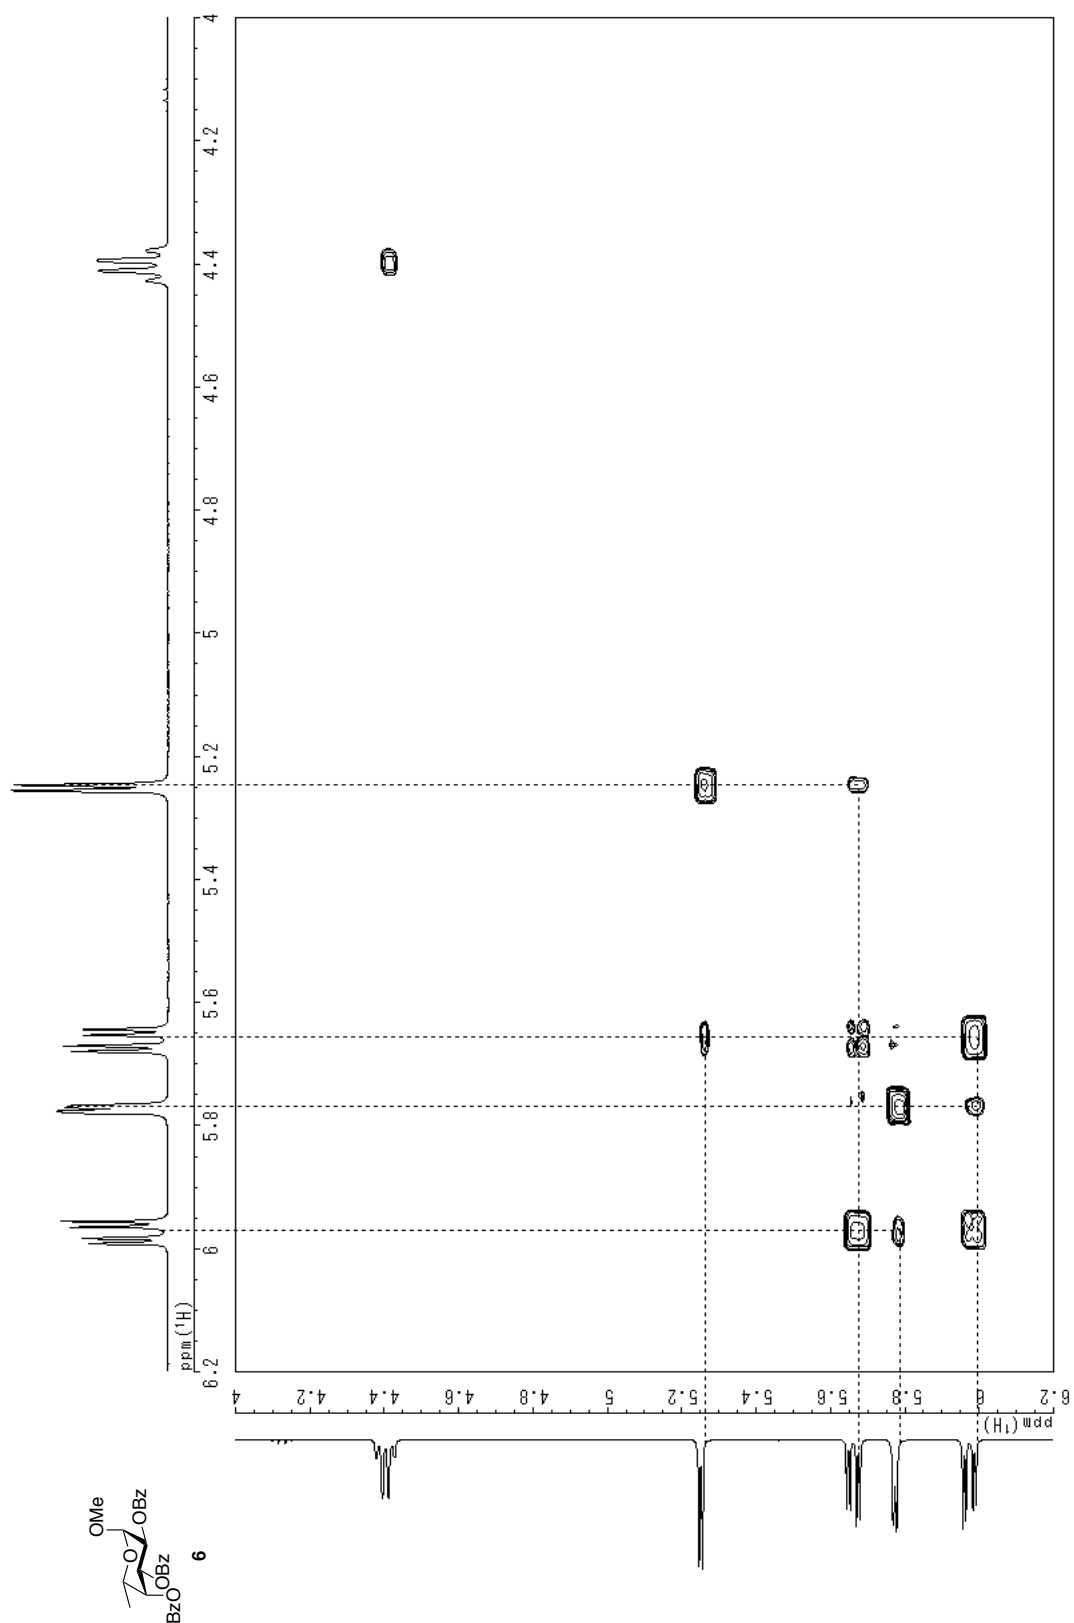



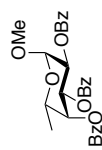

<sup>13</sup>C-NMR spectrum of 6

Comment TSV25034\_pure\_13C\_COSY\_2  
 0190129\_01  
 Date 2019/Jan/29  
 ObsNuc <sup>13</sup>C  
 ExMode CARBON\_001  
 ObsFreq 100.45 MHz  
 Scan 512  
 AcqTime 1.3831 s  
 Acc. Interval 3.3831 s  
 Spinning 20.0 Hz  
 Temperature 25.0 °C  
 Solvent cdcl<sub>3</sub>

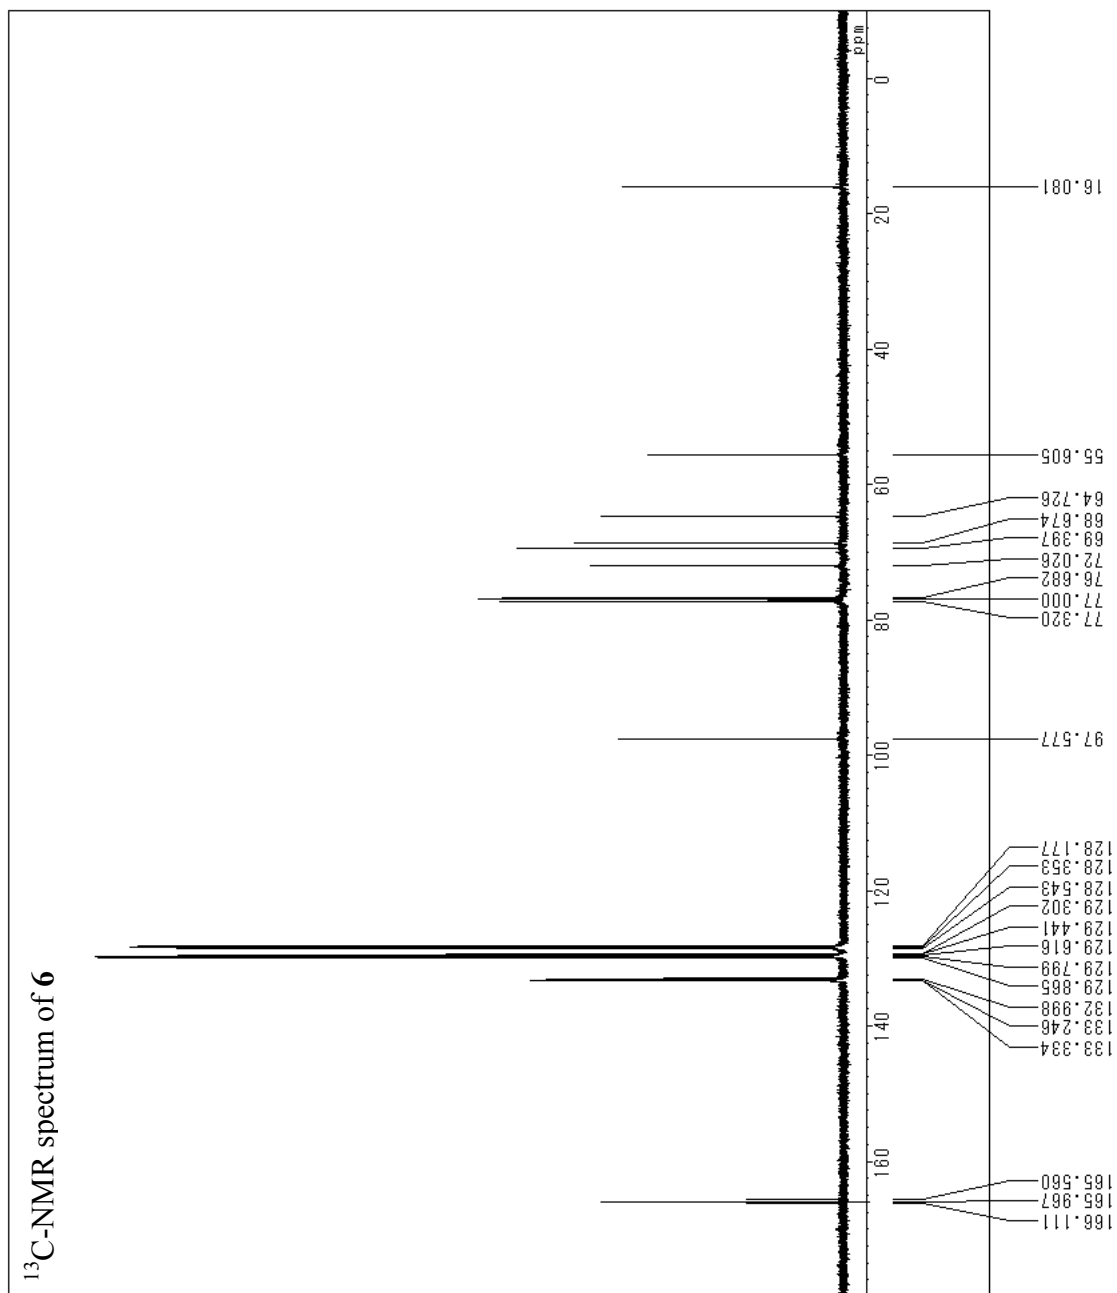

Methyl 6-((*tert*-butyldimethylsilyl)oxy)-3-*O*-benzoyl- $\alpha$ -D-galactopyranoside (**3b**)

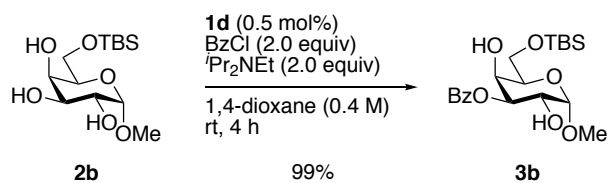

$^1\text{H}$ -NMR spectrum (crude reaction mixture in the presence of catalyst **1d**)

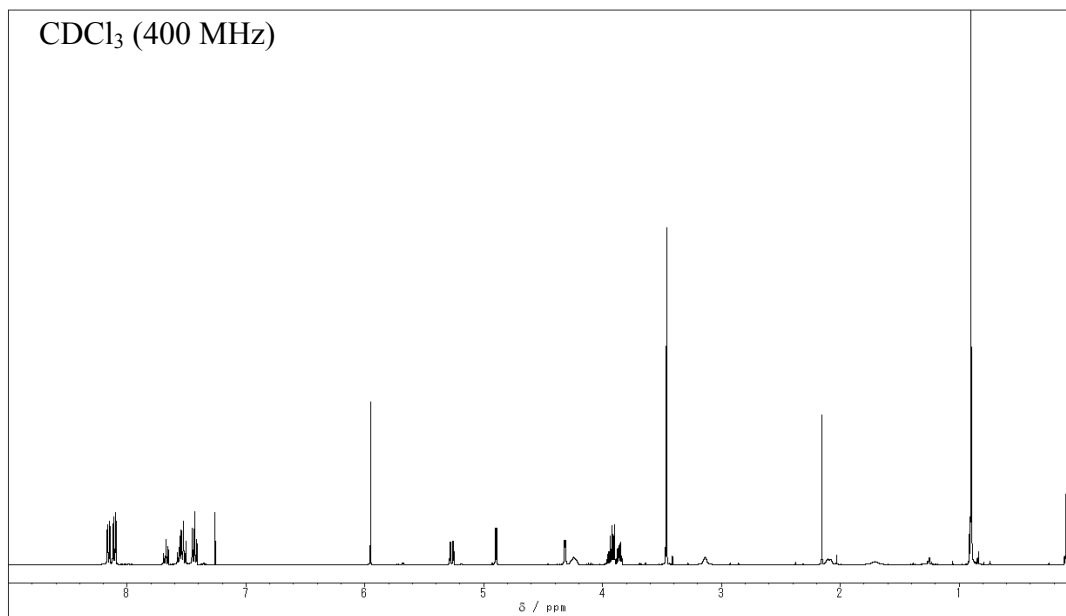

$^1\text{H}$ -NMR spectrum (crude reaction mixture in the absence of catalyst **1d**)

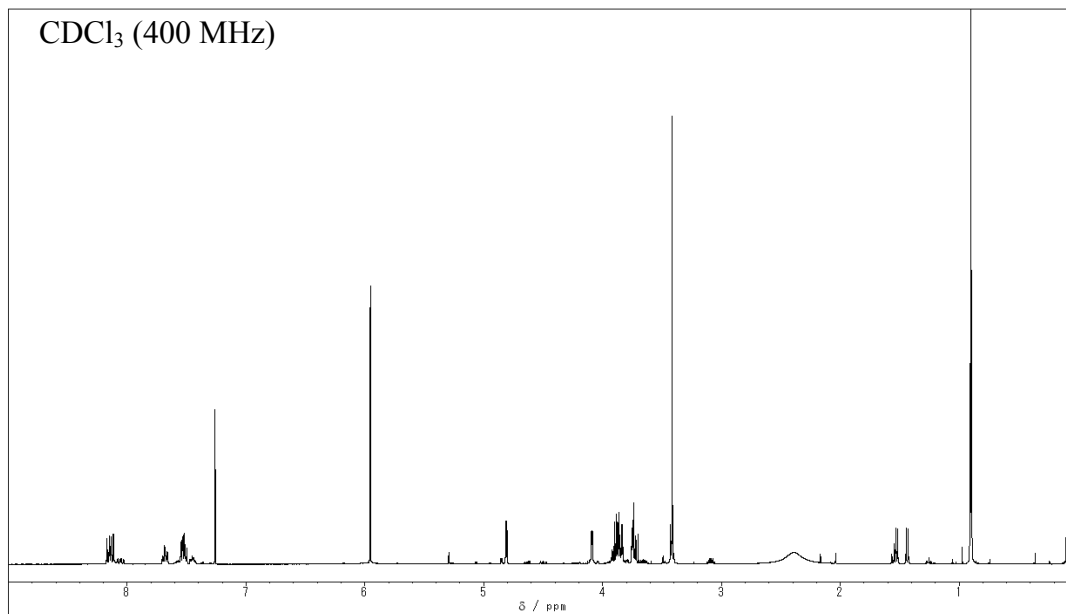

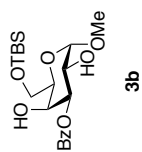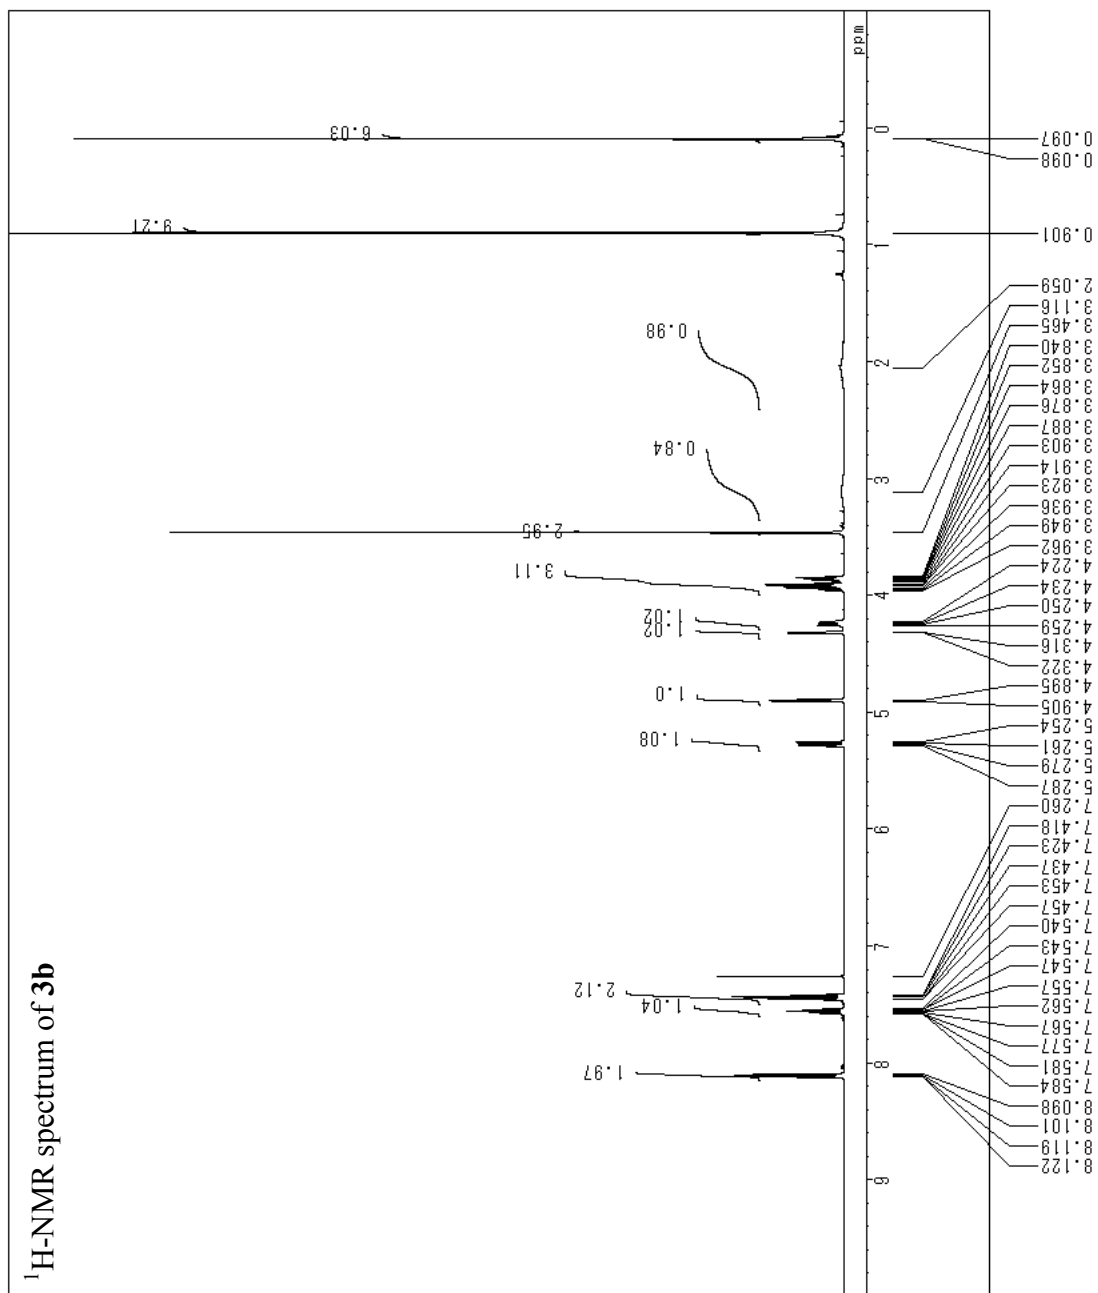

Comment TSV04037\_column\_20180208  
 Date\_01 2016/Feb/08  
 ObsNuc <sup>1</sup>H  
 ExMode PROTON\_001  
 ObsFreq 399.45 MHz  
 Scan 32  
 AcqTime 2.589 s  
 Acc. Interval 5.589 s  
 Spinning 16.0 Hz  
 Temperature 25.0 °C  
 Solvent cdcl<sub>3</sub>

$^1\text{H}$ - $^1\text{H}$  COSY spectrum of **3b**

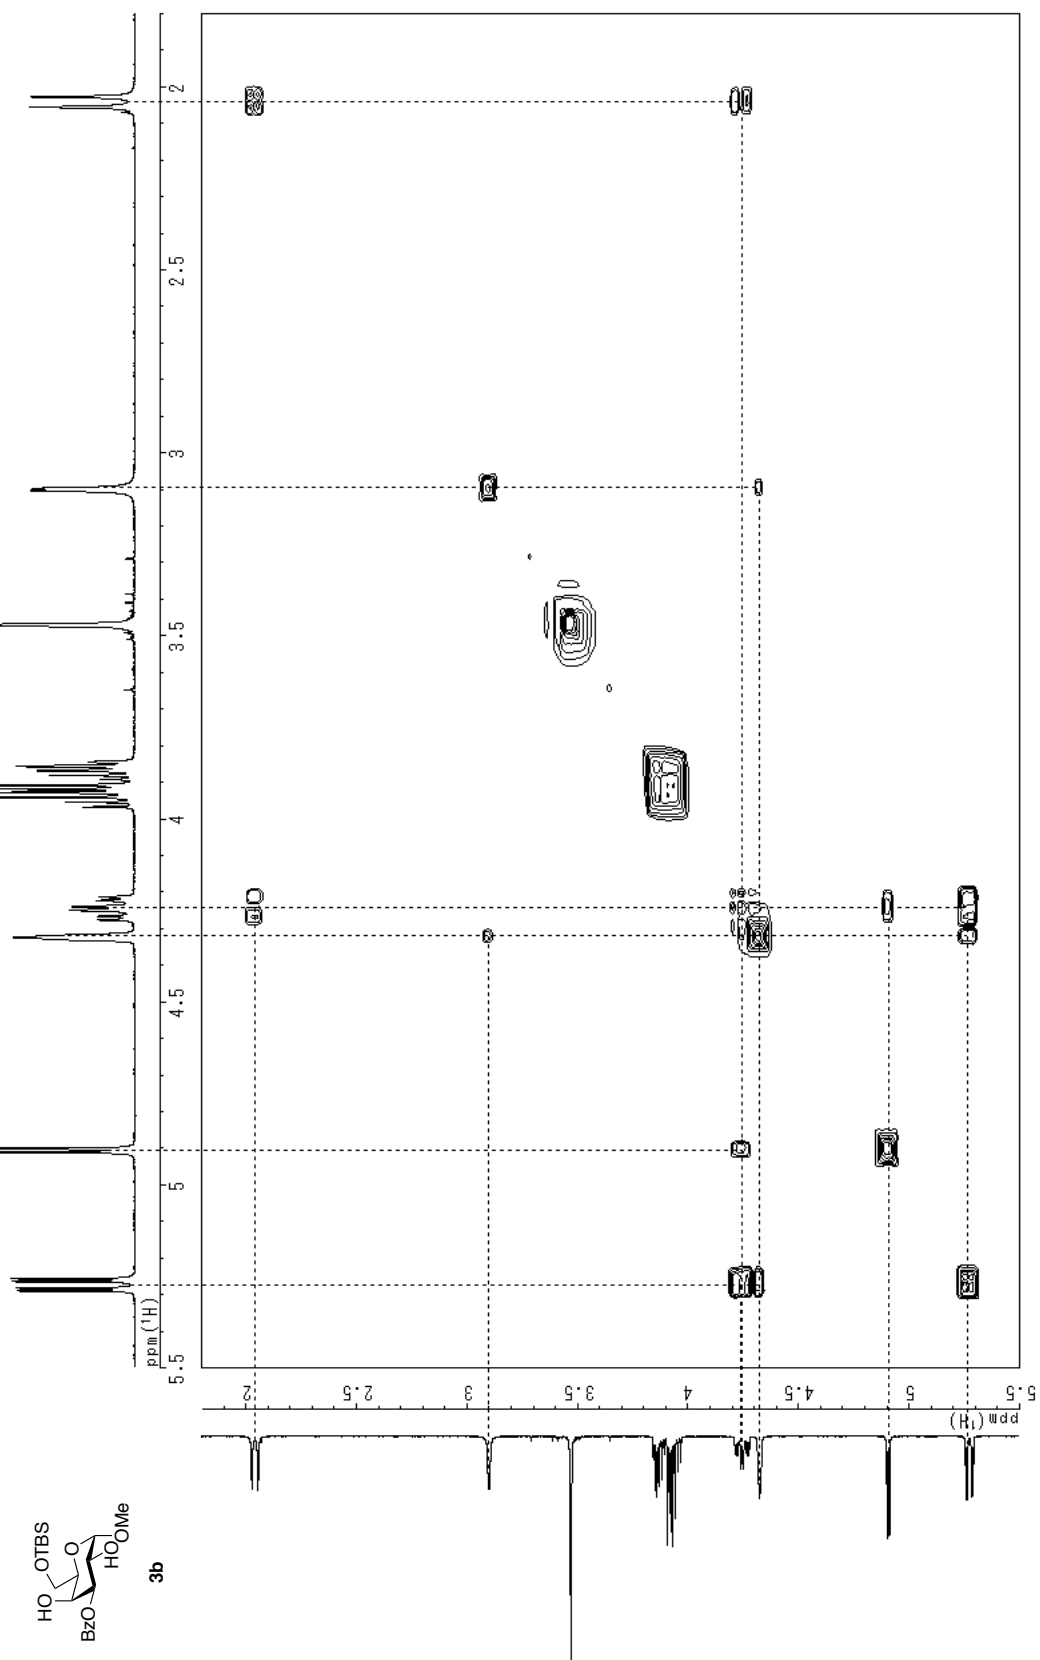

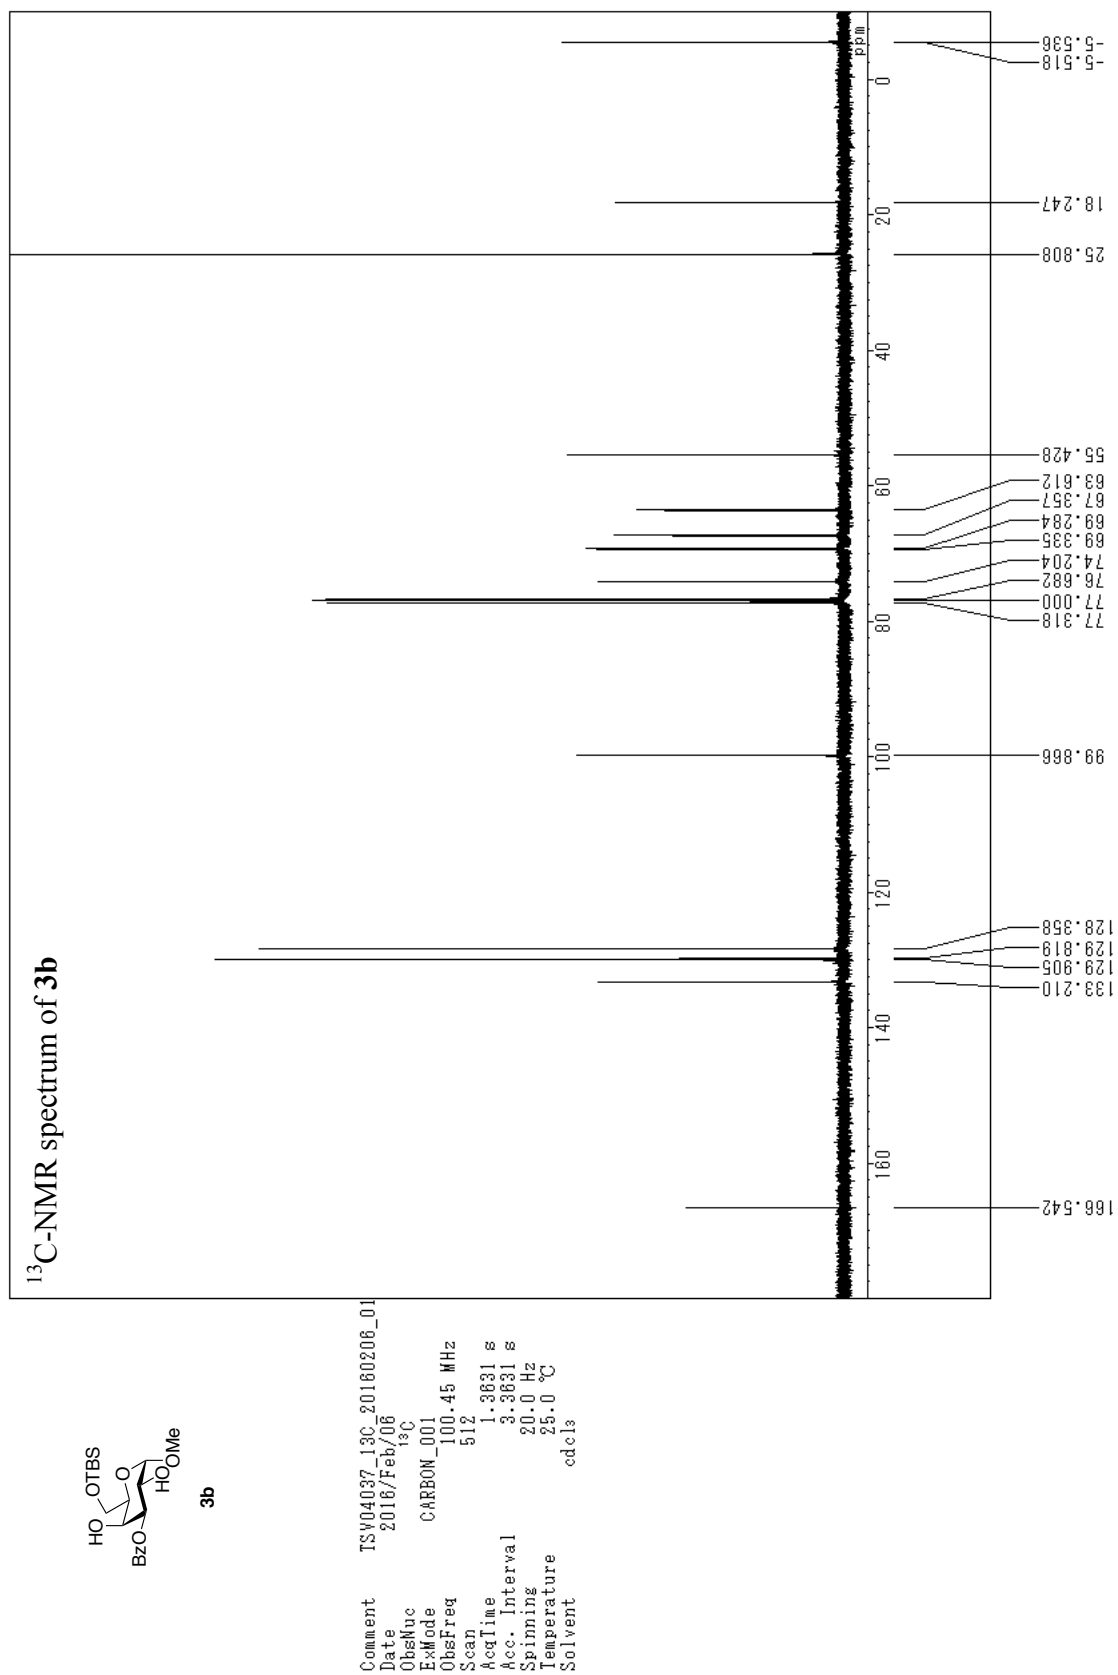

Allyl 6-((*tert*-butyldimethylsilyl)oxy)-3-*O*-benzoyl- $\alpha$ -D-galactopyranoside (**3c**)

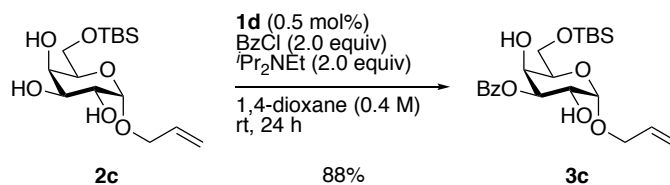

$^1\text{H}$ -NMR spectrum (crude reaction mixture in the presence of catalyst **1d**)

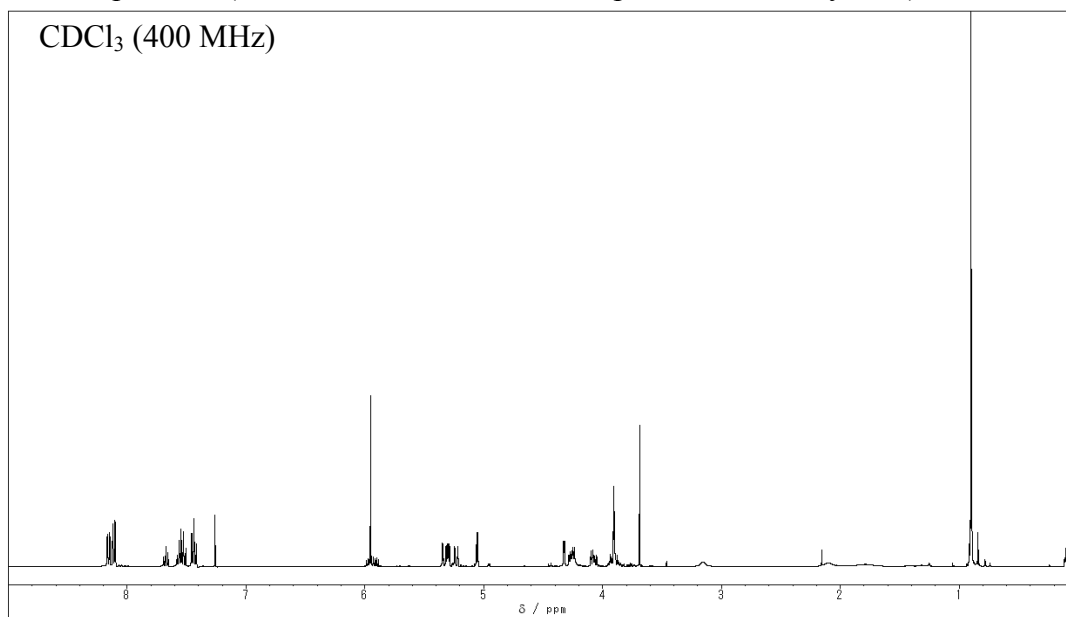

$^1\text{H}$ -NMR spectrum (crude reaction mixture in the absence of catalyst **1d**)

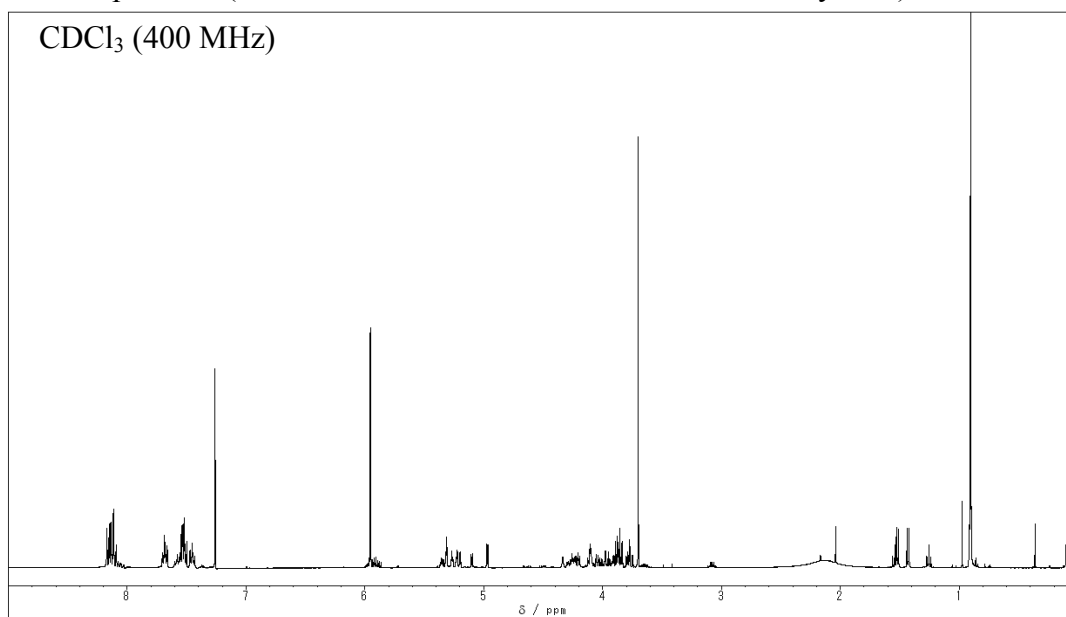

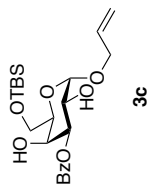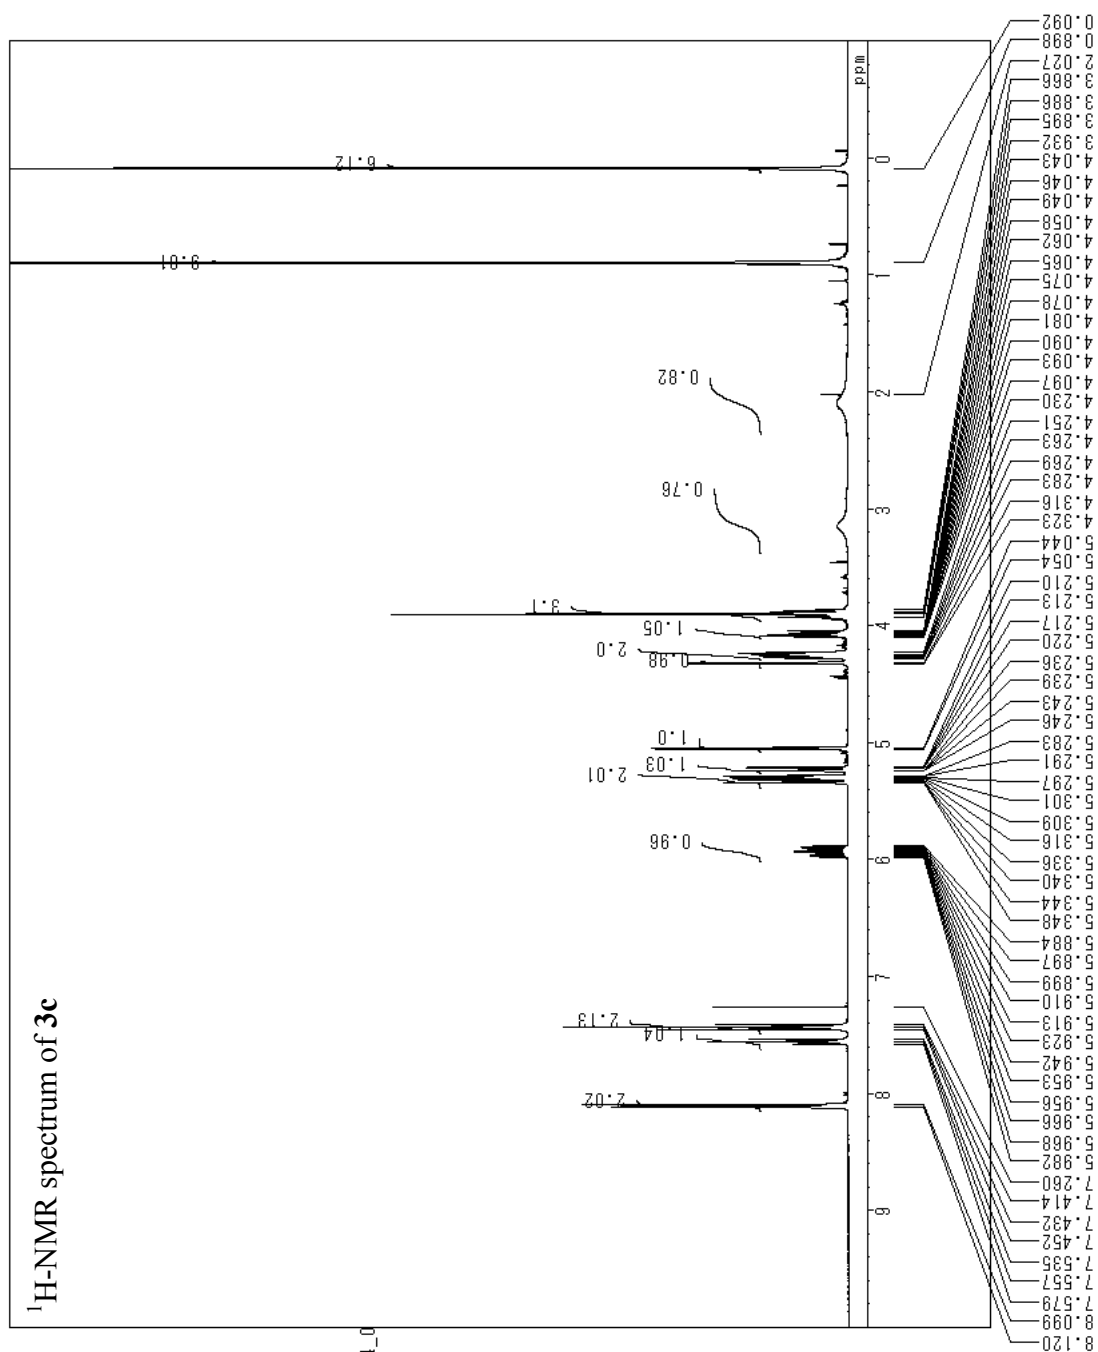

Comment TSV03026\_COSY\_20160714\_0  
 Date 2016/Jul/14  
 ObsNuc <sup>1</sup>H  
 ExMode PROTON\_001  
 ObsFreq 399.45 MHz  
 Scan 16  
 AcqTime 2.569 s  
 Acc. Interval 5.589 s  
 Spinning 16.0 Hz  
 Temperature 25.0 °C  
 Solvent cdcl<sub>3</sub>

$^1\text{H}$ - $^1\text{H}$  COSY spectrum of **3c**

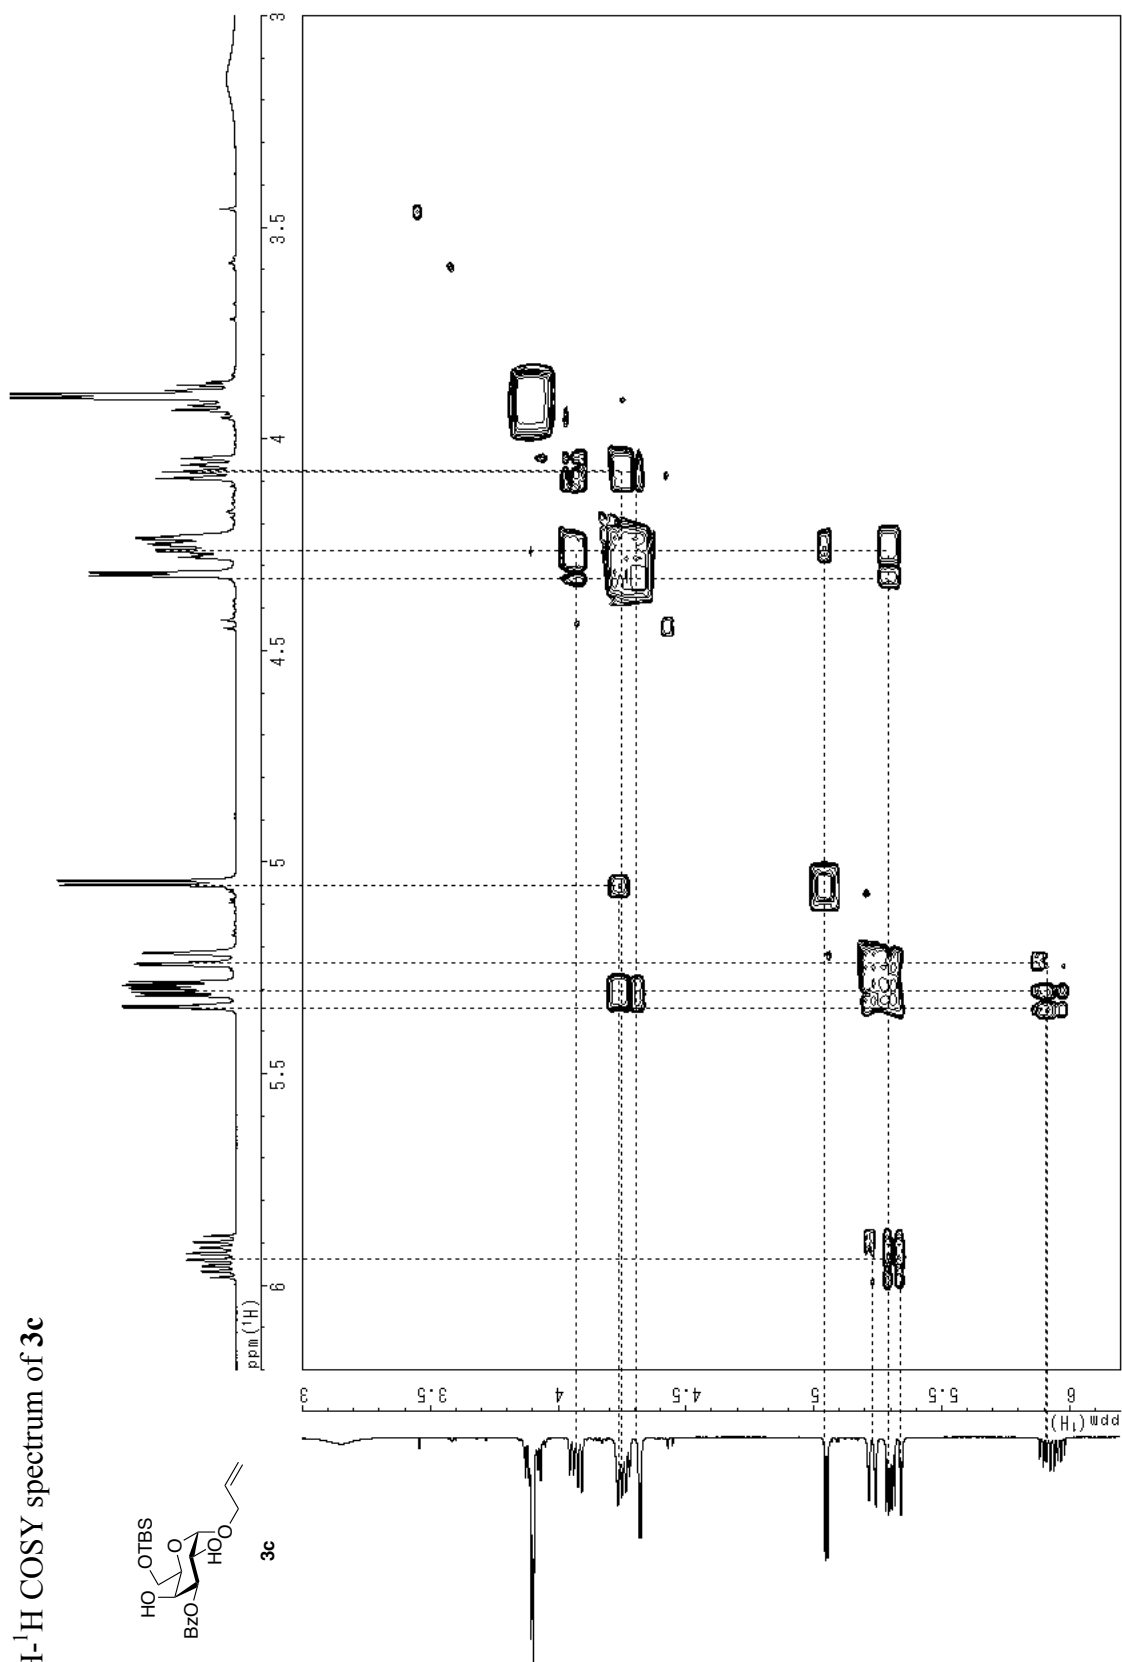



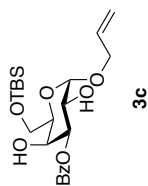

$^{13}\text{C}$ -NMR spectrum of **3c**

Comment TSV08026\_13C\_20160714\_01  
 Date 2016/Jul/14  
 ObsNuc  $^{13}\text{C}$   
 ExMode CARBON\_001  
 ObsFreq 100.45 MHz  
 Scan 512  
 AcqTime 1.3631 s  
 Acc. Interval 3.3631 s  
 Spinning 20.0 Hz  
 Temperature 25.0  $^{\circ}\text{C}$   
 Solvent  $\text{cdCl}_3$

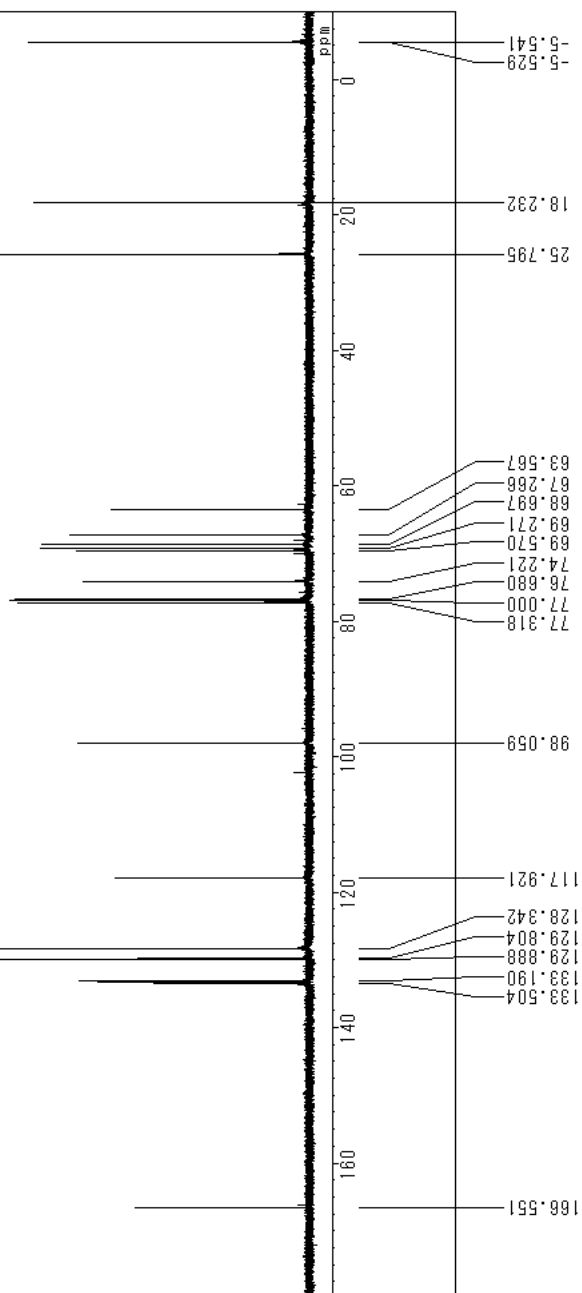

Allyl 6-((*tert*-butyldimethylsilyl)oxy)-3-*O*-benzoyl- $\beta$ -D-galactopyranoside (**3d**)

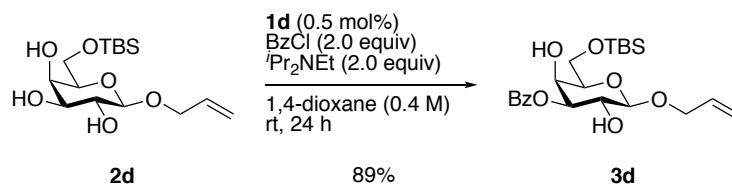

$^1\text{H}$ -NMR spectrum (crude reaction mixture in the presence of catalyst **1d**)

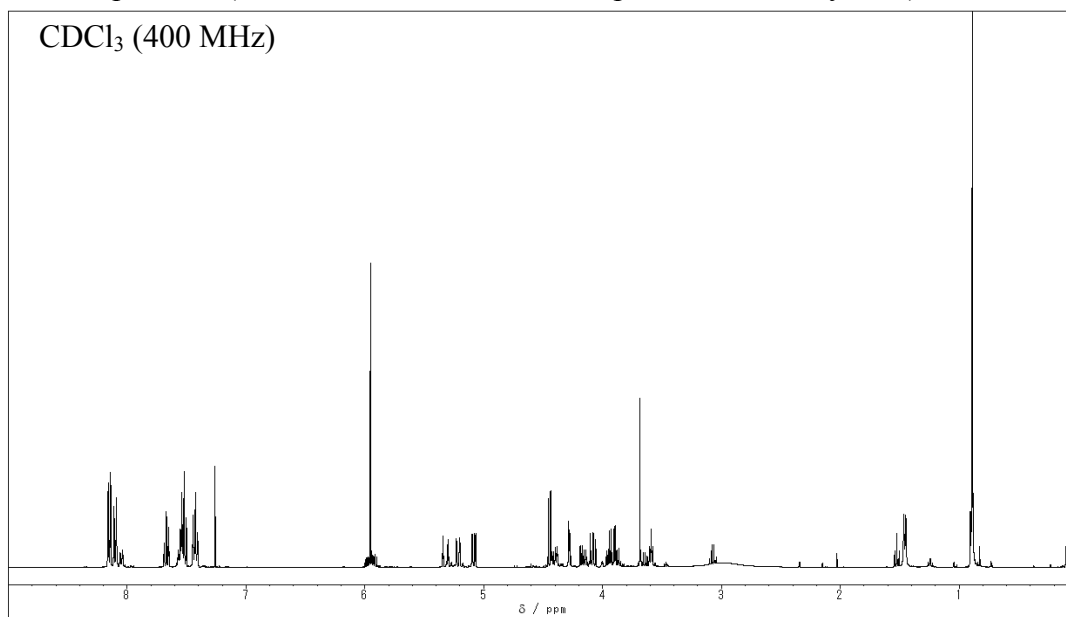

$^1\text{H}$ -NMR spectrum (crude reaction mixture in the absence of catalyst **1d**)

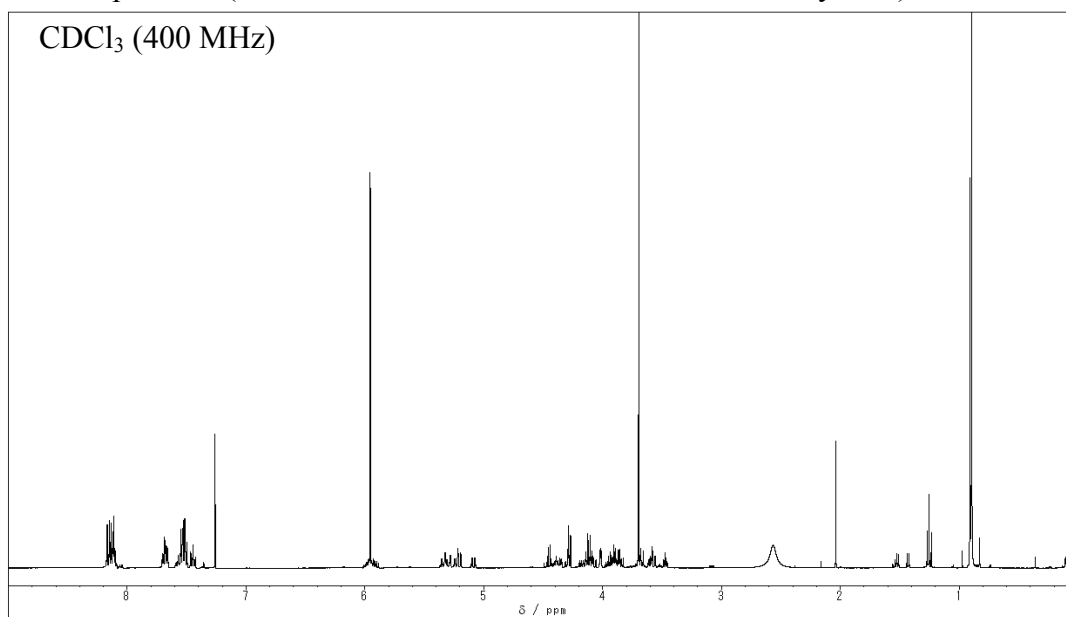

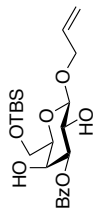

**3d**

<sup>1</sup>H-NMR spectrum of **3d**

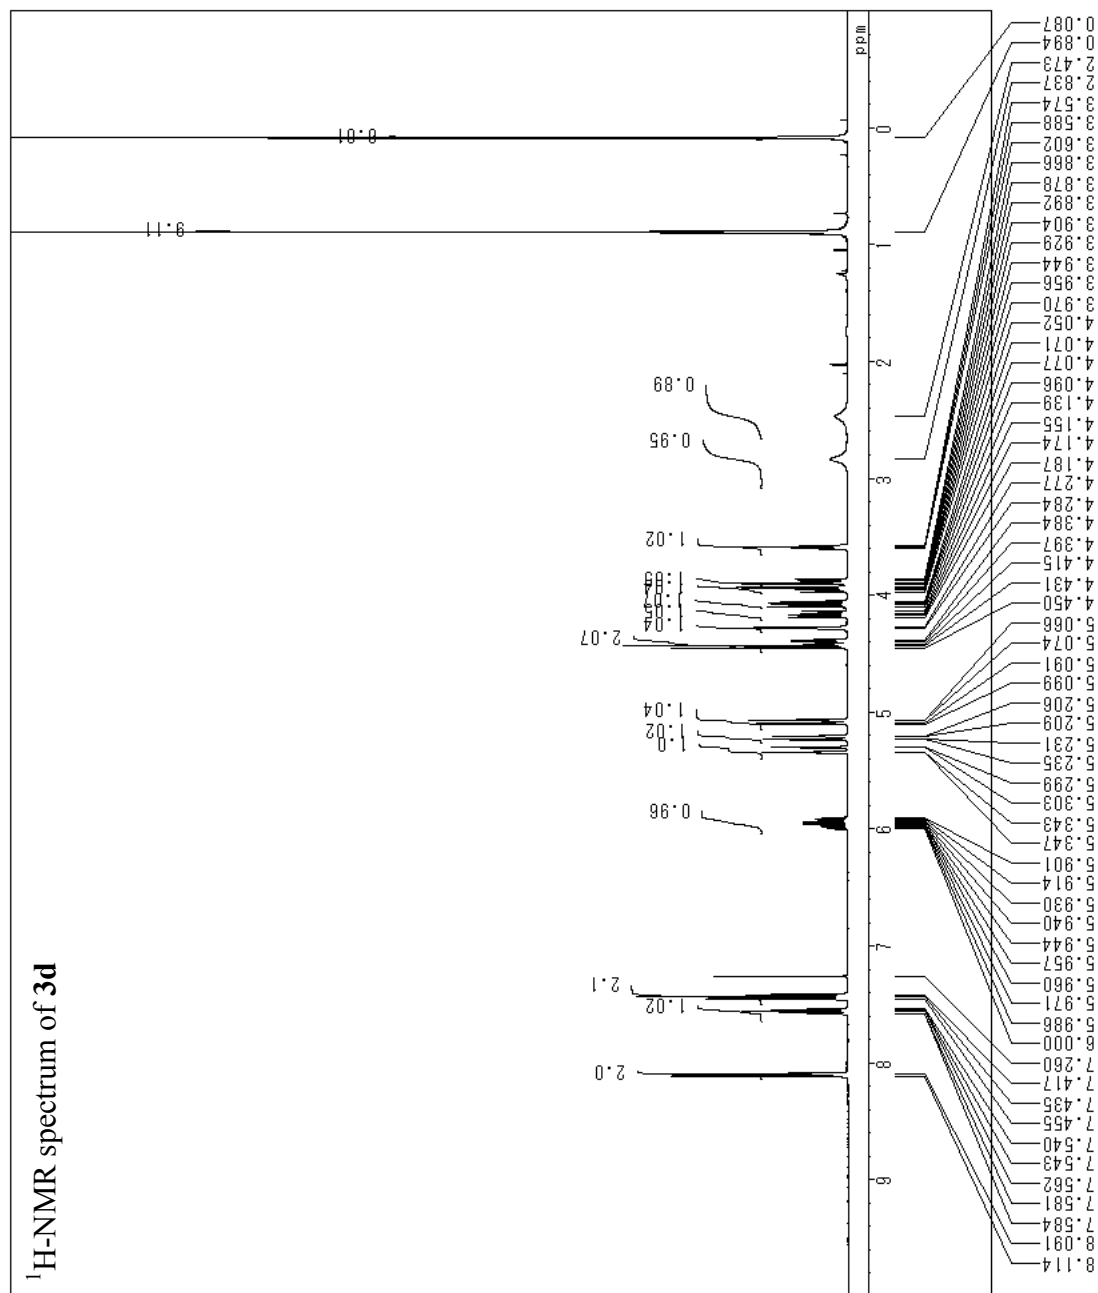

Comment TSV25026\_pure\_13C\_COSY\_2  
0190114\_01  
Date 2019/Jan/14  
ObsNuc <sup>1</sup>H  
ExMode PROTON\_001  
ObsFreq 399.45 MHz  
Scan 16  
AcqTime 2.589 s  
Acc. Interval 5.589 s  
Spinning 16.0 Hz  
Temperature 25.0 °C  
Solvent cdcl3

$^1\text{H}$ - $^1\text{H}$  COSY spectrum of **3d**

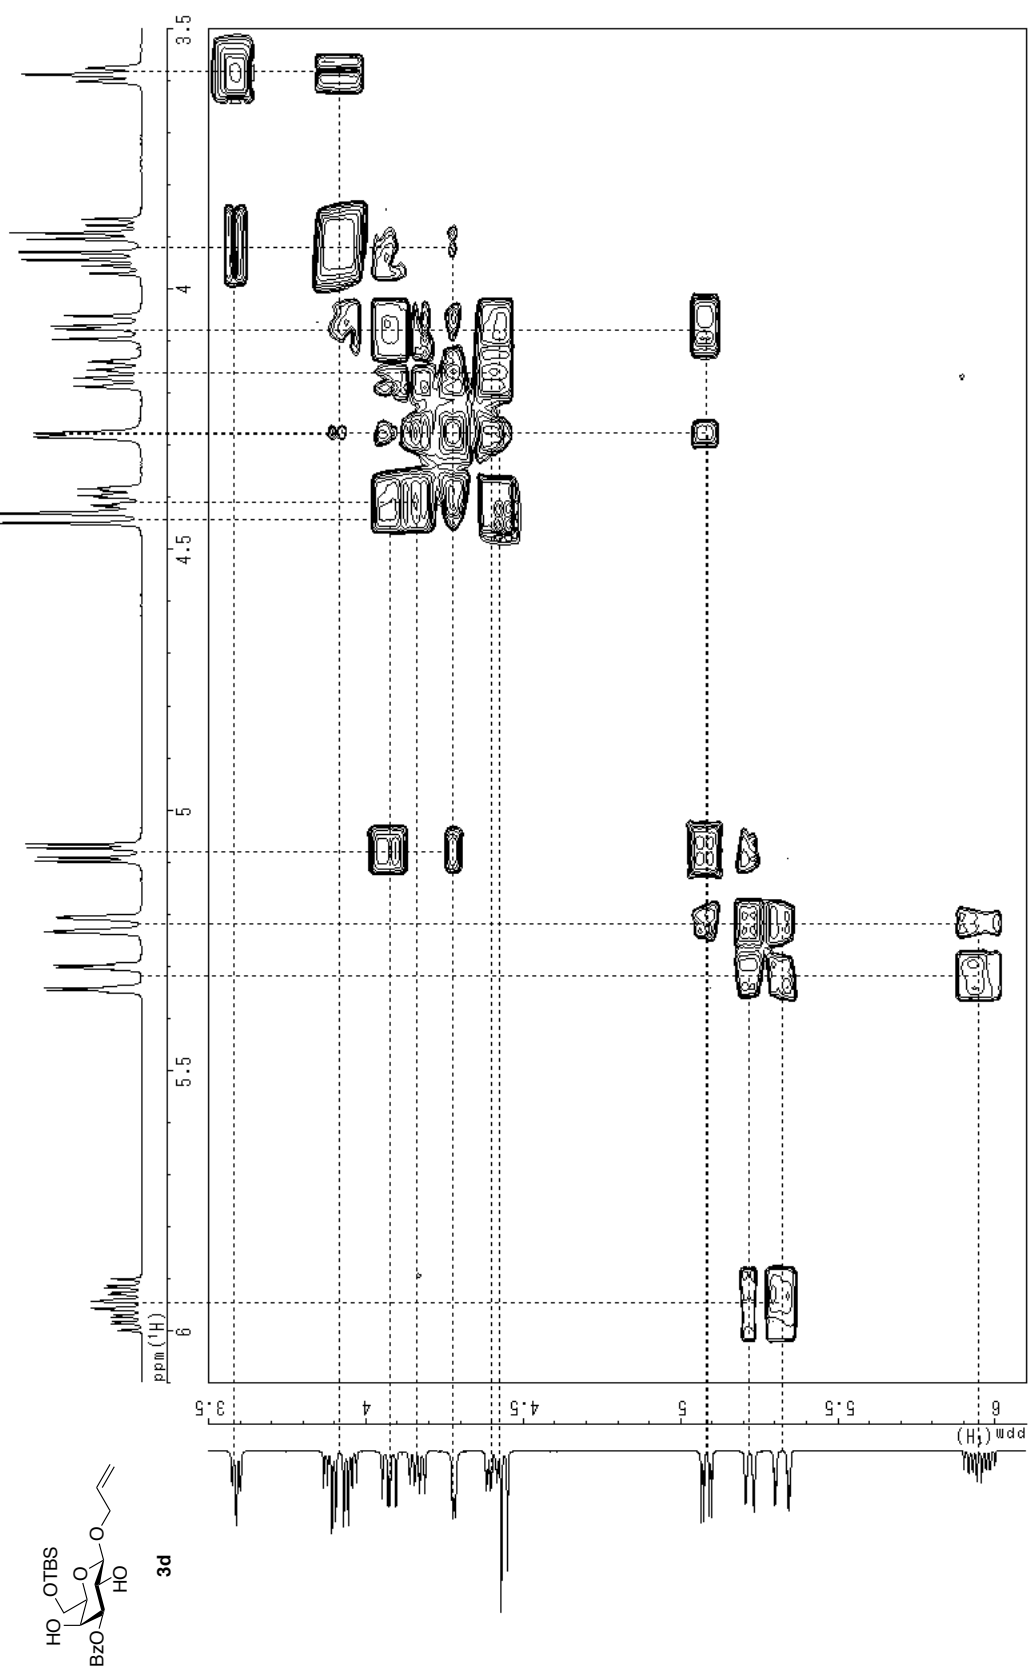

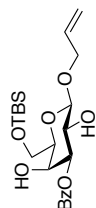

**3d**

<sup>13</sup>C-NMR spectrum of **3d**

Comment TSV25026\_pure\_13C\_COSY\_2  
 0190114\_01  
 Date 2019/Jan/14  
 ObsNuc <sup>13</sup>C  
 ExMode CARBON\_001  
 ObsFreq 100.45 MHz  
 Scan 512  
 AcqTime 1.3631 s  
 Acc. Interval 3.3631 s  
 Spinning 20.0 Hz  
 Temperature 25.0 °C  
 Solvent cdcl<sub>3</sub>

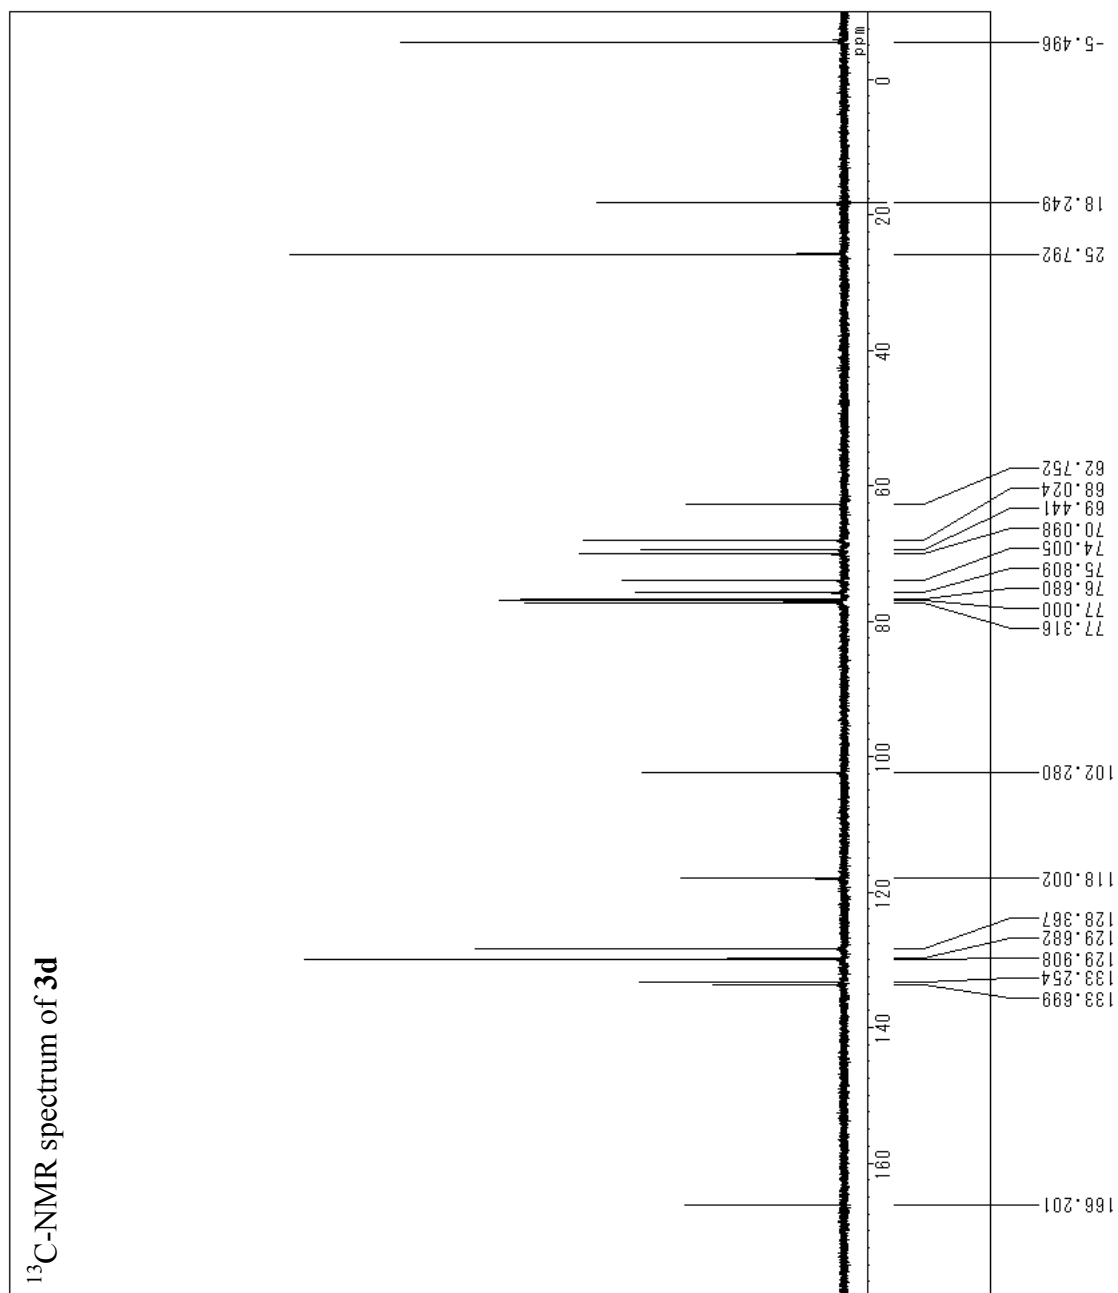

Propargyl 6-((*tert*-butyldimethylsilyl)oxy)-3-*O*-benzoyl- $\beta$ -D-galactopyranoside (**3e**)

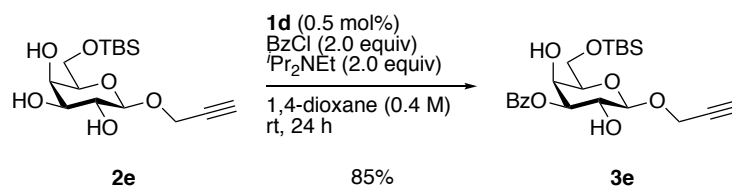

<sup>1</sup>H-NMR spectrum (crude reaction mixture in the presence of catalyst **1d**)

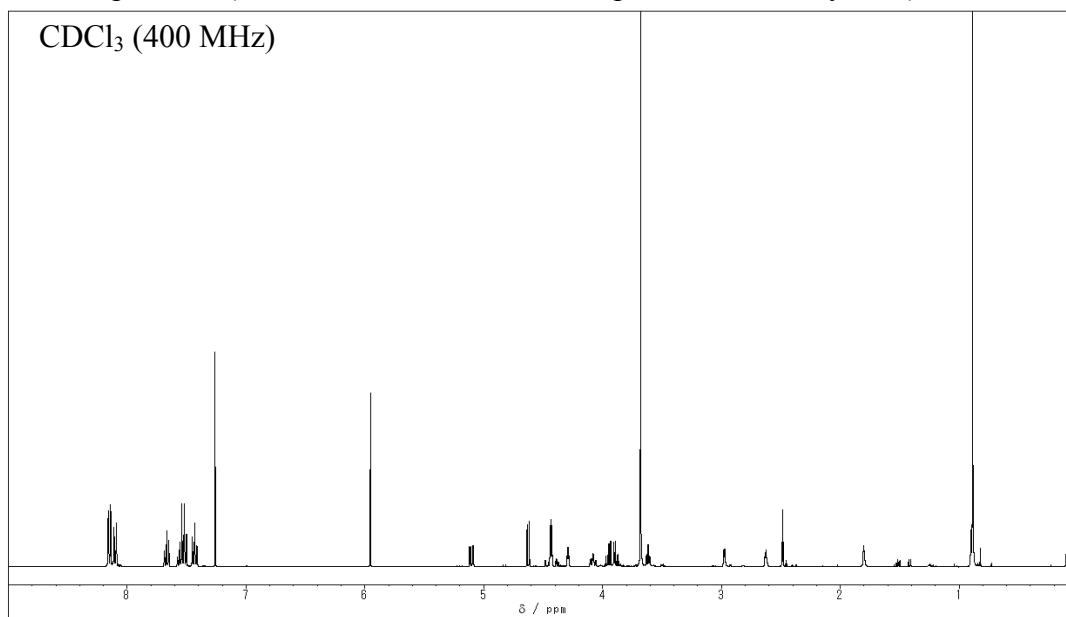

<sup>1</sup>H-NMR spectrum (crude reaction mixture in the absence of catalyst **1d**)

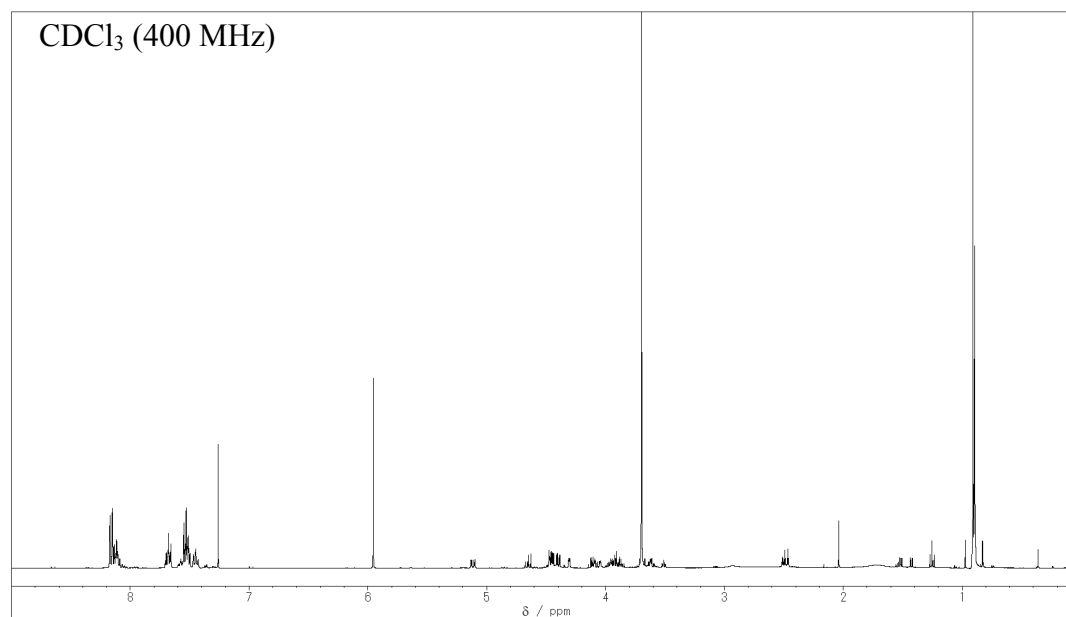

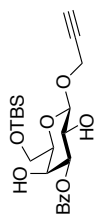

**3e**

Comment TSV09016\_COSY\_20160801\_0  
 1  
 Date 2016/Aug/01  
 ObsNuc <sup>1</sup>H  
 ExMode PROTON\_001  
 ObsFreq 399.45 MHz  
 Scan 16  
 AcqTime 2.589 s  
 Acc. Interval 5.589 s  
 Spinning 16.0 Hz  
 Temperature 25.0 °C  
 Solvent cdcl<sub>3</sub>

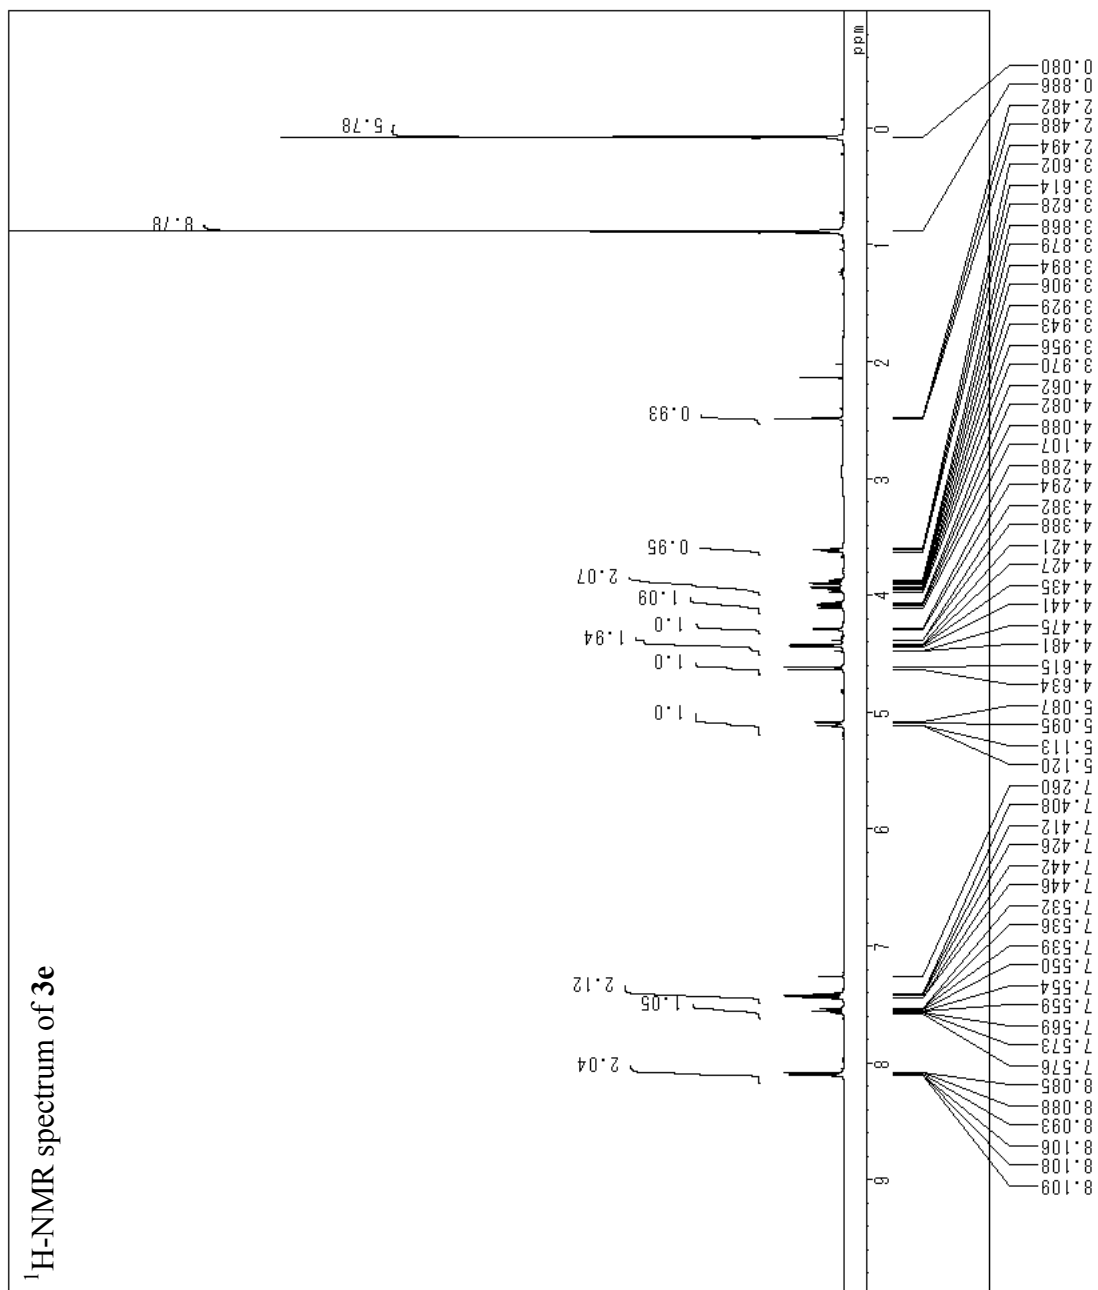

$^1\text{H}$ - $^1\text{H}$  COSY spectrum of **3e**

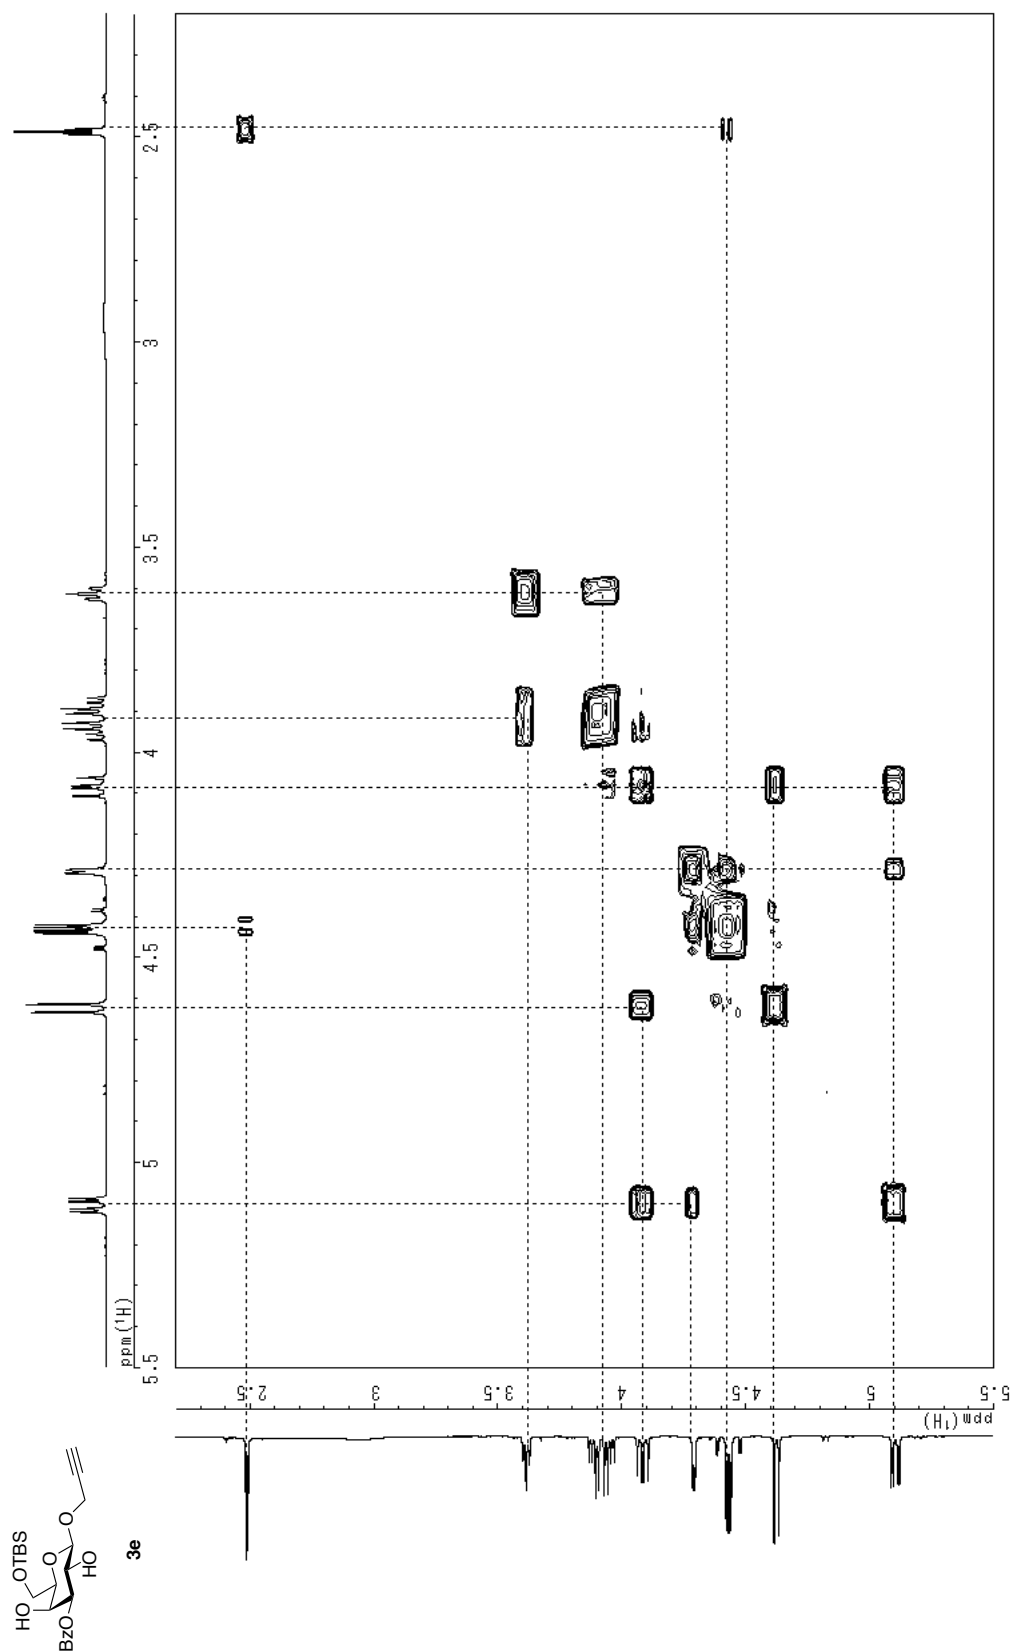



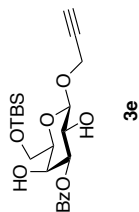

<sup>13</sup>C-NMR spectrum of **3e**

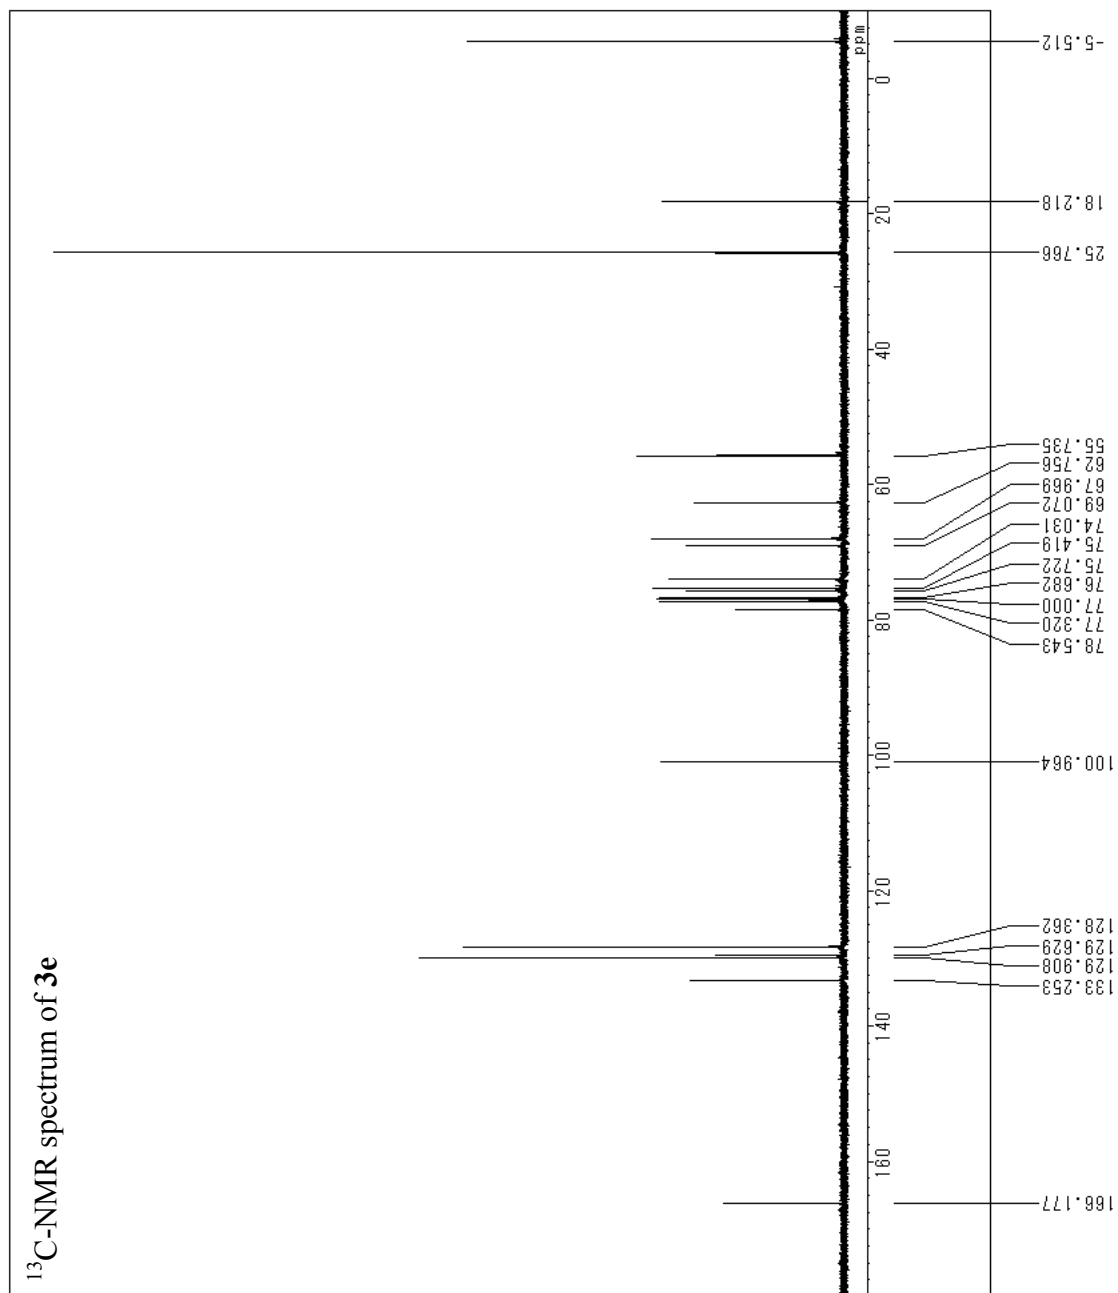

Comment TSV09016\_13C\_2\_20180801  
 01  
 Date 2018/Aug/01  
 ObsNuc <sup>13</sup>C  
 ExMode CARBON\_001  
 ObsFreq 100.45 MHz  
 Scan 256  
 AcqTime 1.3831 s  
 Acc. Interval 3.3831 s  
 Spinning 20.0 Hz  
 Temperature 25.0 °C  
 Solvent cdcl<sub>3</sub>

Phenylthio 6-((*tert*-butyldimethylsilyl)oxy)-3-*O*-benzoyl- $\beta$ -D-galactopyranoside (**3f**)

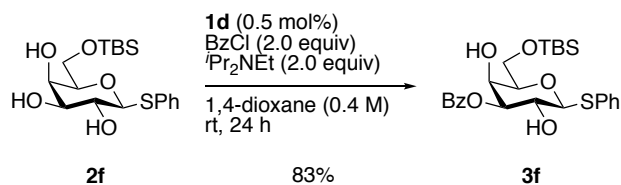

$^1\text{H-NMR}$  spectrum (crude reaction mixture in the presence of catalyst **1d**)

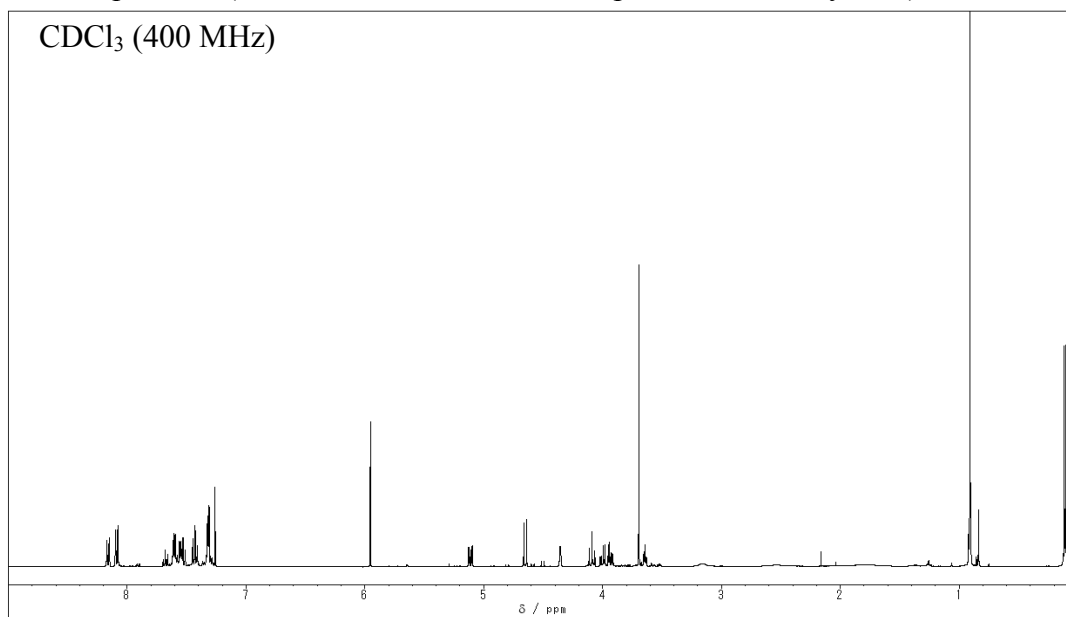

$^1\text{H-NMR}$  spectrum (crude reaction mixture in the absence of catalyst **1d**)

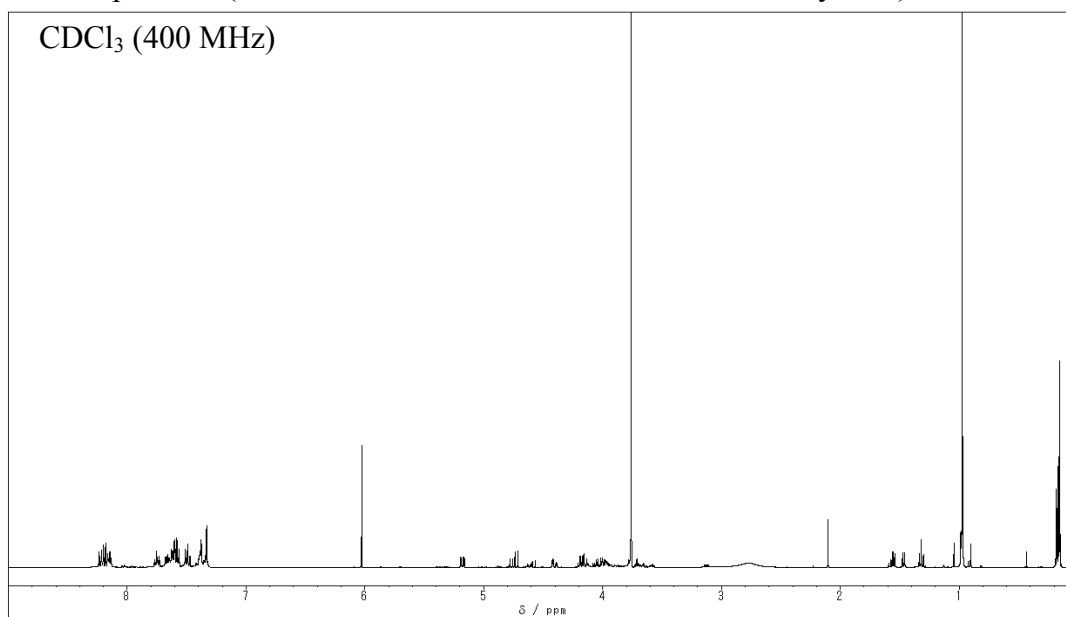

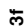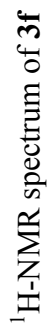

|               |                |  |
|---------------|----------------|--|
| Comment       | 1              |  |
| Date          | 2016/Jul/12    |  |
| ObsNuc        | <sup>1</sup> H |  |
| ExMode        | PROTON_001     |  |
| ObsFreq       | 399.45 MHz     |  |
| Scan          | 8              |  |
| AcqTime       | 2.569 s        |  |
| Acc. Interval | 5.569 s        |  |
| Spinning      | 16.0 Hz        |  |
| Temperature   | 25.0 °C        |  |
| Solvent       | cdcl3          |  |

Chemical structure of **3f** is shown as a chair conformation of a cyclohexane ring with an OTBS group at C1 (axial), a BzO group at C2 (equatorial), and a Ph group at C3 (equatorial).

<sup>1</sup>H NMR spectrum (CDCl<sub>3</sub>) of **3f** is displayed, showing peaks from 2.5 to 5.5 ppm. Key assignments include: aromatic protons (7.2-7.4 ppm), BzO protons (4.5-4.7 ppm), C3-H (3.9 ppm), C2-H (3.7 ppm), C1-H (2.5 ppm), and solvent (7.26 ppm). Integration values are provided for several peaks.



Methyl 6-((*tert*-butyldimethylsilyl)oxy)-3-*O*-benzoyl- $\alpha$ -D-mannopyranoside (**3g**)

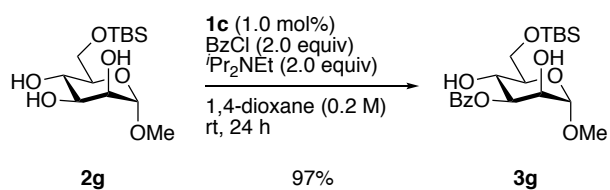

$^1\text{H-NMR}$  spectrum (crude reaction mixture in the presence of catalyst **1c**)

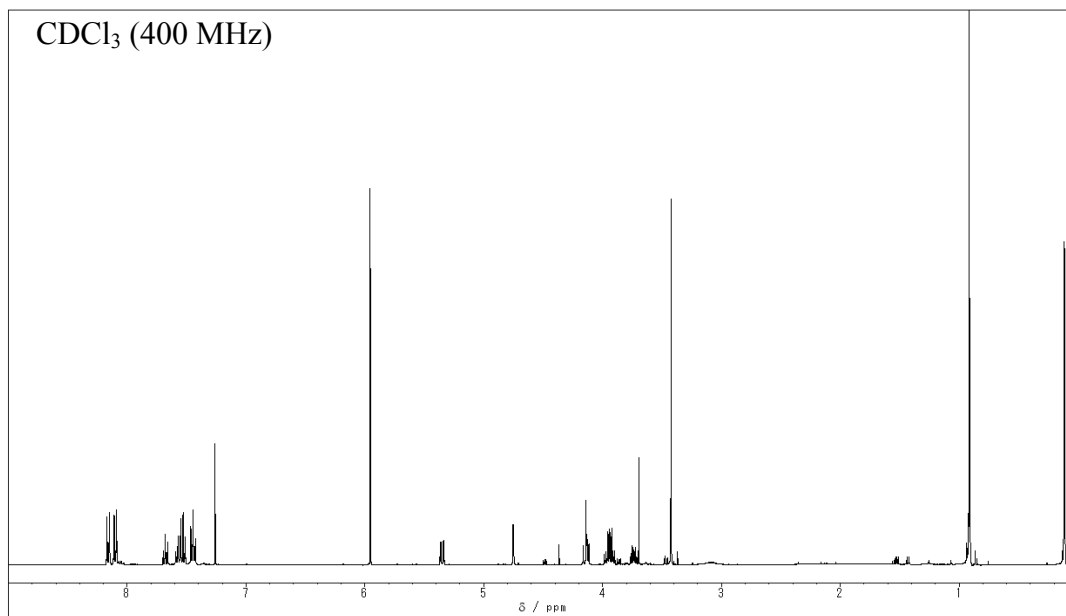

$^1\text{H-NMR}$  spectrum (crude reaction mixture in the absence of catalyst **1c**)

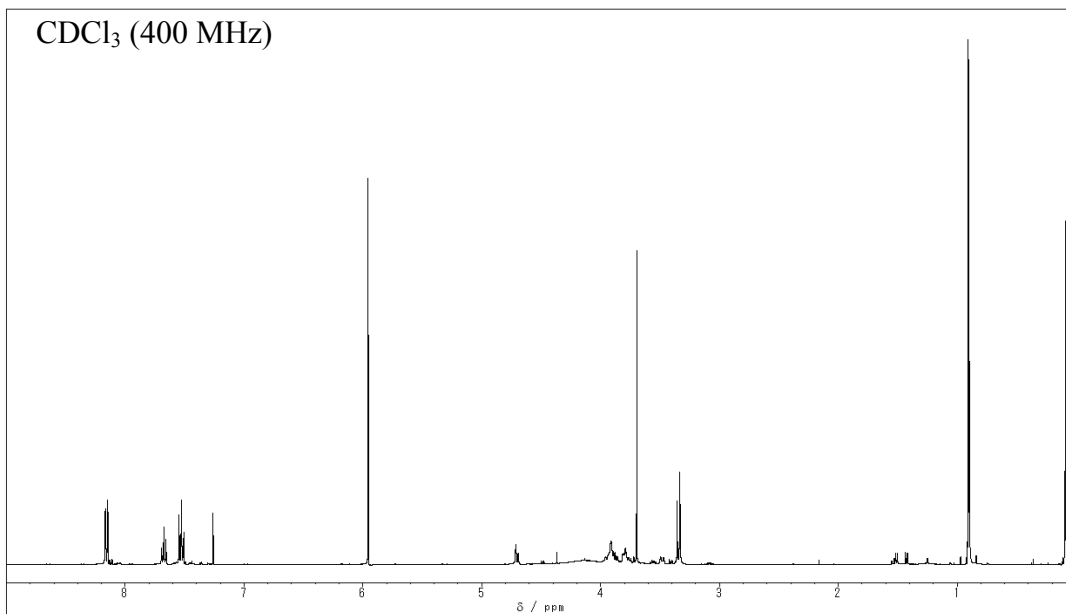

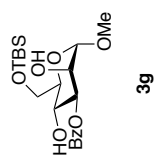

|             |               |
|-------------|---------------|
| Comment     | 2016/Mar/25   |
| Date_01     | 1H            |
| ObsNuc      | PROTON_001    |
| ObsMuc      | 399.45 MHz    |
| ExMode      | 16            |
| ObsFreq     | 2.568 s       |
| Scan        | 5.569 s       |
| AcqTime     | Acc. Interval |
| Spinning    | 16.0 Hz       |
| Temperature | 25.0 °C       |
| Solvent     | cdcl3         |

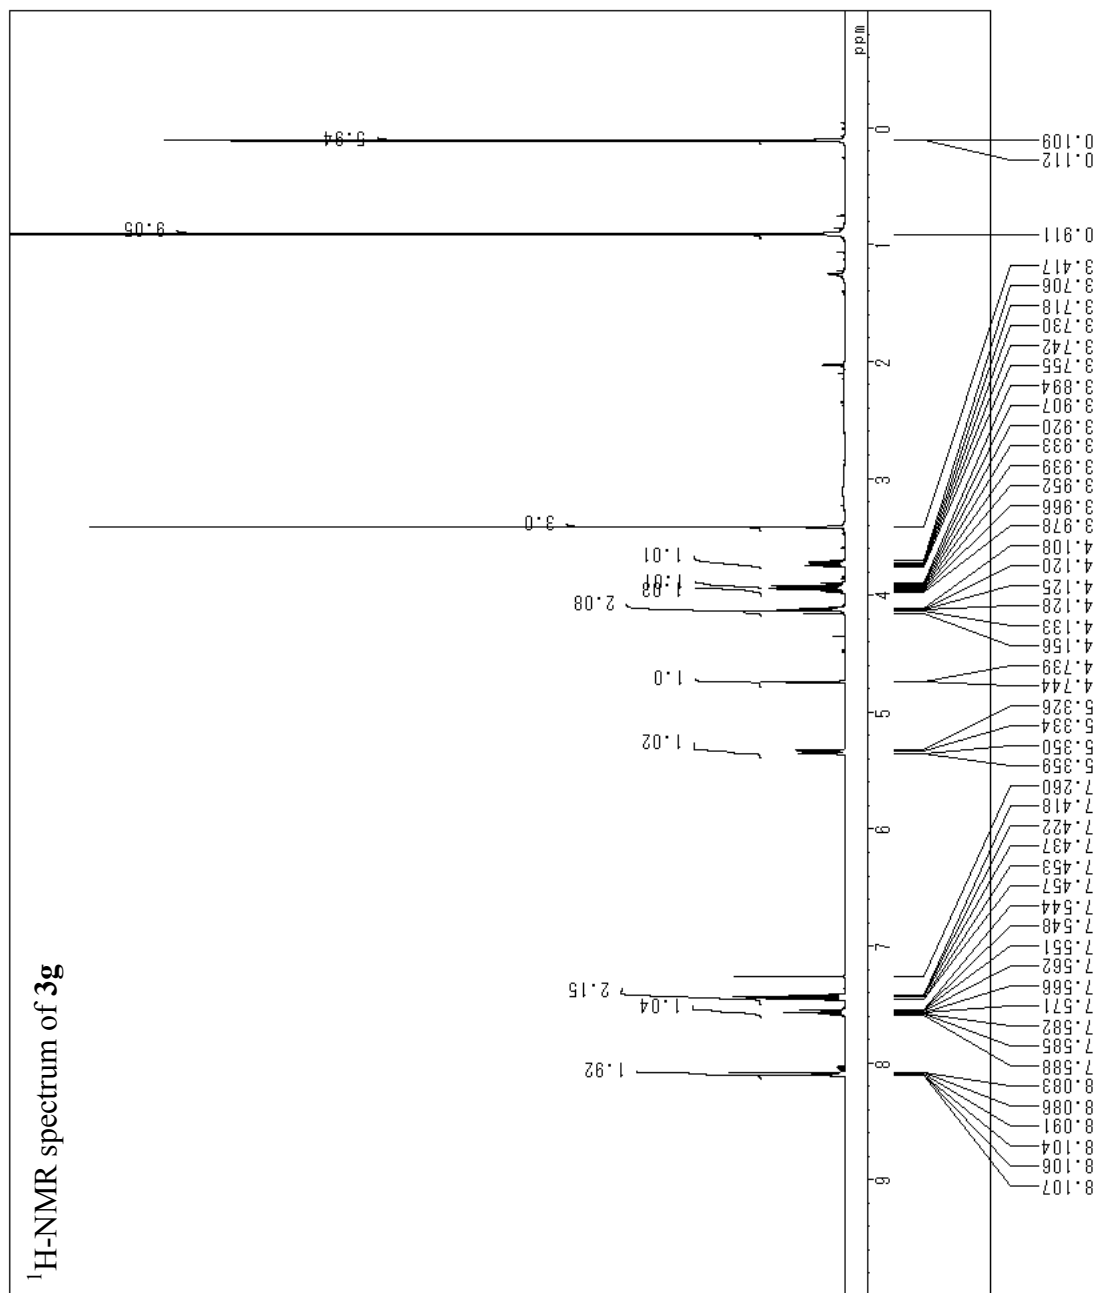

$^1\text{H}$ - $^1\text{H}$  COSY spectrum of **3g**

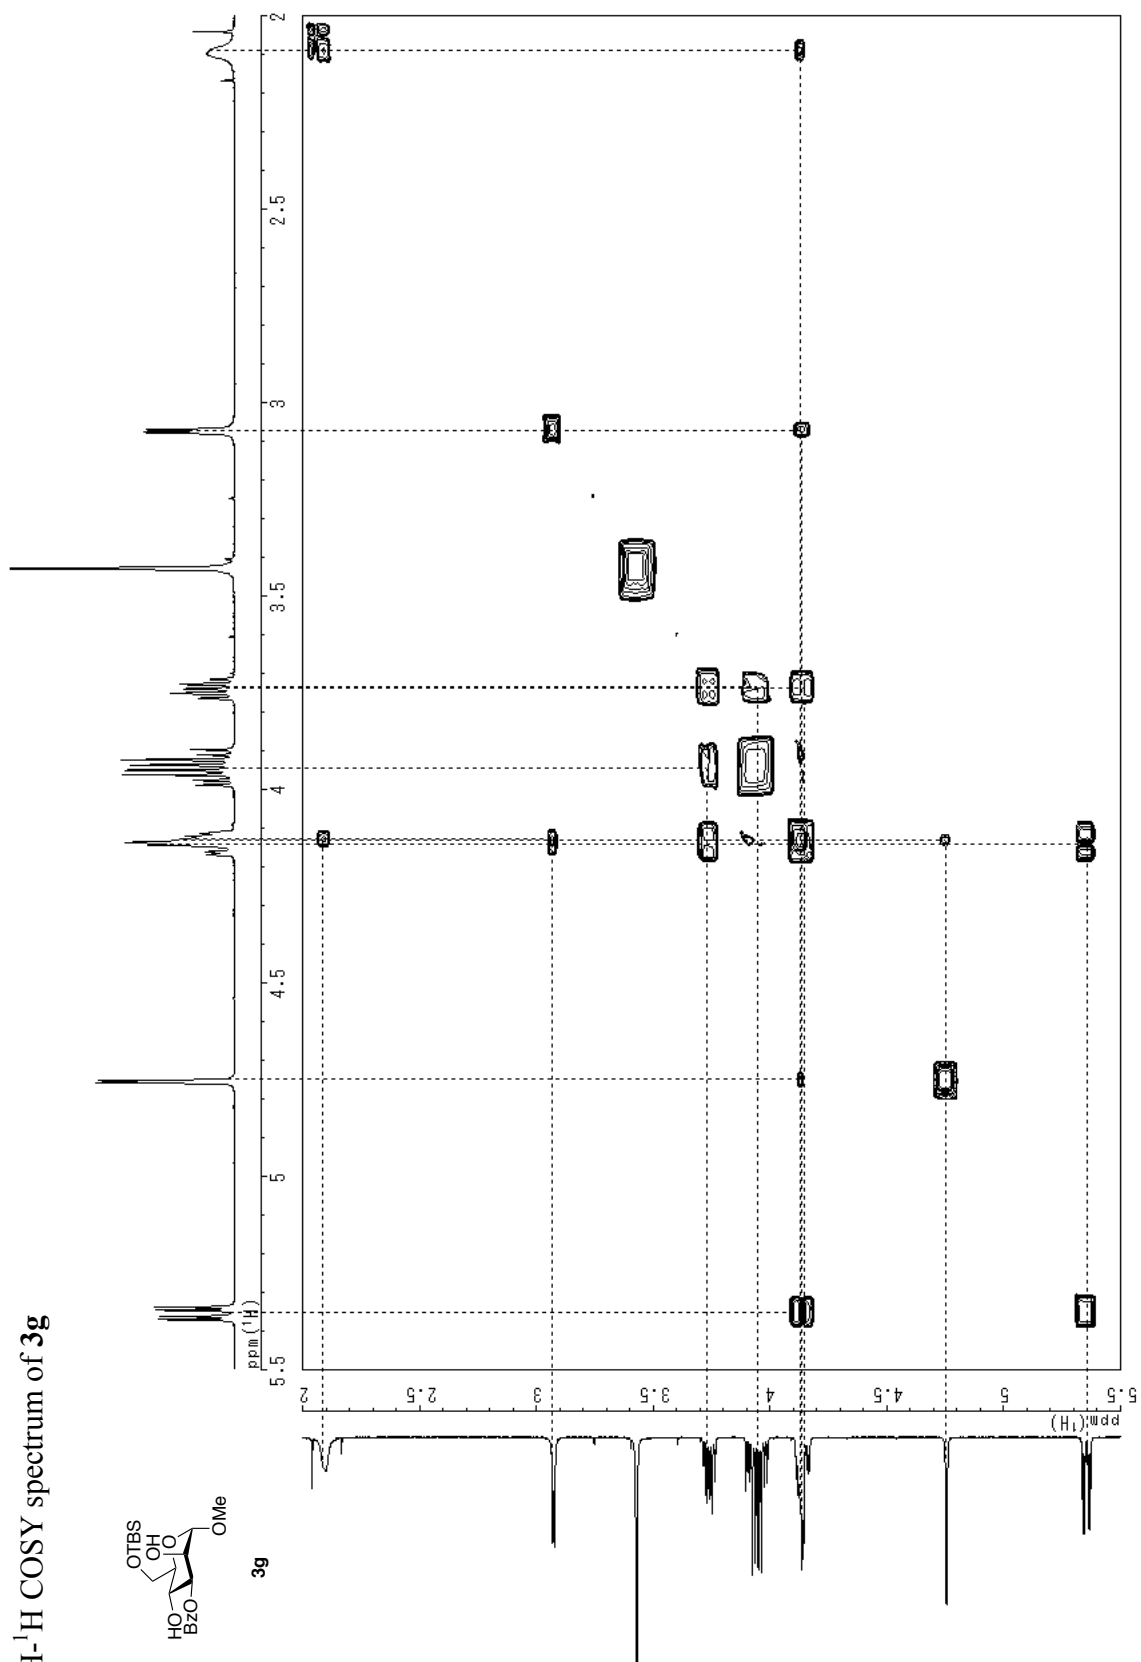



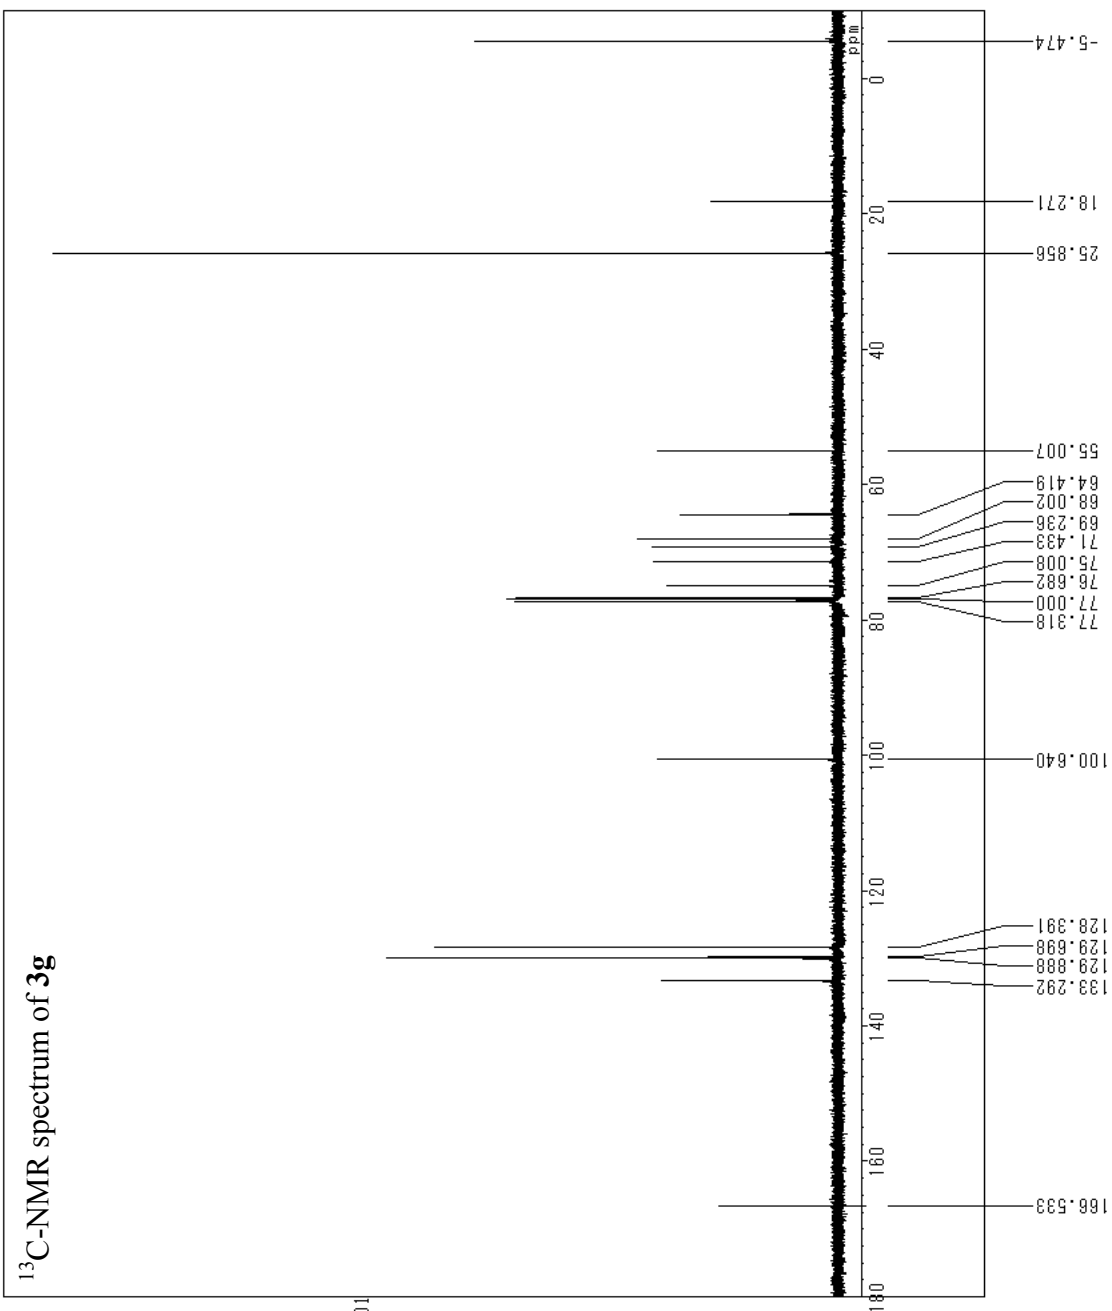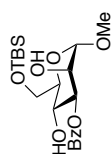

**3g**

Comment TSV05029\_13C\_20180325\_01  
 Date 2016/Mar/25  
 ObsNuc <sup>13</sup>C  
 ExMode CARBON\_001  
 ObsFreq 100.45 MHz  
 Scan 256  
 AcqTime 1.3631 s  
 Acc. Interval 3.3631 s  
 Spinning 20.0 Hz  
 Temperature 25.0 °C  
 Solvent cdcl<sub>3</sub>

Methyl 6-((*tert*-butyldimethylsilyl)oxy)-2-*O*-benzoyl- $\alpha$ -D-mannopyranoside (**SI-4**)

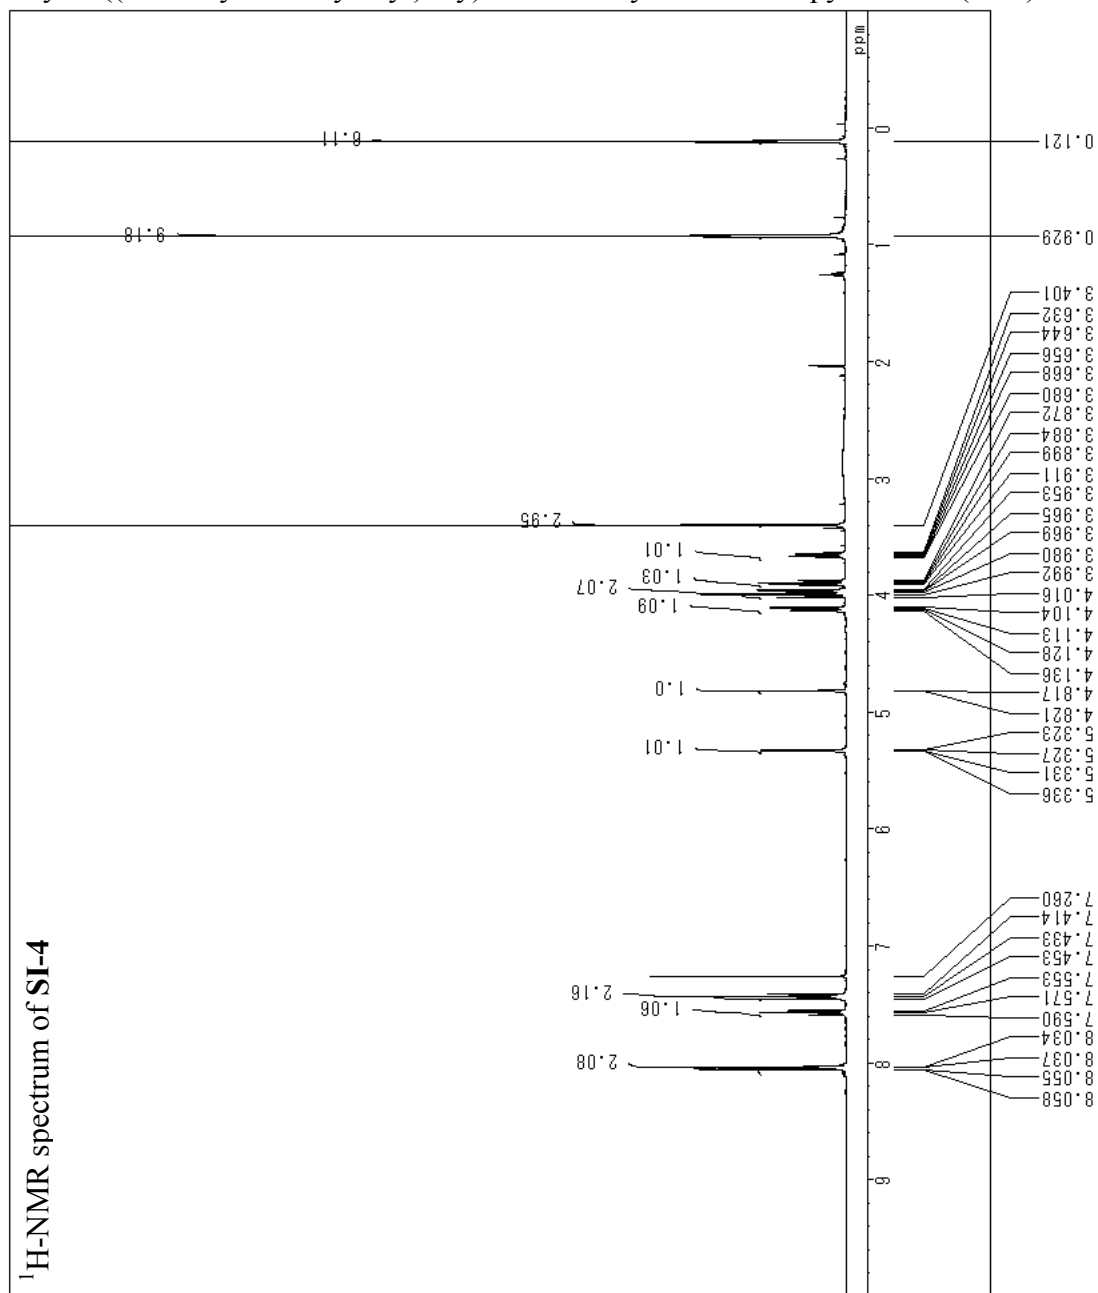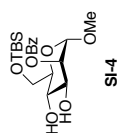

Comment TSV25019\_pure\_13C\_COSY\_2  
0181225\_01  
Date 2018/Dec/25  
ObsNuc <sup>1</sup>H  
ExMode PROTON\_001  
ObsFreq 399.45 MHz  
Scan 16  
AcqTime 2.588 s  
Acc.Interval 5.588 s  
Spinning 16.0 Hz  
Temperature 25.0 °C  
Solvent cdcl3

$^1\text{H}$ - $^1\text{H}$  COSY spectrum of **SI-4**

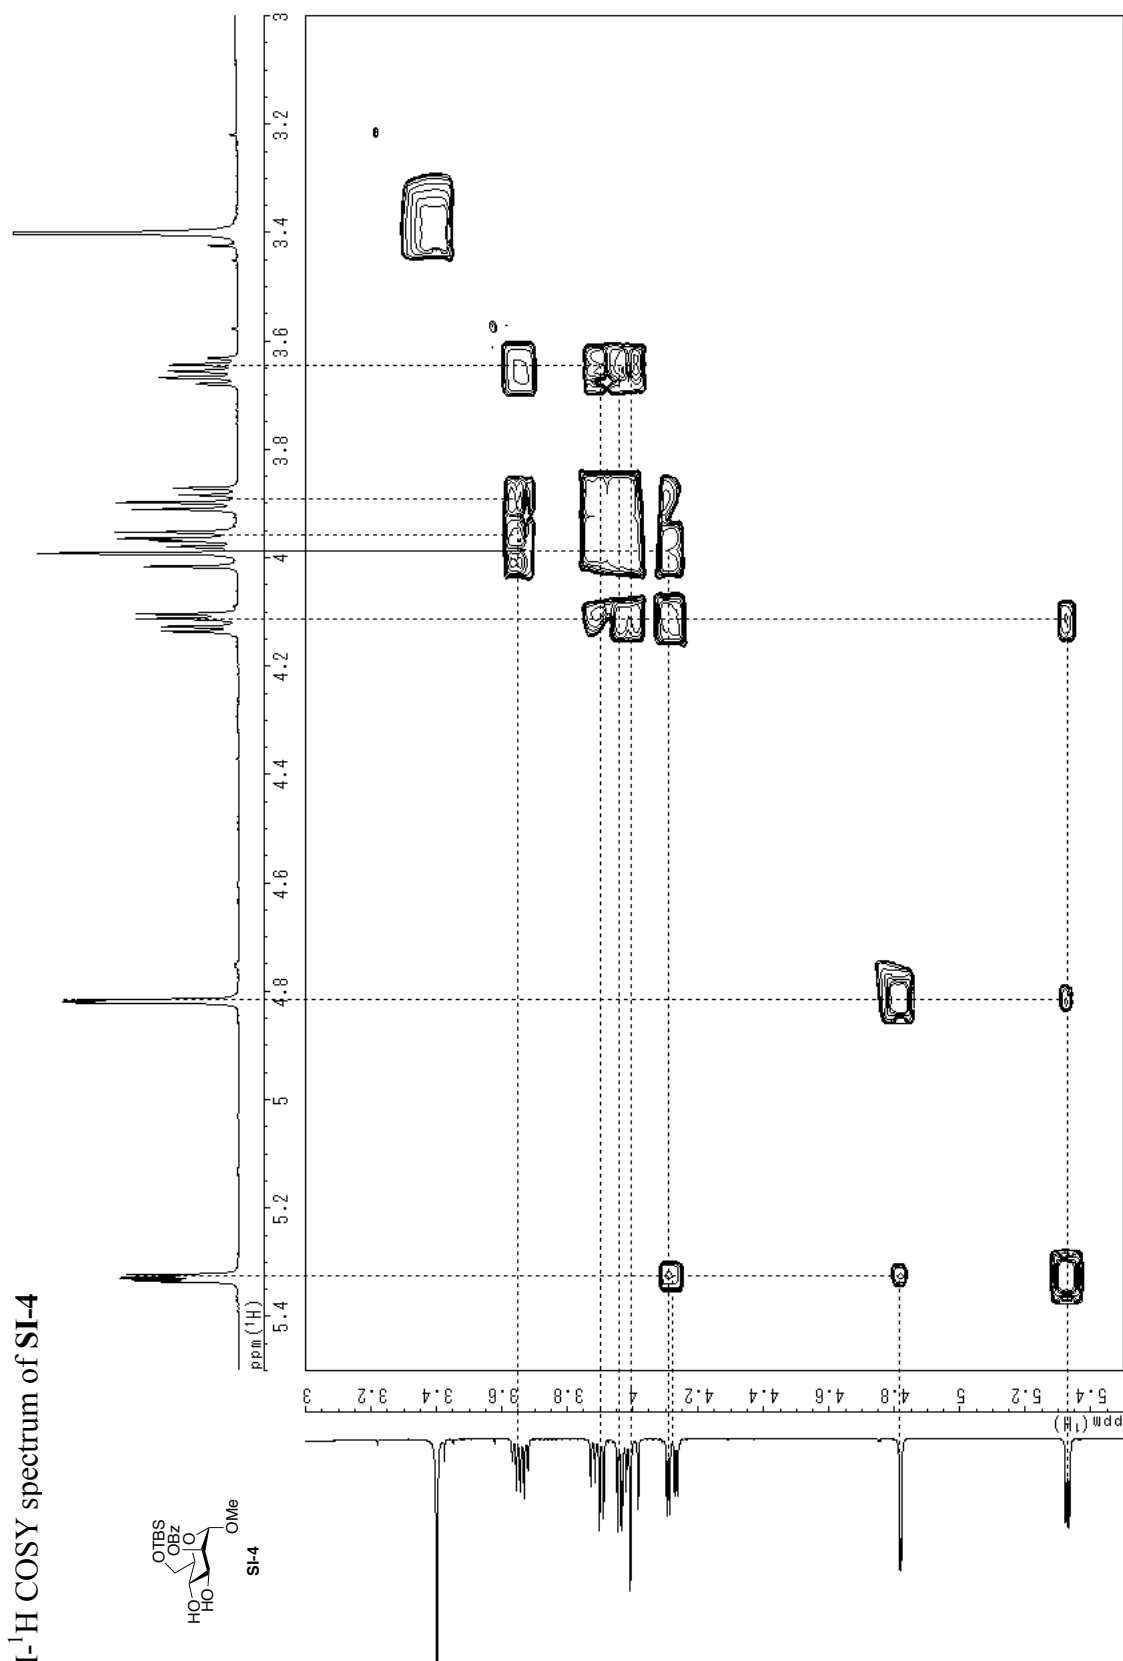

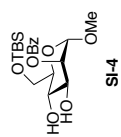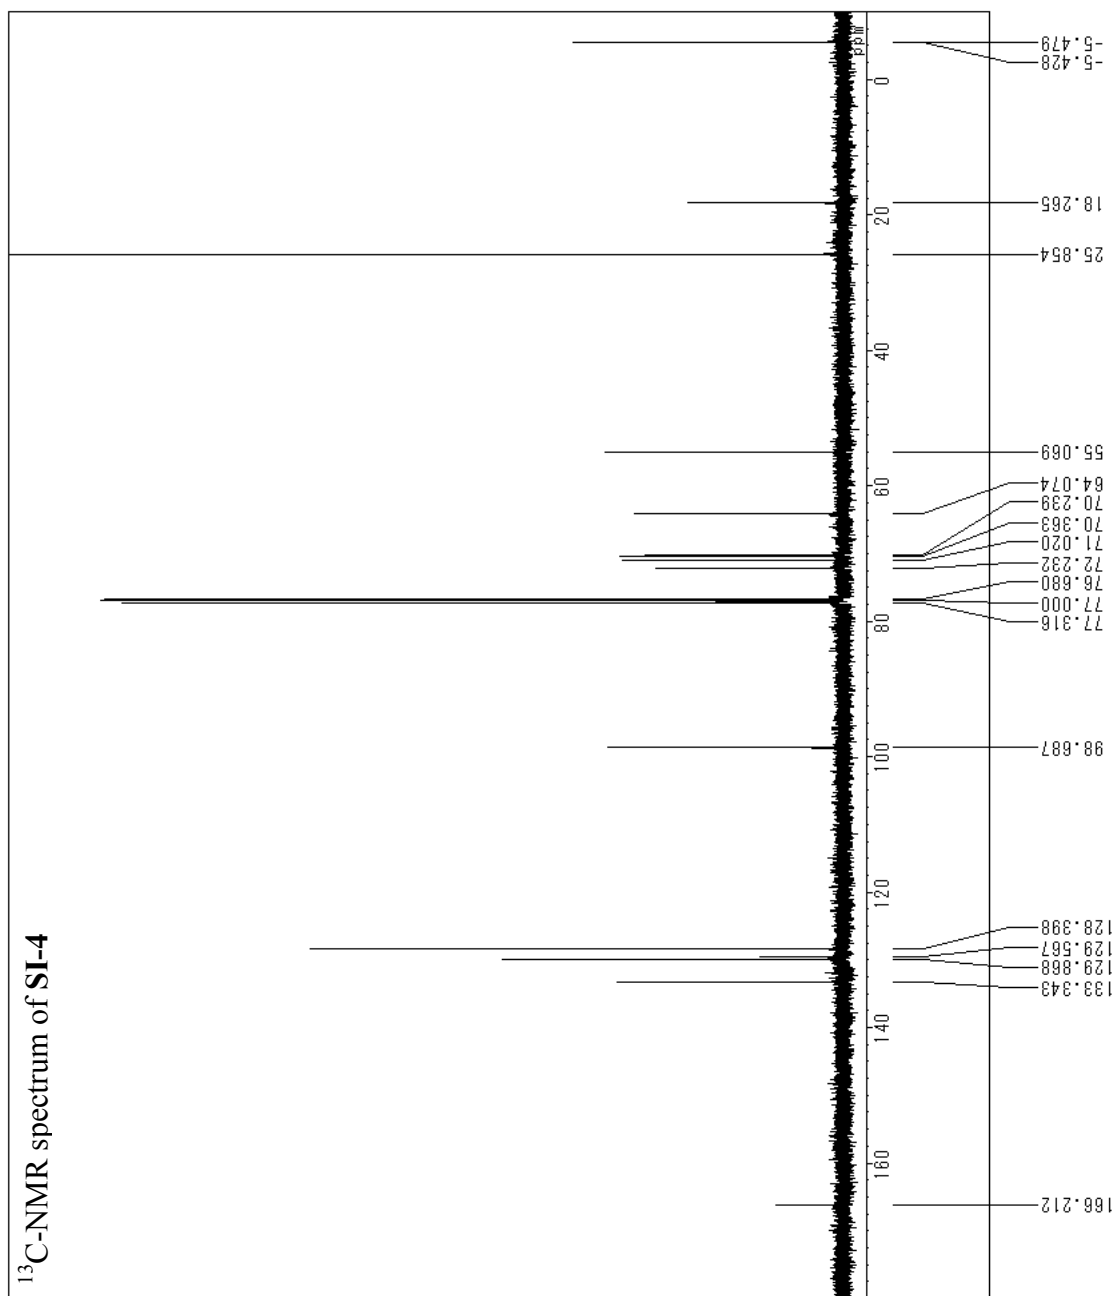

Comment TSY25019\_pure\_13C\_COSY\_2  
 0181225\_01  
 Date 2018/Dec/25  
 ObsNuc <sup>13</sup>C  
 ExMode CARBON\_001  
 ObsFreq 100.45 MHz  
 Scan 512  
 AcqTime 1.3831 s  
 Acc. Interval 3.3631 s  
 Spinning 20.0 Hz  
 Temperature 25.0 °C  
 Solvent cdcl3

Methyl 3-*O*-benzoyl- $\alpha$ -L-rhamnopyranoside (**3h**)

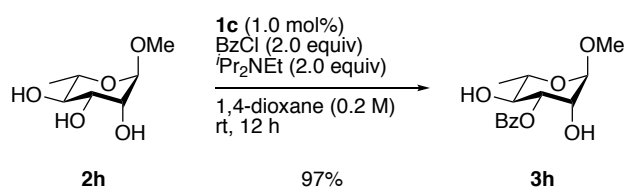

$^1\text{H}$ -NMR spectrum (crude reaction mixture in the presence of catalyst **1c**)

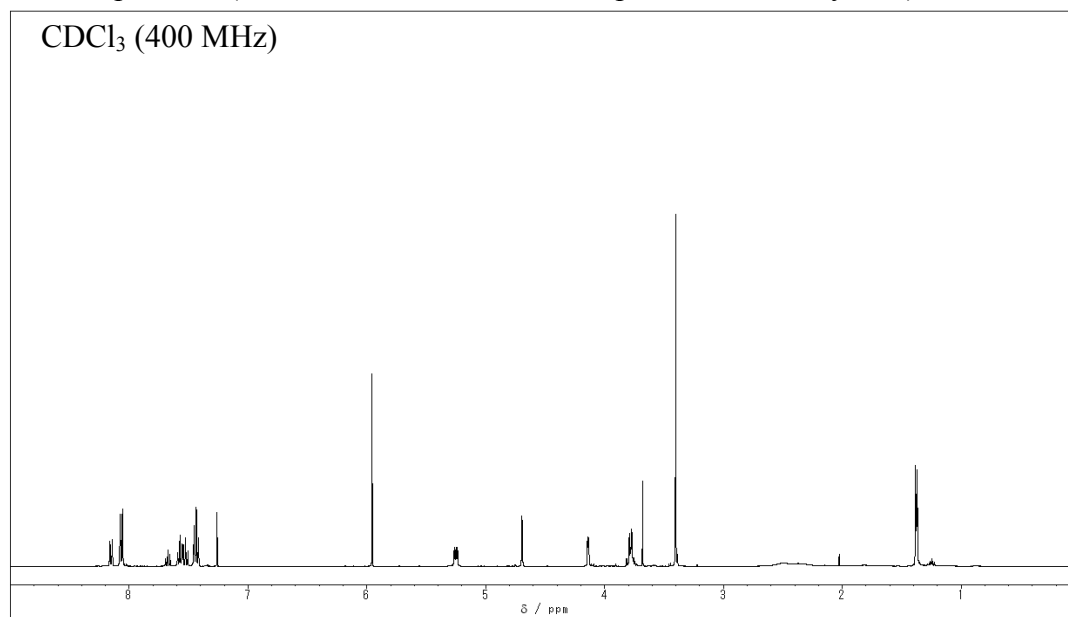

$^1\text{H}$ -NMR spectrum (crude reaction mixture in the absence of catalyst **1c**)

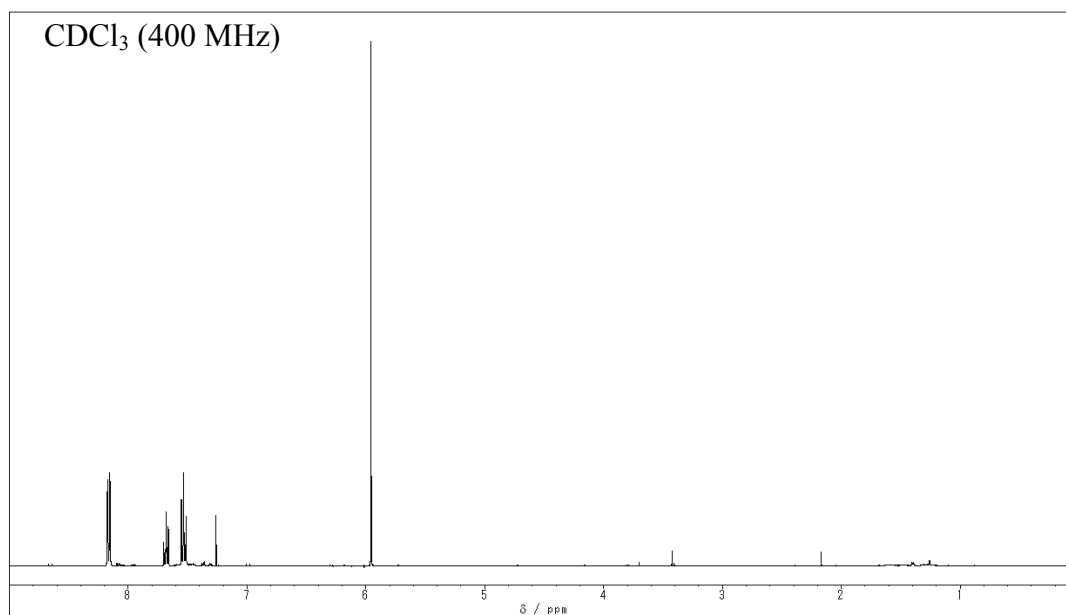

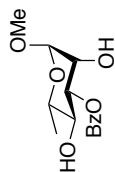

**3h**

Comment TSV05020\_column\_20180314  
 Date\_01 2018/Mar/14  
 ObsNuc  $^1\text{H}$   
 ExMode PROTON\_001  
 ObsFreq 399.45 MHz  
 Scan 32  
 AcqTime 2.589 s  
 Acc. Interval 5.589 s  
 Spinning 16.0 Hz  
 Temperature 25.0  $^{\circ}\text{C}$   
 Solvent  $\text{cdcl}_3$

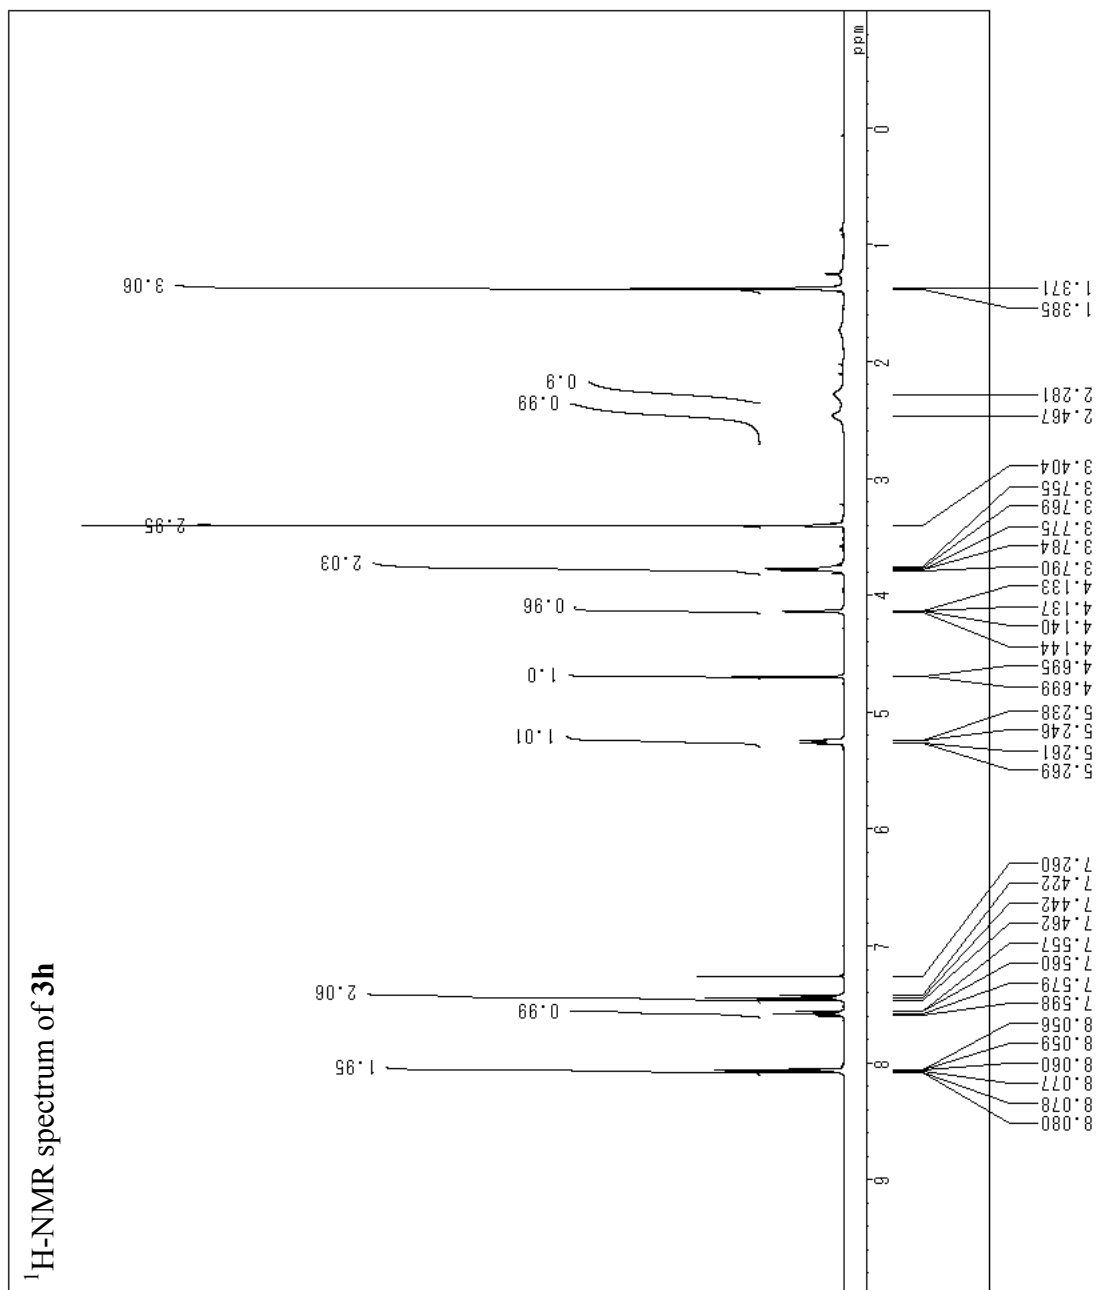

$^1\text{H}$ - $^1\text{H}$  COSY spectrum of **3h**

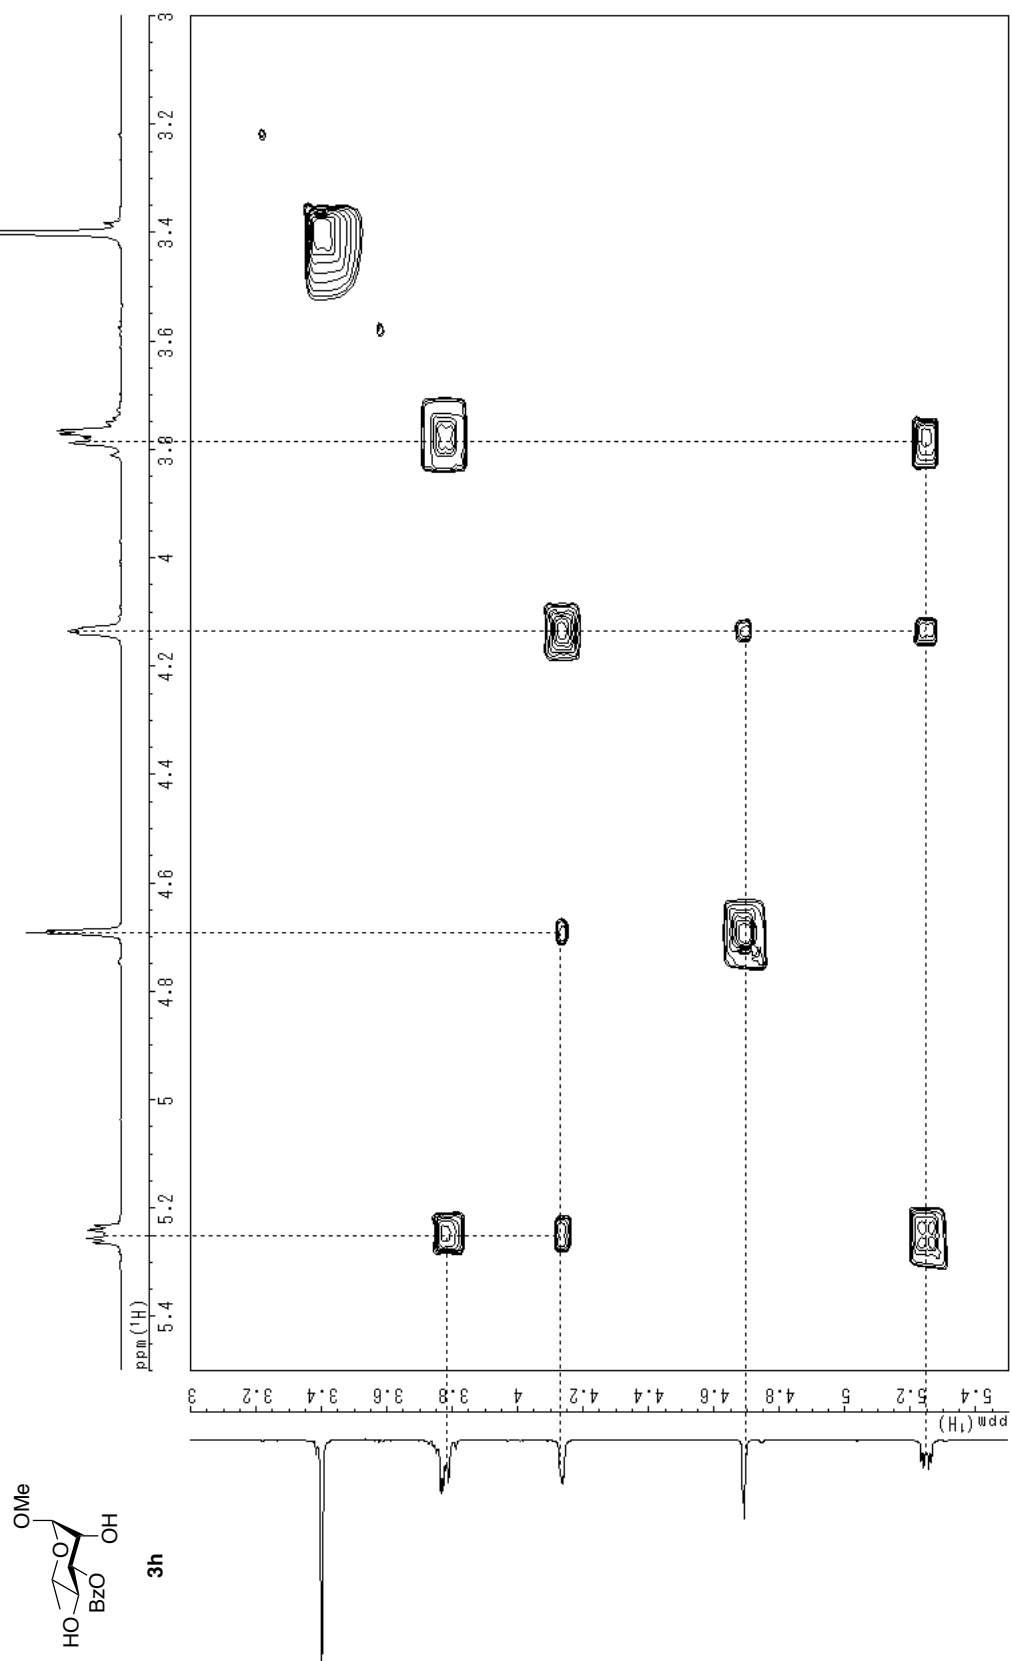

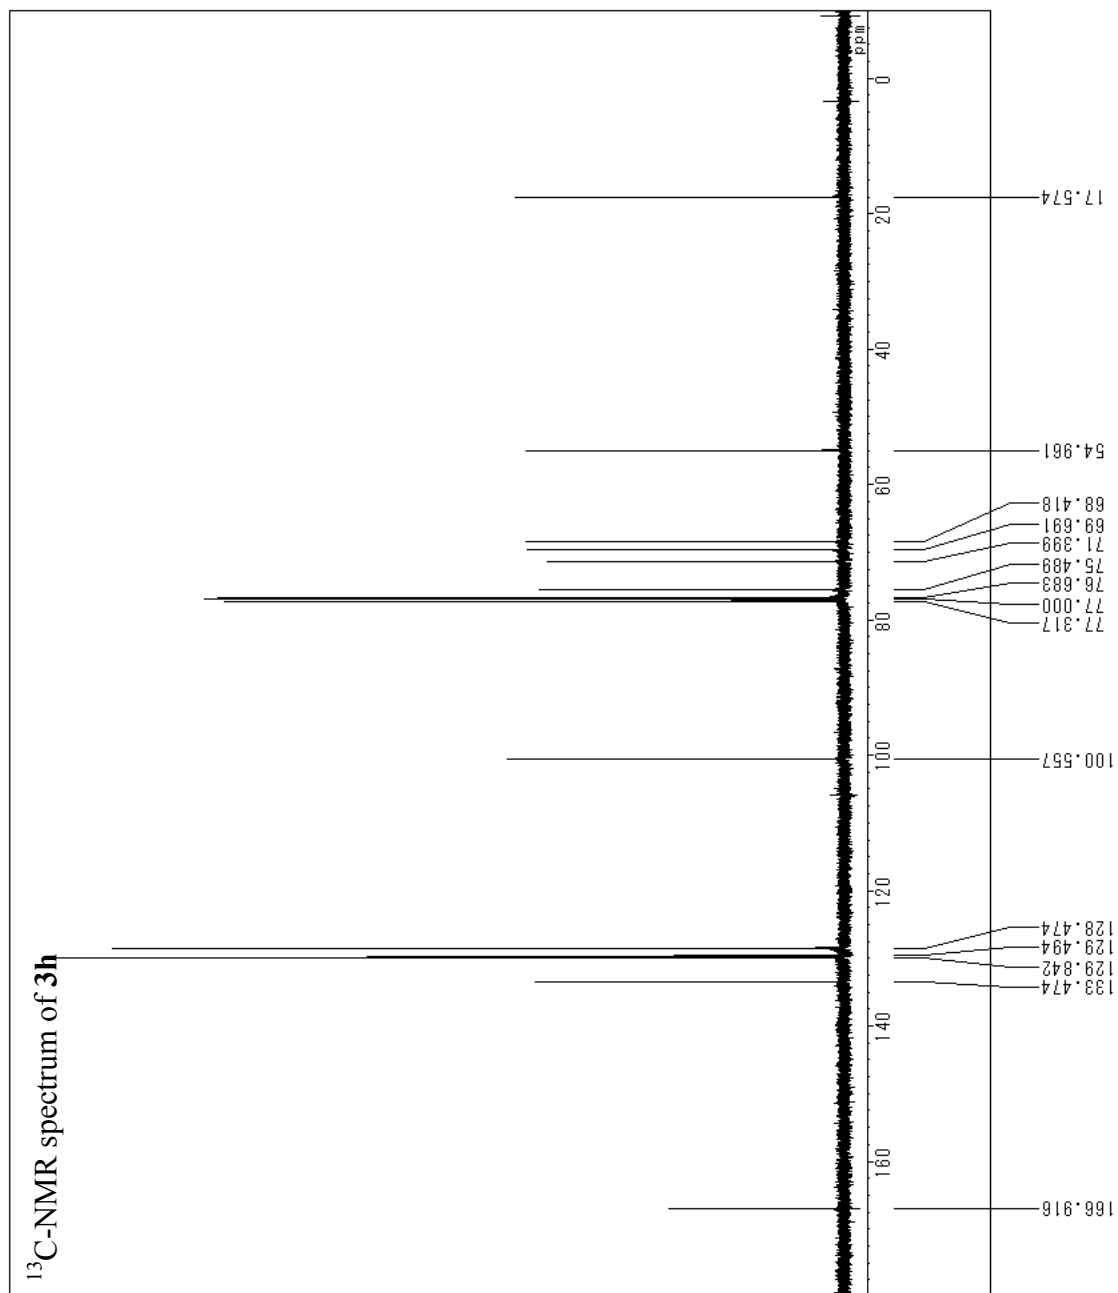

Comment TSV05020\_13C\_20180314\_01  
 Date 2016/Mar/14  
 ObsNuc <sup>13</sup>C  
 ExMode CARBON\_001  
 ObsFreq 100.66 MHz  
 Scan 512  
 AcqTime 1.3831 s  
 Acc. Interval 3.3831 s  
 Spinning 20.0 Hz  
 Temperature 25.0 °C  
 Solvent cdcl<sub>3</sub>



Methyl 2-*O*-benzoyl- $\alpha$ -L-rhamnopyranoside (SI-5)

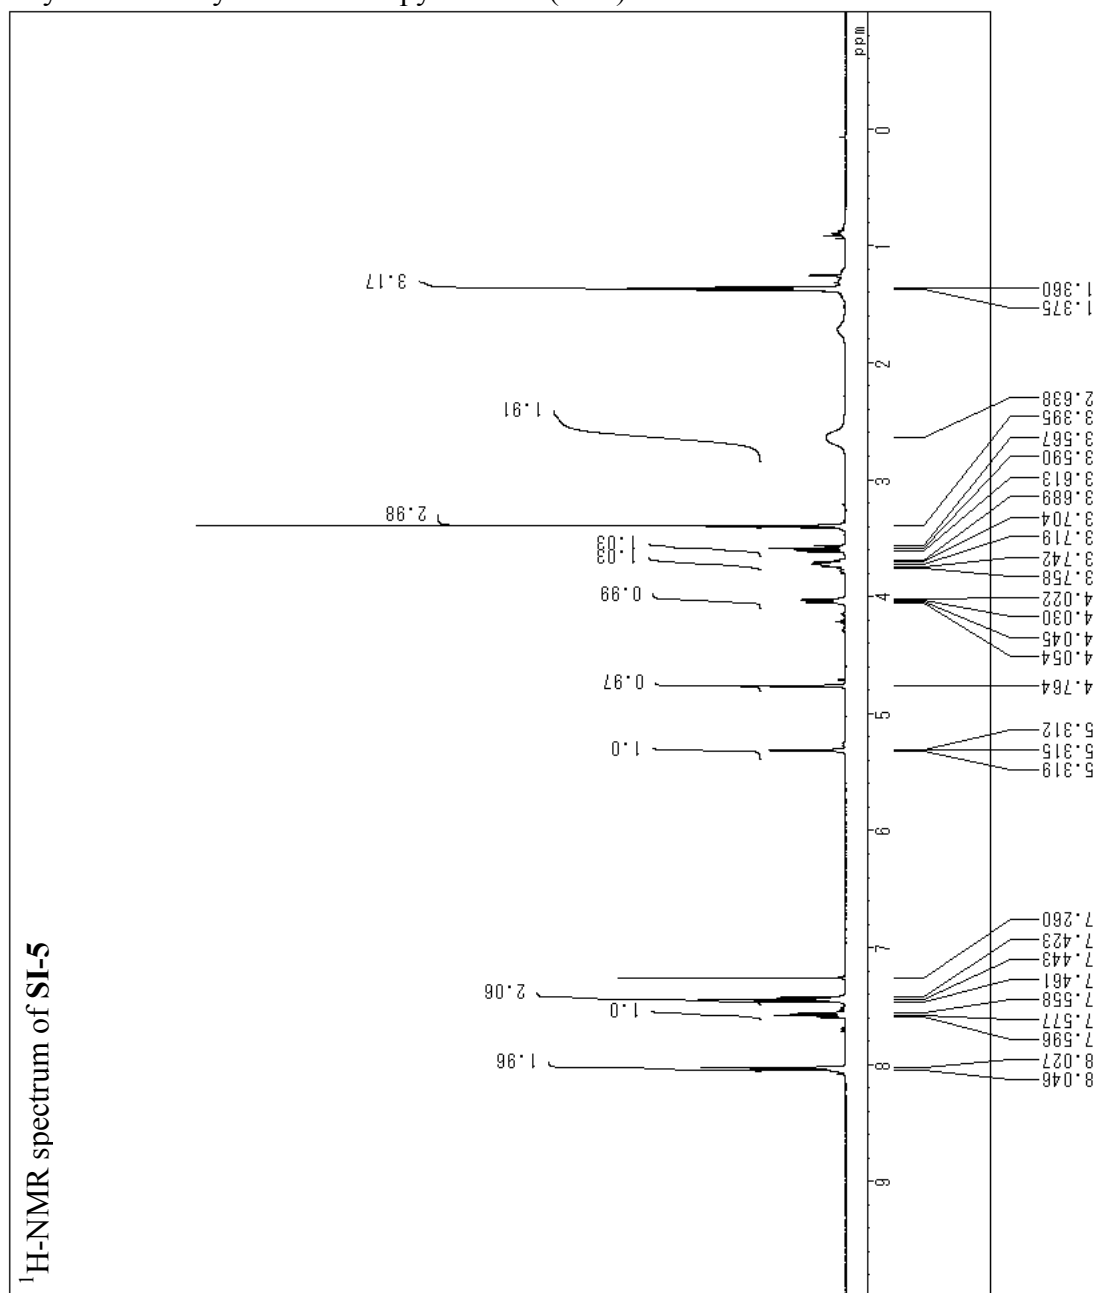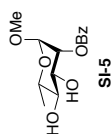

Comment TSV25018\_pure\_2\_20181228  
 Date\_01 2018/Dec/28  
 ObsNuc <sup>1</sup>H  
 ExMode PROTON\_001  
 ObsFreq 400.27 MHz  
 Scan 16  
 AcqTime 2.5559 s  
 Acc. Interval 3.5559 s  
 Spinning 16.0 Hz  
 Temperature 25.0 °C  
 Solvent cdcl<sub>3</sub>

$^1\text{H}$ - $^1\text{H}$  COSY spectrum of **SI-5**

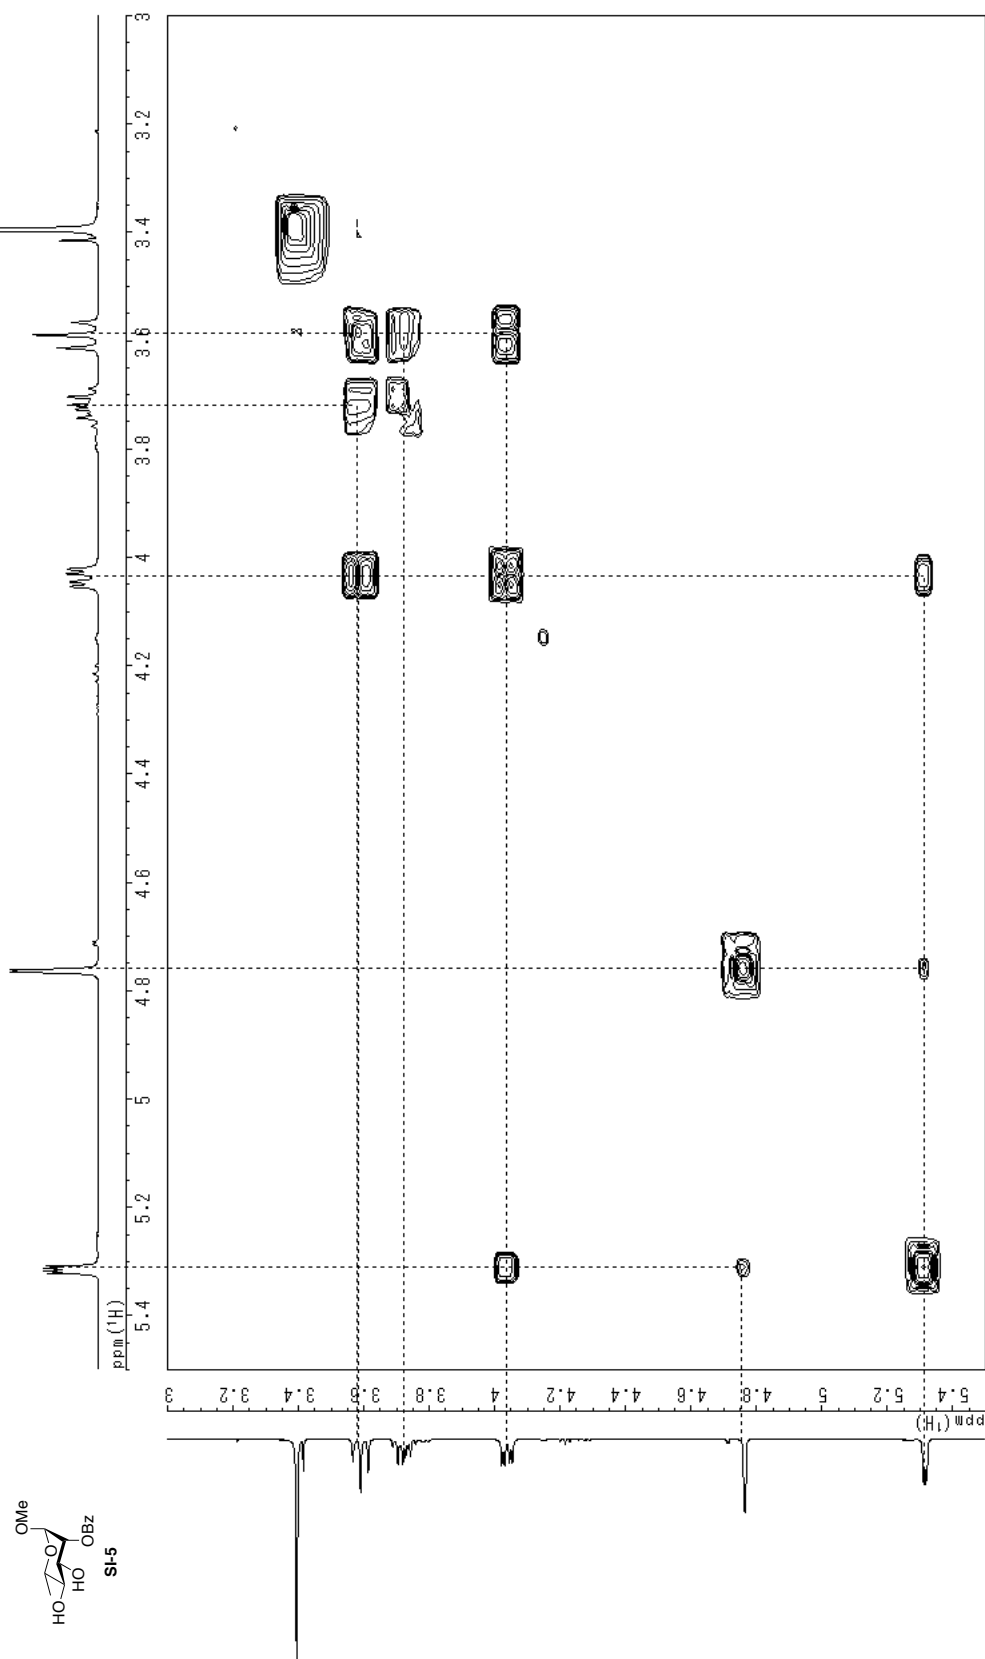

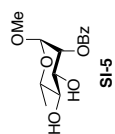

# <sup>13</sup>C-NMR spectrum of SI-5

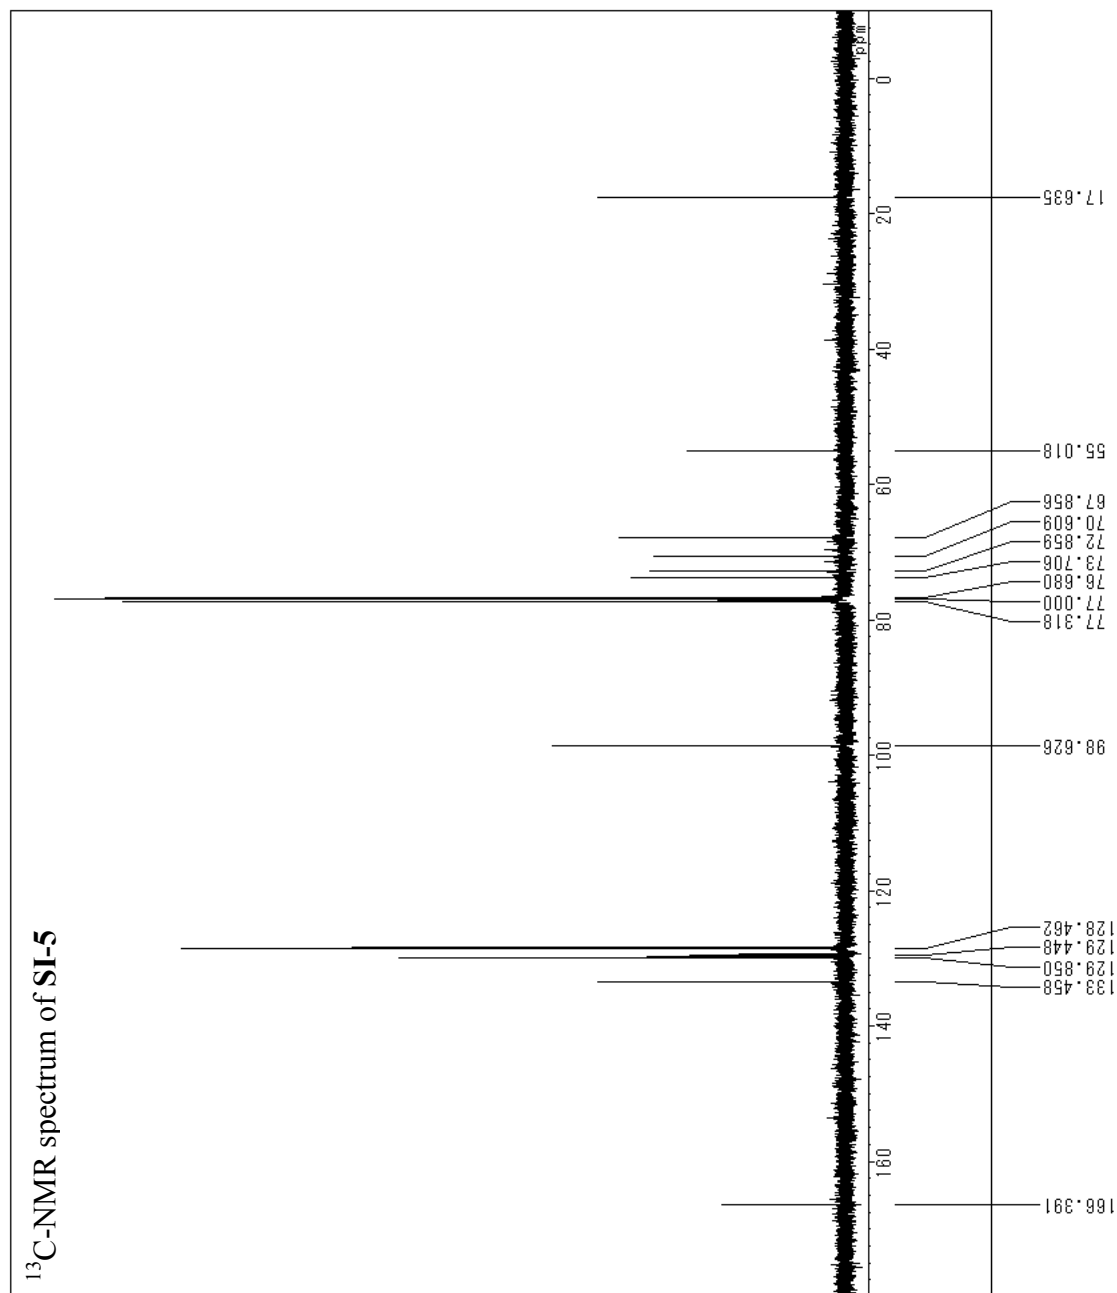

Comment TSV25018\_pure\_2\_13C\_COSY  
 Date\_20181228\_01  
 Date 2018/Dec/28  
 ObsNuc <sup>13</sup>C  
 ExMode CARBON\_001  
 ObsFreq 100.45 MHz  
 Scan 512  
 AcqTime 1.3631 s  
 Acc. Interval 3.3631 s  
 Spinning 20.0 Hz  
 Temperature 25.0 °C  
 Solvent cdcl<sub>3</sub>

Methyl 3-*O*-benzoyl- $\beta$ -D-arabinopyranoside (**3i**)

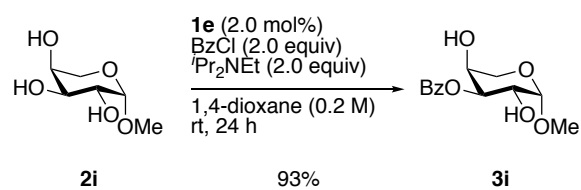

$^1\text{H-NMR}$  spectrum (crude reaction mixture in the presence of catalyst **1e**)

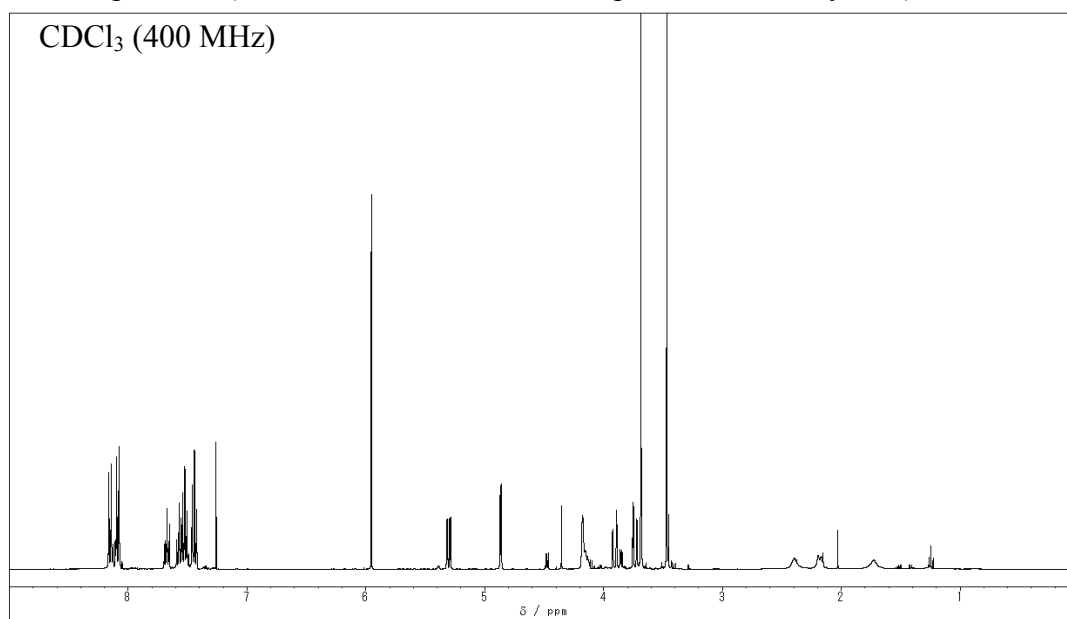

$^1\text{H-NMR}$  spectrum (crude reaction mixture in the absence of catalyst **1e**)

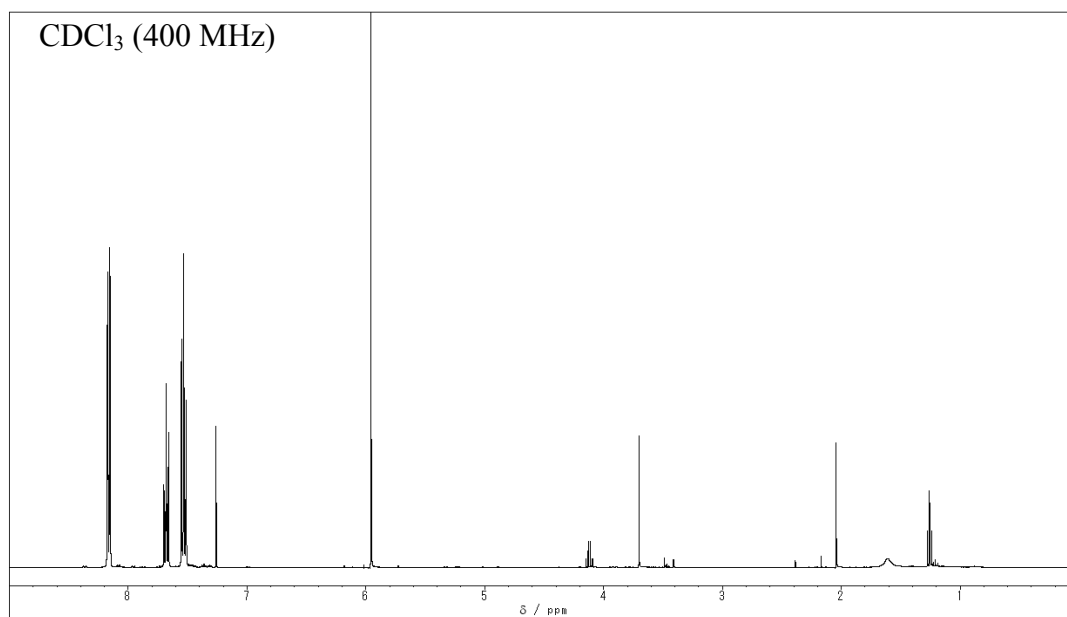

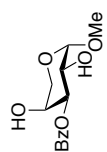

3i

# <sup>1</sup>H-NMR spectrum of 3i

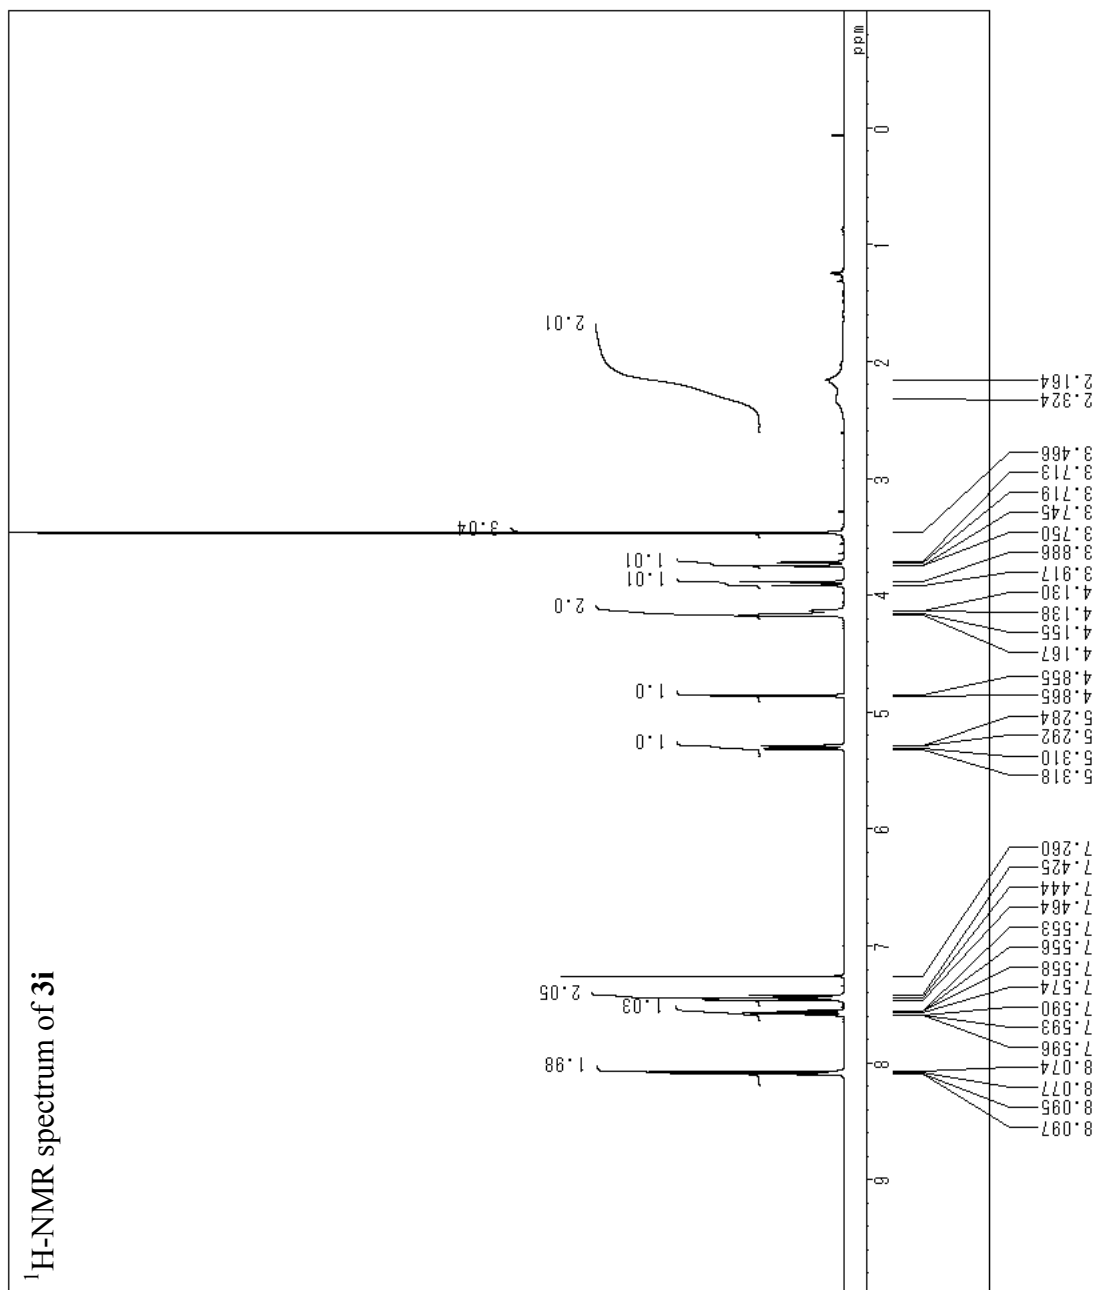

Comment TSV04038\_column\_20180208  
 Date\_01 2016/Feb/05  
 ObsNuc <sup>1</sup>H  
 ExMode PROTON\_001  
 ObsFreq 399.45 MHz  
 Scan 16  
 AcqTime 2.589 s  
 Acc. Interval 5.589 s  
 Spinning 16.0 Hz  
 Temperature 25.0 °C  
 Solvent cdcl3

$^1\text{H}$ - $^1\text{H}$  COSY spectrum of **3i**

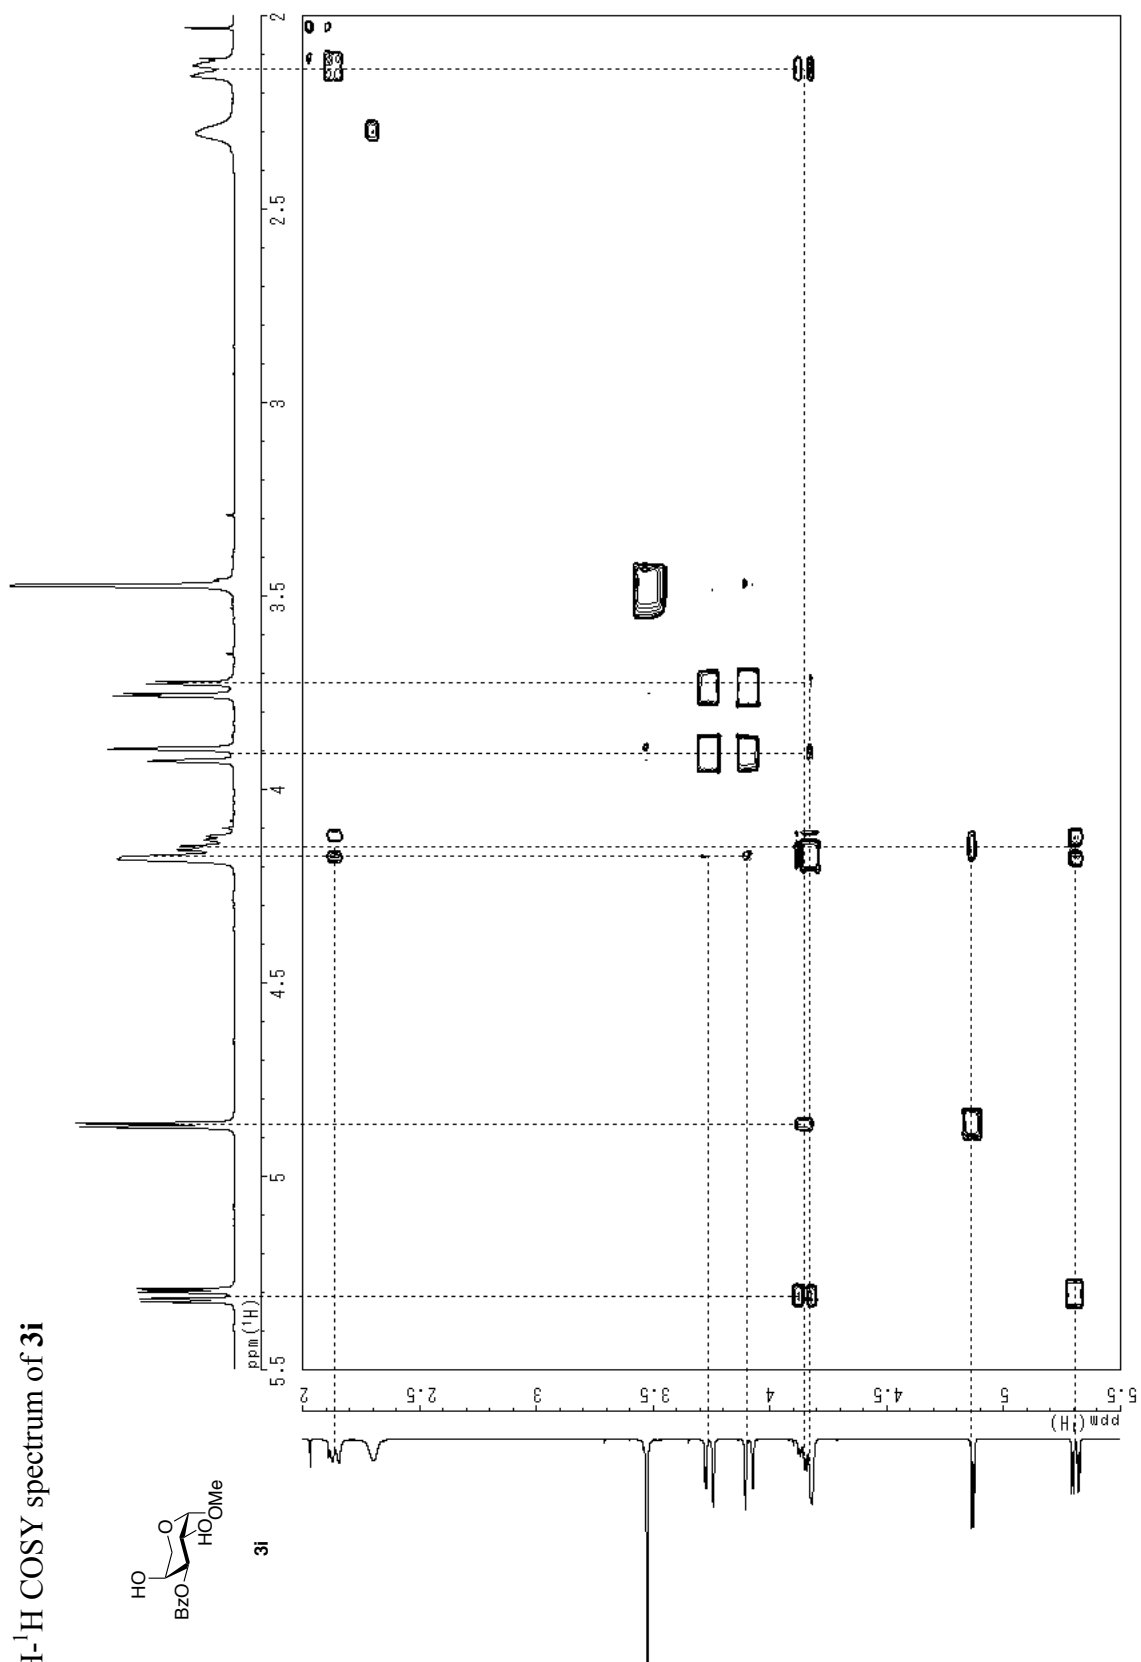

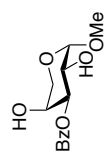

3i

# <sup>13</sup>C-NMR spectrum of 3i

Comment TSV04038.13C.20180205\_01  
 Date 2016/Feb/05  
 ObsNuc <sup>13</sup>C  
 ExMode CARBON\_001  
 ObsFreq 100.45 MHz  
 Scan 512  
 AcqTime 1.3831 s  
 Acc. Interval 3.3831 s  
 Spinning 20.0 Hz  
 Temperature 25.0 °C  
 Solvent cdcl<sub>3</sub>

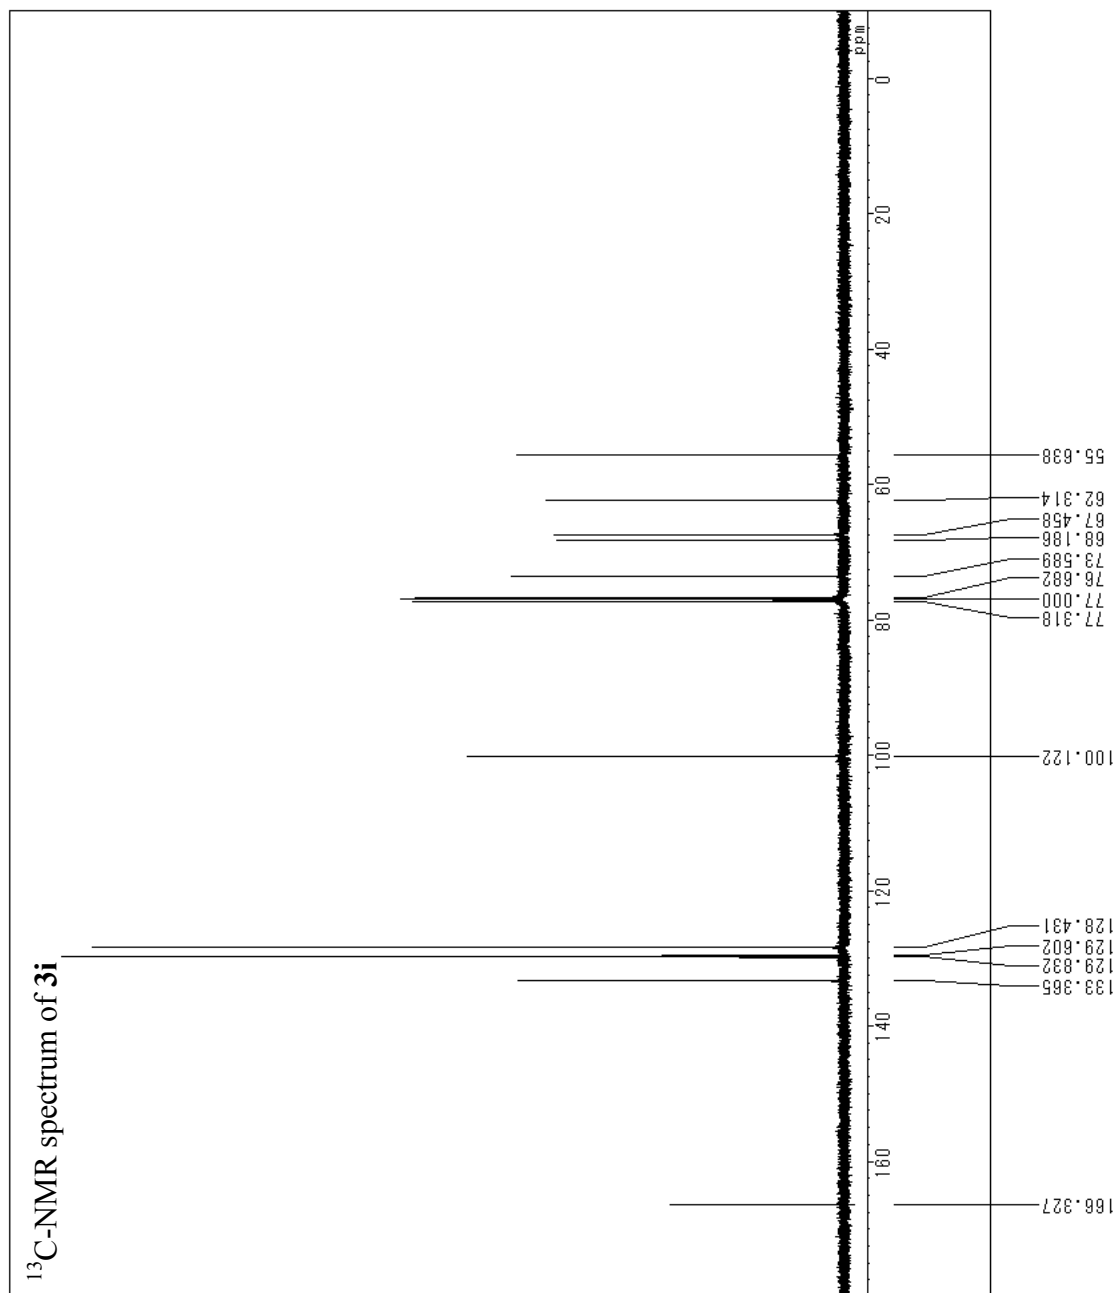

Methyl 4-*O*-benzoyl- $\beta$ -L-arabinopyranoside (SI-6)

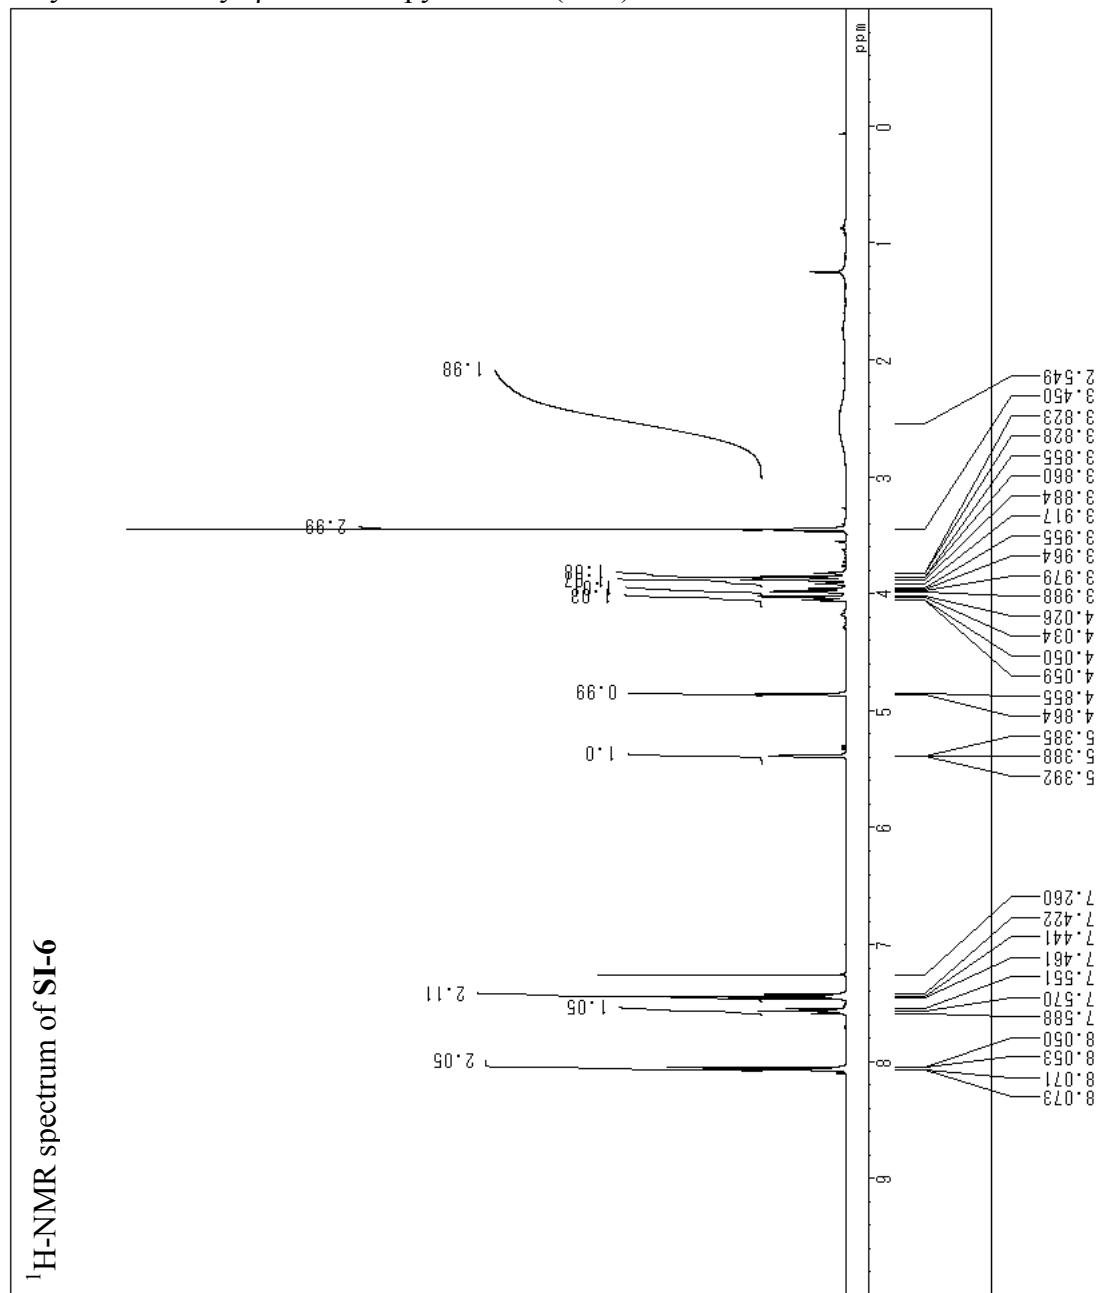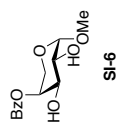

Comment: TSV25020\_pure\_13C\_COSY\_2  
 0181227\_01  
 Date: 2018/Dec/27  
 ObsNuc: <sup>1</sup>H  
 ExMode: PROTON\_001  
 ObsFreq: 399.45 MHz  
 Scan: 16  
 AcqTime: 2.569 s  
 Acc. Interval: 5.589 s  
 Spinning: 16.0 Hz  
 Temperature: 25.0 °C  
 Solvent: cdcl<sub>3</sub>



$^1\text{H}$ - $^1\text{H}$  COSY spectrum of **SI-6**

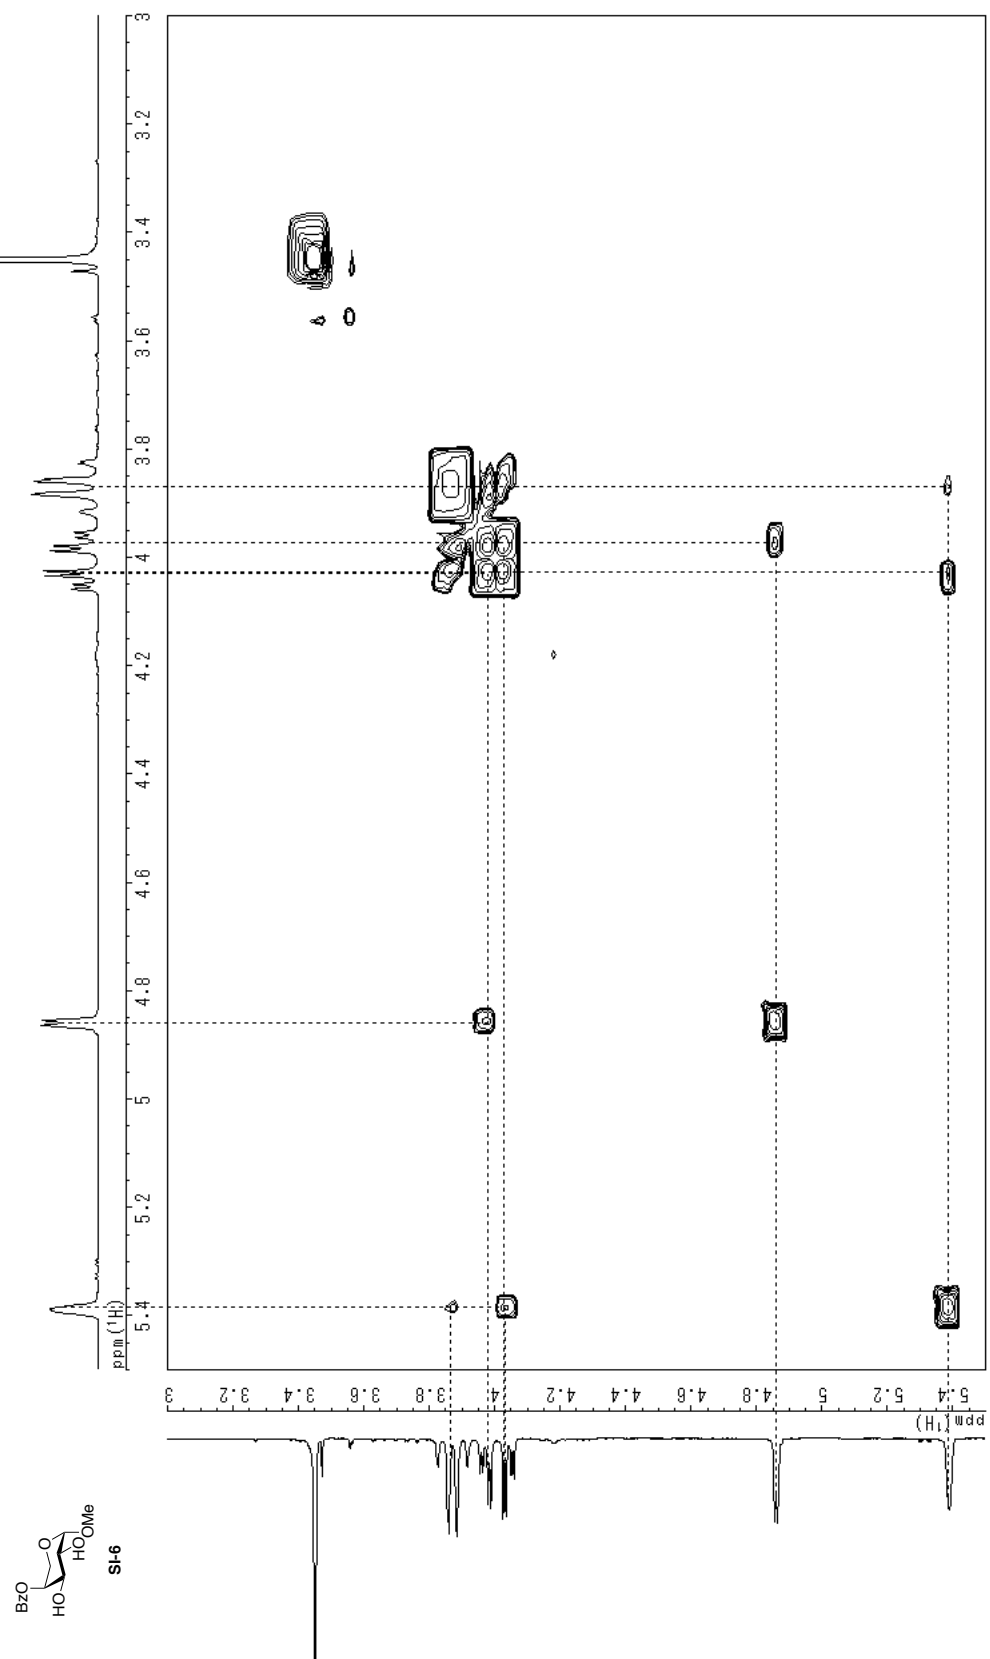

<sup>13</sup>C-NMR spectrum of **SI-6**

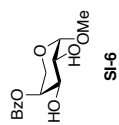

Comment TSV25020\_pure\_13C\_COSY\_2  
 0181227\_01 2018/Dec/27  
 Date  
 ObsNuc <sup>13</sup>C  
 ExMode CARBON\_001  
 ObsFreq 100.45 MHz  
 Scan 512  
 AcqTime 1.3831 s  
 Acc. Interval 3.3831 s  
 Spinning 20.0 Hz  
 Temperature 25.0 °C  
 Solvent cdcl<sub>3</sub>

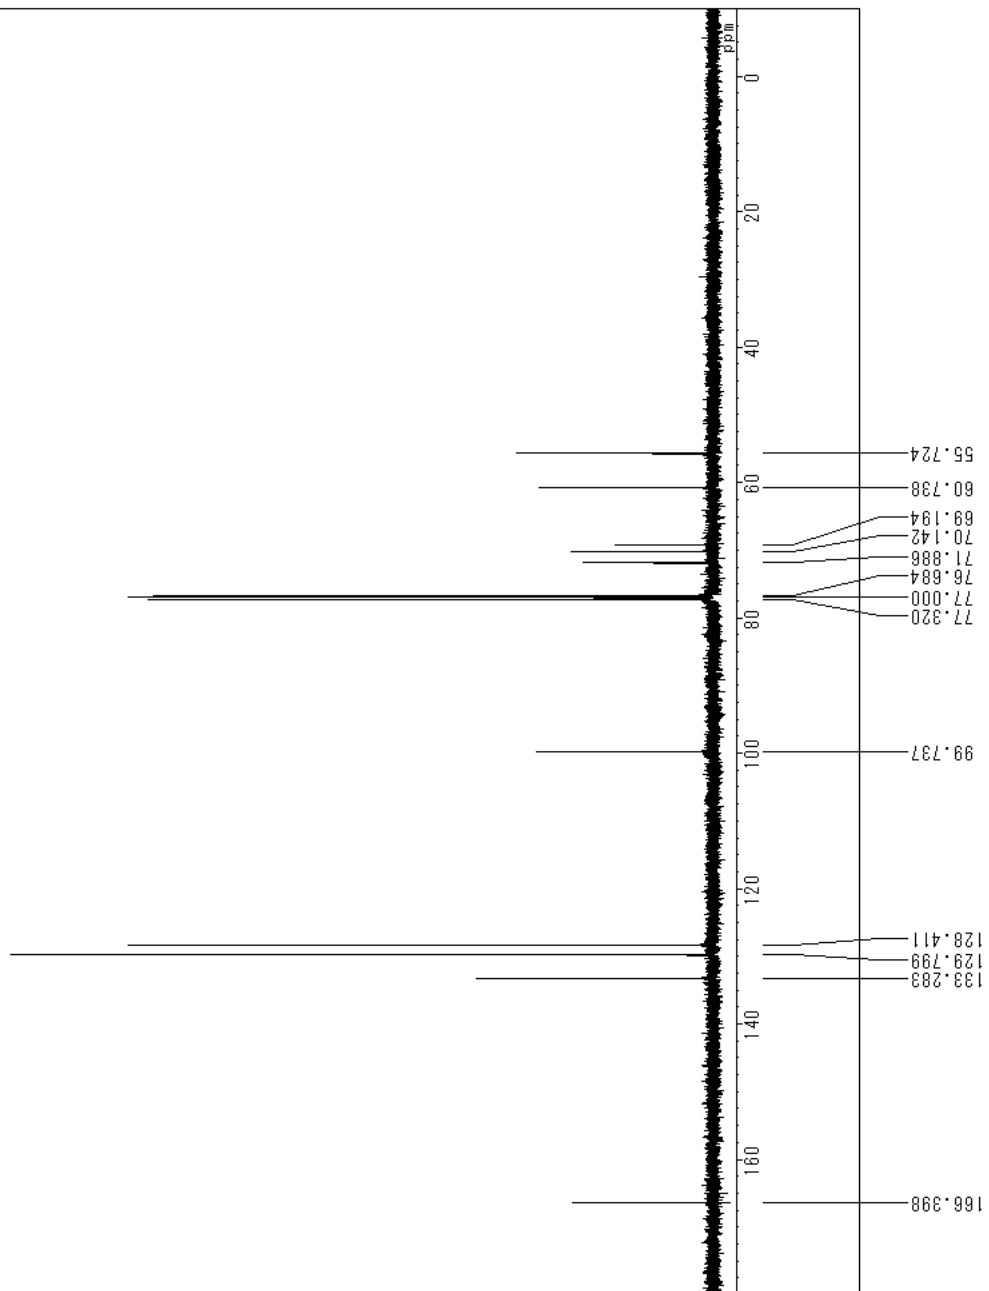

6-((*tert*-butyldimethylsilyl)oxy)-3-*O*-benzoyl-D-galactal (**3j**)

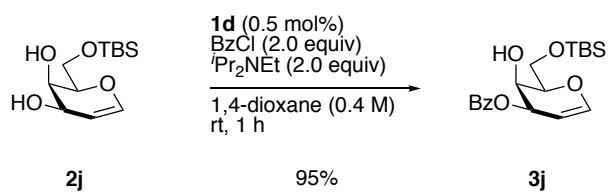

$^1\text{H}$ -NMR spectrum (crude reaction mixture in the presence of catalyst **1d**)

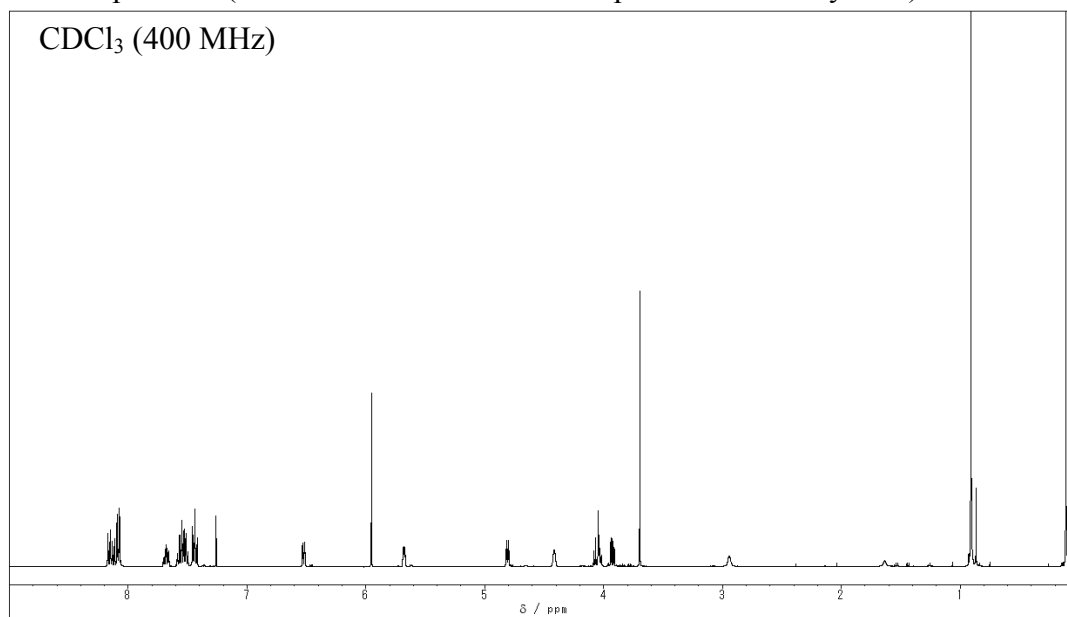

$^1\text{H}$ -NMR spectrum (crude reaction mixture in the absence of catalyst **1d**)

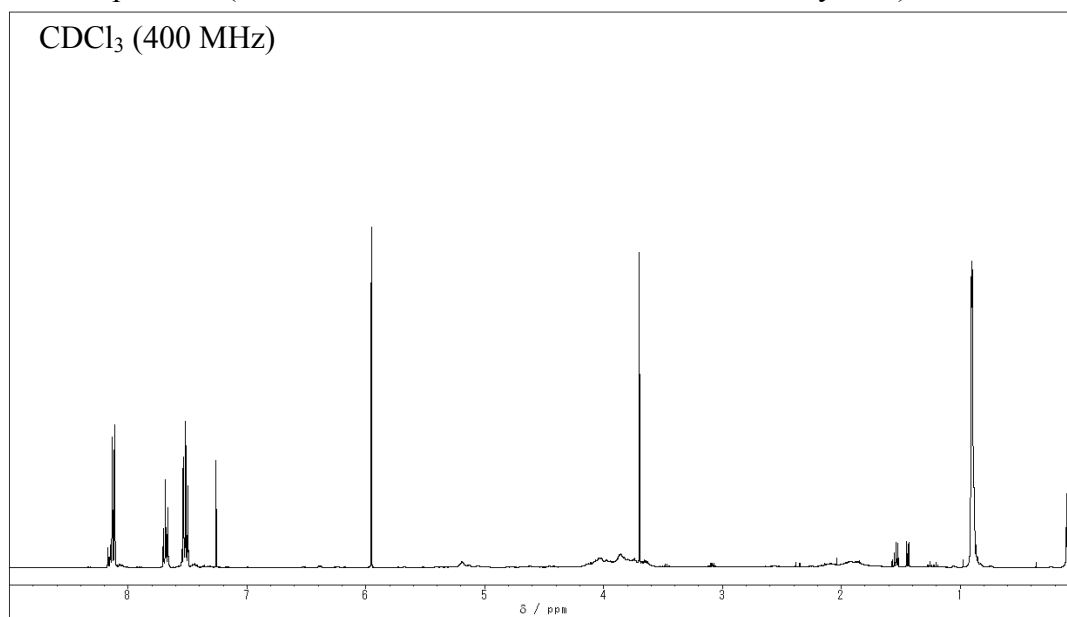

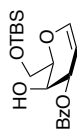

3j

<sup>1</sup>H-NMR spectrum of 3j

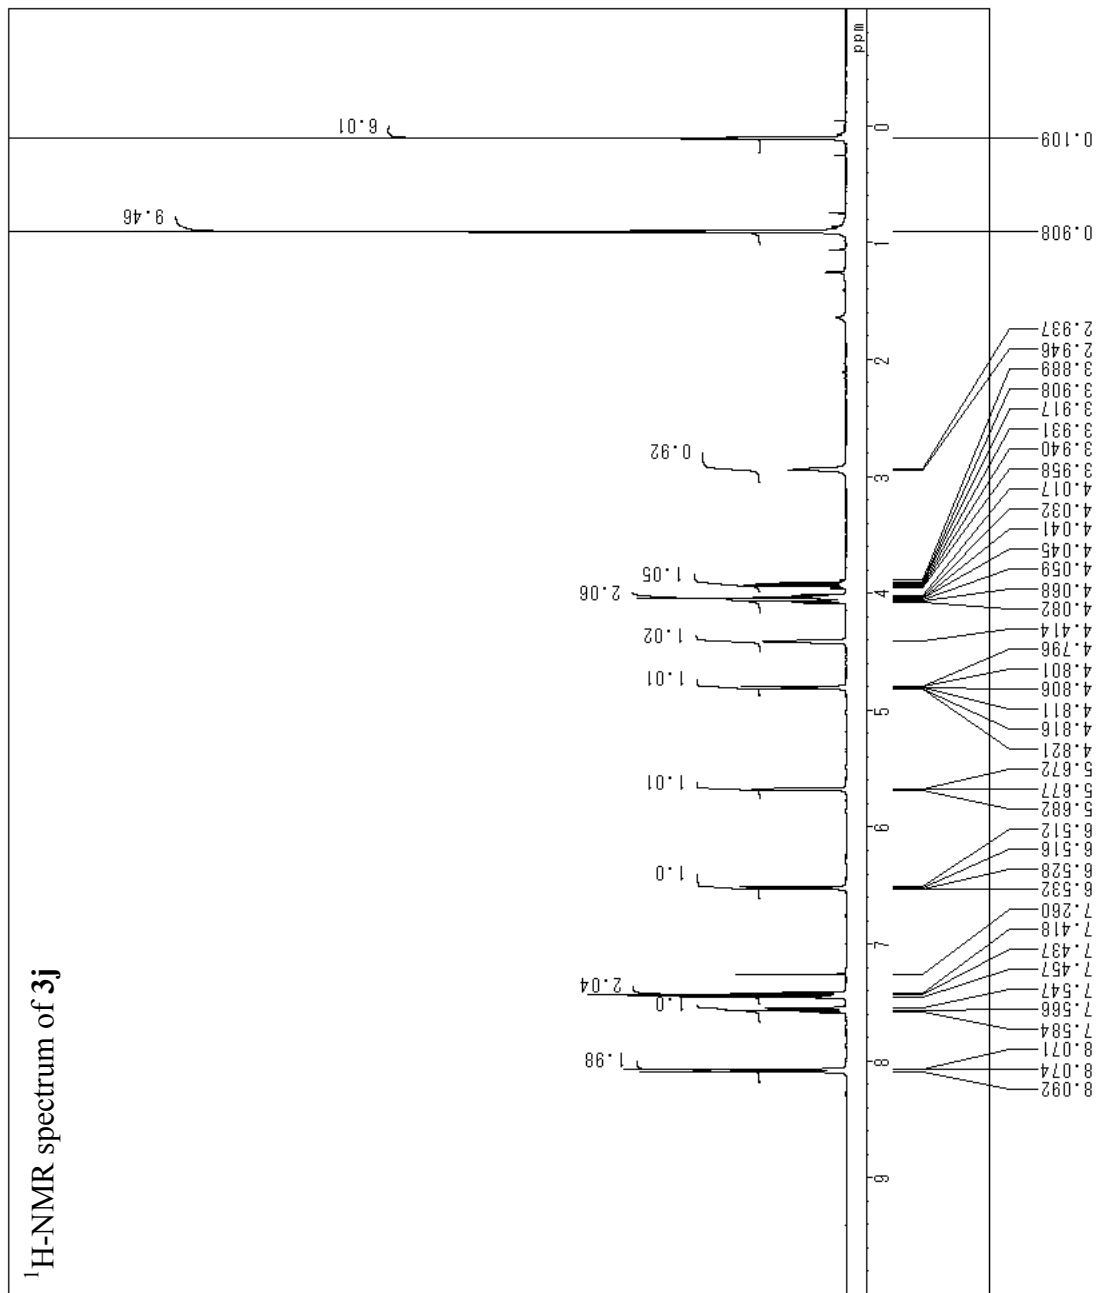

Comment TSV21017\_pure\_13C\_COSY\_2  
0180131\_01  
Date 2018/Jan/31  
ObsNuc <sup>1</sup>H  
ExMode PROTON\_001  
ObsFreq 399.45 MHz  
Scan 16  
AcqTime 2.589 s  
Acc. Interval 5.589 s  
Spinning 16.0 Hz  
Temperature 25.0 °C  
Solvent cdcl3

$^1\text{H}$ - $^1\text{H}$  COSY spectrum of **3j**

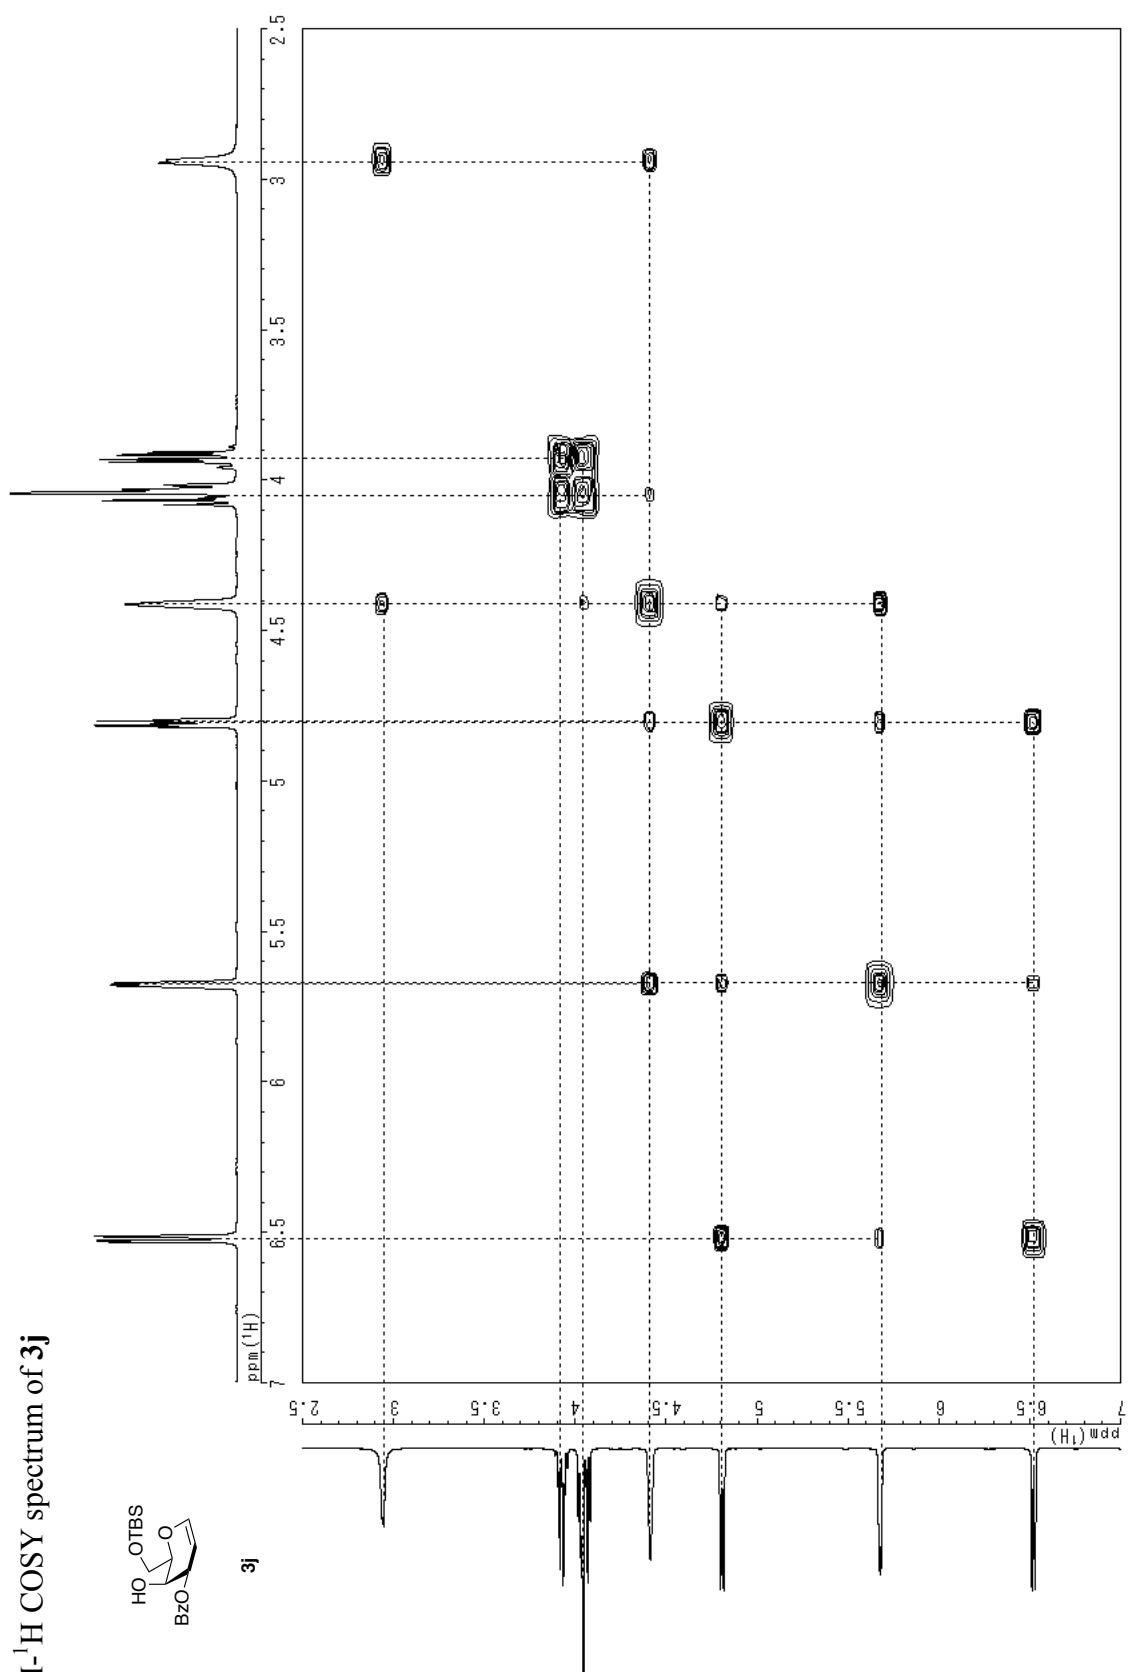

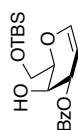

3j

# <sup>13</sup>C-NMR spectrum of 3j

Comment TSV21017\_pure\_13C\_COSY\_2  
 0180131\_01  
 Date 2018/Jan/31  
 ObsNuc <sup>13</sup>C  
 ExMode CARBON\_001  
 ObsFreq 100.45 MHz  
 Scan 512  
 AcqTime 1.3831 s  
 Acc. Interval 3.3831 s  
 Spinning 20.0 Hz  
 Temperature 25.0 °C  
 Solvent cdcl<sub>3</sub>

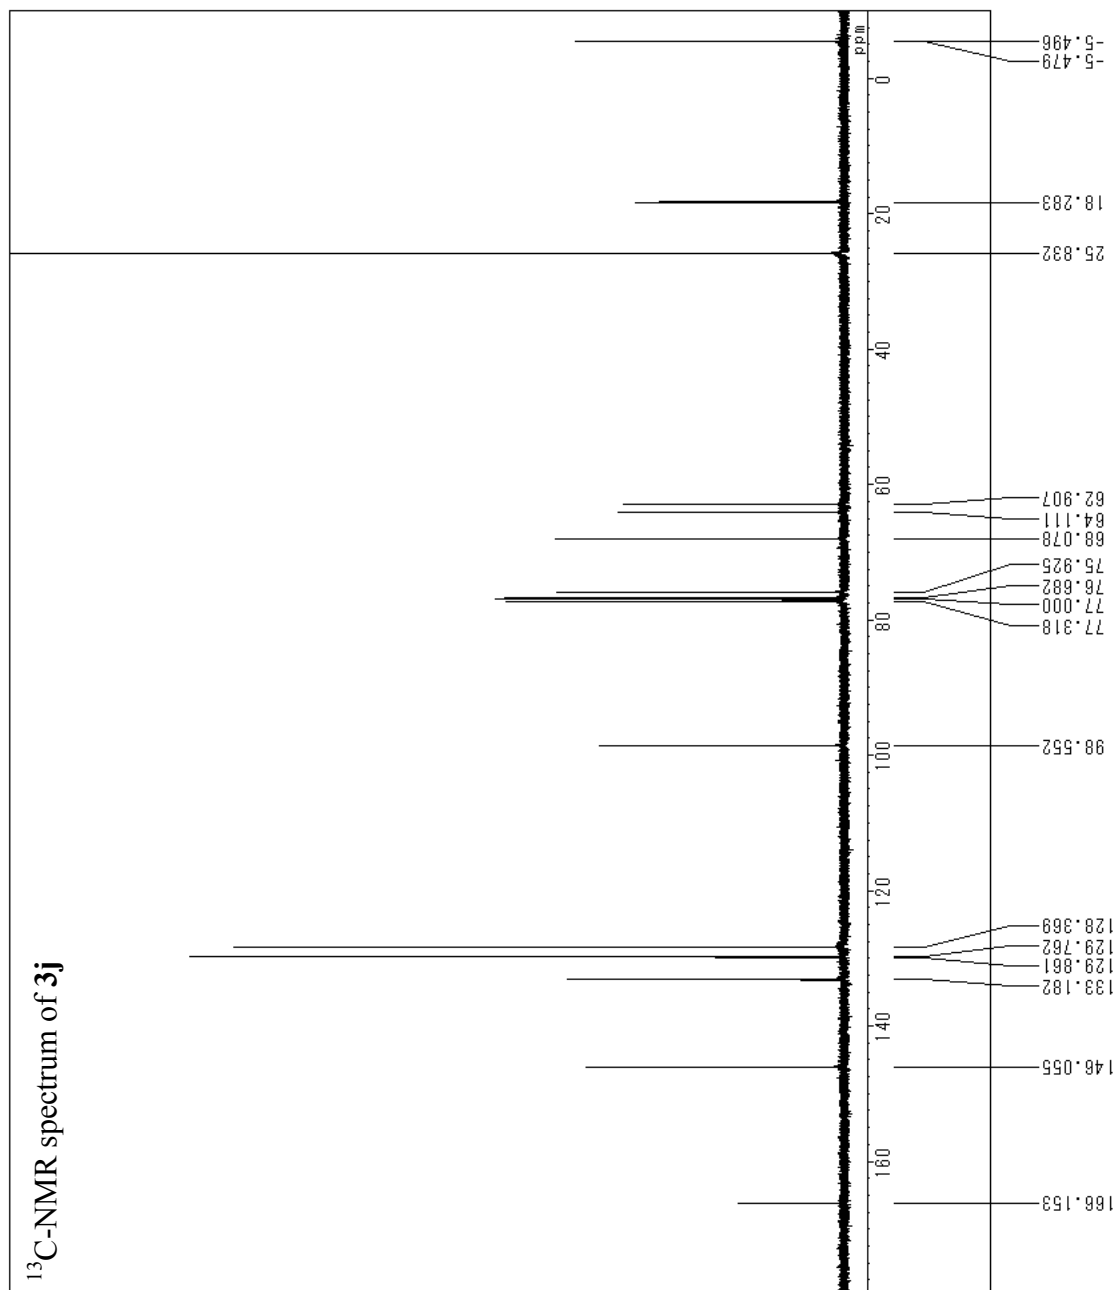

Methyl 3-*O*-4-methoxybenzoyl- $\alpha$ -L-fucopyranoside (**3k**)

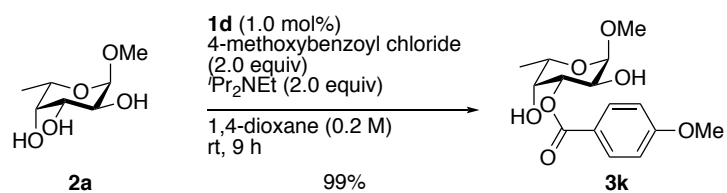

$^1\text{H-NMR}$  spectrum (crude reaction mixture in the presence of catalyst **1d**)

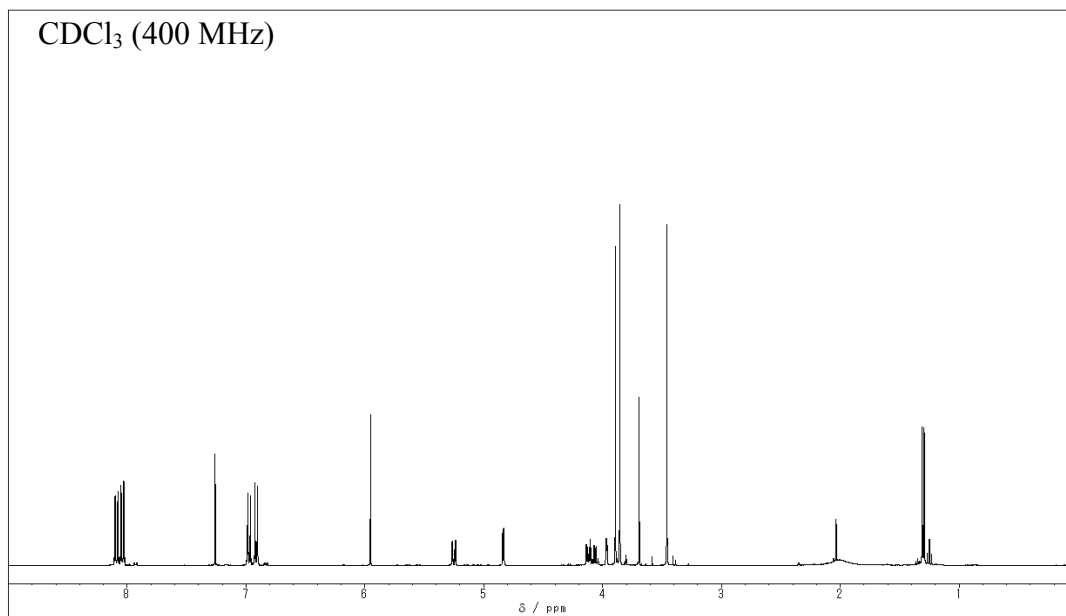

$^1\text{H-NMR}$  spectrum (crude reaction mixture in the absence of catalyst **1d**)

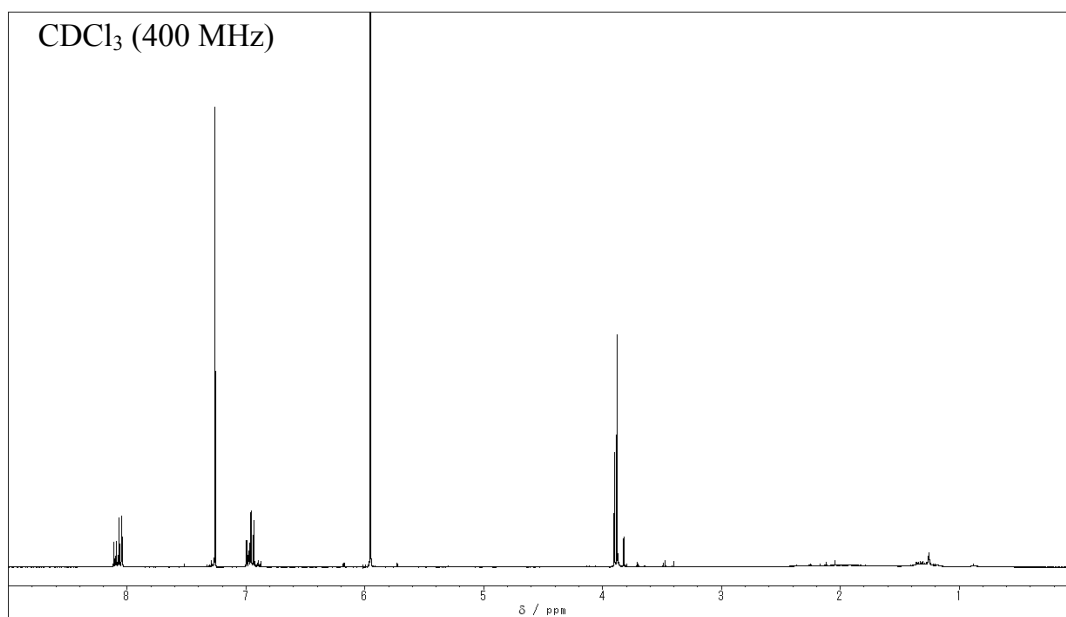

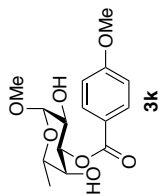

<sup>1</sup>H-NMR spectrum of **3k**

Comment TSV17037\_pure\_13C\_COSY\_2  
 0170920\_01  
 Date 2017/Sep/20  
 ObsNuc <sup>1</sup>H  
 ExMode PROTON\_001  
 ObsFreq 399.45 MHz  
 Scan 16  
 AcqTime 2.589 s  
 Acc. Interval 5.589 s  
 Spinning 18.0 Hz  
 Temperature 25.0 °C  
 Solvent cdcl<sub>3</sub>

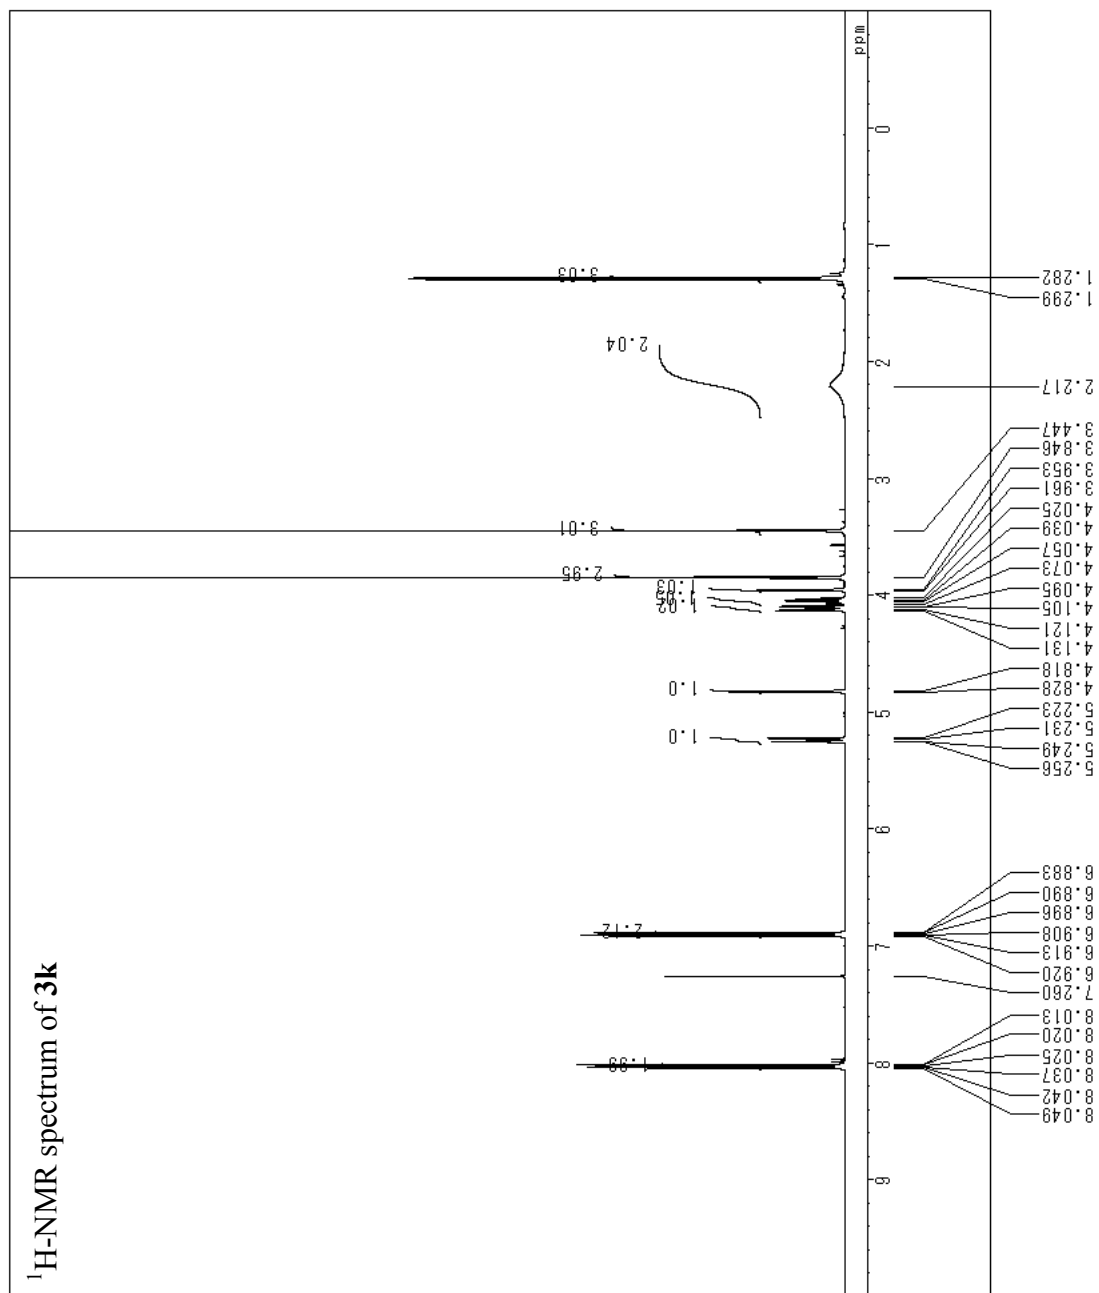



$^1\text{H}$ - $^1\text{H}$  COSY spectrum of **3k**

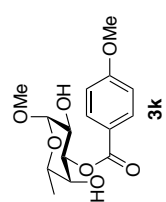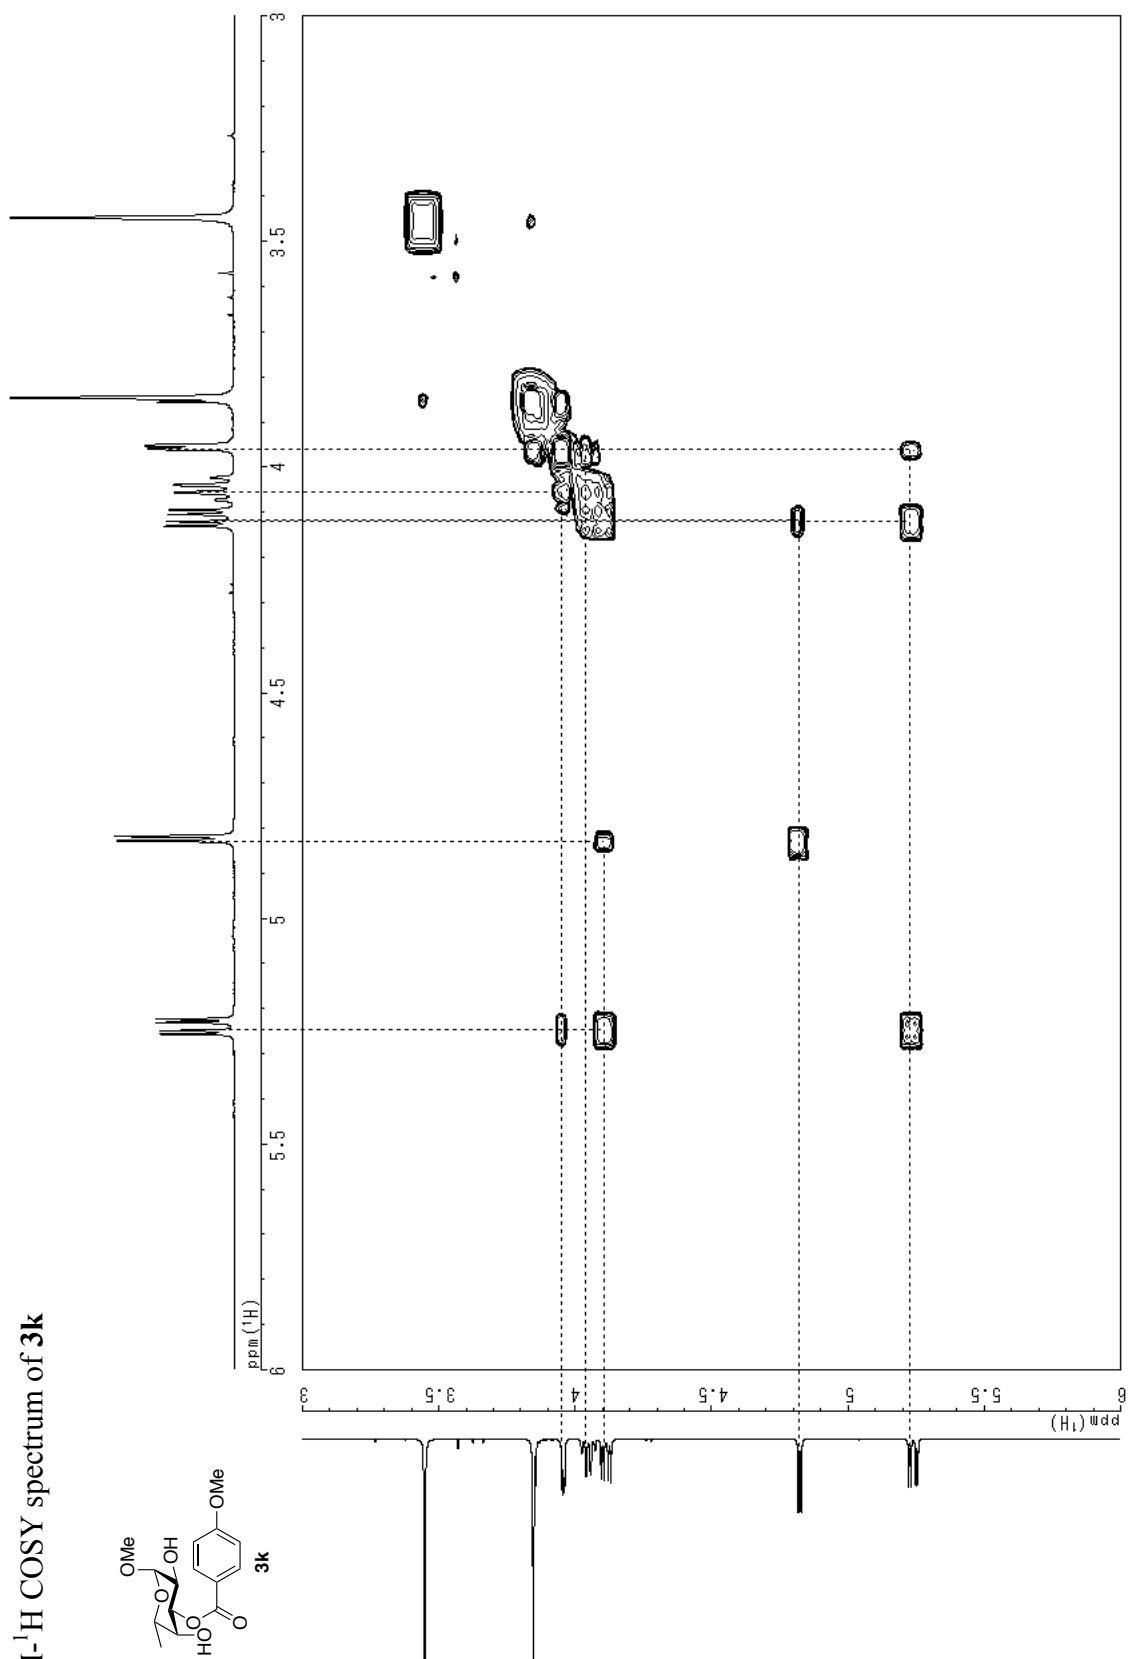

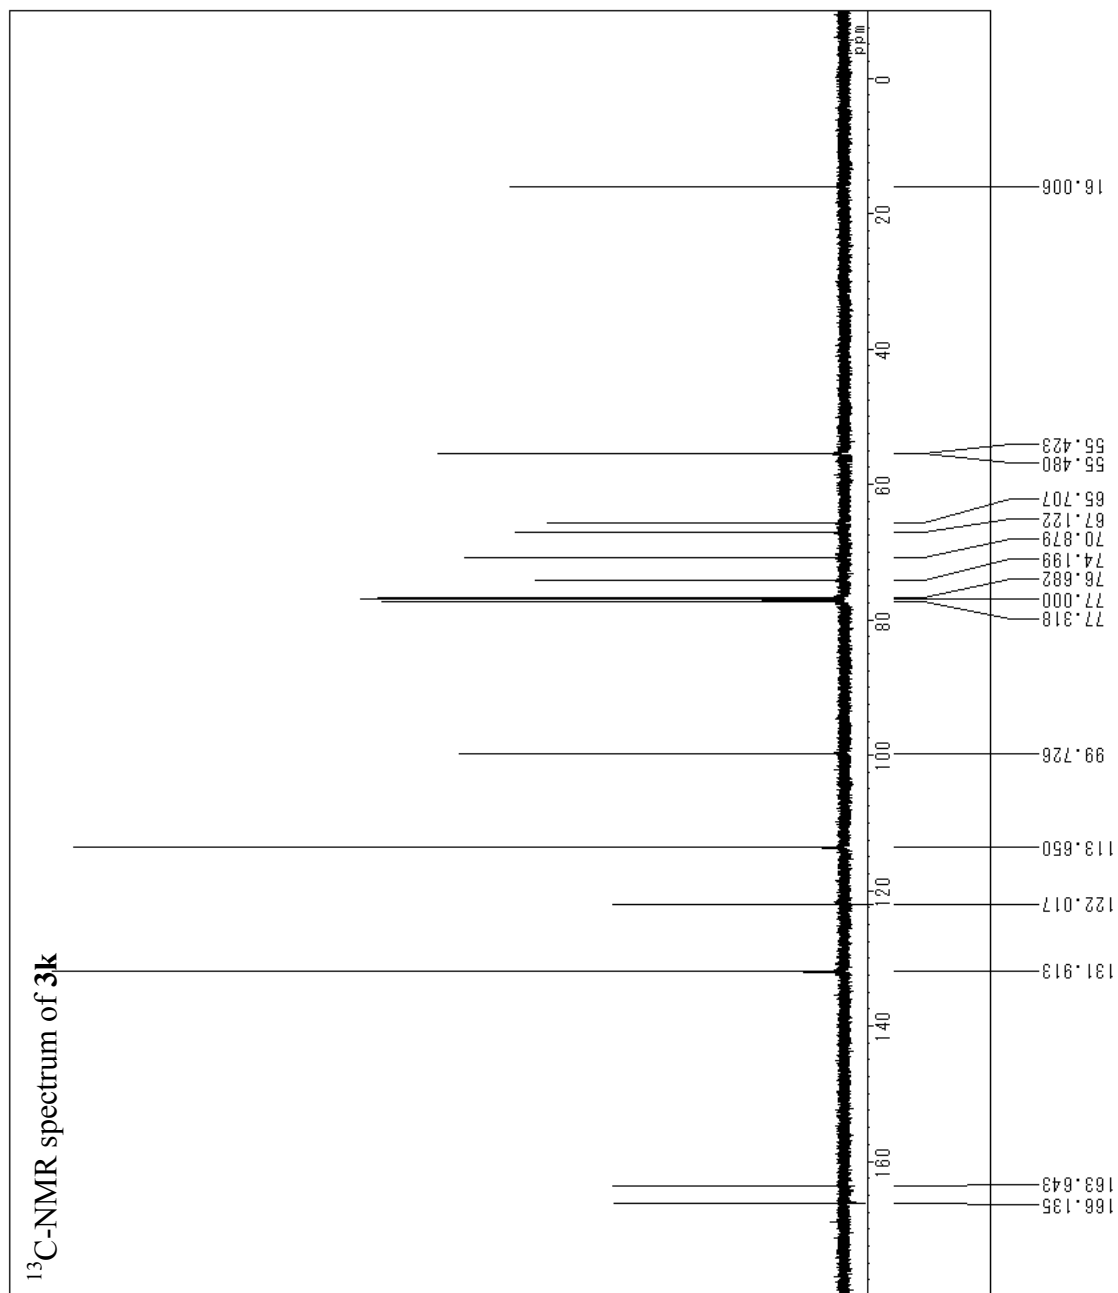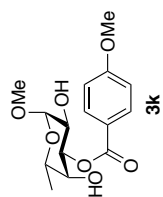

Comment TSV17037\_13C\_20170920\_01  
 Date 2017/Sep/20  
 ObsNuc <sup>13</sup>C  
 ExMode CARBON\_001  
 ObsFreq 100.45 MHz  
 Scan 512  
 AcqTime 1.3831 s  
 Acc. Interval 3.3831 s  
 Spinning 20.0 Hz  
 Temperature 25.0 °C  
 Solvent cdcl<sub>3</sub>

Methyl 3-*O*-4-methylbenzoyl - $\alpha$ -L-fucopyranoside (**3I**)

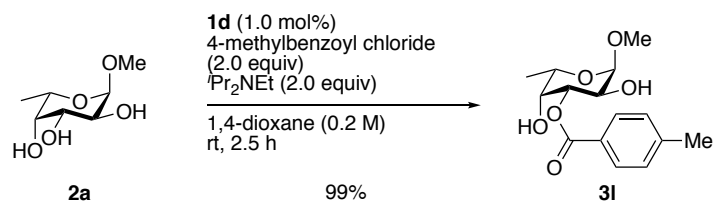

$^1\text{H}$ -NMR spectrum (crude reaction mixture in the presence of catalyst **1d**)

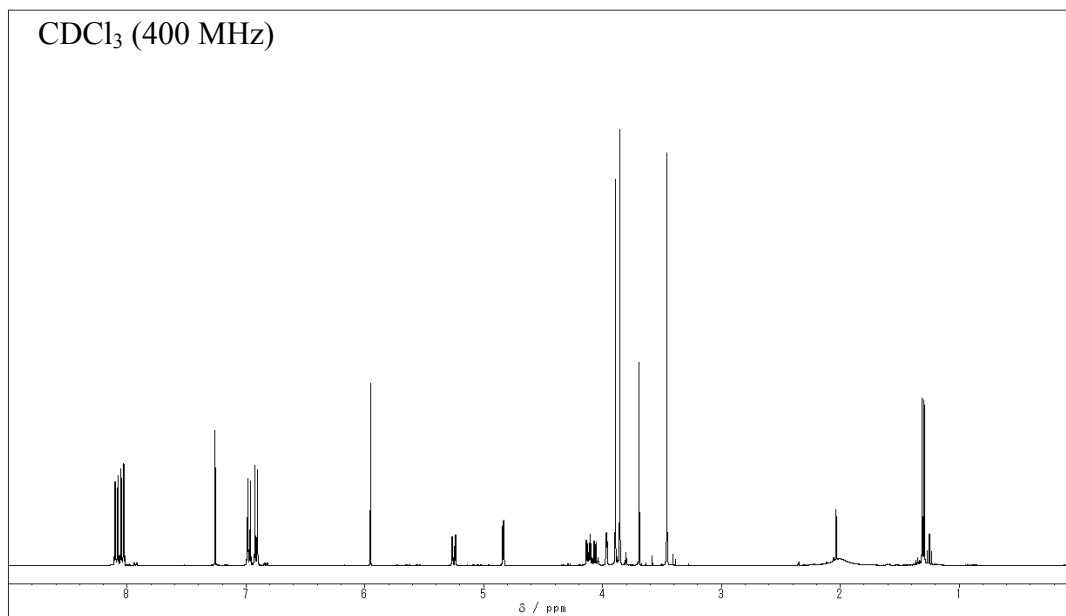

$^1\text{H}$ -NMR spectrum (crude reaction mixture in the absence of catalyst **1d**)



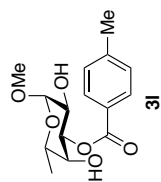

<sup>1</sup>H-NMR spectrum of **31**

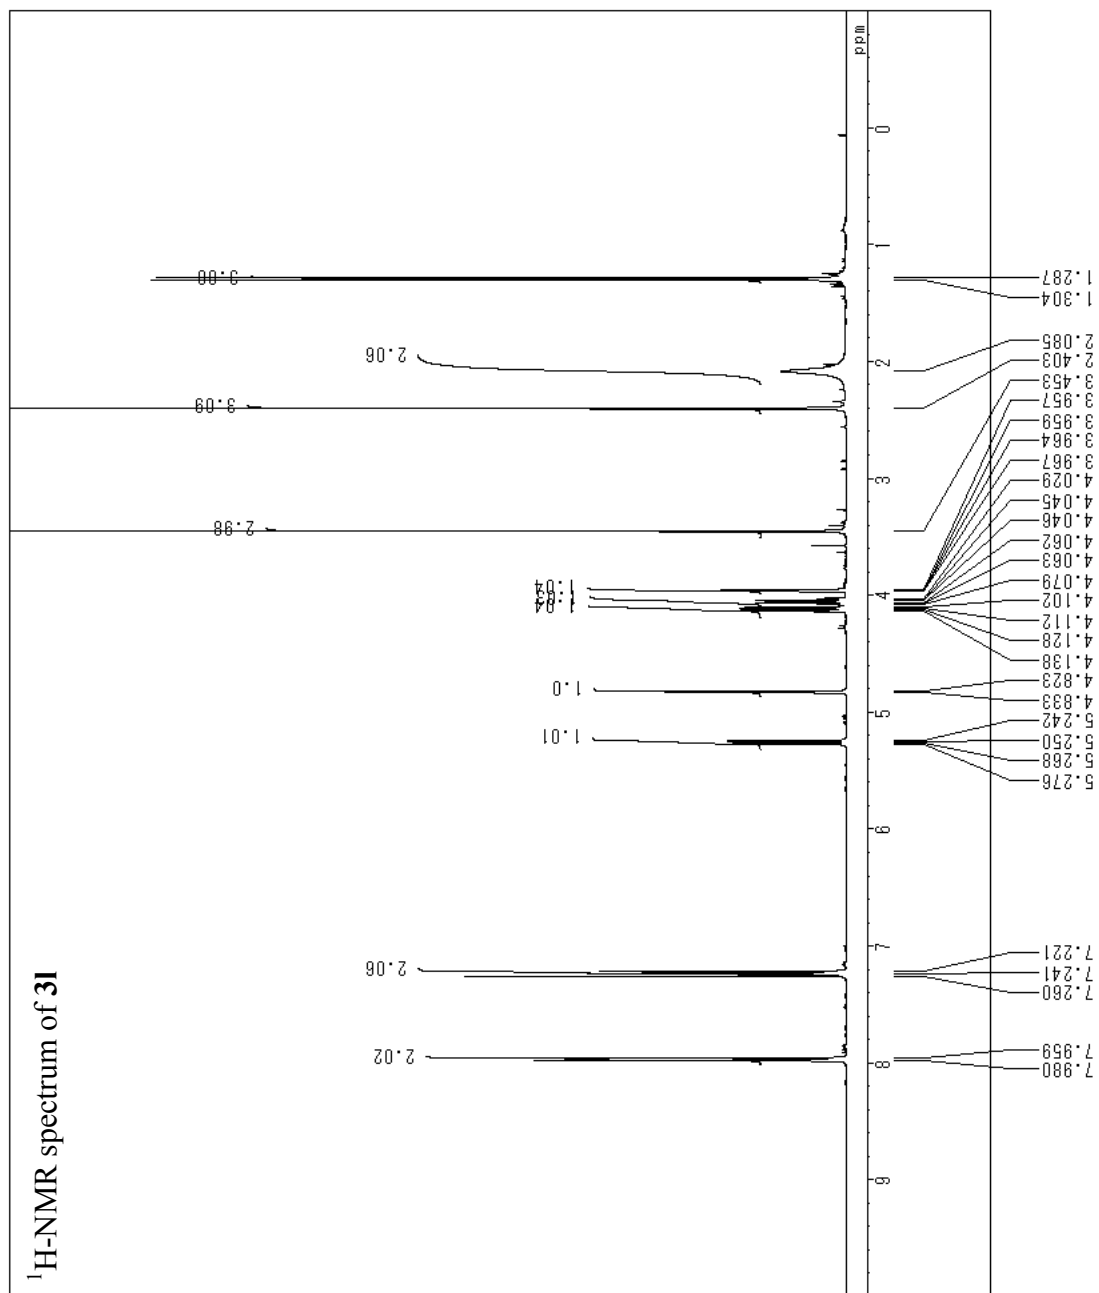

Comment TSV18037\_pure\_13C\_COSY\_2  
 0171011\_01  
 Date 2017/Oct/11  
 ObsNuc <sup>1</sup>H  
 ExMode PROTON\_001  
 ObsFreq 399.45 MHz  
 Scan 16  
 AcqTime 2.589 s  
 Acc. Interval 5.589 s  
 Spinning 16.0 Hz  
 Temperature 25.0 °C  
 Solvent cdcl<sub>3</sub>

<sup>1</sup>H COSY spectrum of **31**

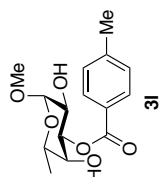

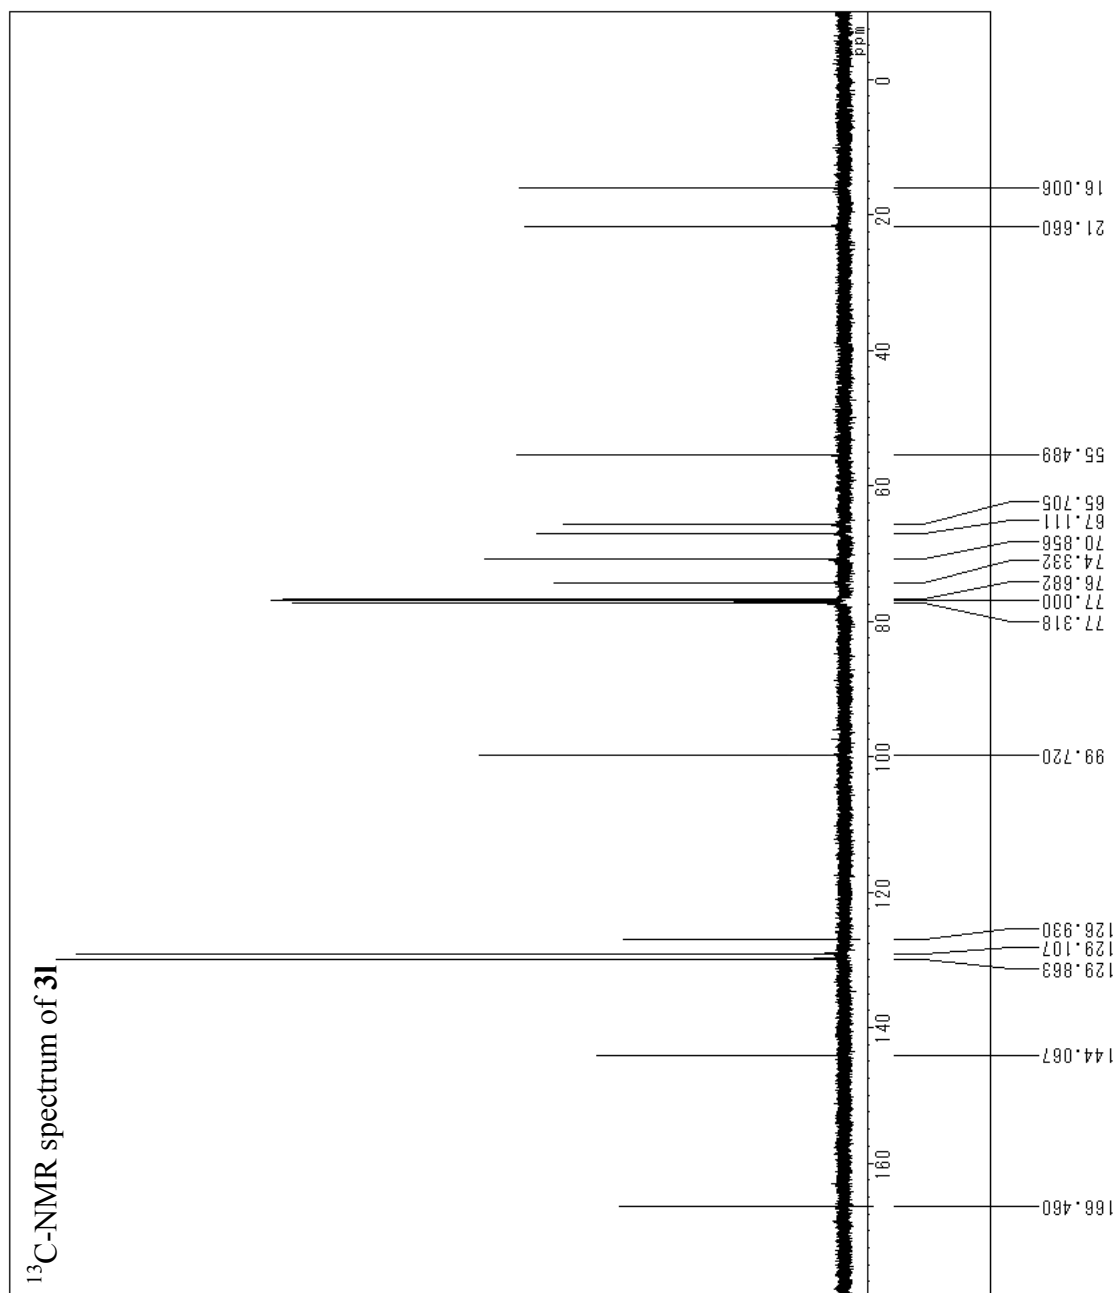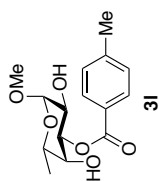

Comment TSV18037\_pure\_13C\_COSY\_2  
 0171011\_01  
 Date 2017/Oct/11  
 ObsNuc <sup>13</sup>C  
 ExMode CARBON\_001  
 ObsFreq 100.45 MHz  
 Scan 512  
 AcqTime 1.3631 s  
 Acc. Interval 3.3631 s  
 Spinning 20.0 Hz  
 Temperature 25.0 °C  
 Solvent cdcl<sub>3</sub>

Methyl 3-*O*-4-chlorobenzoyl- $\alpha$ -L-fucopyranoside (**3m**)

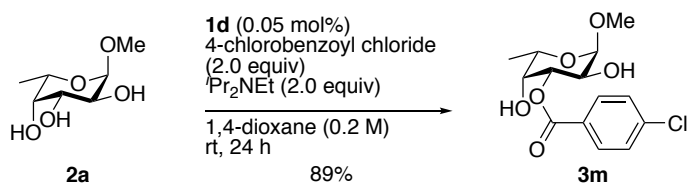

<sup>1</sup>H-NMR spectrum (crude reaction mixture in the presence of catalyst **1d**)

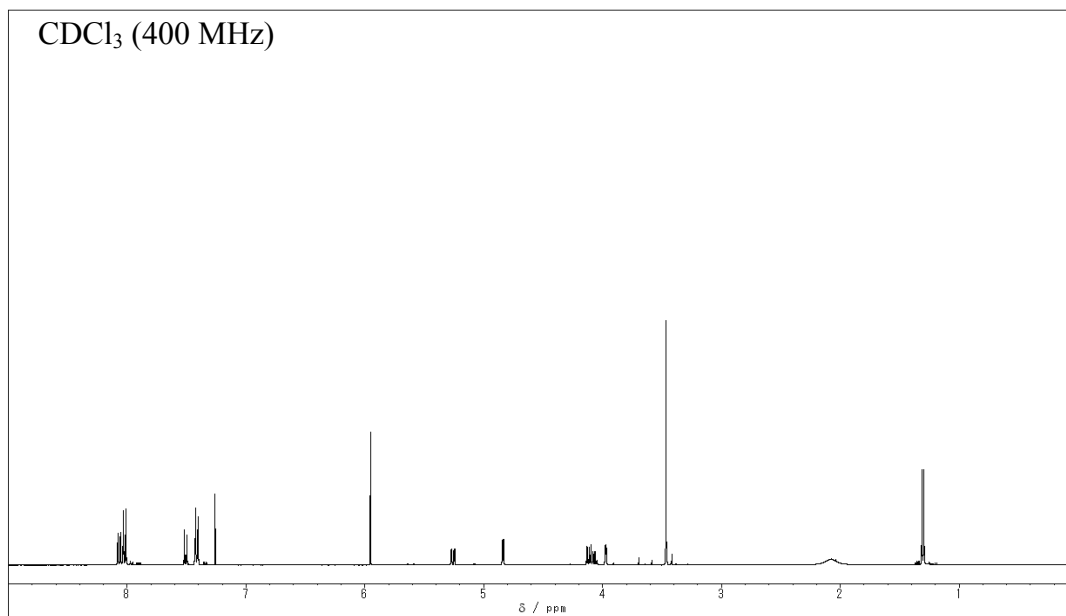

<sup>1</sup>H-NMR spectrum (crude reaction mixture in the absence of catalyst **1d**)

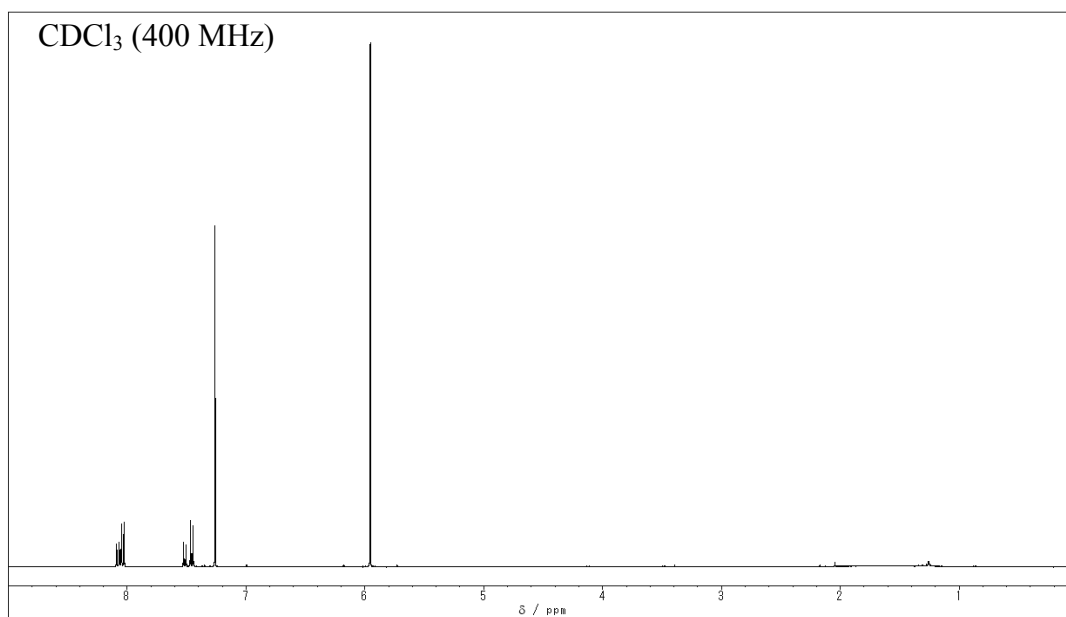

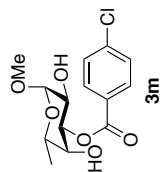

Comment TSV17035\_pure\_13C\_COSY\_2  
 0170918\_01  
 Date 2017/Sep/19  
 ObsNuc <sup>1</sup>H  
 ExMode PROTON\_001  
 ObsFreq 399.45 MHz  
 Scan 8  
 AcqTime 2.589 s  
 Acc. Interval 5.589 s  
 Spinning 18.0 Hz  
 Temperature 25.0 °C  
 Solvent cdcl<sub>3</sub>

<sup>1</sup>H-NMR spectrum of **3m**

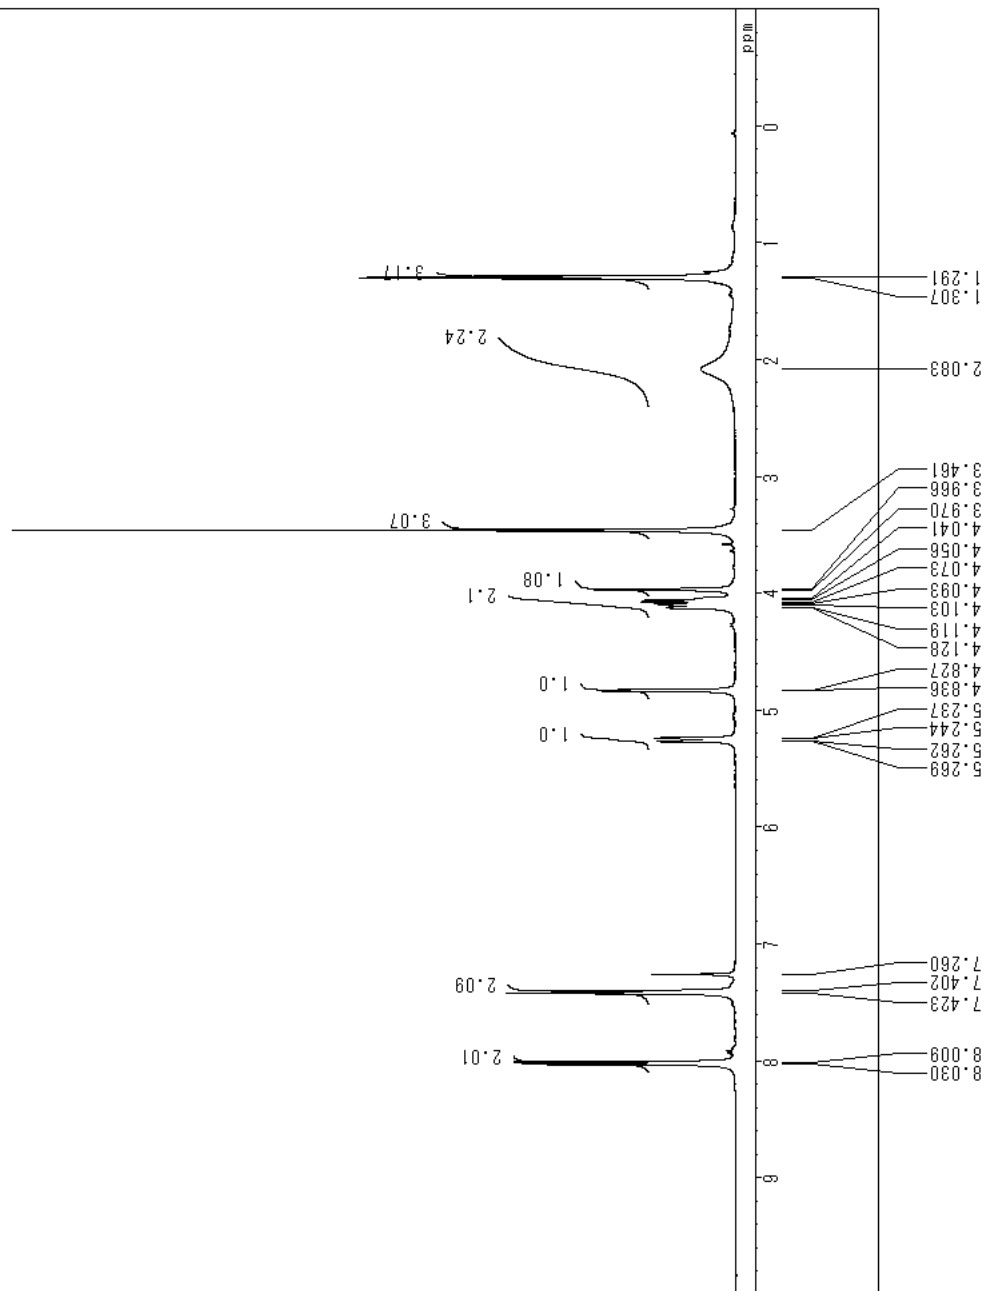



$^1\text{H}$ - $^1\text{H}$  COSY spectrum of **3m**

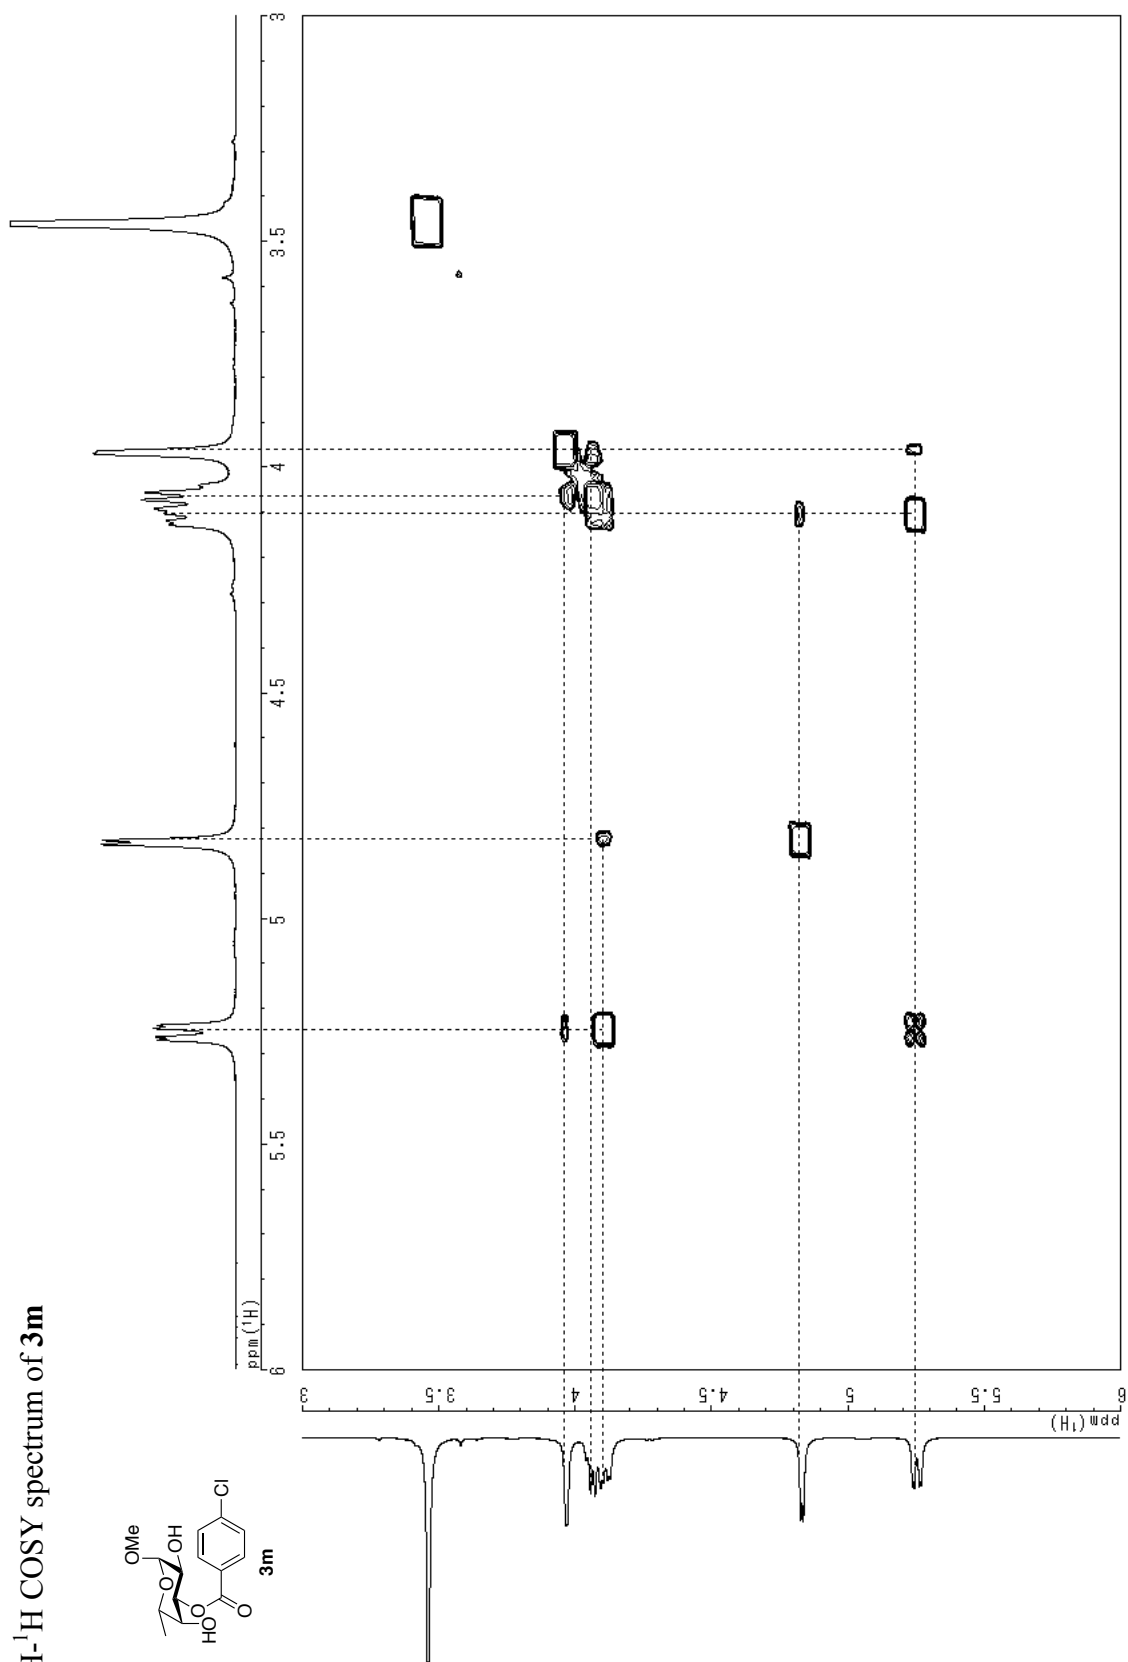

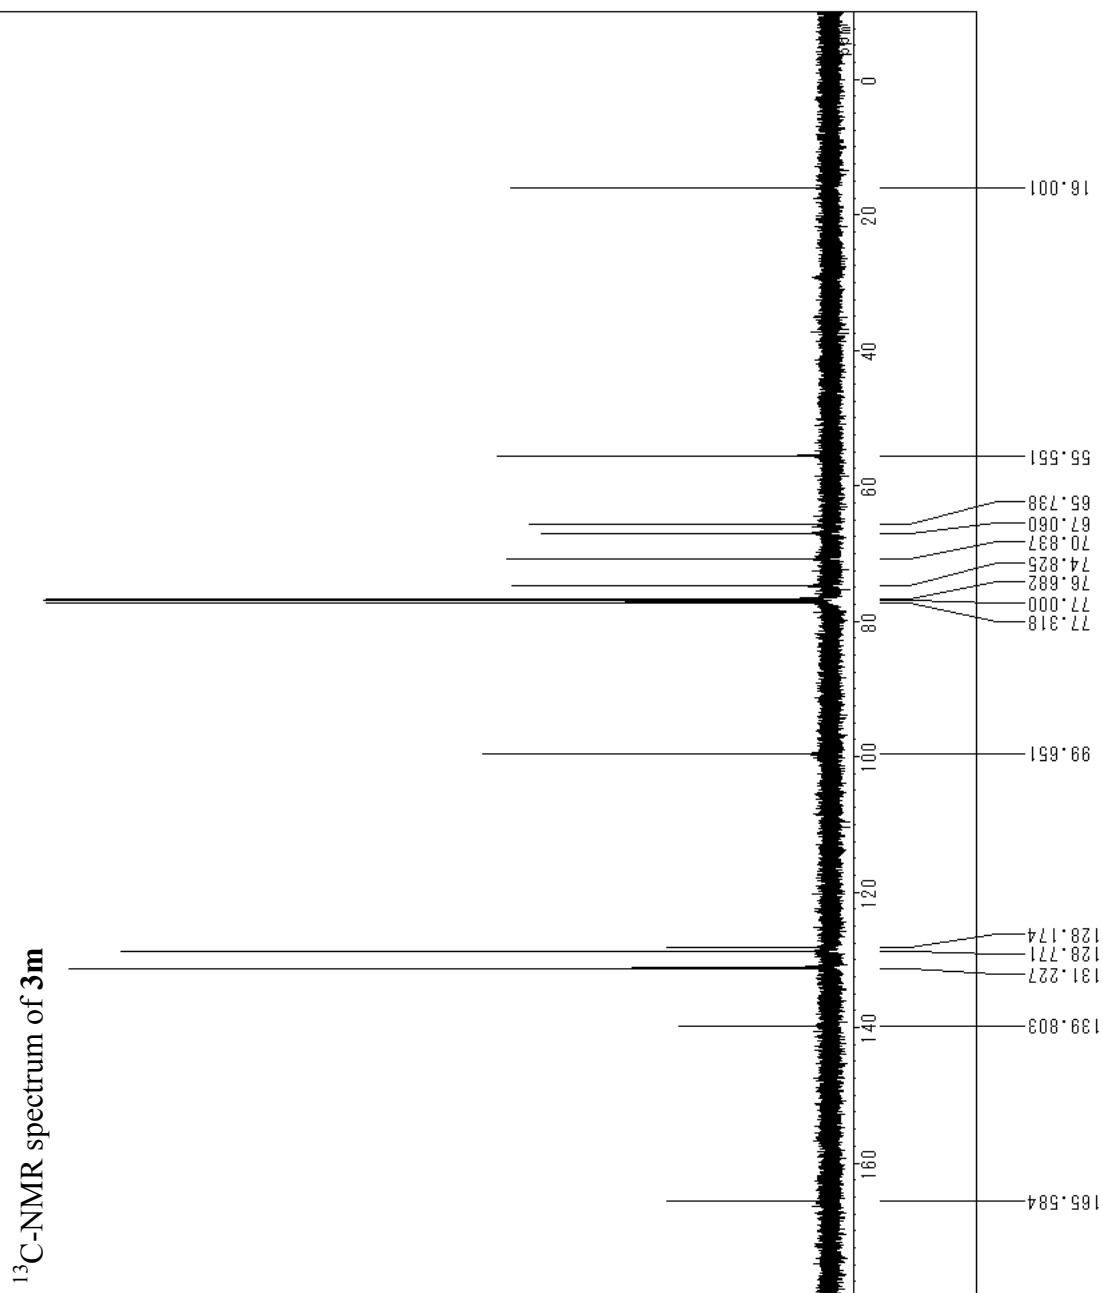

Comment TSV17035\_pure\_13C\_COSY\_2  
 0170919\_01  
 Date 2017/Sep/19  
 ObsNuc <sup>13</sup>C  
 ExMode CARBON\_001  
 ObsFreq 100.45 MHz  
 Scan 512  
 AcqTime 1.3631 s  
 Acc. Interval 3.3631 s  
 Spinning 20.0 Hz  
 Temperature 25.0 °C  
 Solvent cdcl<sub>3</sub>

Methyl 3-*O*-4-trifluoromethylbenzoyl- $\alpha$ -L-fucopyranoside (**3n**)

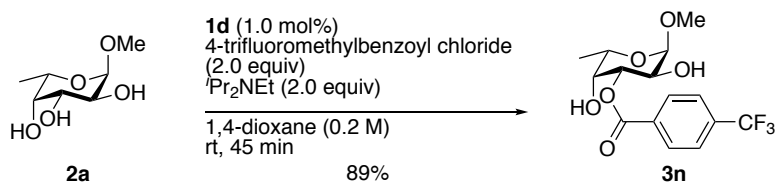

$^1\text{H-NMR}$  spectrum (crude reaction mixture in the presence of catalyst **1d**)

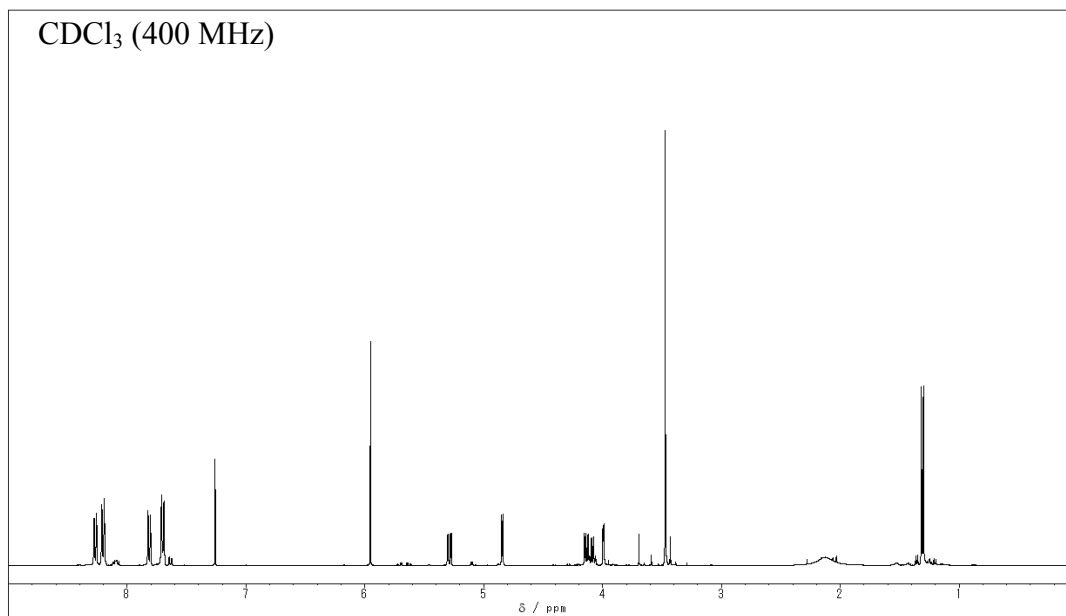

$^1\text{H-NMR}$  spectrum (crude reaction mixture in the absence of catalyst **1d**)

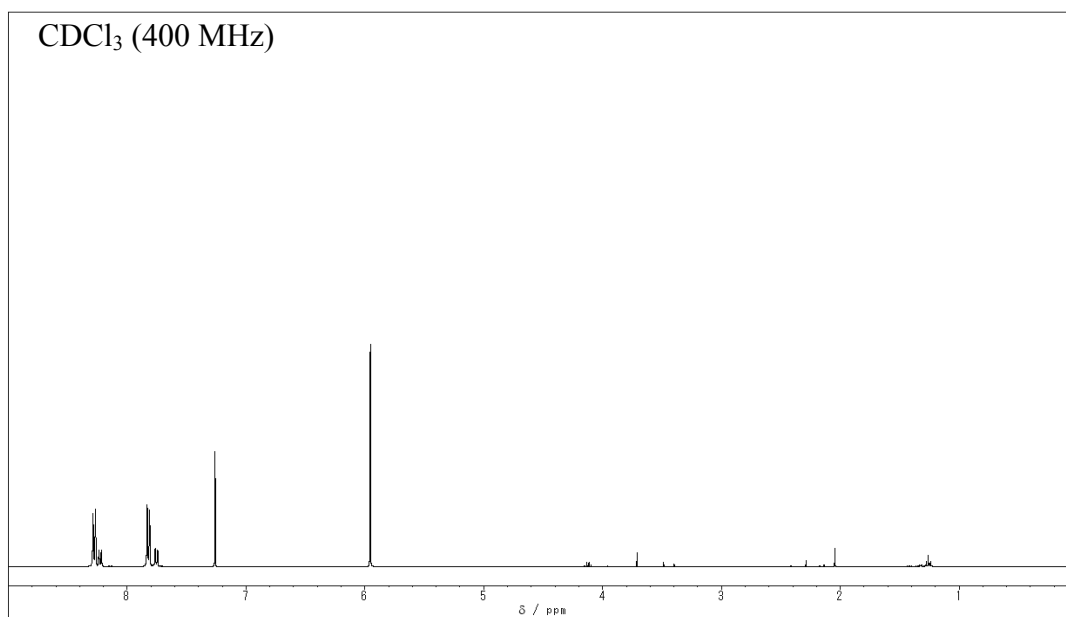

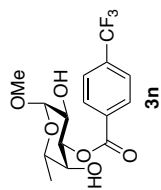

<sup>1</sup>H-NMR spectrum of **3n**

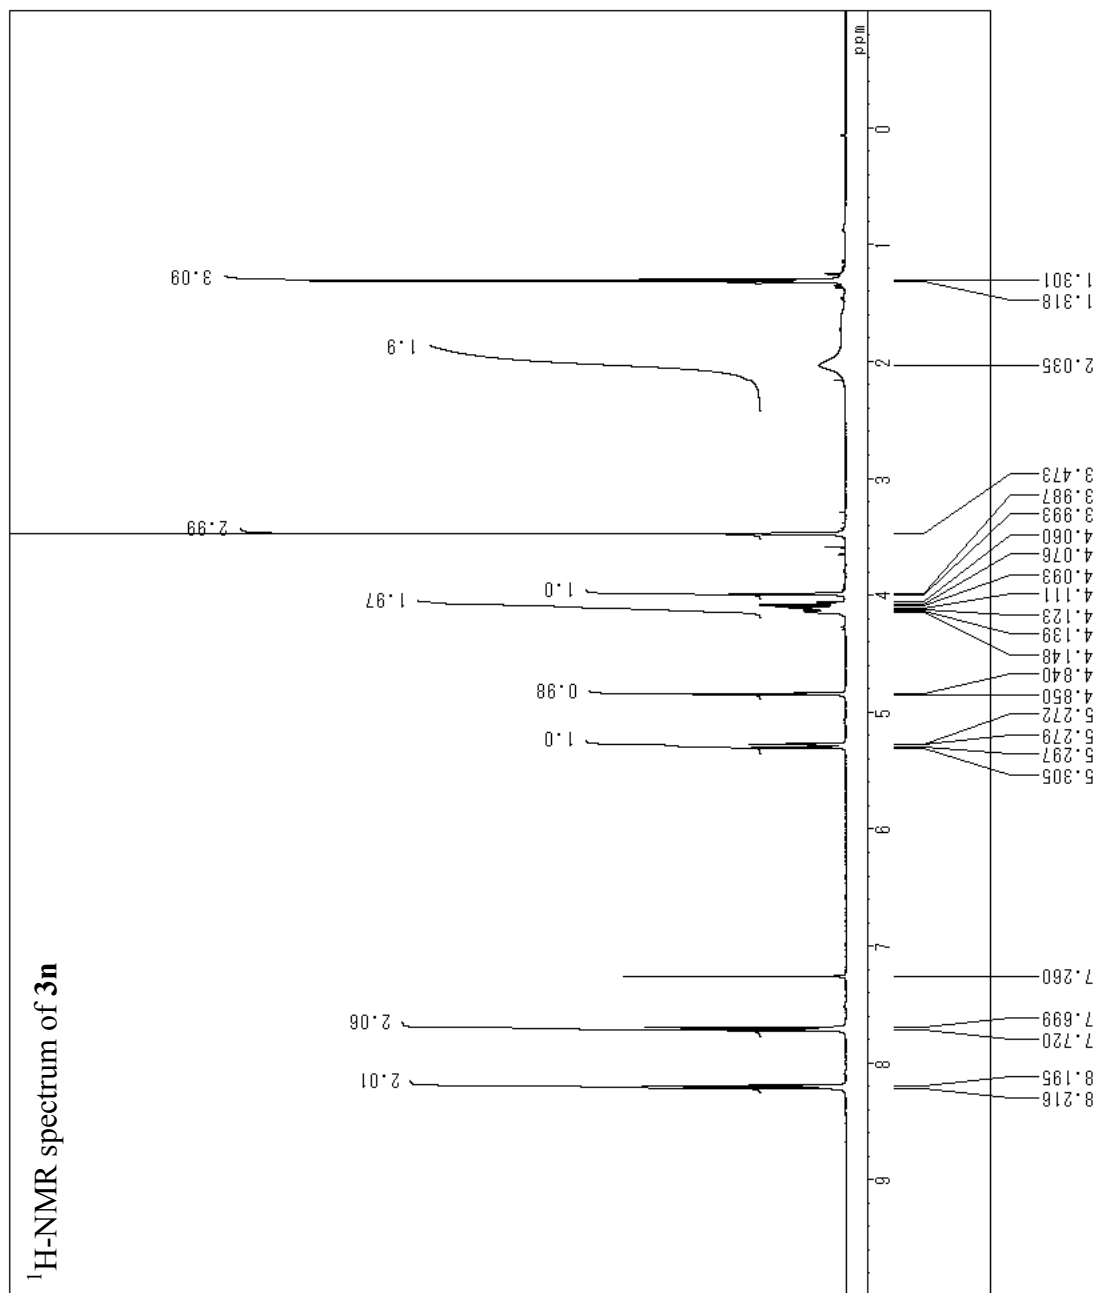

Comment TSV18022\_pure\_13C\_COSY\_2  
 0171005\_01  
 Date 2017/Oct/05  
 ObsNuc <sup>1</sup>H  
 ExMode PROTON\_001  
 ObsFreq 399.45 MHz  
 Scan 8  
 AcqTime 2.589 s  
 Acc. Interval 5.589 s  
 Spinning 18.0 Hz  
 Temperature 25.0 °C  
 Solvent cdcl<sub>3</sub>

$^1\text{H}$ - $^1\text{H}$  COSY spectrum of **3n**

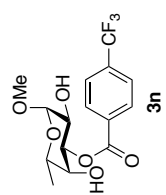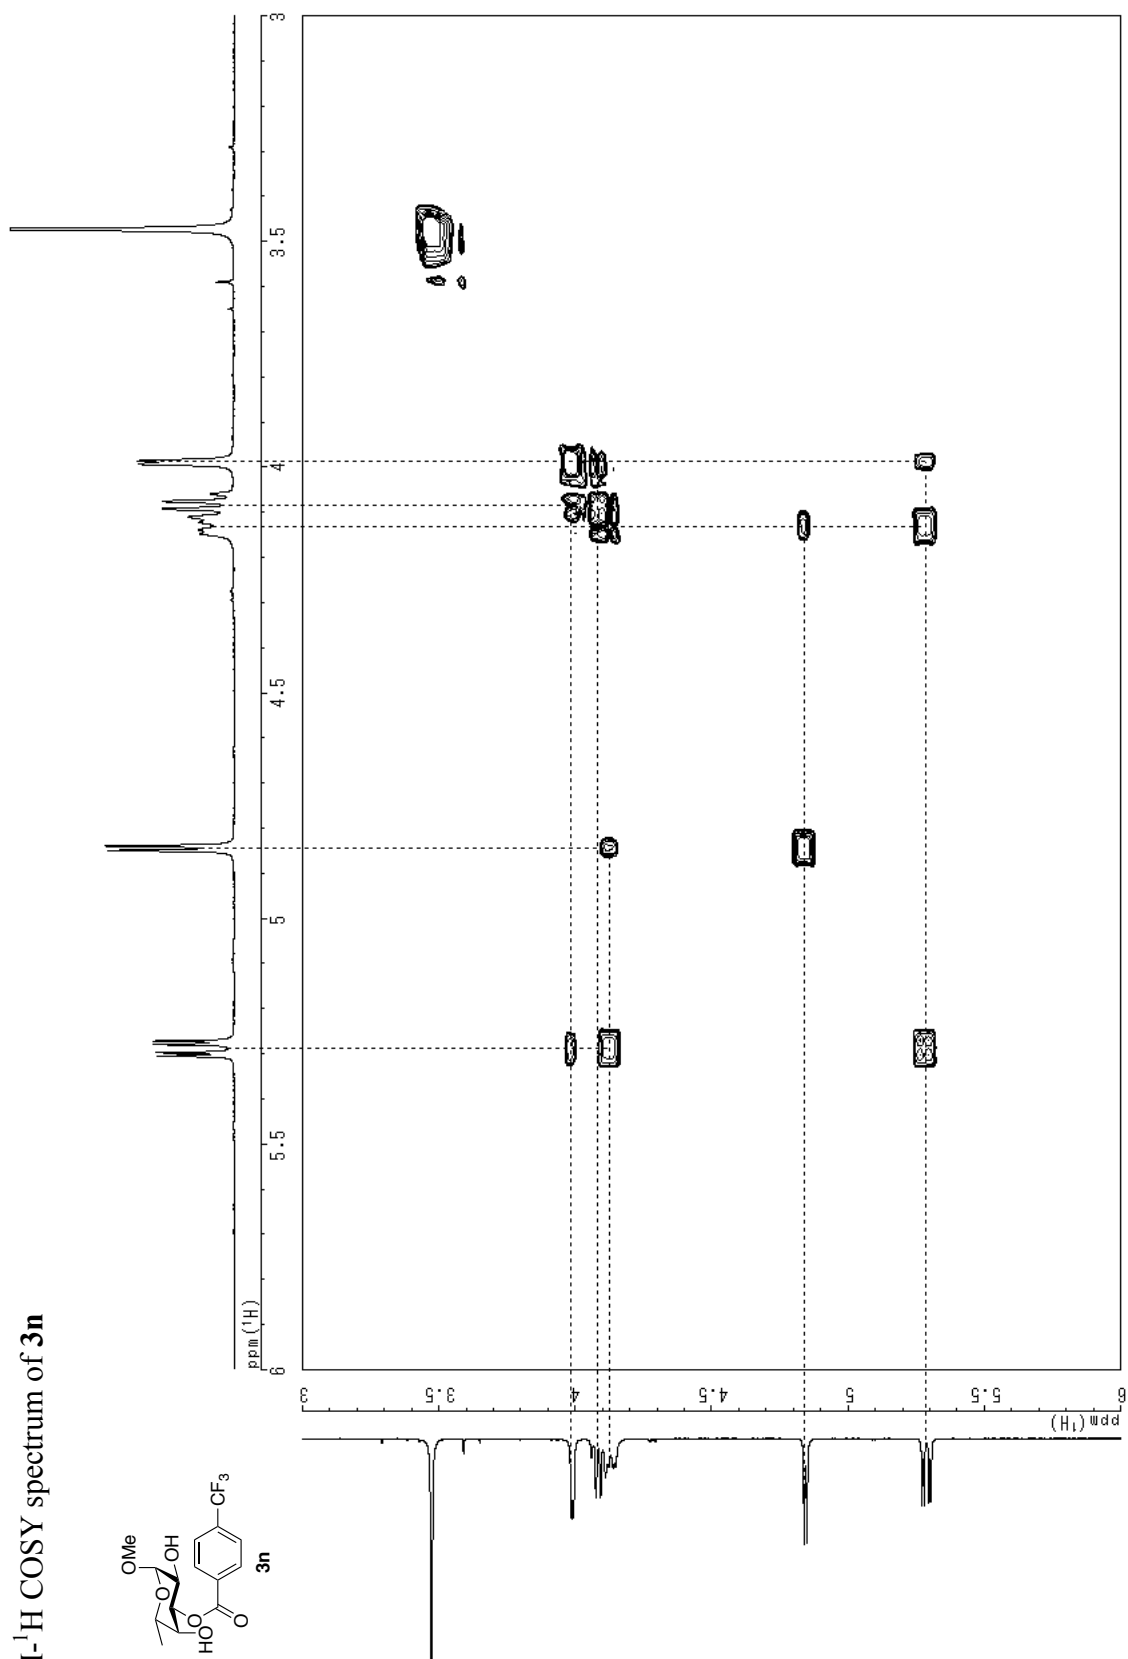

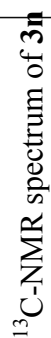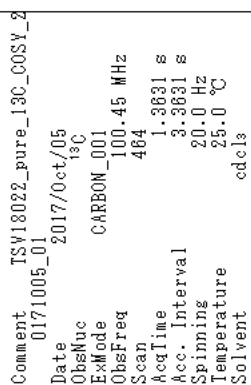

Methyl 3-*O*-4-nitrobenzoyl- $\alpha$ -L-fucopyranoside (**3o**)

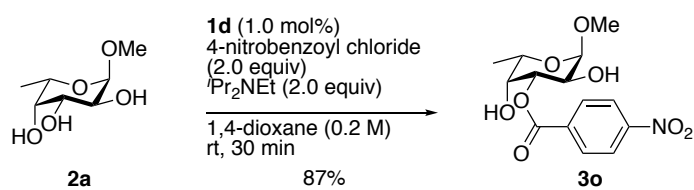

$^1\text{H}$ -NMR spectrum (crude reaction mixture in the presence of catalyst **1d**)

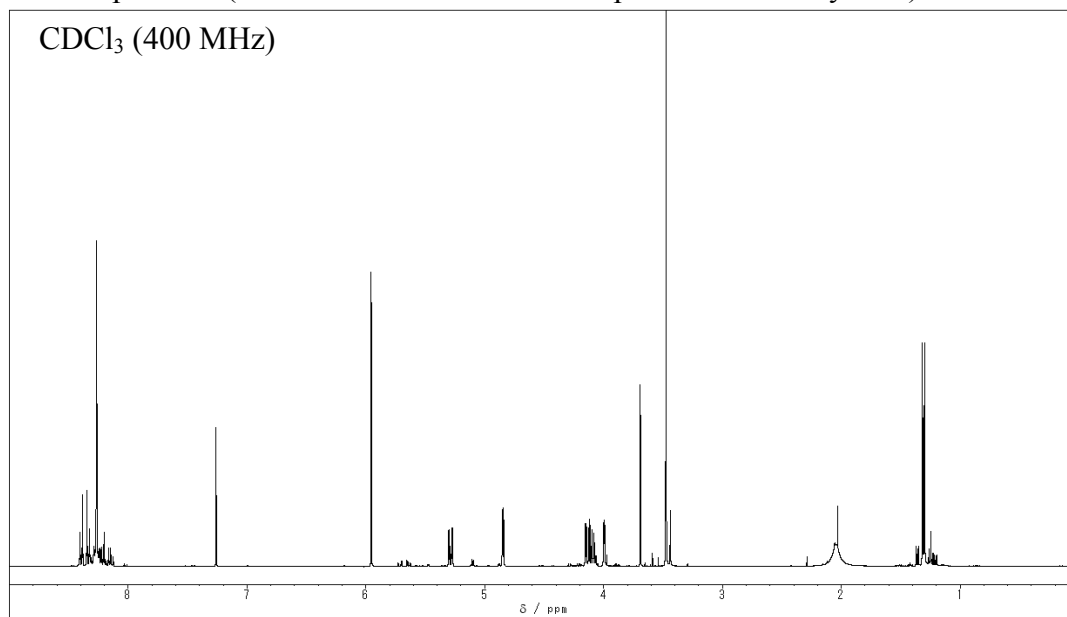

$^1\text{H}$ -NMR spectrum (crude reaction mixture in the absence of catalyst **1d**)

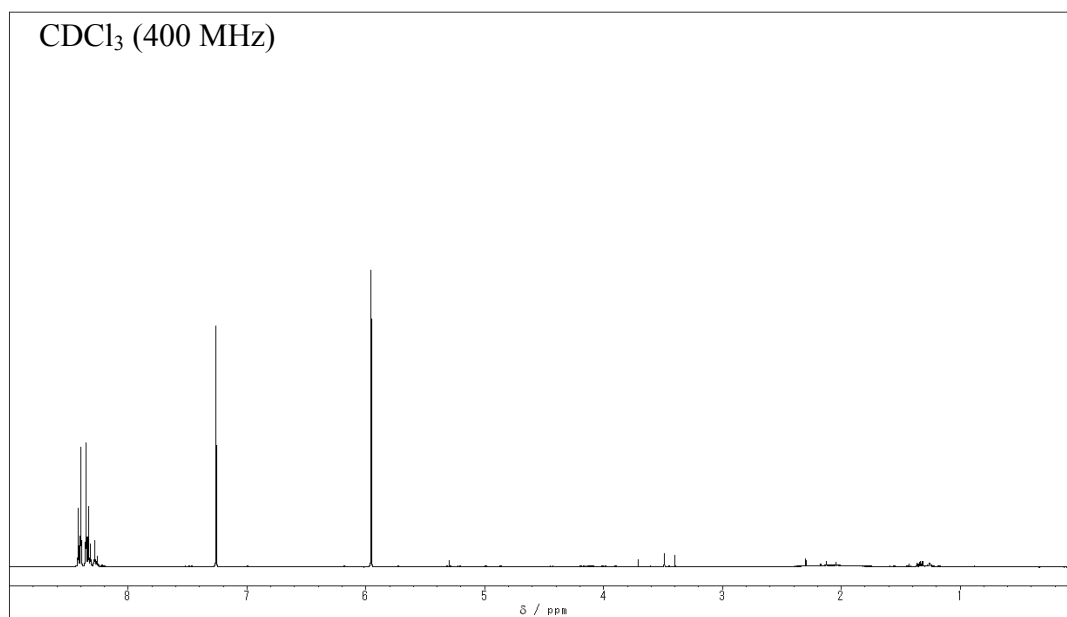

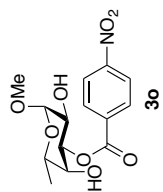

<sup>1</sup>H-NMR spectrum of **3o**

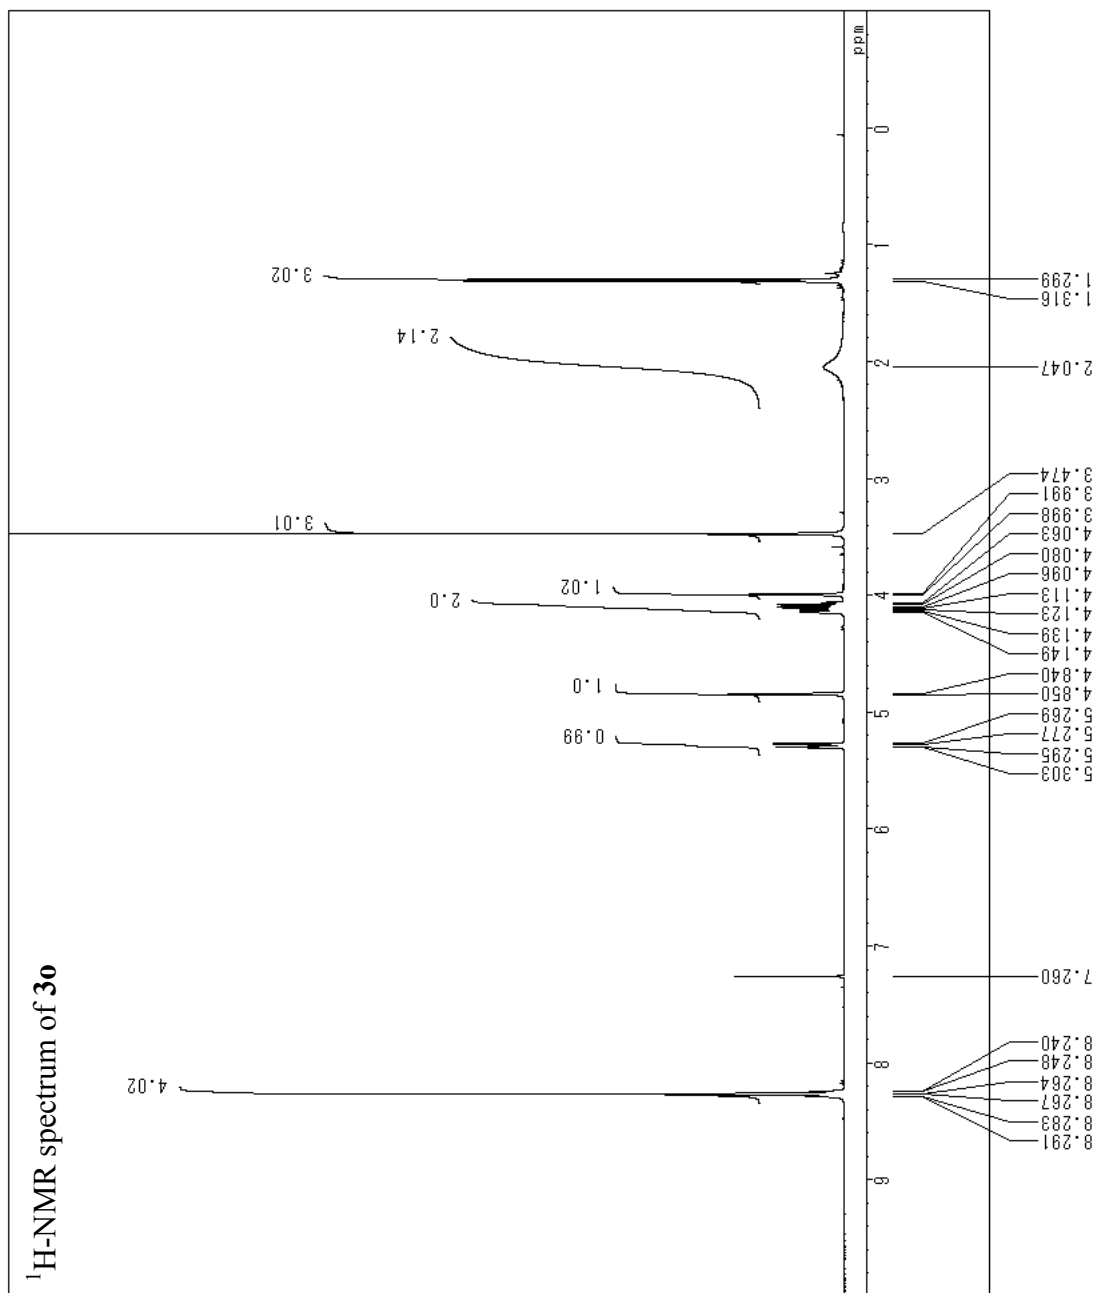

Comment TSV18008\_pure\_13C\_COSY\_2  
 0170928\_01  
 Date 2017/Sep/28  
 ObsNuc <sup>1</sup>H  
 ExMode PROTON\_001  
 ObsFreq 399.45 MHz  
 Scan 8  
 AcqTime 2.589 s  
 Acc. Interval 5.589 s  
 Spinning 18.0 Hz  
 Temperature 25.0 °C  
 Solvent cdcl<sub>3</sub>



$^1\text{H}$ - $^1\text{H}$  COSY spectrum of **3o**

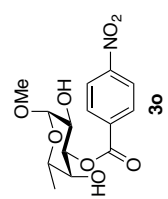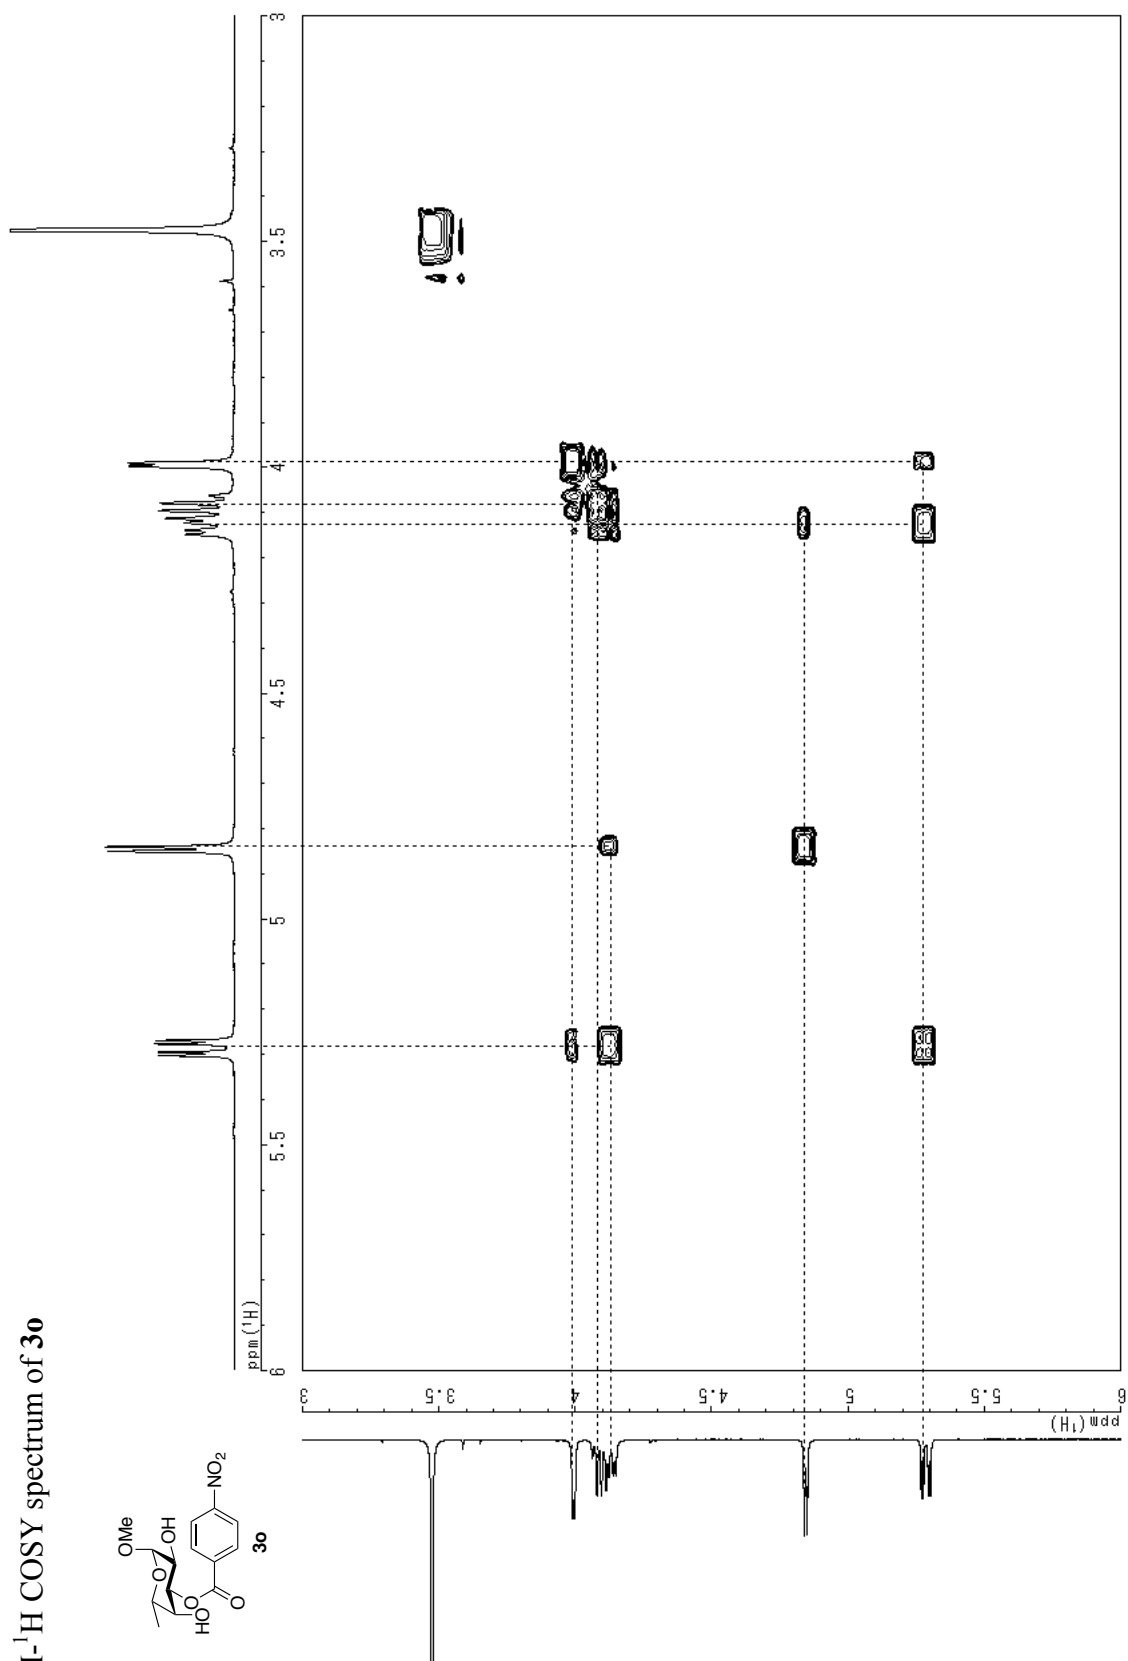

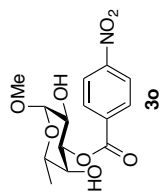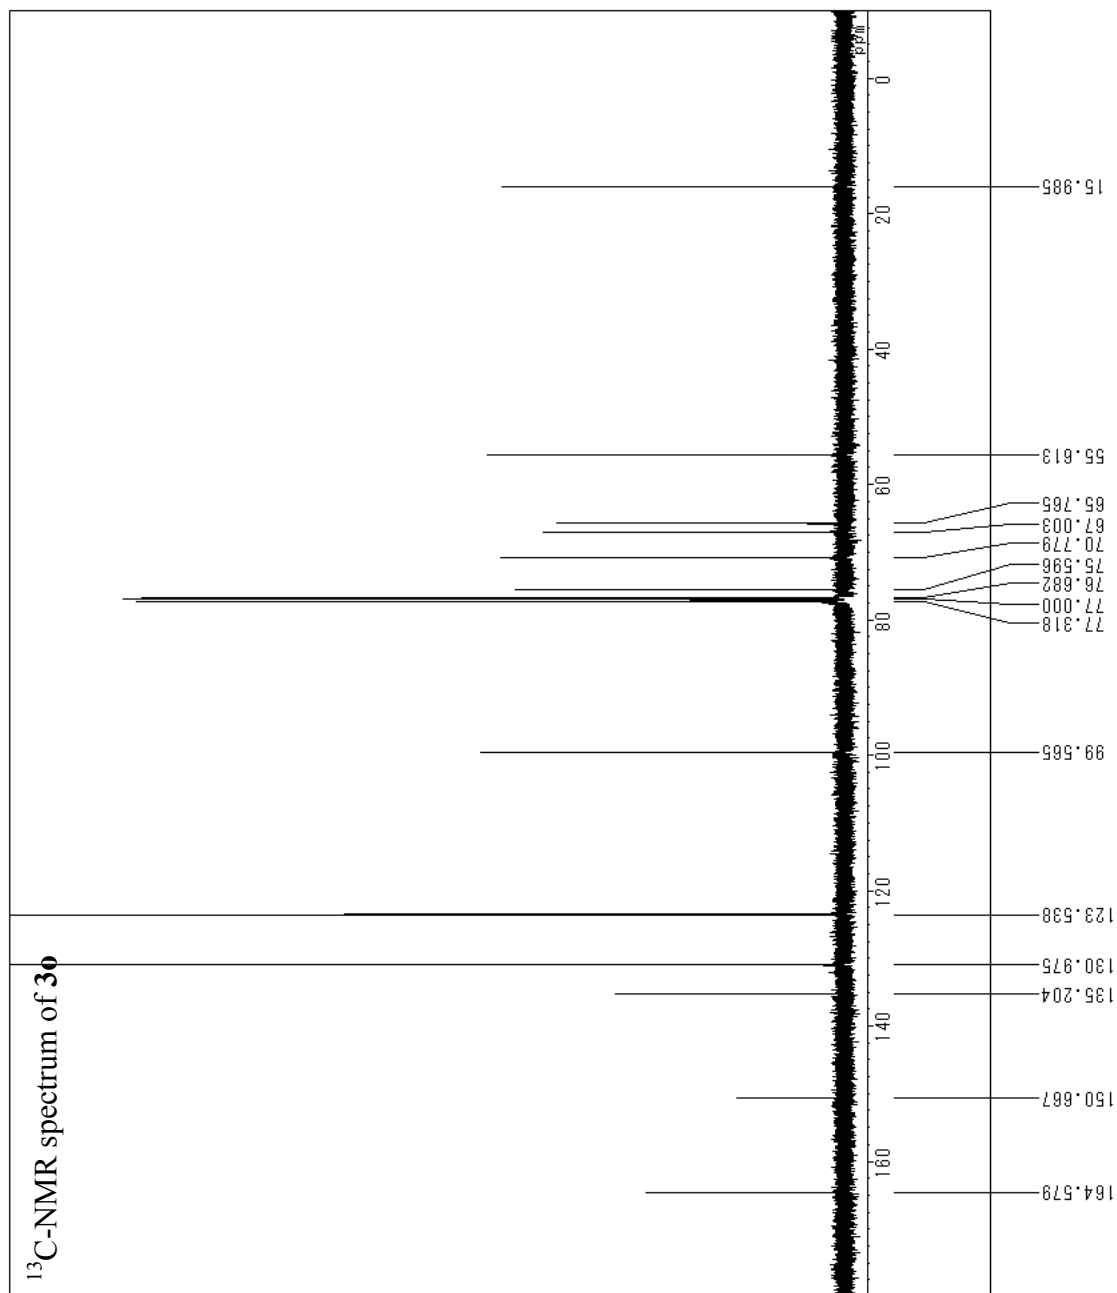

Comment TSV18008\_pure\_13C\_COSY\_2  
 Date 0170928\_01  
 ObsNuc <sup>13</sup>C  
 ExMode CARBON\_001  
 ObsFreq 100.45 MHz  
 Scan 512  
 AcqTime 1.3831 s  
 Acc. Interval 3.3831 s  
 Spinning 20.0 Hz  
 Temperature 25.0 °C  
 Solvent cdcl<sub>3</sub>

Methyl 3-*O*-2-methylbenzoyl- $\alpha$ -L-fucopyranoside (**3p**)

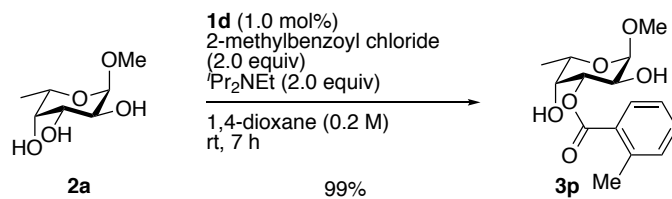

$^1\text{H-NMR}$  spectrum (crude reaction mixture in the presence of catalyst **1d**)

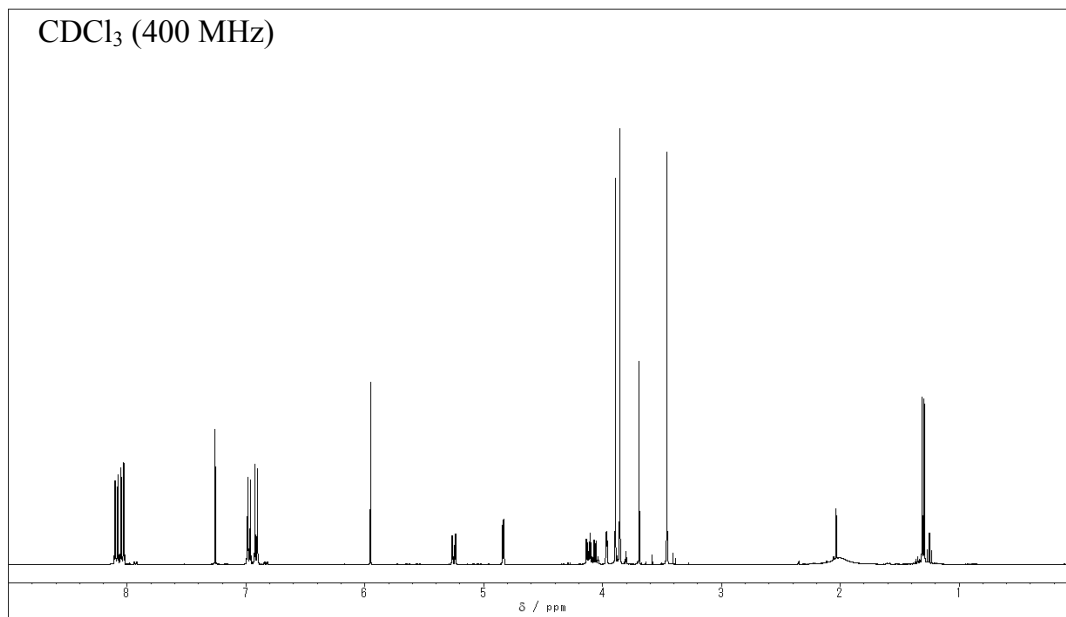

$^1\text{H-NMR}$  spectrum (crude reaction mixture in the absence of catalyst **1d**)

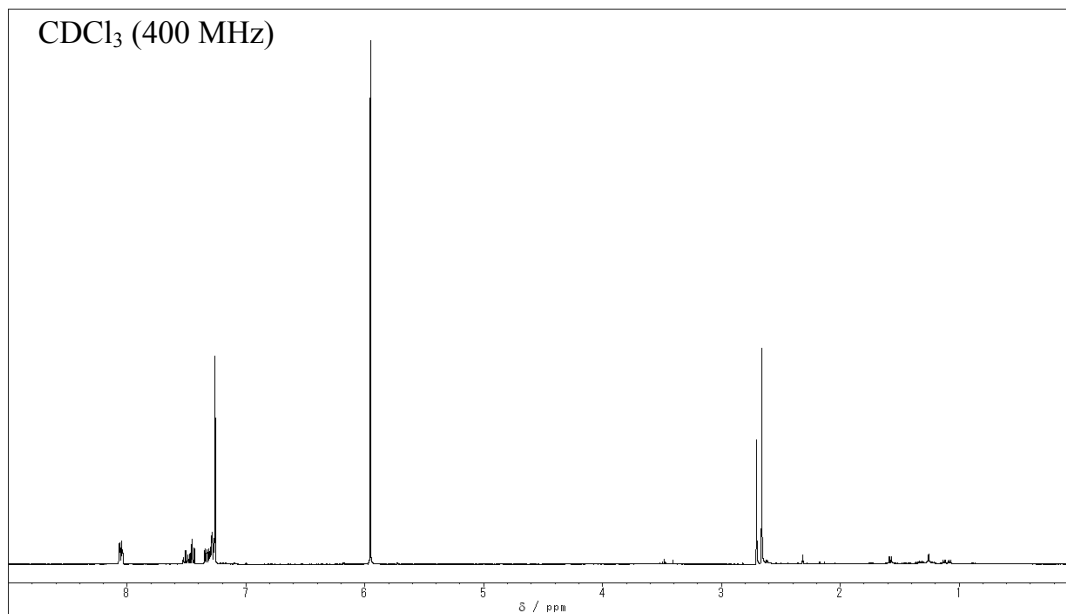

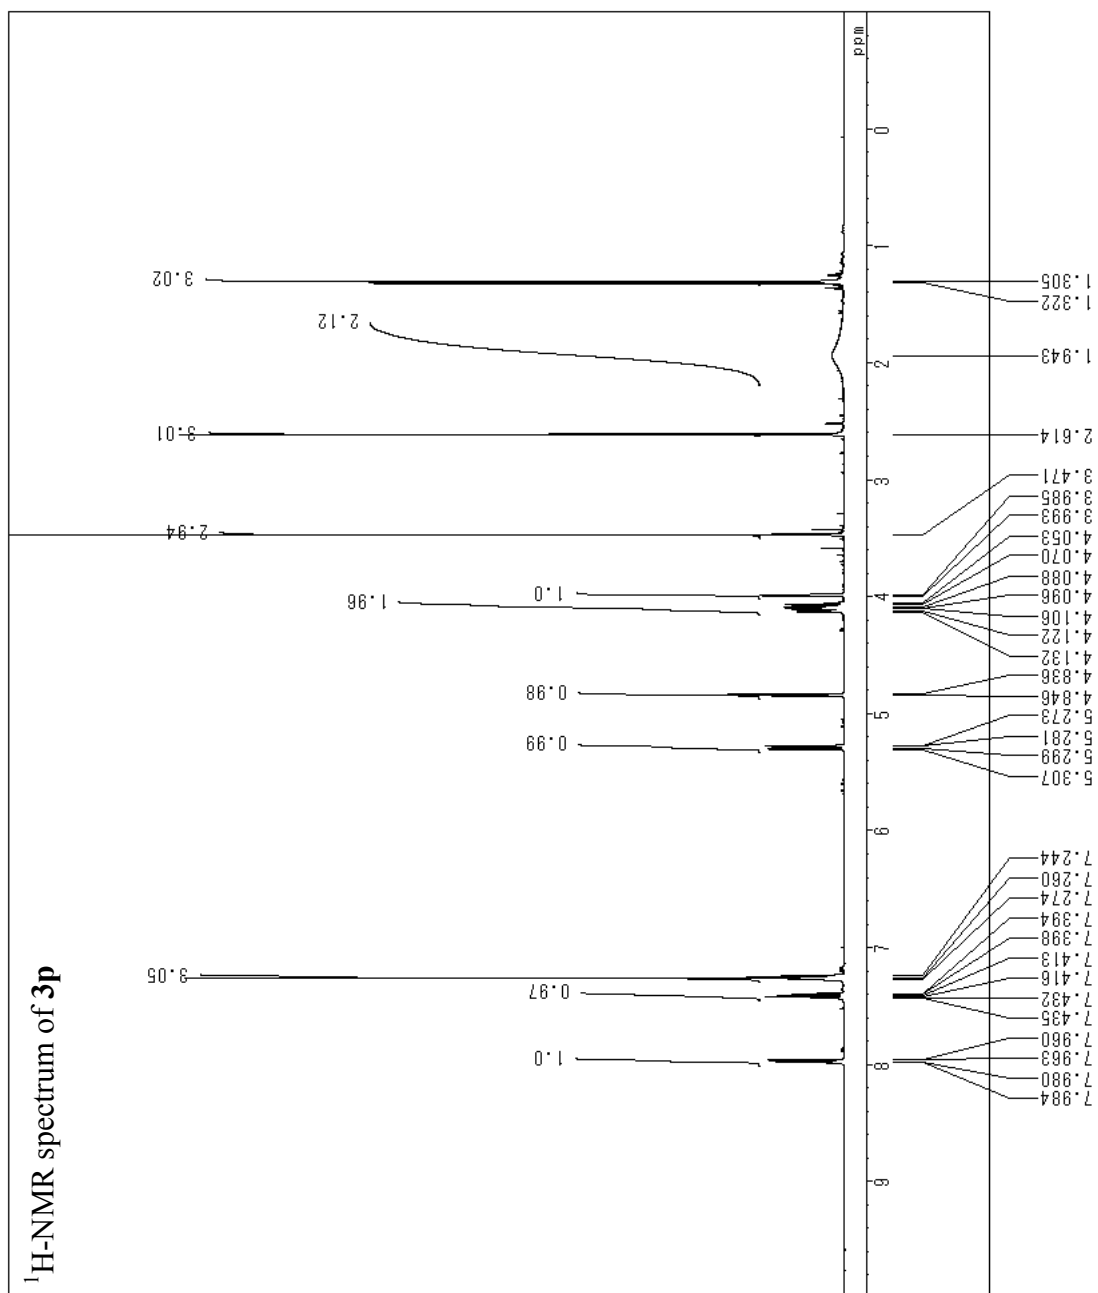

Comment TSV17030\_pure\_20170909\_0  
 1  
 Date 2017/Sep/09  
 ObsNuc <sup>1</sup>H  
 ExMode PROTON\_001  
 ObsFreq 399.45 MHz  
 Scan 8  
 AcqTime 2.589 s  
 Acc. Interval 5.589 s  
 Spinning 16.0 Hz  
 Temperature 25.0 °C  
 Solvent cdcl<sub>3</sub>

$^1\text{H}$ - $^1\text{H}$  COSY spectrum of **3p**

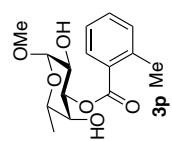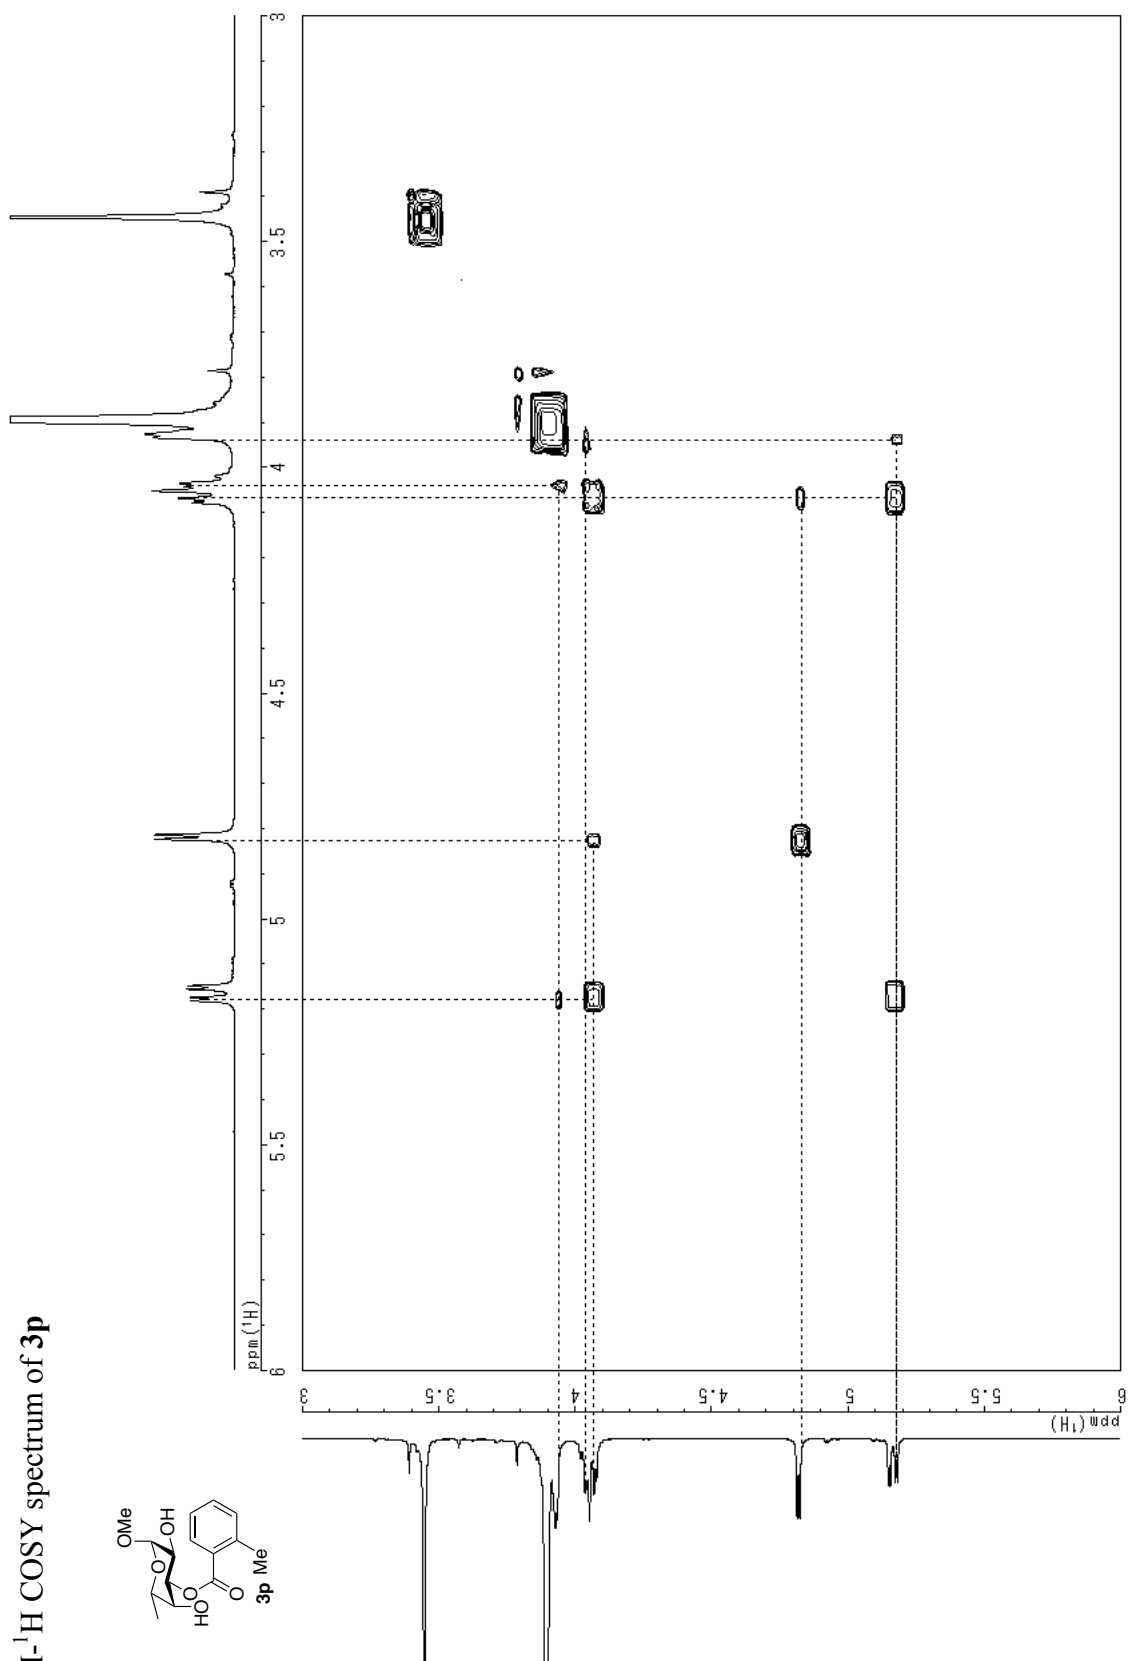

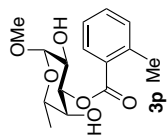

# <sup>13</sup>C-NMR spectrum of 3p

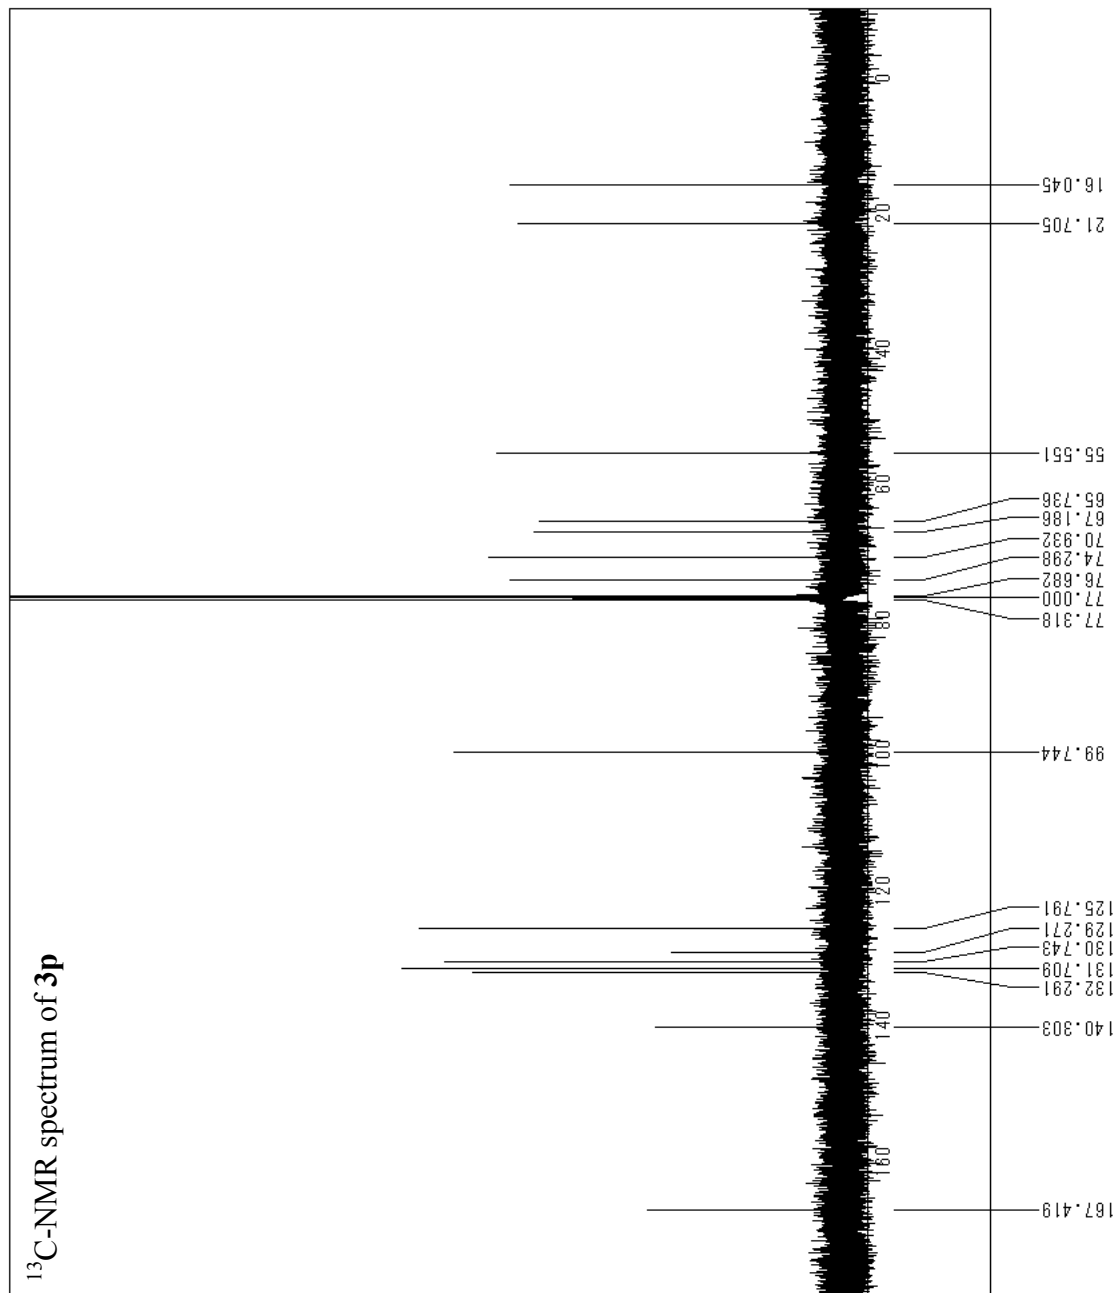

Comment TSV17030\_COSY\_13C\_20170809\_01  
 Date 2017/Sep/09  
 ObsNuc <sup>13</sup>C  
 ExMode CARBON\_001  
 ObsFreq 100.45 MHz  
 Scan 256  
 AcqTime 1.3631 s  
 Acc. Interval 3.3631 s  
 Spinning 20.0 Hz  
 Temperature 25.0 °C  
 Solvent cdcl<sub>3</sub>

Methyl 3-*O*-3,4,5-trimethylgalloyl- $\alpha$ -L-fucopyranoside (**3q**)

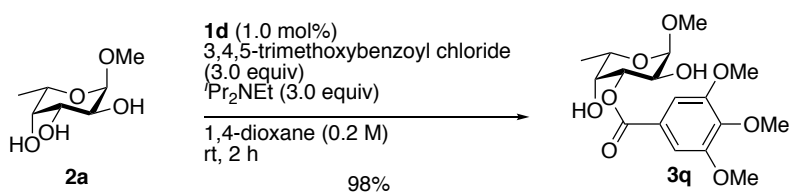

$^1\text{H-NMR}$  spectrum (crude reaction mixture in the presence of catalyst **1d**)

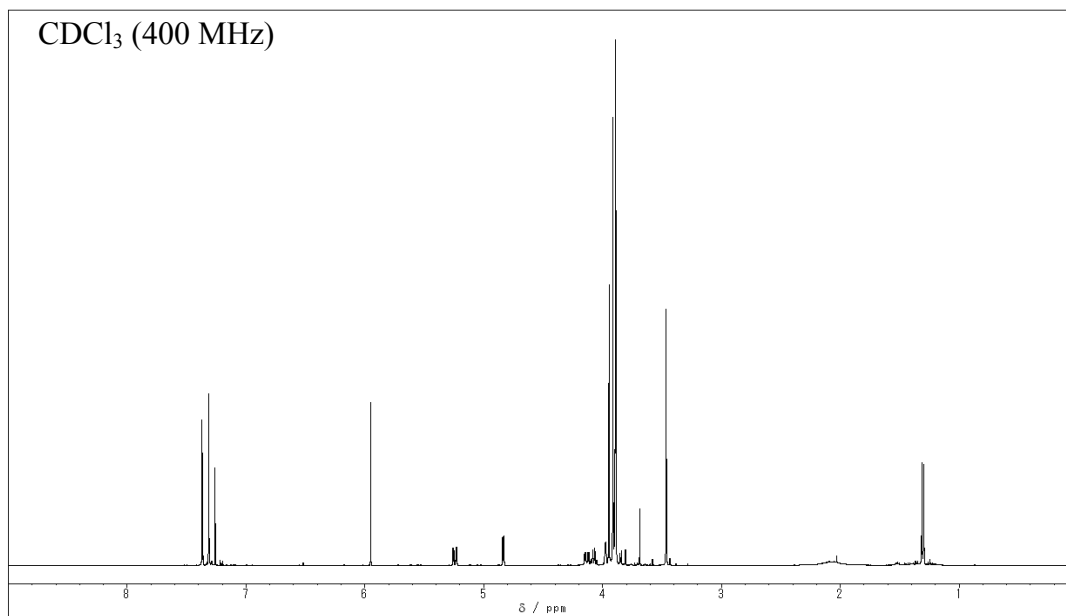

$^1\text{H-NMR}$  spectrum (crude reaction mixture in the absence of catalyst **1d**)

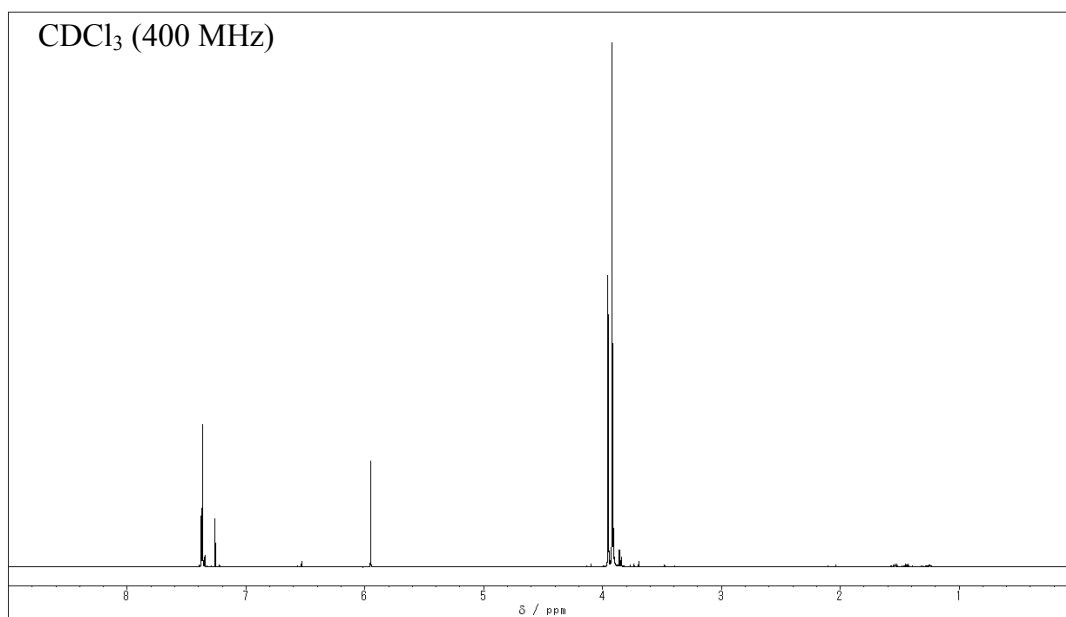

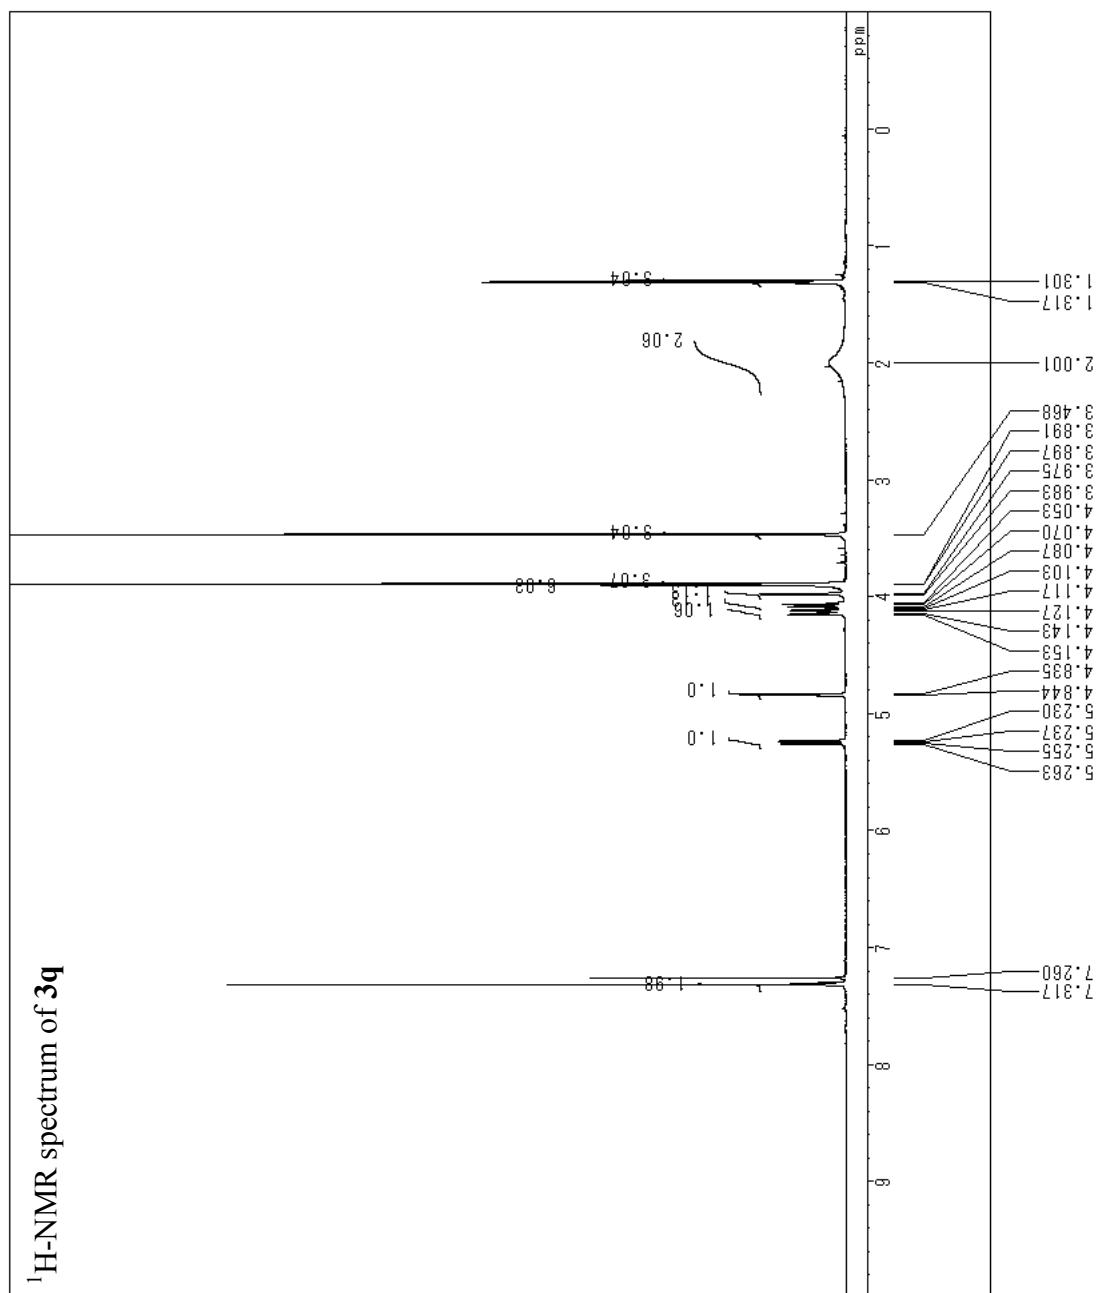

Comment TSV18002\_pure\_13C\_COSY\_2  
 0170928\_01  
 Date 2017/Sep/28  
 ObsNuc <sup>1</sup>H  
 ExMode PROTON\_001  
 ObsFreq 399.45 MHz  
 Scan 8  
 AcqTime 2.569 s  
 Acc. Interval 5.589 s  
 Spinning 16.0 Hz  
 Temperature 25.0 °C  
 Solvent cdcl<sub>3</sub>



$^1\text{H}$ - $^1\text{H}$  COSY spectrum of **3q**

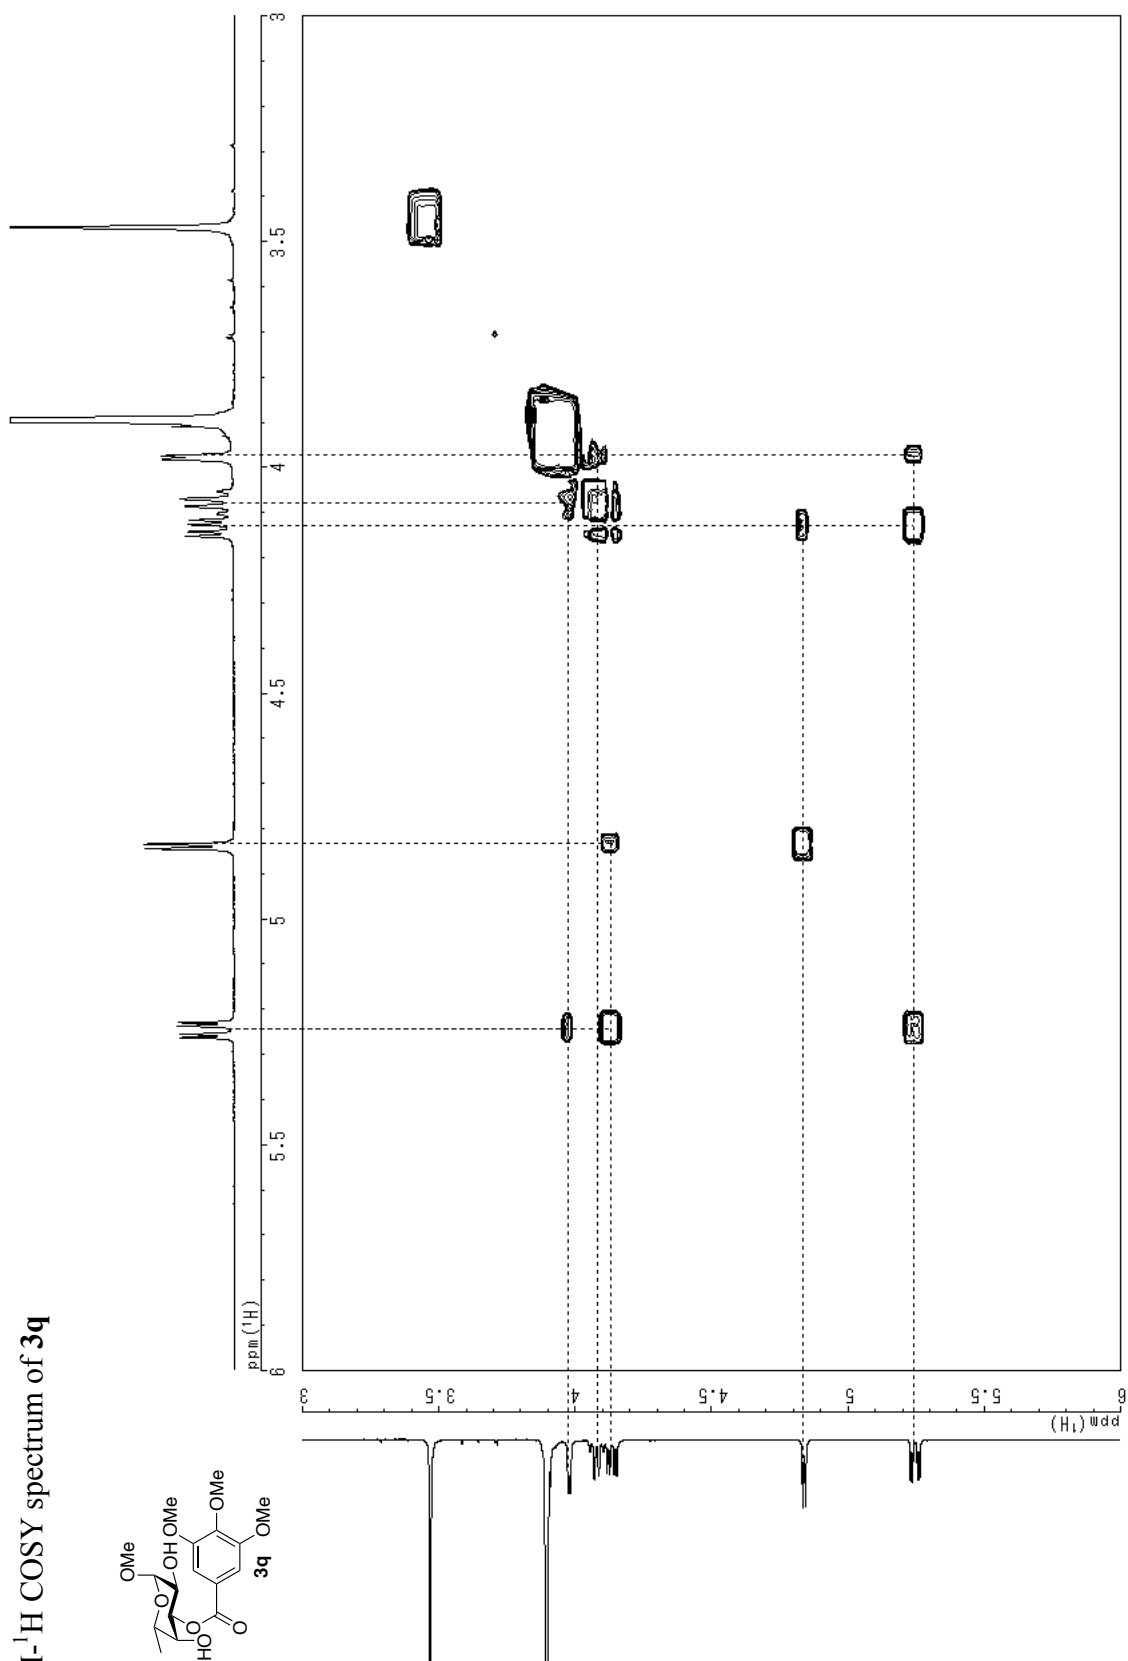

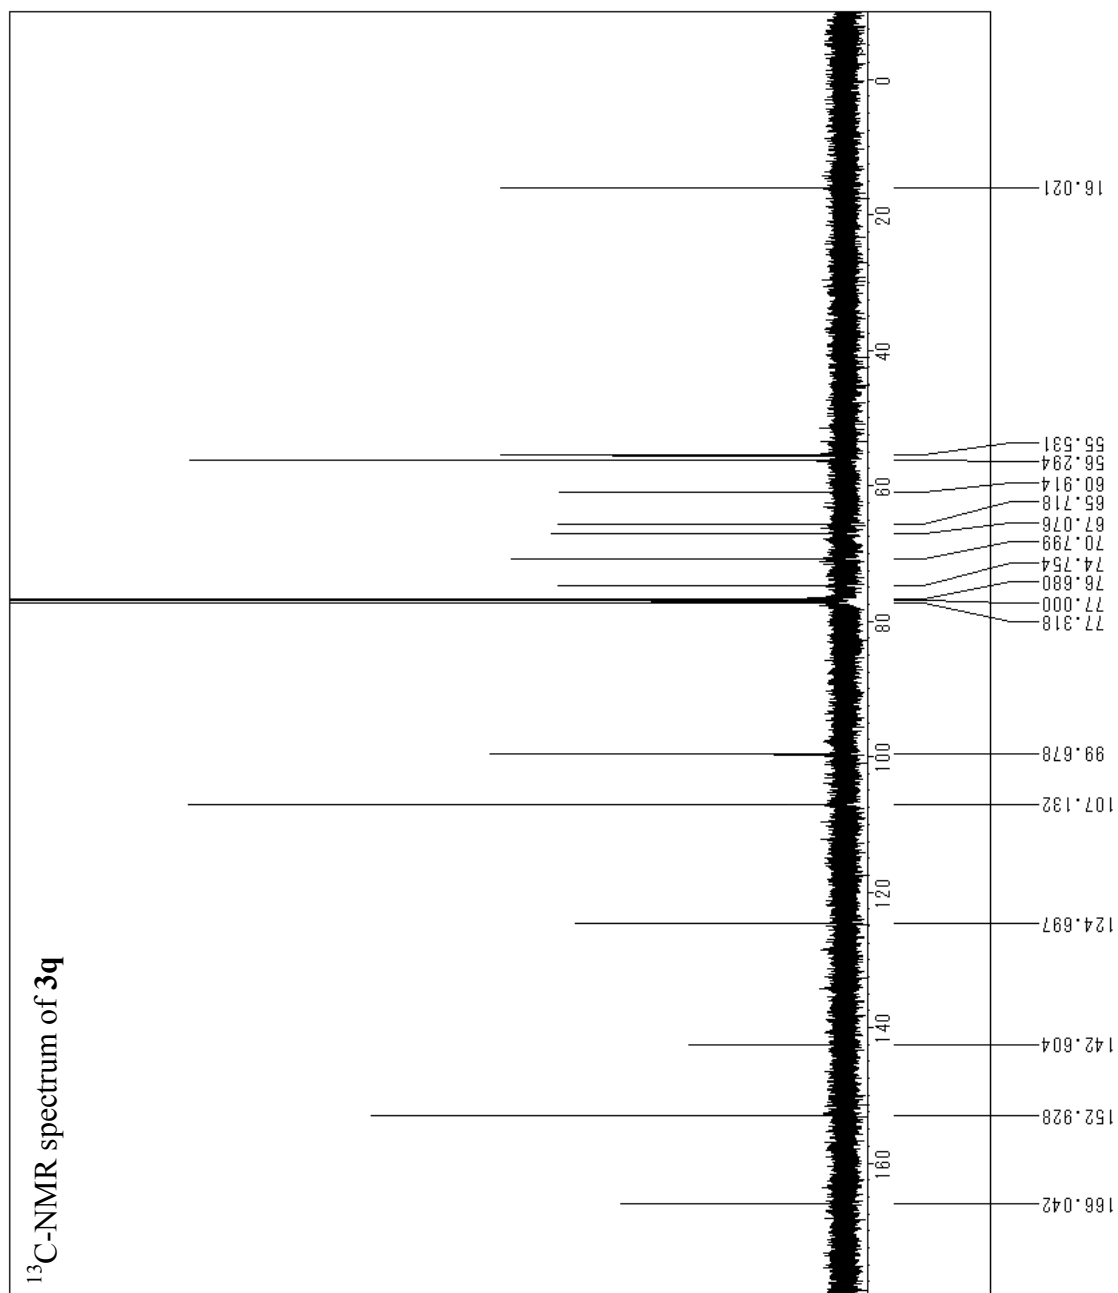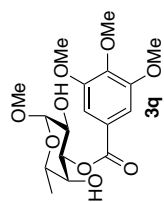

Comment TSV18002\_pure\_13C\_COSY\_2  
 0170928\_01  
 Date 2017/Sep/28  
 ObsNuc <sup>13</sup>C  
 ExMode CARBON\_001  
 ObsFreq 100.45 MHz  
 Scan 512  
 AcqTime 1.3631 s  
 Acc. Interval 3.3631 s  
 Spinning 20.0 Hz  
 Temperature 25.0 °C  
 Solvent cdcl<sub>3</sub>

Methyl 3-*O*-2-thenoyl- $\alpha$ -L-fucopyranoside (**3r**)

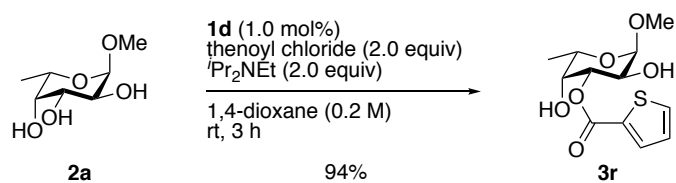

$^1\text{H}$ -NMR spectrum (crude reaction mixture in the presence of catalyst **1d**)

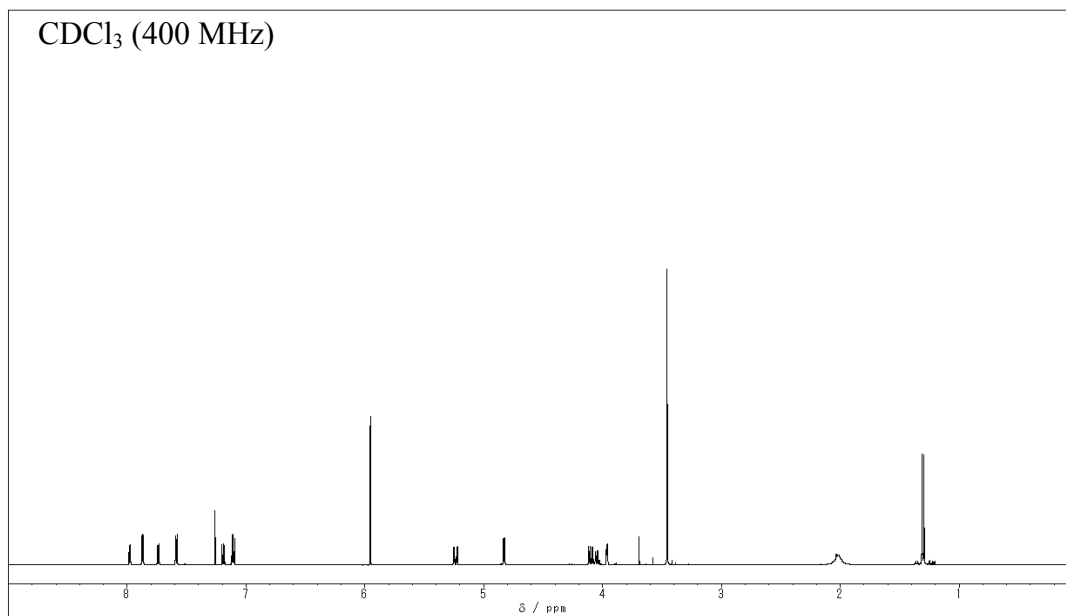

$^1\text{H}$ -NMR spectrum (crude reaction mixture in the absence of catalyst **1d**)

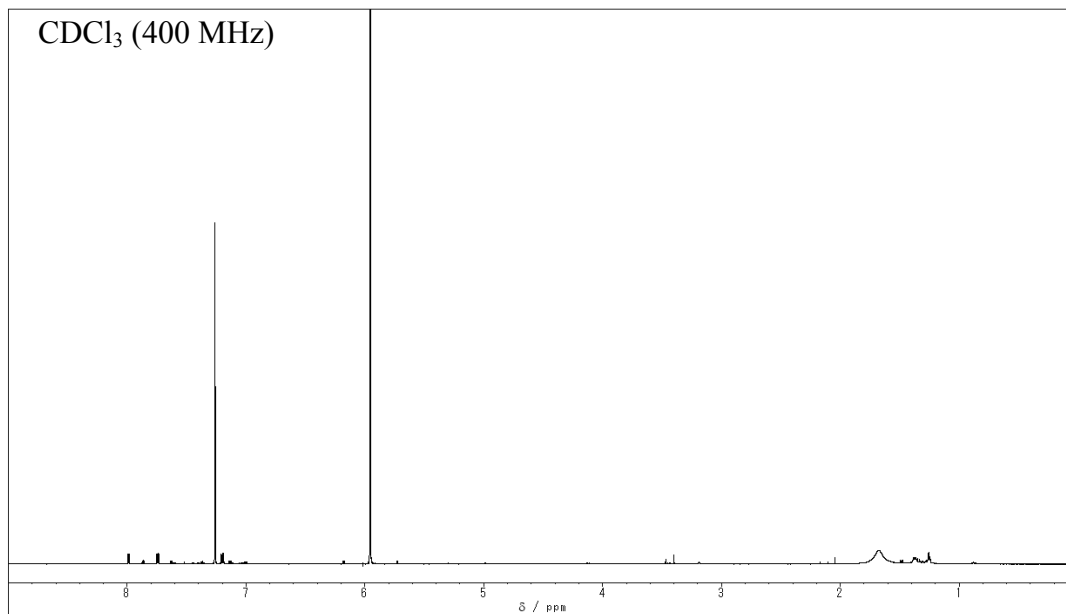

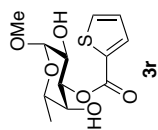

<sup>1</sup>H-NMR spectrum of **3r**

Comment TSV17033\_pure\_13C\_COSY\_2  
 0170918\_01  
 Date 2017/Sep/19  
 ObsNuc <sup>1</sup>H  
 ExMode PROTON\_001  
 ObsFreq 399.45 MHz  
 Scan 8  
 AcqTime 2.589 s  
 Acc. Interval 5.589 s  
 Spinning 18.0 Hz  
 Temperature 25.0 °C  
 Solvent cdcl<sub>3</sub>

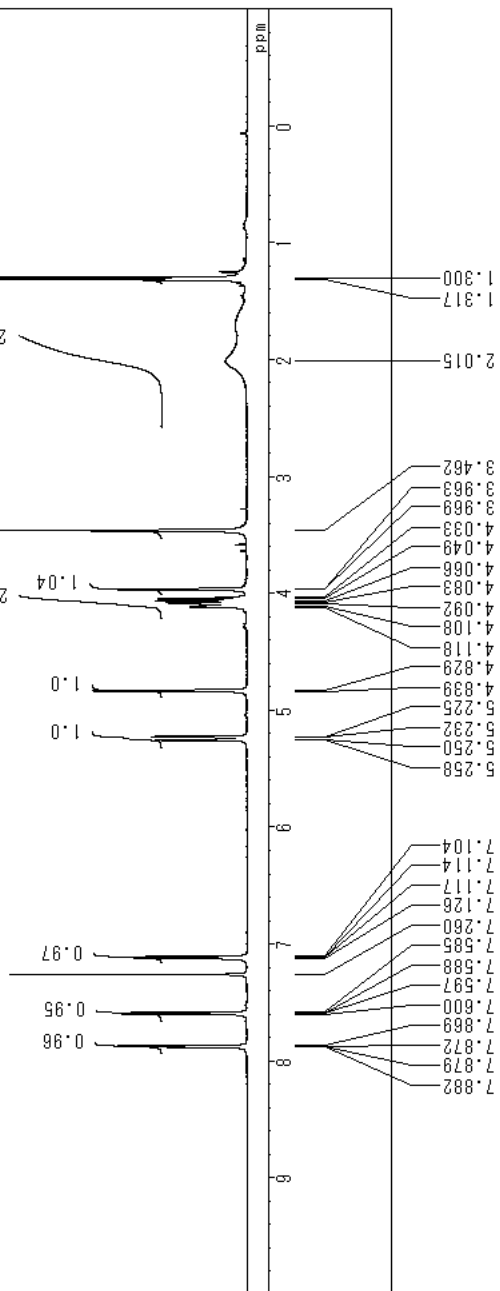

$^1\text{H}$ - $^1\text{H}$  COSY spectrum of **3r**

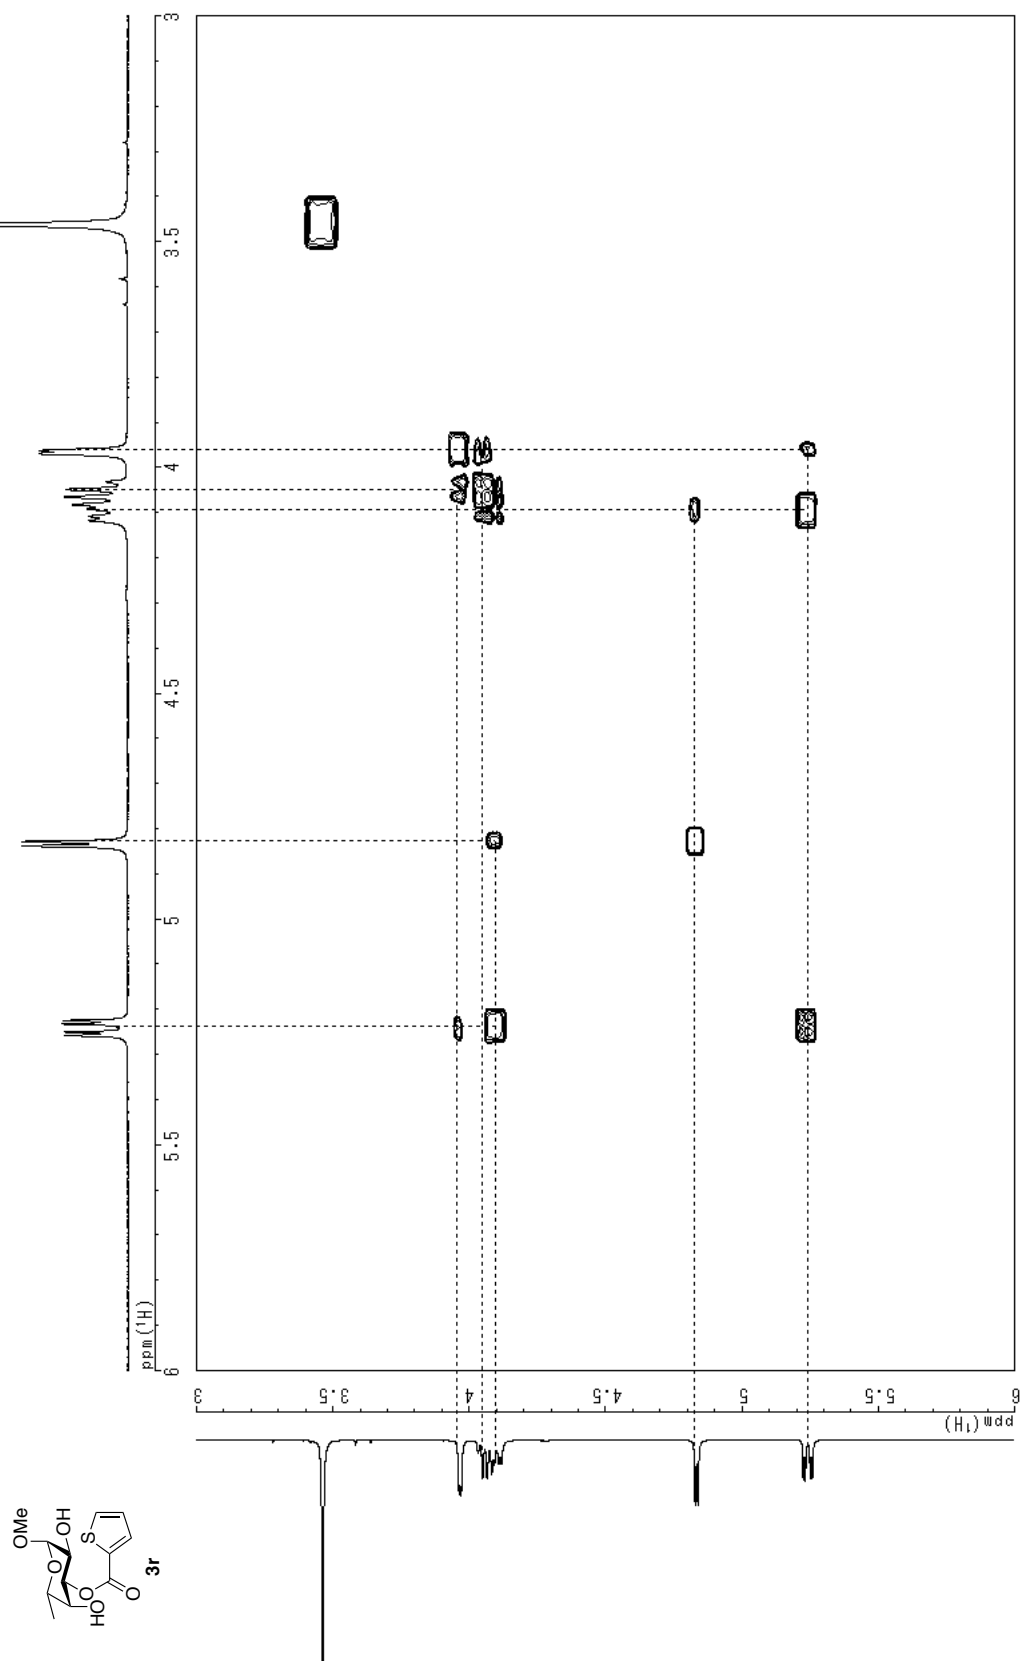

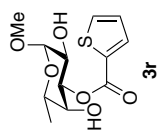

# <sup>13</sup>C-NMR spectrum of **3r**

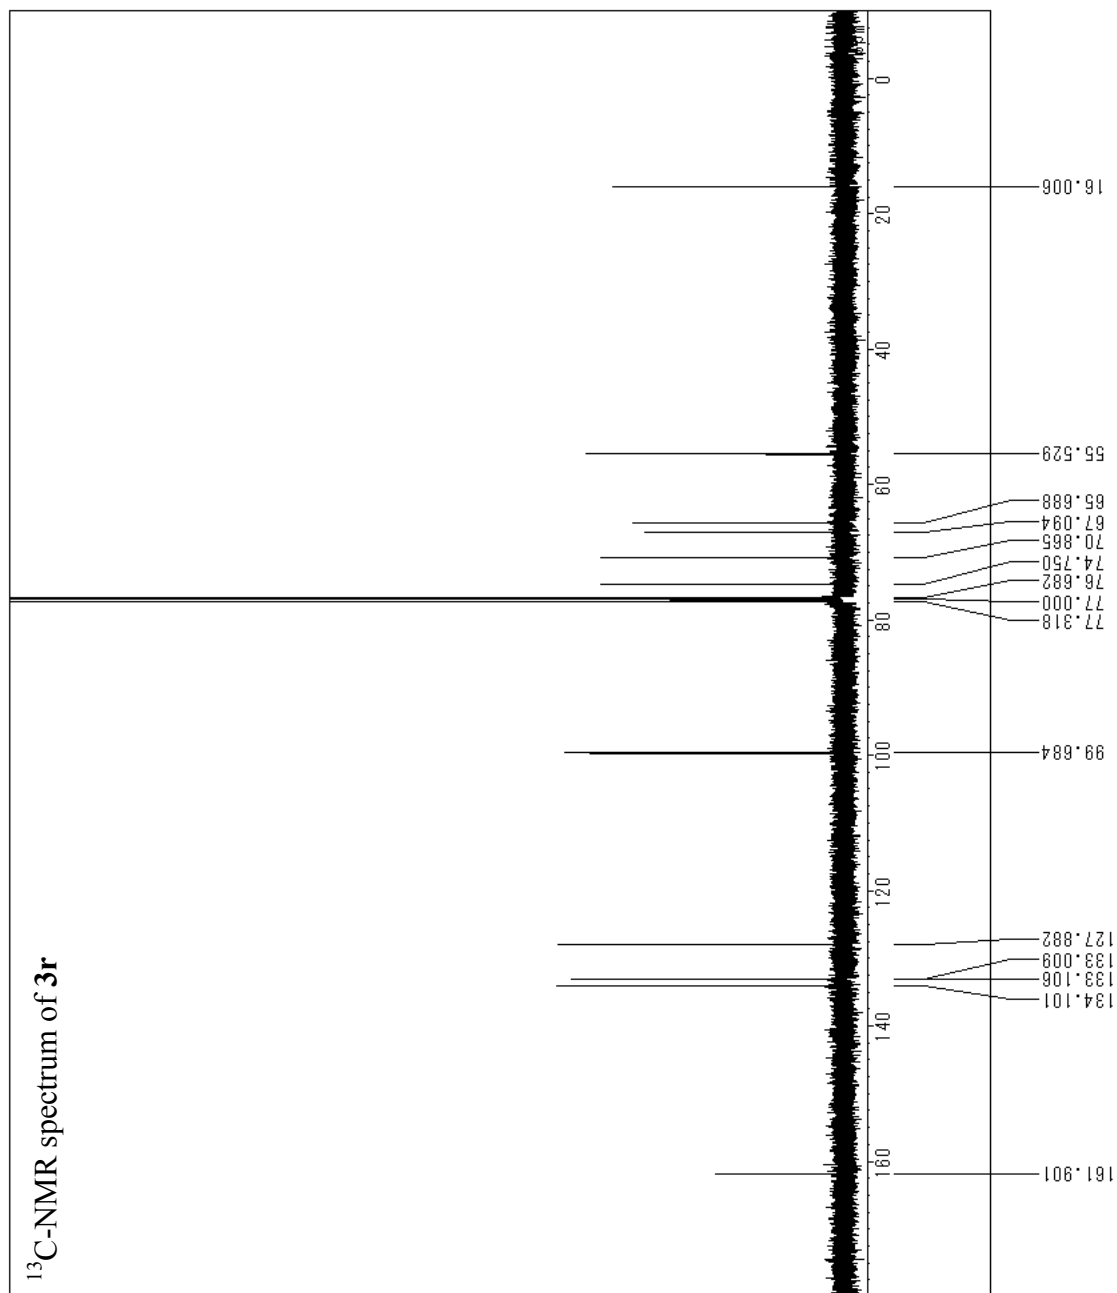

Comment TSV17033\_pure\_13C\_COSY\_2  
 0170918\_01  
 Date 2017/Sep/19  
 ObsNuc <sup>13</sup>C  
 ExMode CARBON\_001  
 ObsFreq 100.45 MHz  
 Scan 512  
 AcqTime 1.3831 s  
 Acc. Interval 3.3831 s  
 Spinning 20.0 Hz  
 Temperature 25.0 °C  
 Solvent cdcl<sub>3</sub>

Methyl 3-*O*-acetyl- $\alpha$ -L-fucopyranoside (**3s**)

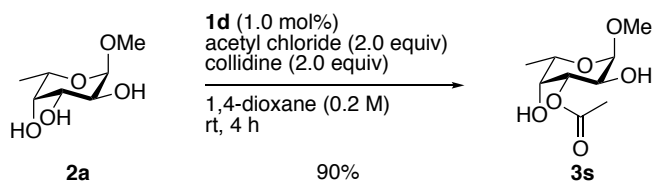

$^1\text{H}$ -NMR spectrum (crude reaction mixture in the presence of catalyst **1d**)

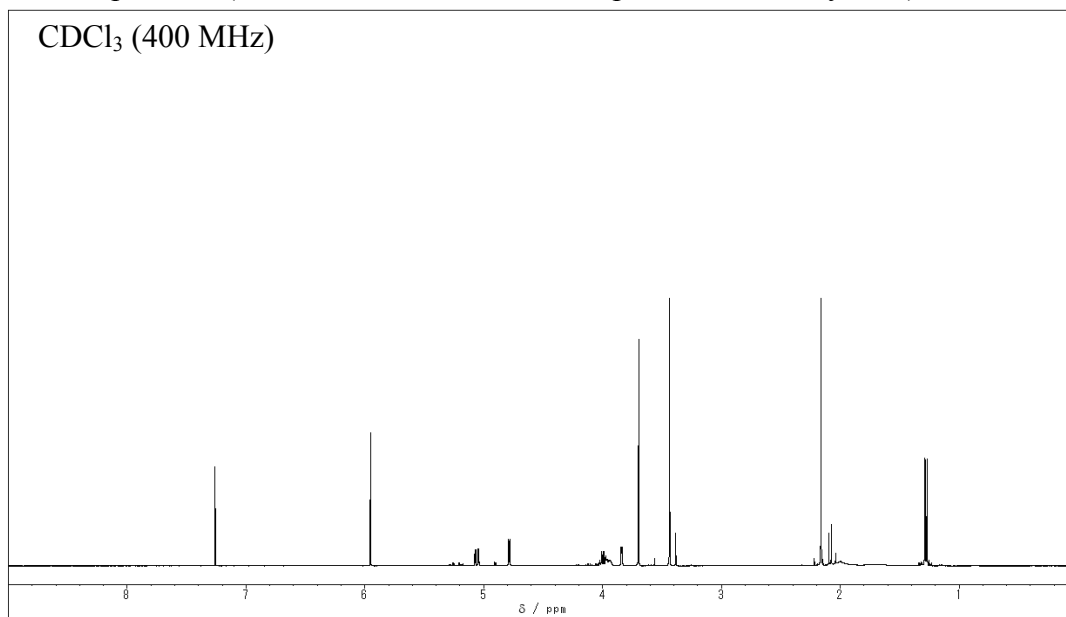

$^1\text{H}$ -NMR spectrum (crude reaction mixture in the absence of catalyst **1d**)

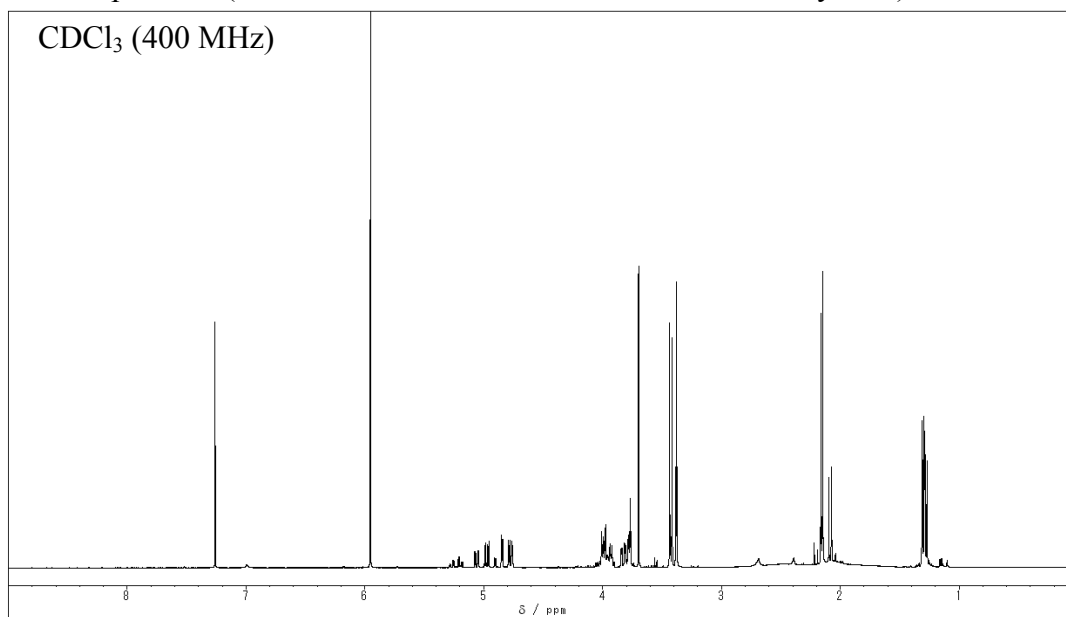

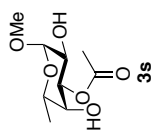

<sup>1</sup>H-NMR spectrum of **3s**

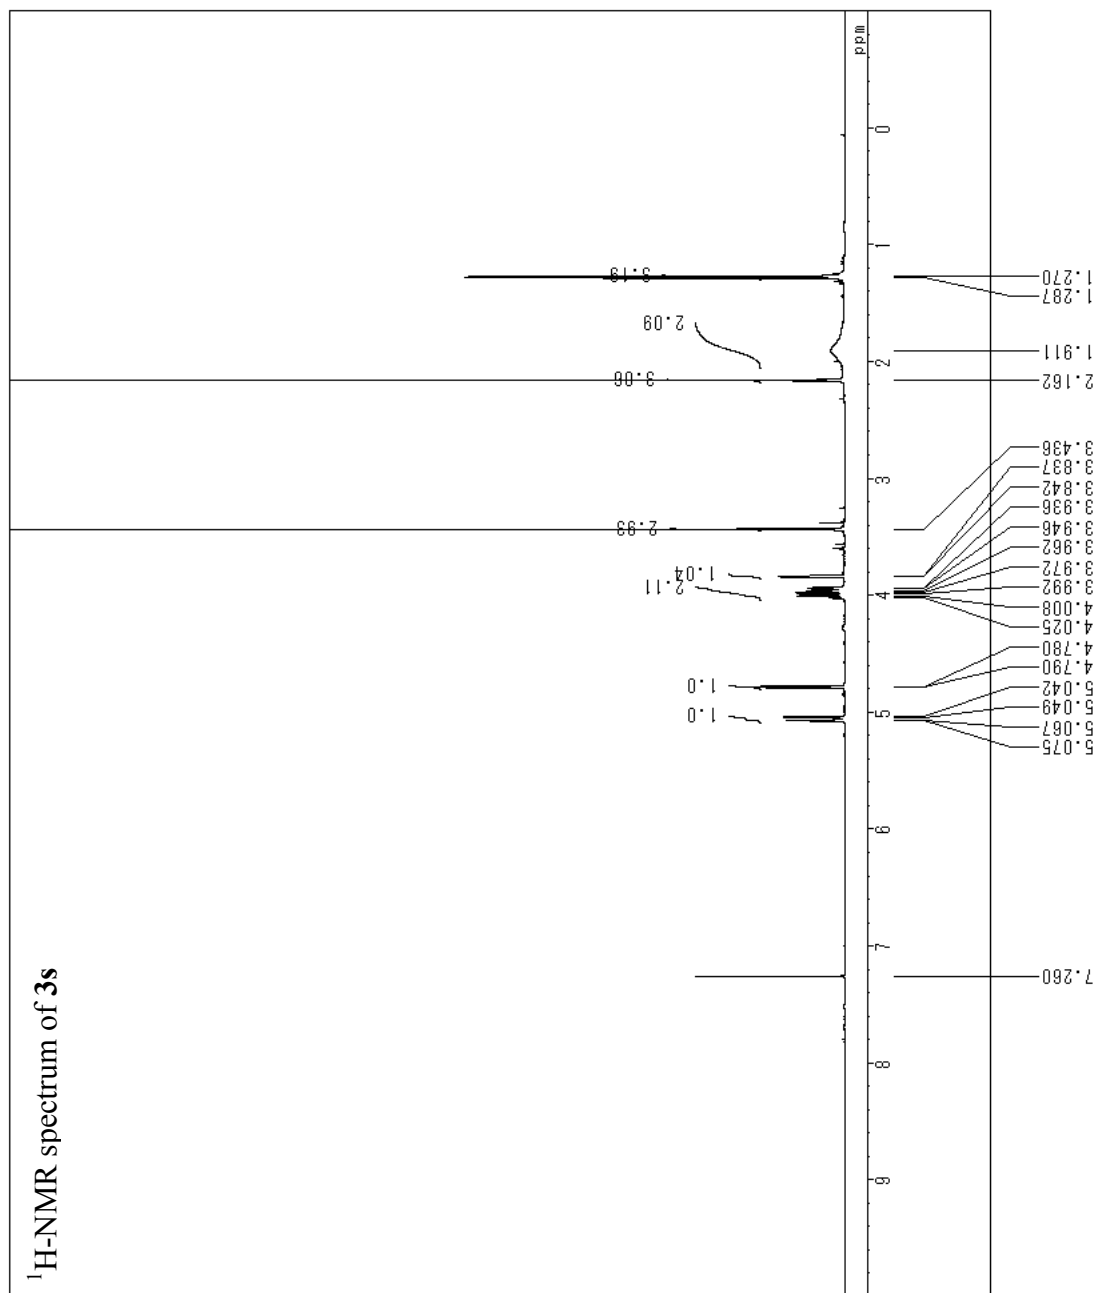

Comment TSV18020\_pure\_13C\_COSY\_2  
 0171003\_01  
 Date 2017/Oct/03  
 ObsNuc <sup>1</sup>H  
 ExMode PROTON\_001  
 ObsFreq 399.45 MHz  
 Scan 16  
 AcqTime 2.589 s  
 Acc. Interval 5.589 s  
 Spinning 16.0 Hz  
 Temperature 25.0 °C  
 Solvent cdcl<sub>3</sub>



$^1\text{H}$ - $^1\text{H}$  COSY spectrum of **3s**

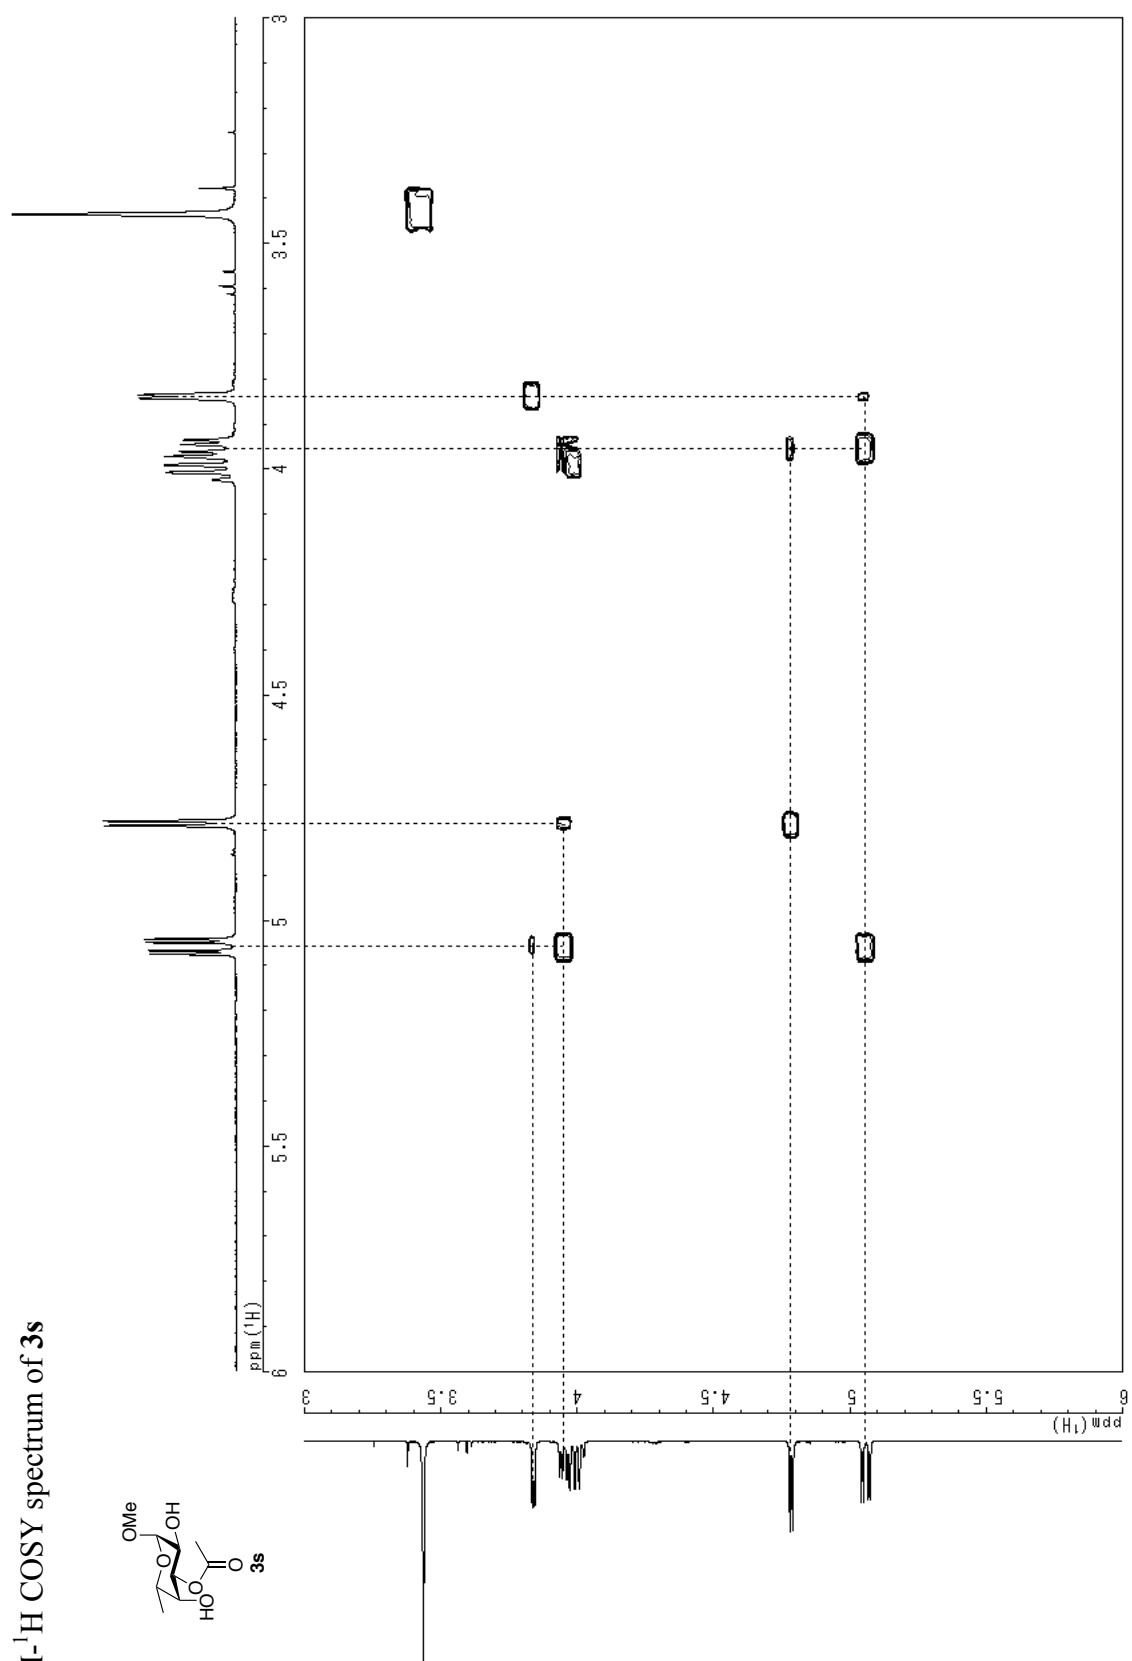

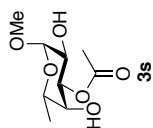

<sup>13</sup>C-NMR spectrum of **3s**

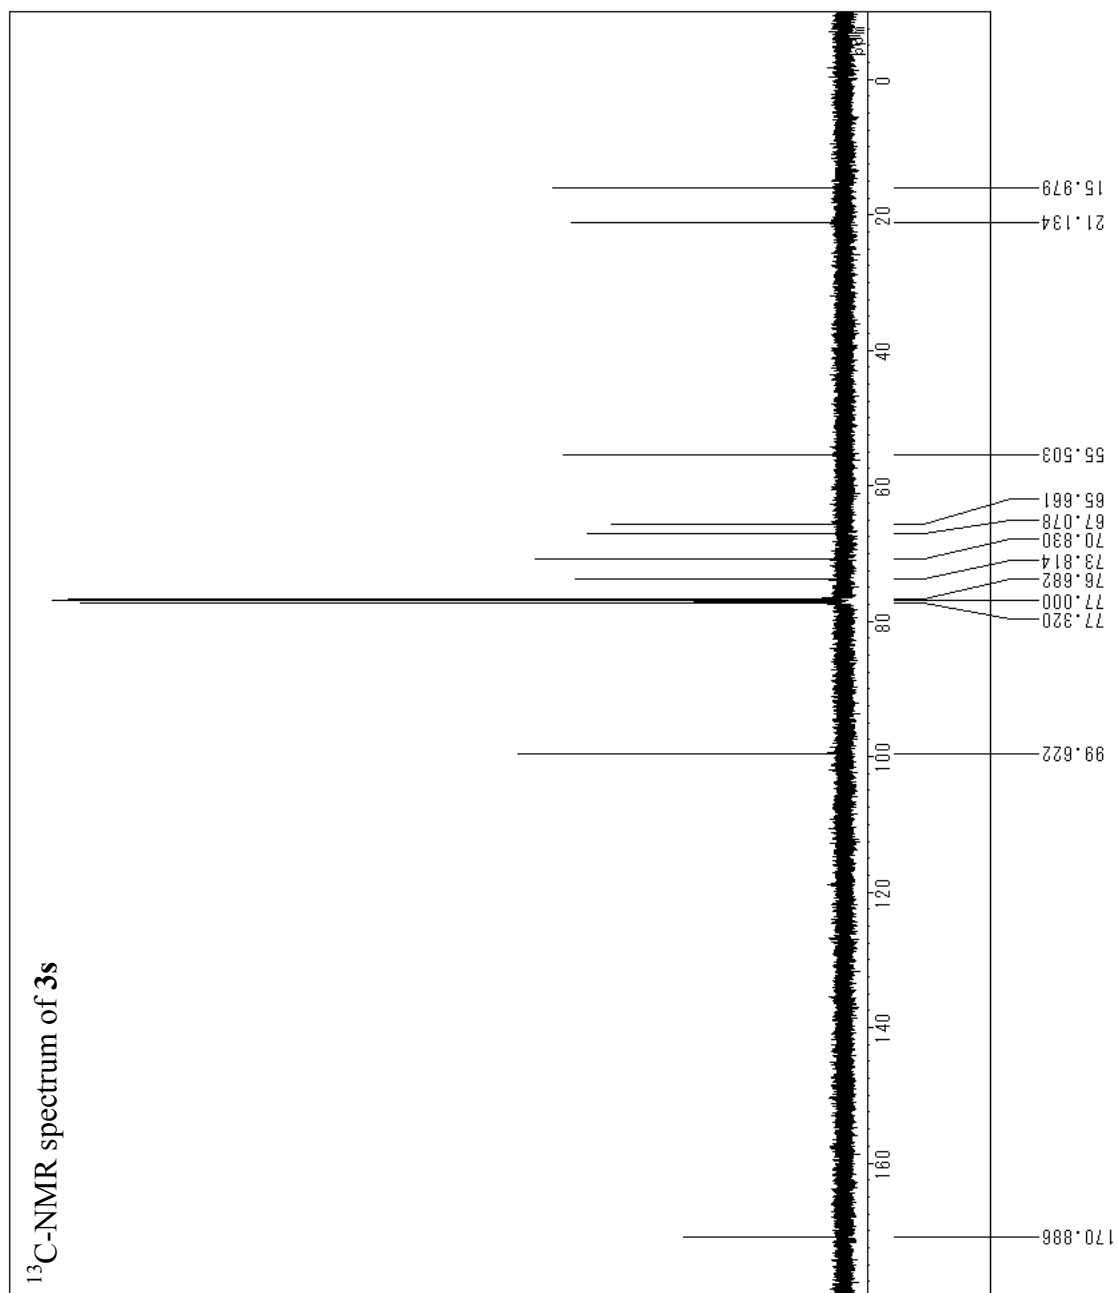

Comment TSV18020\_pure\_13C\_COSY\_2  
 0171003\_01  
 Date 2017/Oct/03  
 ObsNuc <sup>13</sup>C  
 ExMode CARBON\_001  
 ObsFreq 100.45 MHz  
 Scan 512  
 AcqTime 1.3631 s  
 Acc. Interval 3.3631 s  
 Spinning 20.0 Hz  
 Temperature 25.0 °C  
 Solvent cdcl<sub>3</sub>

Methyl 2-*O*-acetyl- $\alpha$ -L-fucopyranoside (SI-7)

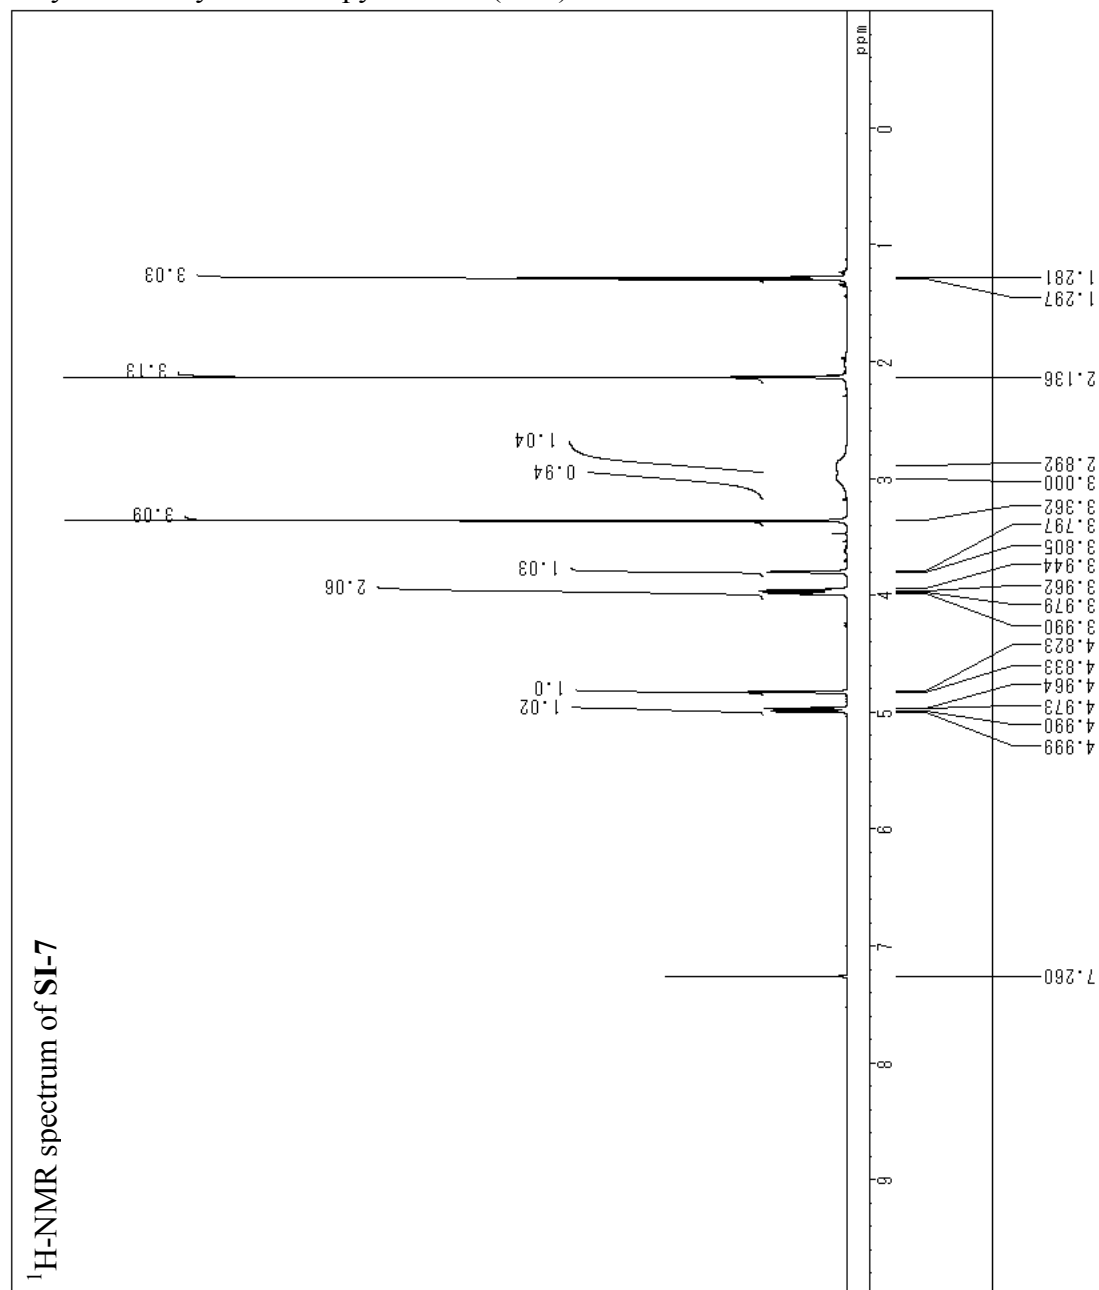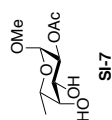

Comment TSV25039\_pure\_13C\_COSY\_2  
0190210\_01  
Date 2019/Feb/10  
ObsNuc <sup>1</sup>H  
ExMode PROTON\_001  
ObsFreq 399.45 MHz  
Scan 16  
AcqTime 2.589 s  
Acc. Interval 5.589 s  
Spinning 16.0 Hz  
Temperature 25.0 °C  
Solvent cdcl<sub>3</sub>

$^1\text{H}$ - $^1\text{H}$  COSY spectrum of **SI-7**

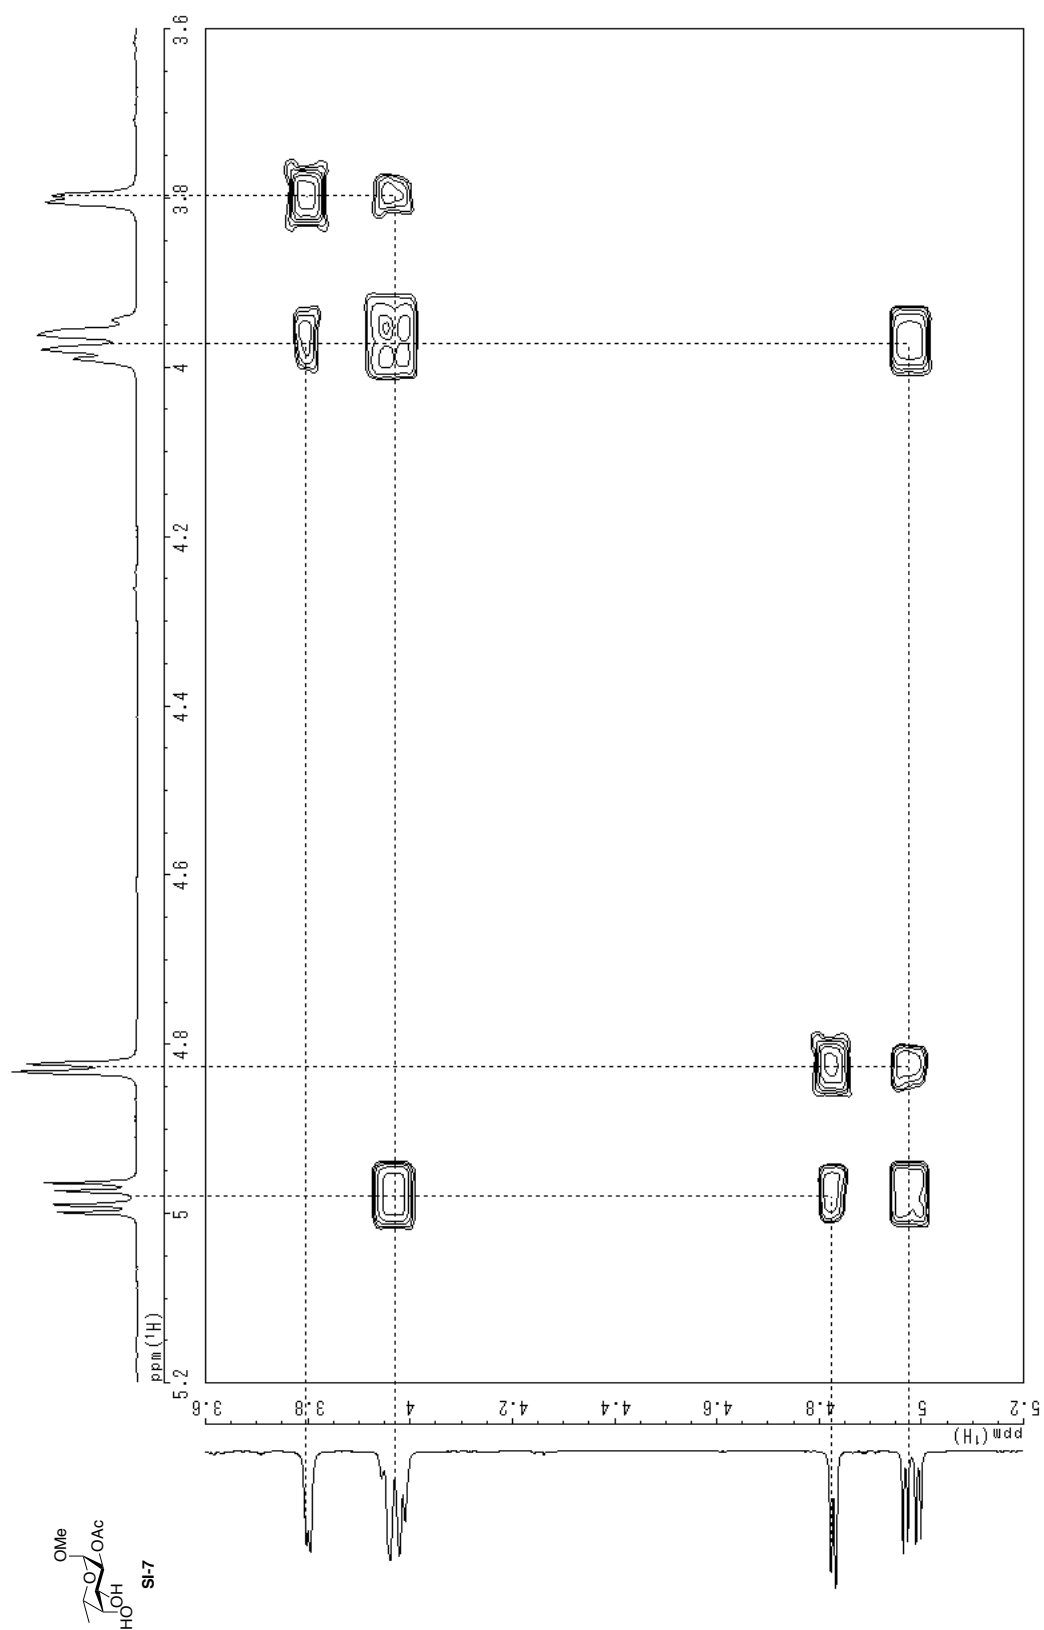

<sup>13</sup>C-NMR spectrum of SI-7

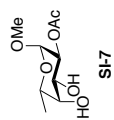

Comment TSV25039\_pure\_13C\_COSY\_2  
0190210\_01  
Date 2019/Feb/10  
ObsNuc <sup>13</sup>C  
ExMode CARBON\_001  
ObsFreq 100.45 MHz  
Scan 512  
AcqTime 1.3831 s  
Acc. Interval 3.3831 s  
Spinning 20.0 Hz  
Temperature 25.0 °C  
Solvent cdcl<sub>3</sub>

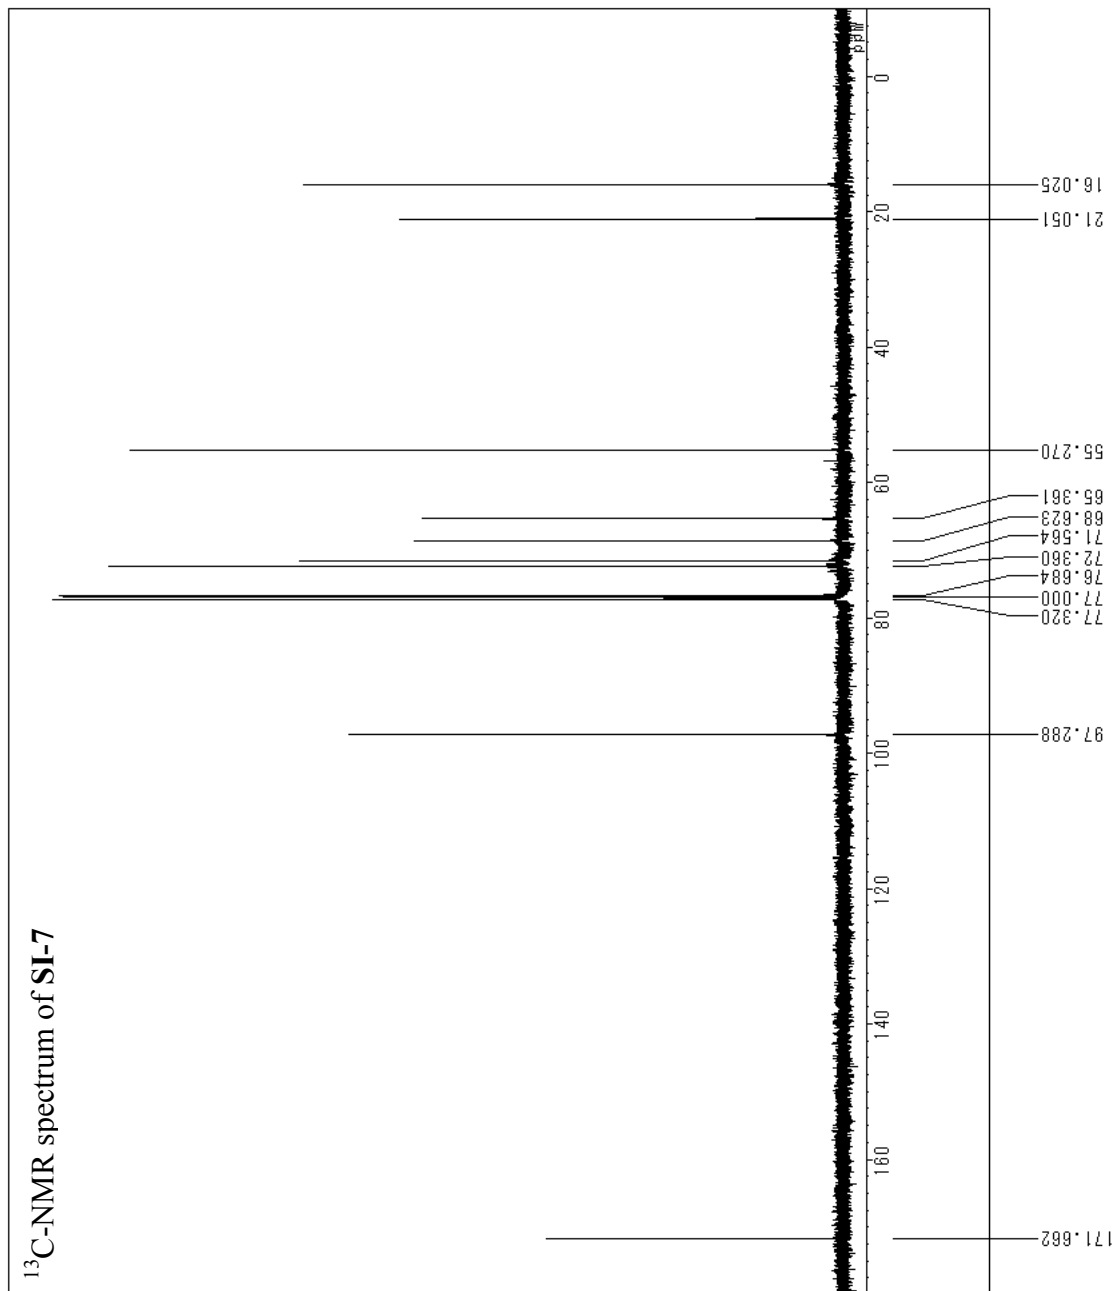

Methyl 2,3-*O*-diacetyl- $\alpha$ -L-fucopyranoside (**SI-8**)

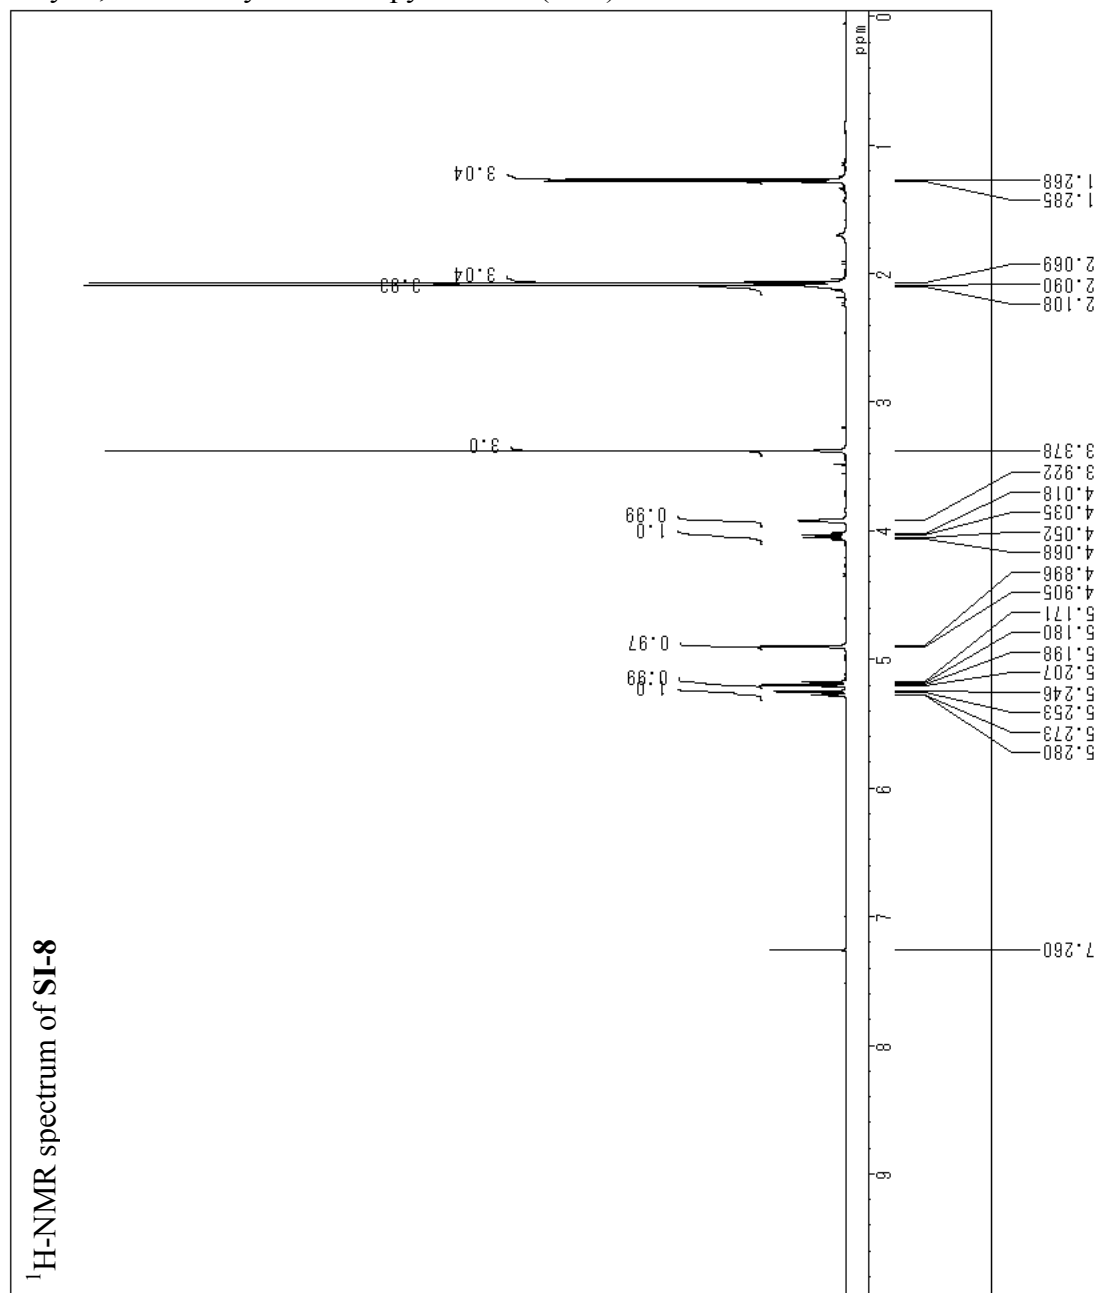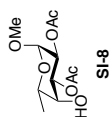

Comment TSV25040\_pure\_13C\_COSY\_2  
 0180213\_01  
 Date 2019/Feb/13  
 ObsNuc <sup>1</sup>H  
 ExMode PROTON\_001  
 ObsFreq 399.45 MHz  
 Scan 16  
 AcqTime 2.589 s  
 Acc. Interval 5.589 s  
 Spinning 16.0 Hz  
 Temperature 25.0 °C  
 Solvent cdcl<sub>3</sub>

$^1\text{H}$ - $^1\text{H}$  COSY spectrum of **SI-8**

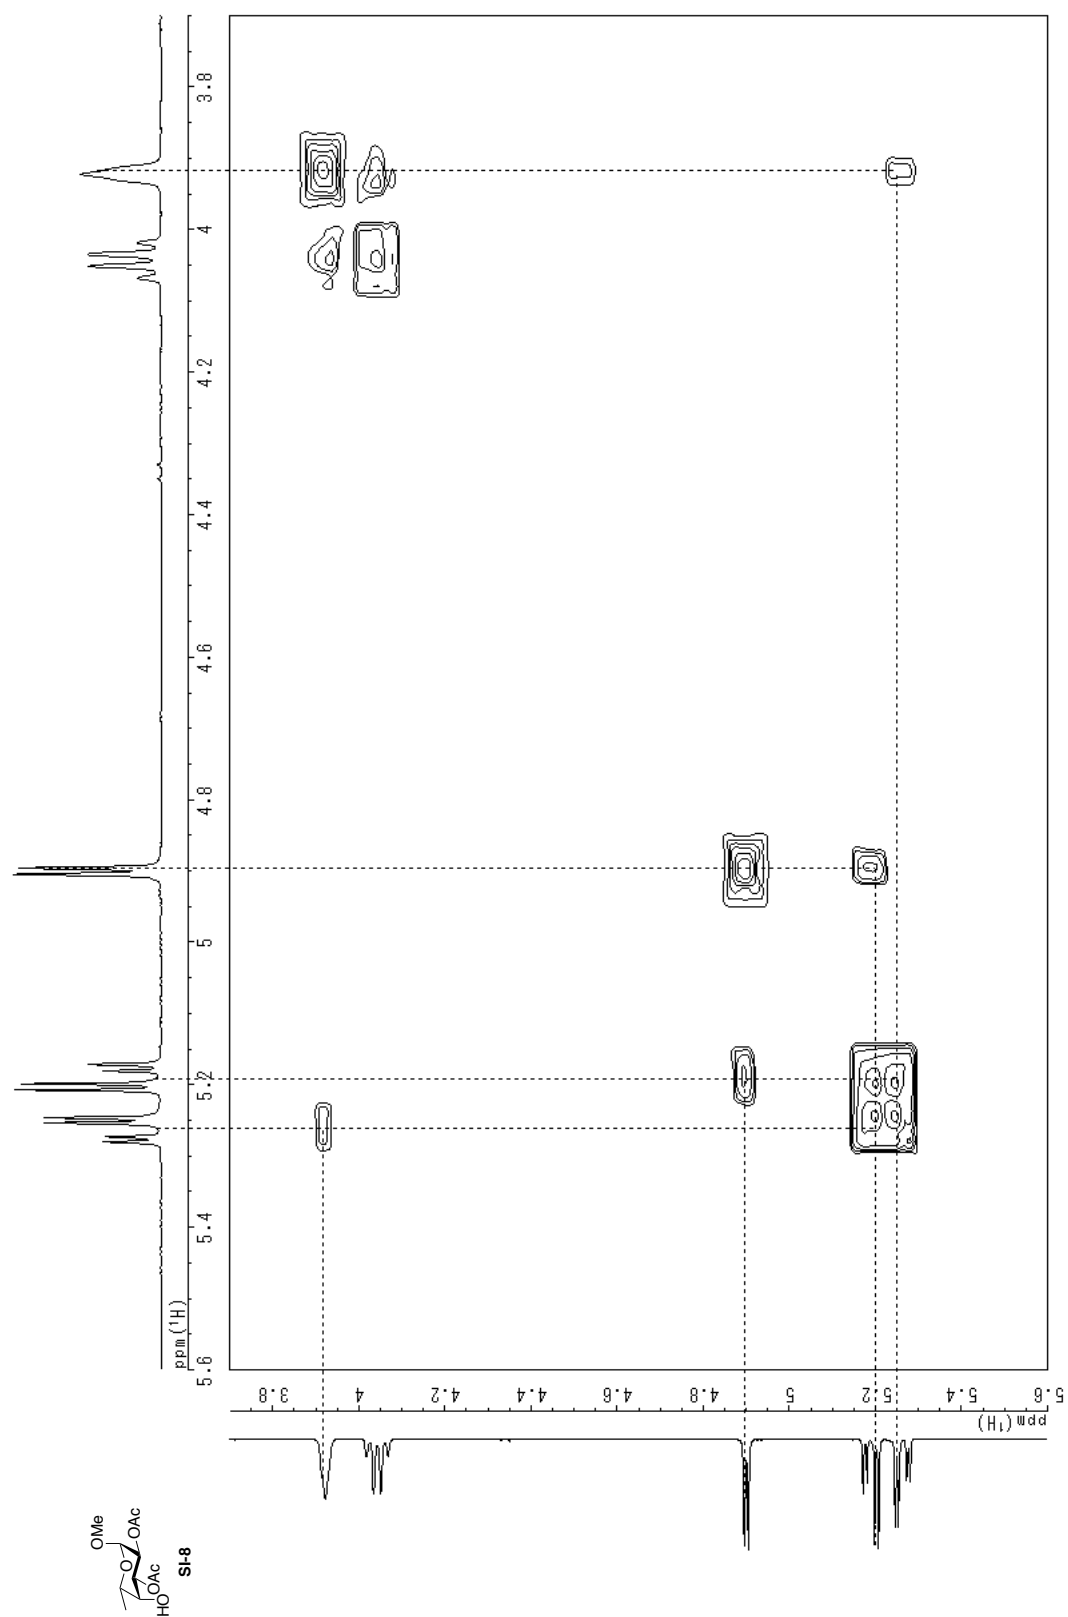

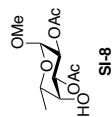

# <sup>13</sup>C-NMR spectrum of SI-8

Comment TSV25040\_pure\_13C\_COSY\_2  
 0190213\_01  
 Date 2019/Feb/13  
 ObsNuc <sup>13</sup>C  
 ExMode CARBON\_001  
 ObsFreq 100.45 MHz  
 Scan 512  
 AcqTime 1.3831 s  
 Acc. Interval 3.3831 s  
 Spinning 20.0 Hz  
 Temperature 25.0 °C  
 Solvent cdcl<sub>3</sub>

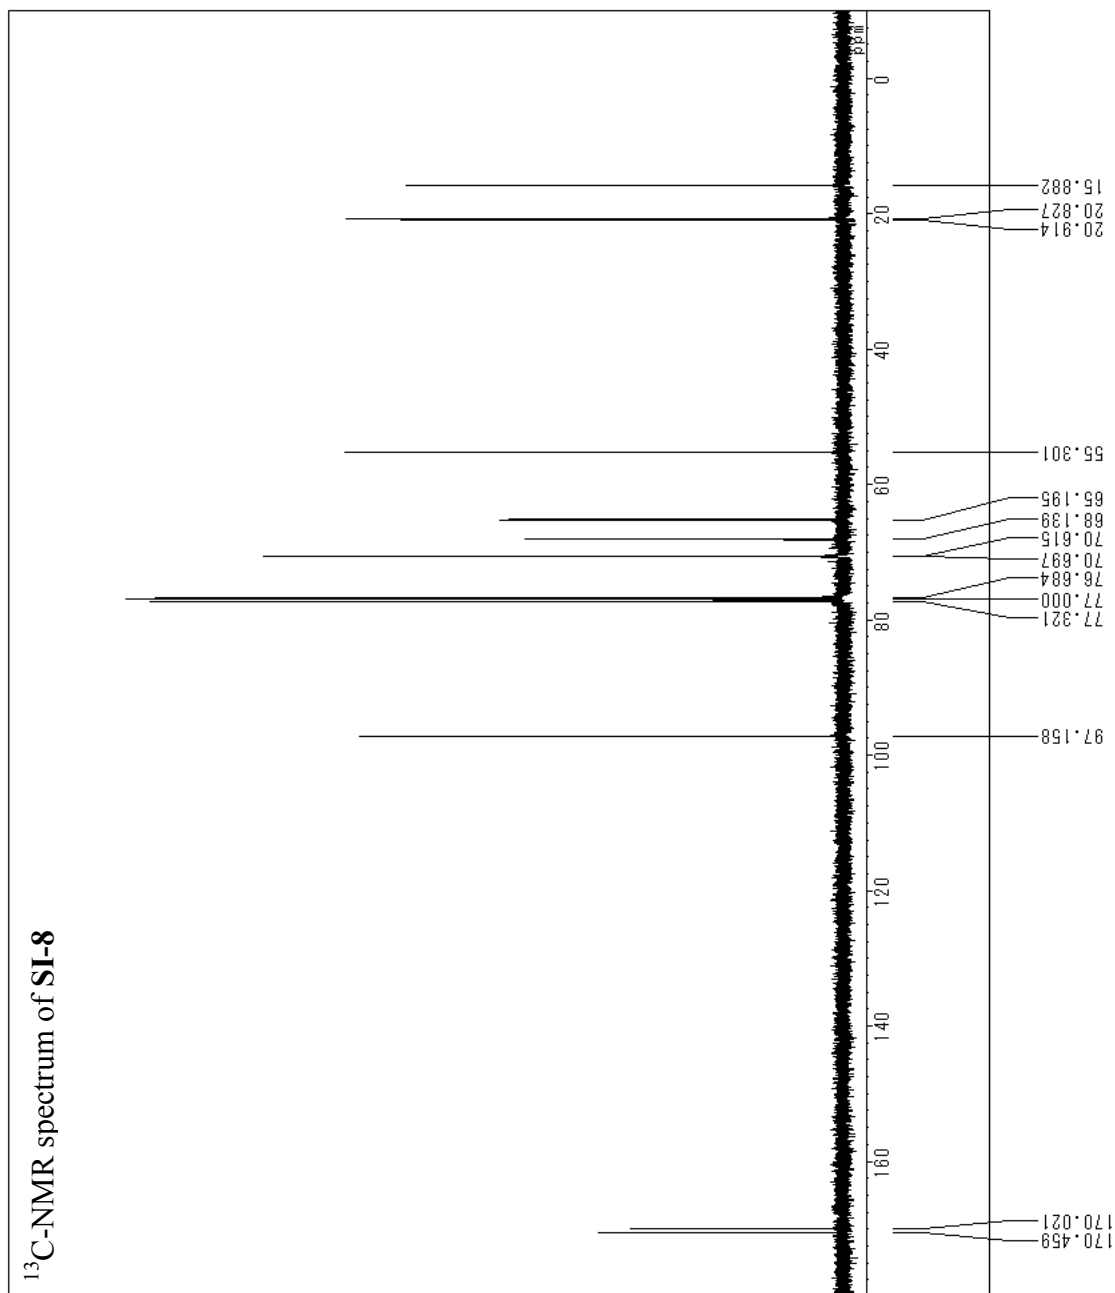



Methyl 3-*O*-butyryl- $\alpha$ -L-fucopyranoside (**3t**)

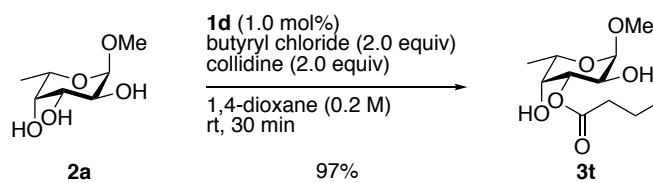

$^1\text{H}$ -NMR spectrum (crude reaction mixture in the presence of catalyst **1d**)

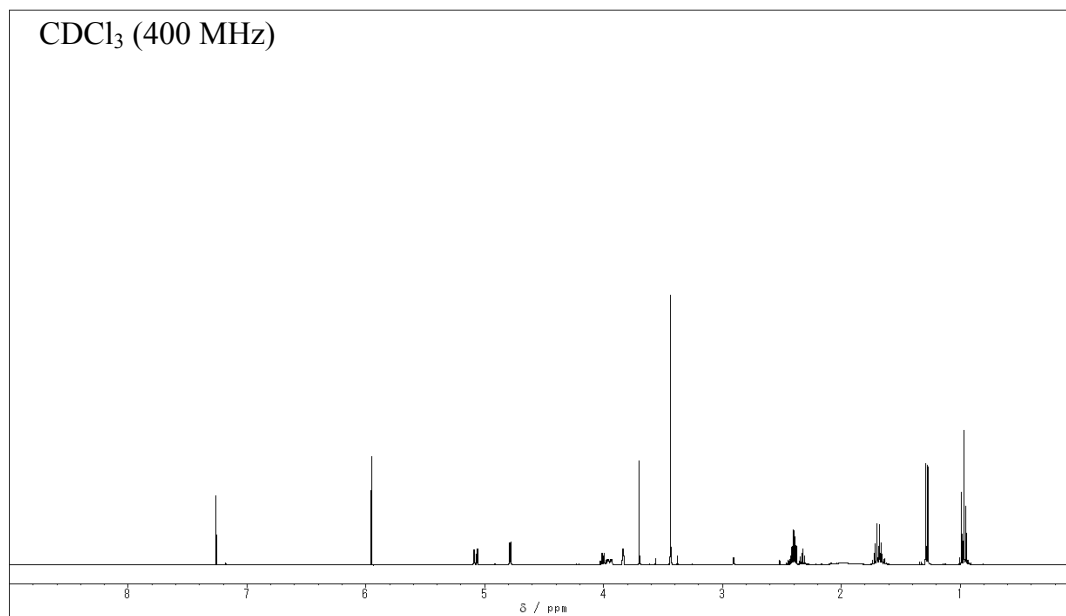

$^1\text{H}$ -NMR spectrum (crude reaction mixture in the absence of catalyst **1d**)

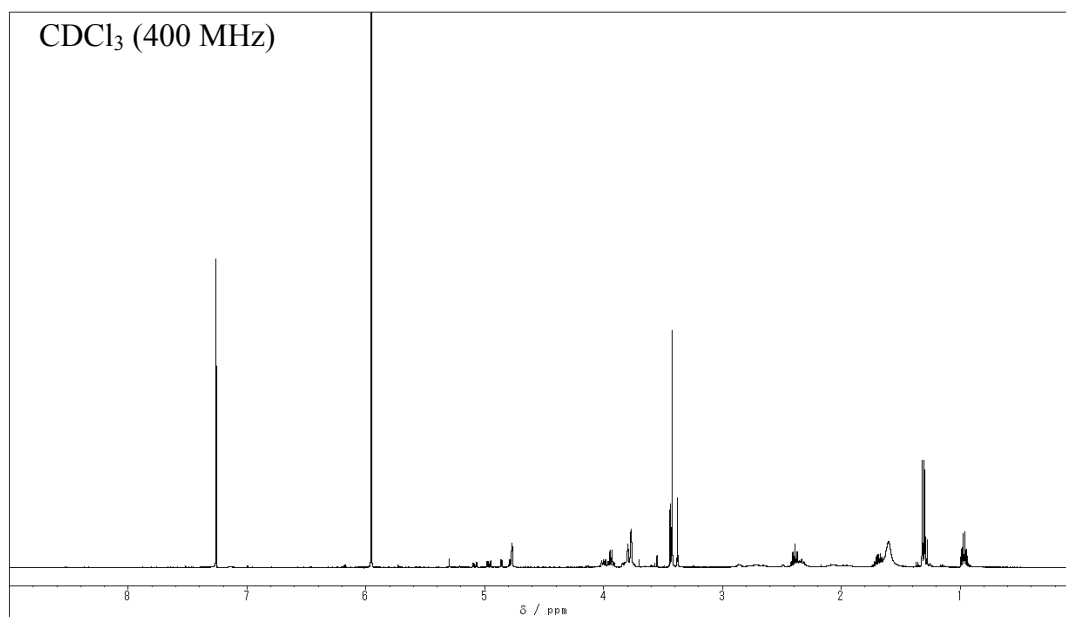

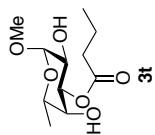

Comment TSV18035\_pure\_20171011\_0  
 1  
 Date 2017/Oct/11  
 ObsNuc <sup>1</sup>H  
 ExMode PROTON\_001  
 ObsFreq 300.45 MHz  
 Scan 16  
 AcqTime 2.589 s  
 Acc. Interval 5.589 s  
 Spinning 16.0 Hz  
 Temperature 25.0 °C  
 Solvent cdcl<sub>3</sub>

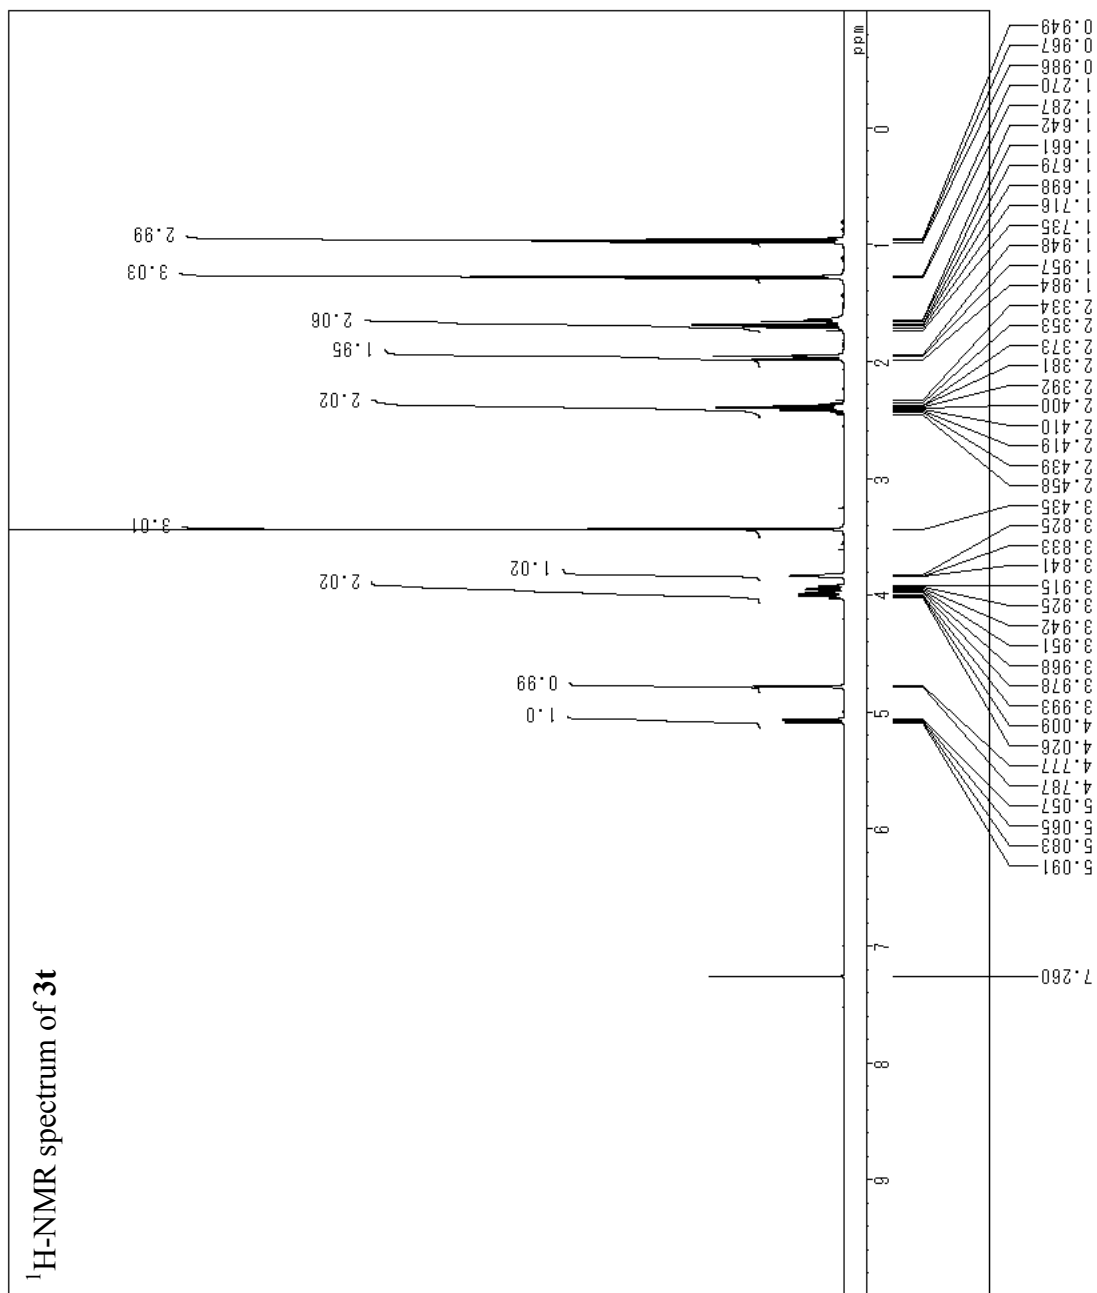

$^1\text{H}$ - $^1\text{H}$  COSY spectrum of **3t**

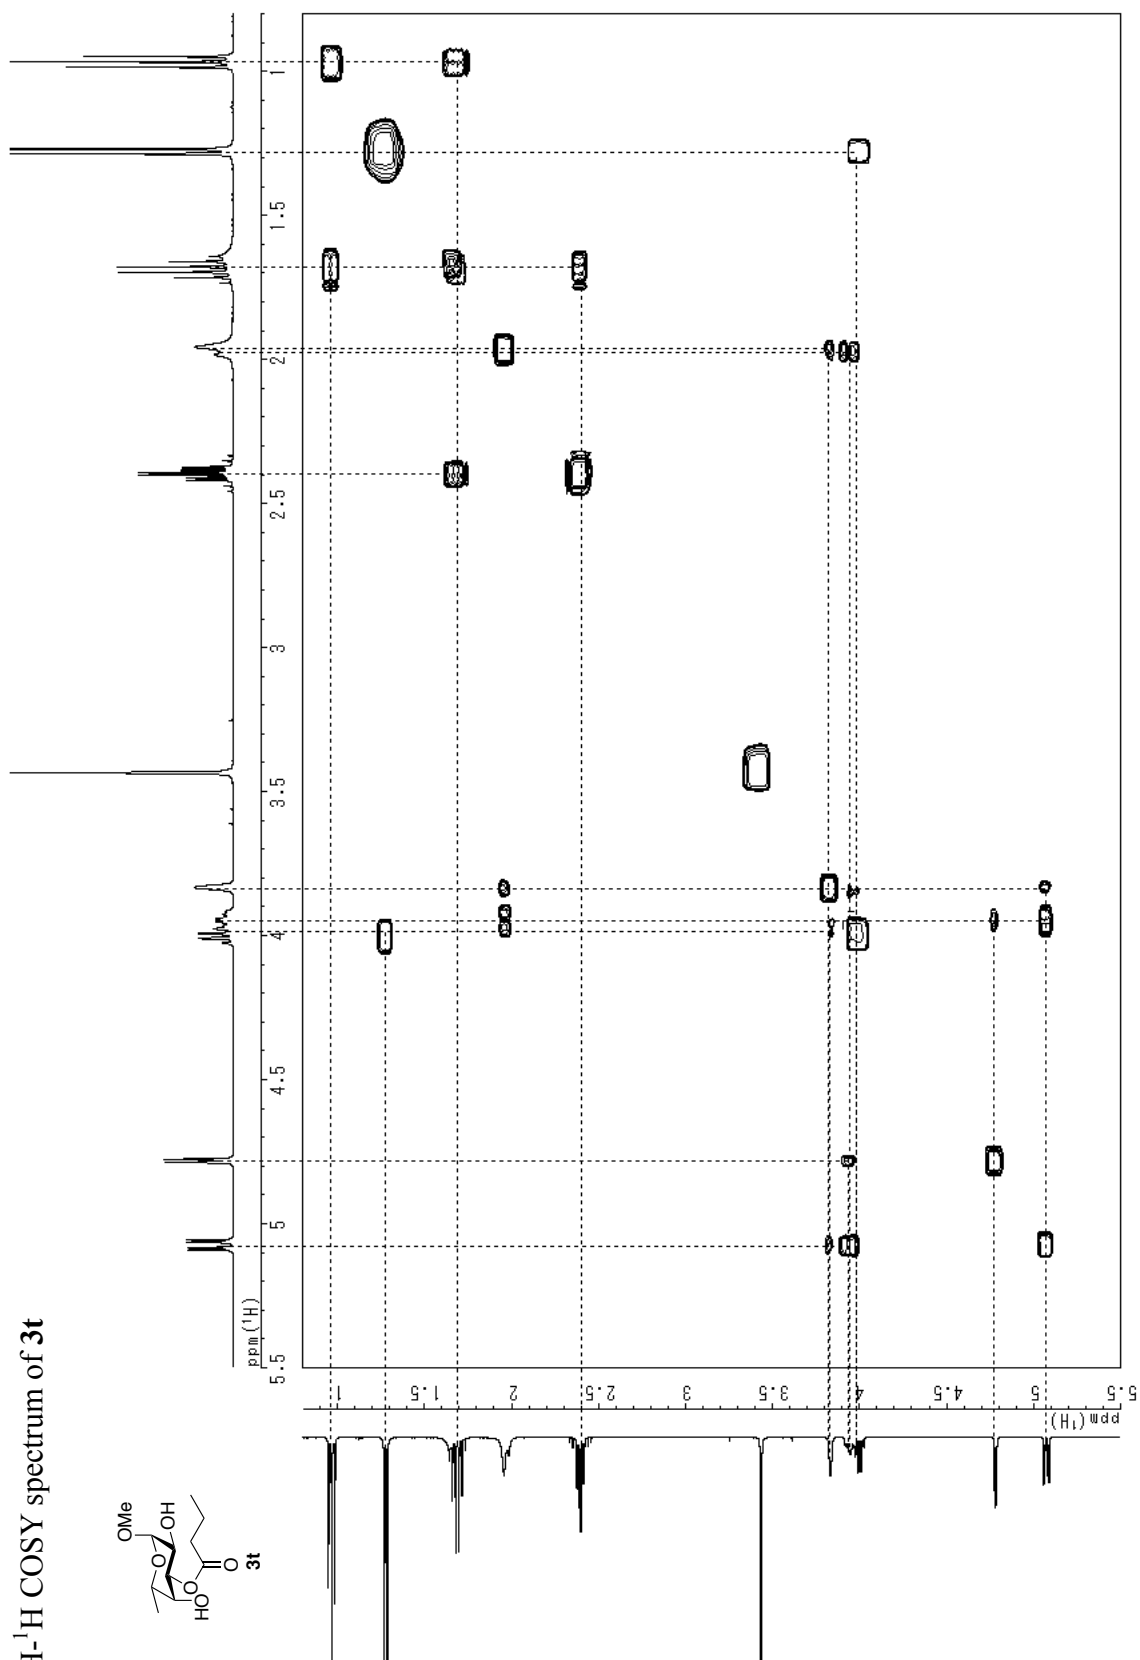

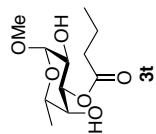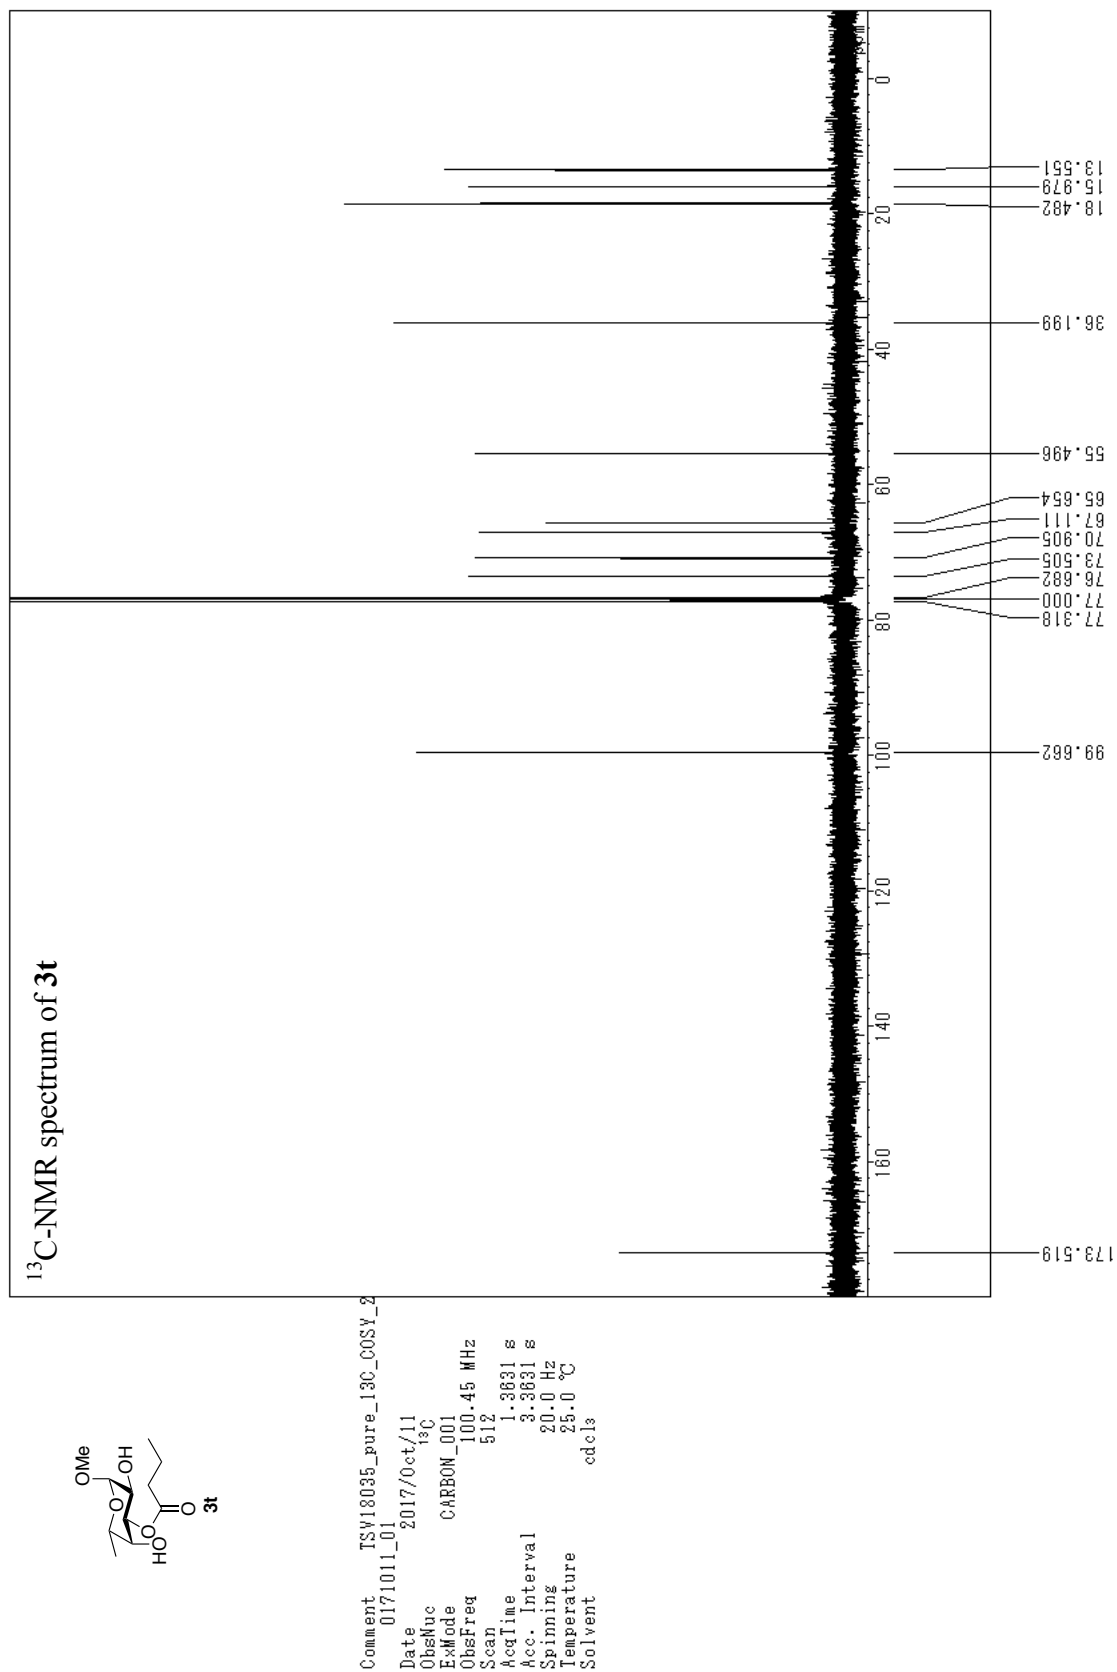

Methyl 3-*O*-palmitoyl- $\alpha$ -L-fucopyranoside (**3u**)

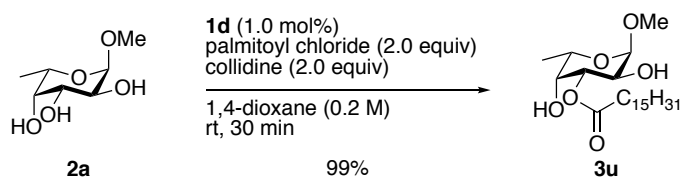

$^1\text{H}$ -NMR spectrum (crude reaction mixture in the presence of catalyst **1d**)

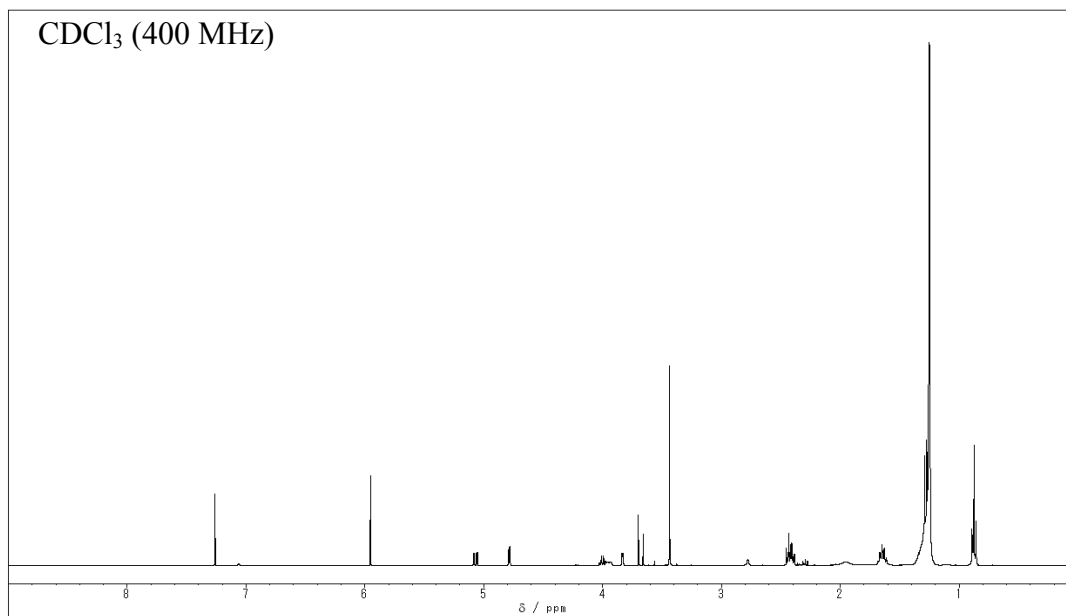

$^1\text{H}$ -NMR spectrum (crude reaction mixture in the absence of catalyst **1d**)

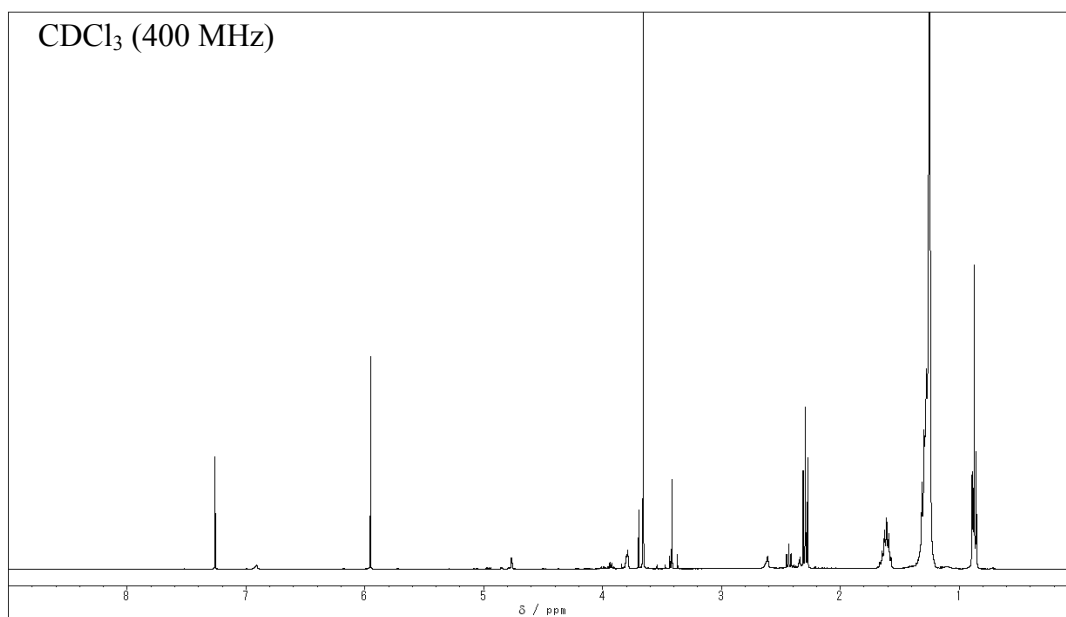

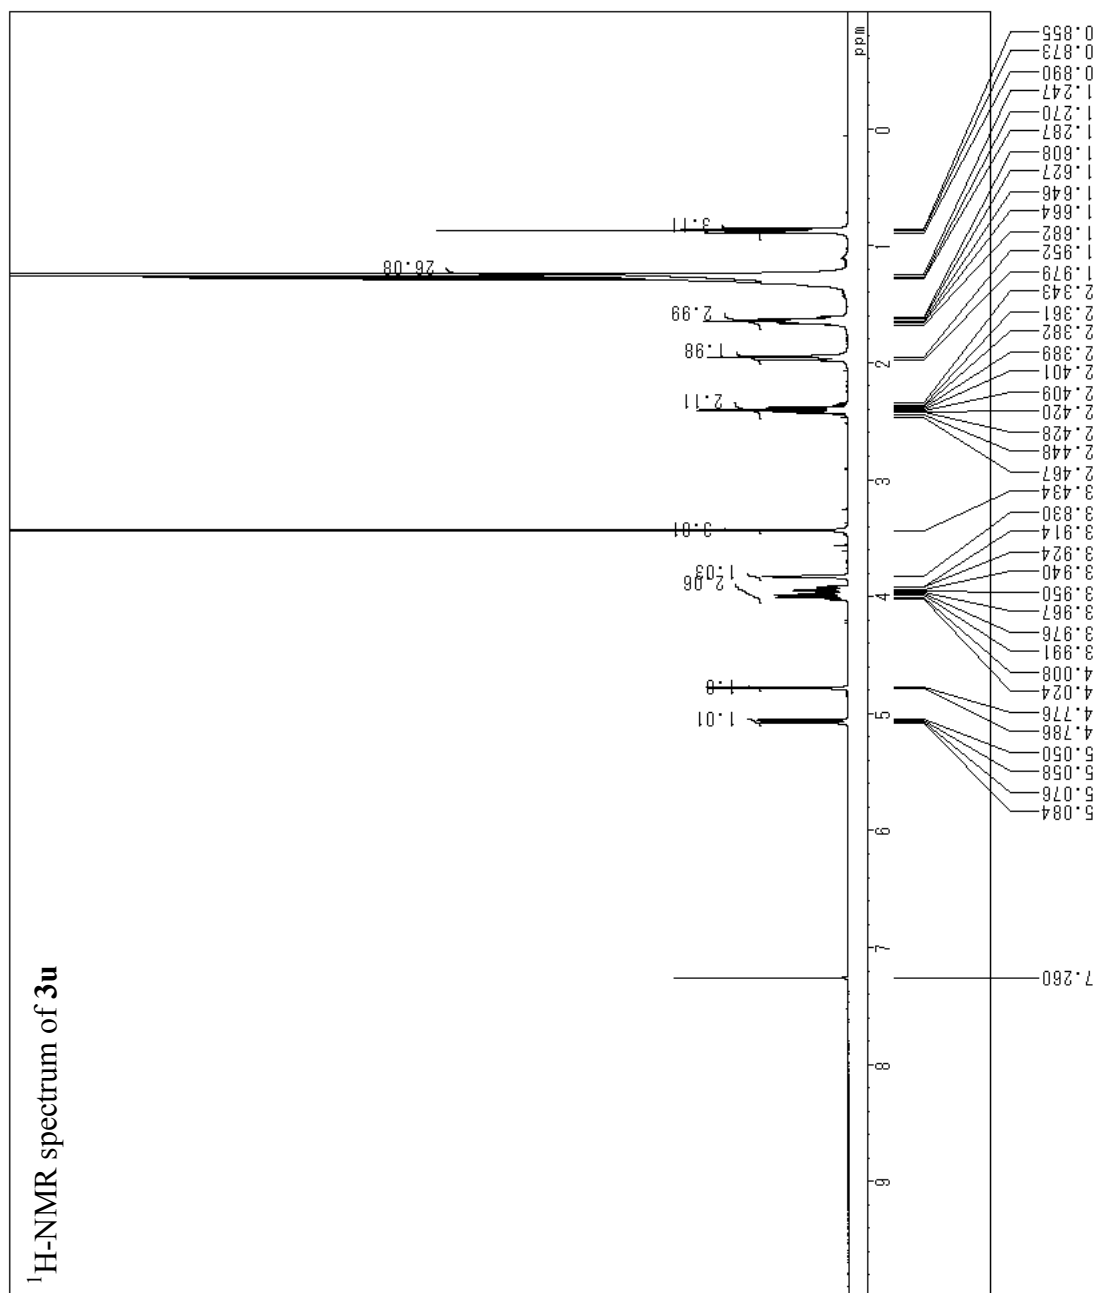

Comment TSV19006\_pure\_13C\_COSY\_2  
 0171016\_01  
 Date 2017/0ct/18  
 ObsNuc <sup>1</sup>H  
 ExMode PROTON\_001  
 ObsFreq 399.45 MHz  
 Scan 16  
 AcqTime 2.569 s  
 Acc. Interval 5.589 s  
 Spinning 18.0 Hz  
 Temperature 25.0 °C  
 Solvent cdcl<sub>3</sub>

$^1\text{H}$ - $^1\text{H}$  COSY spectrum of **3u**

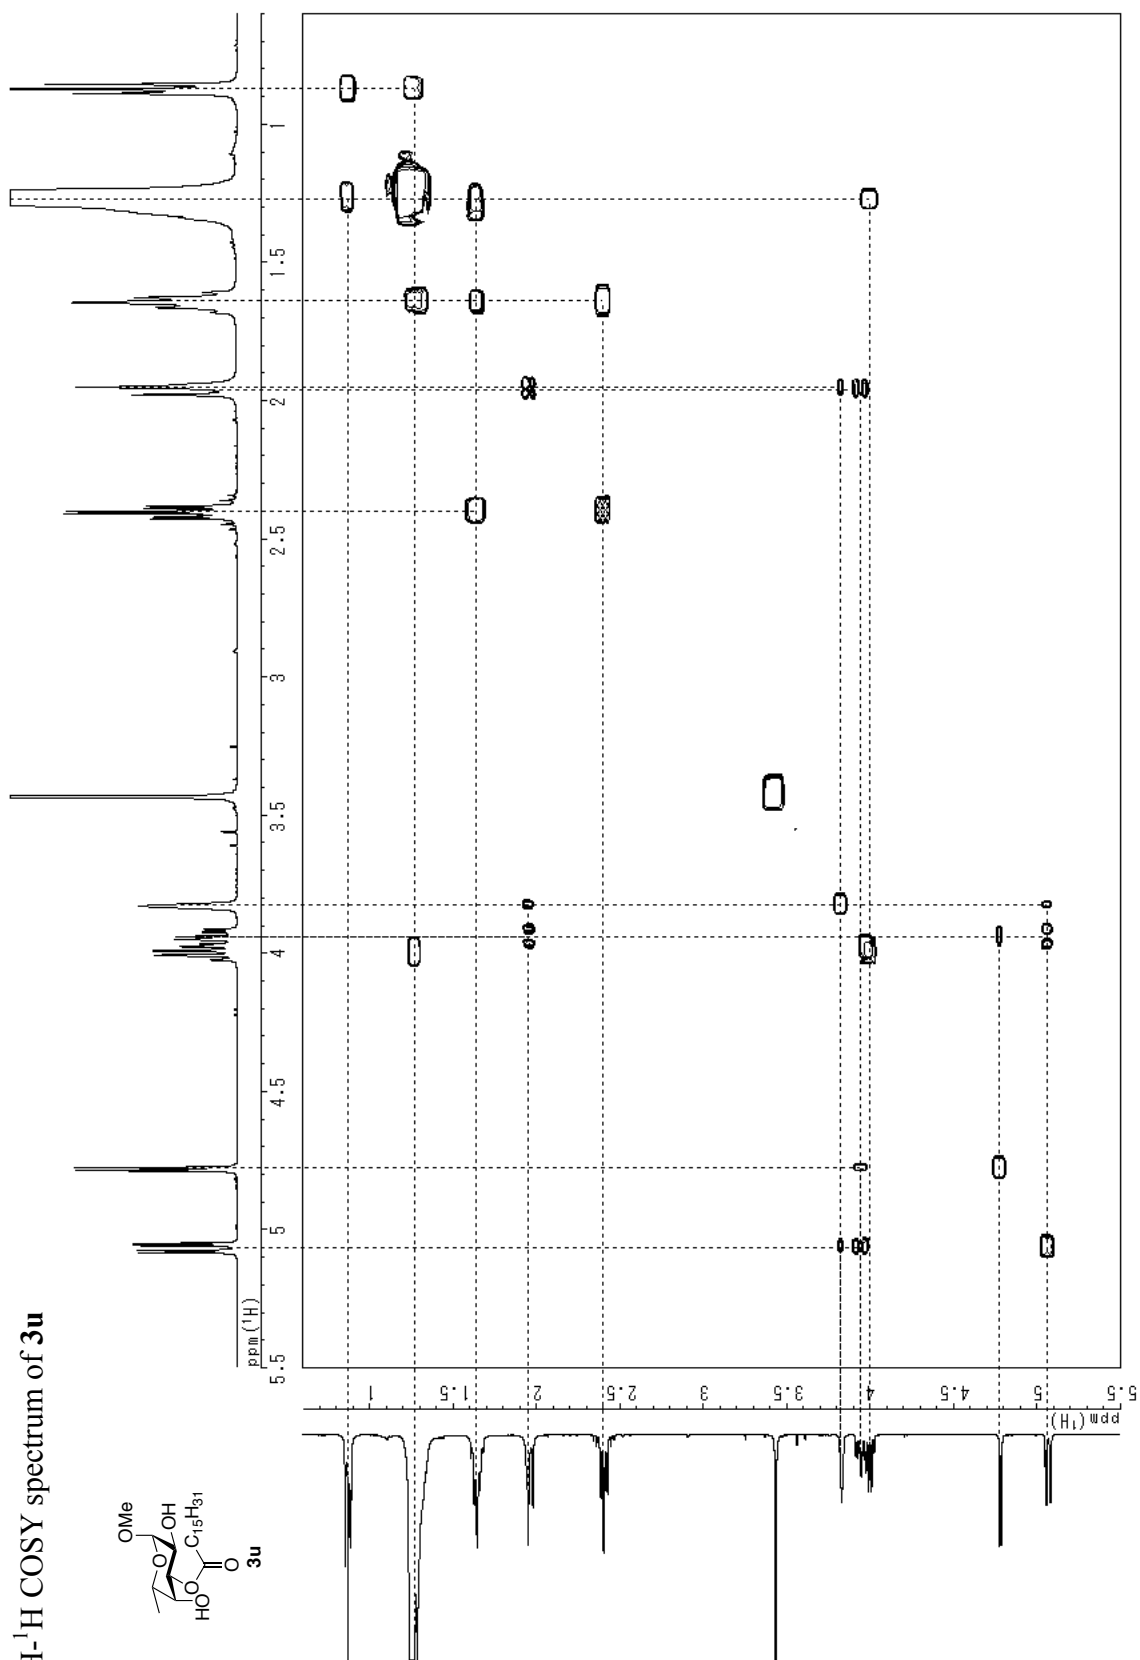

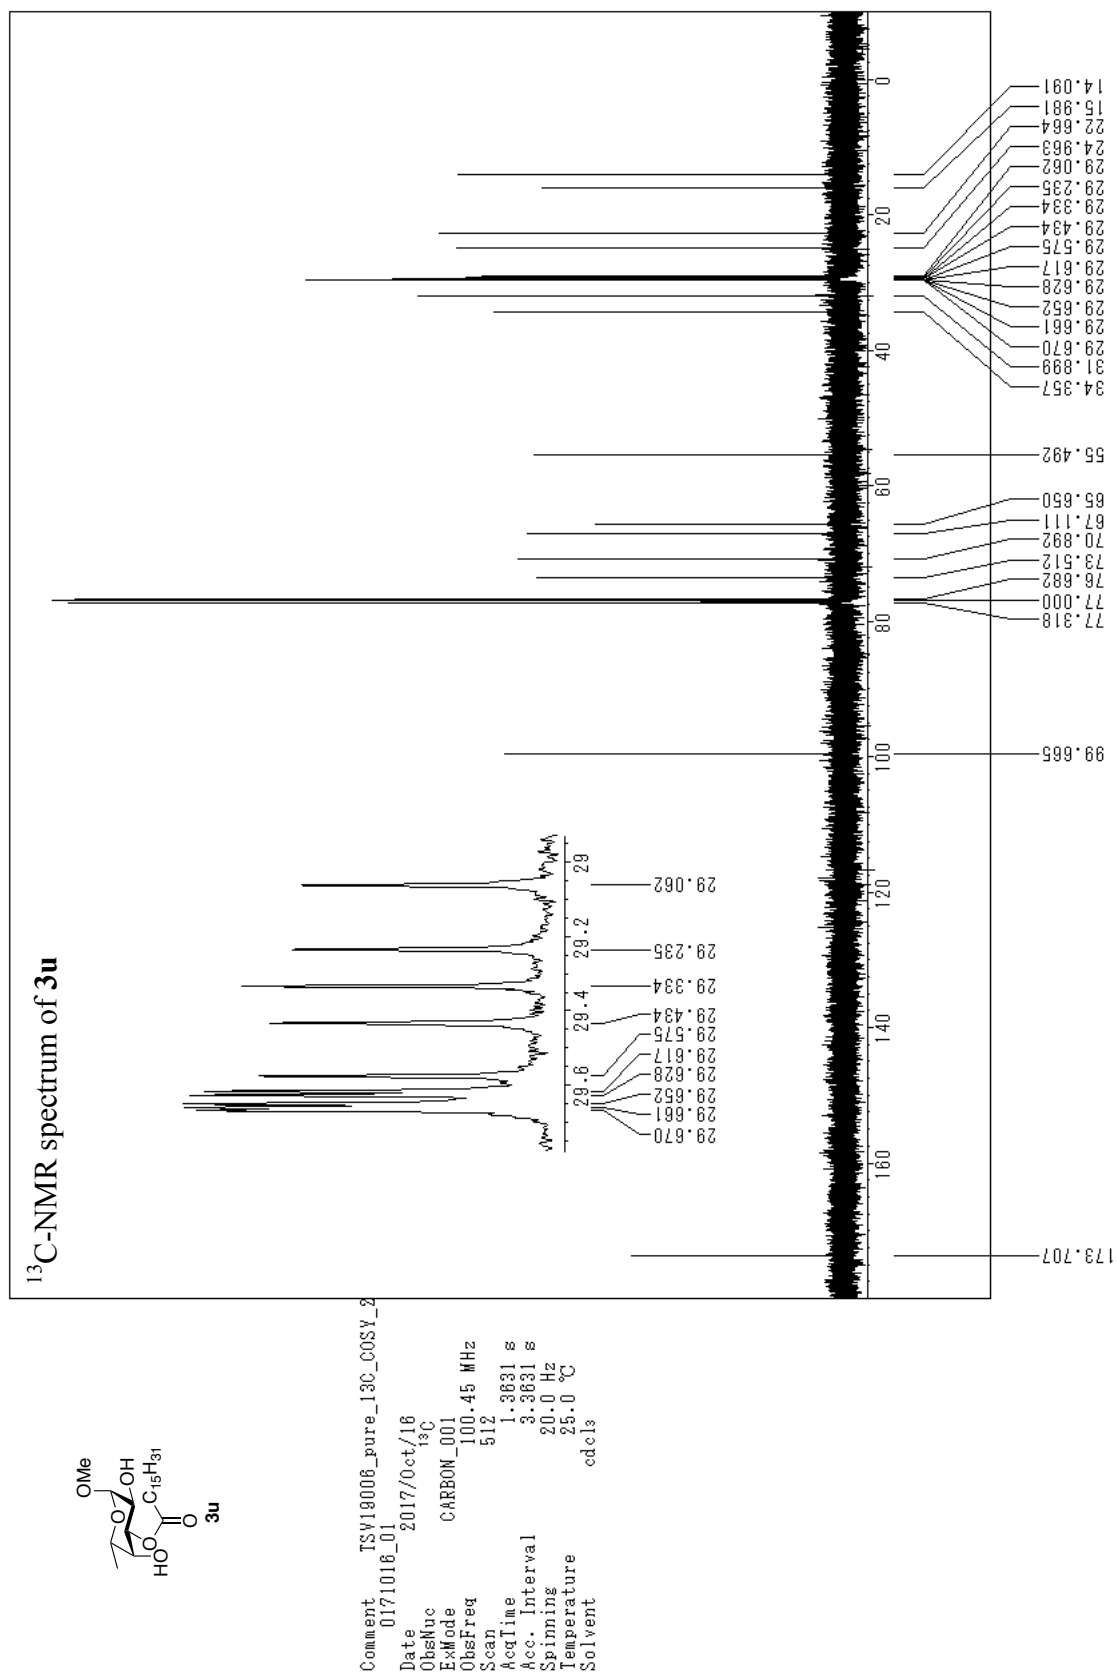



Methyl 3-*O*-oleoyl- $\alpha$ -L-fucopyranoside (**3v**)

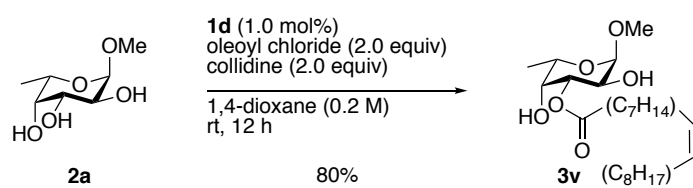

<sup>1</sup>H-NMR spectrum (crude reaction mixture in the presence of catalyst **1d**)

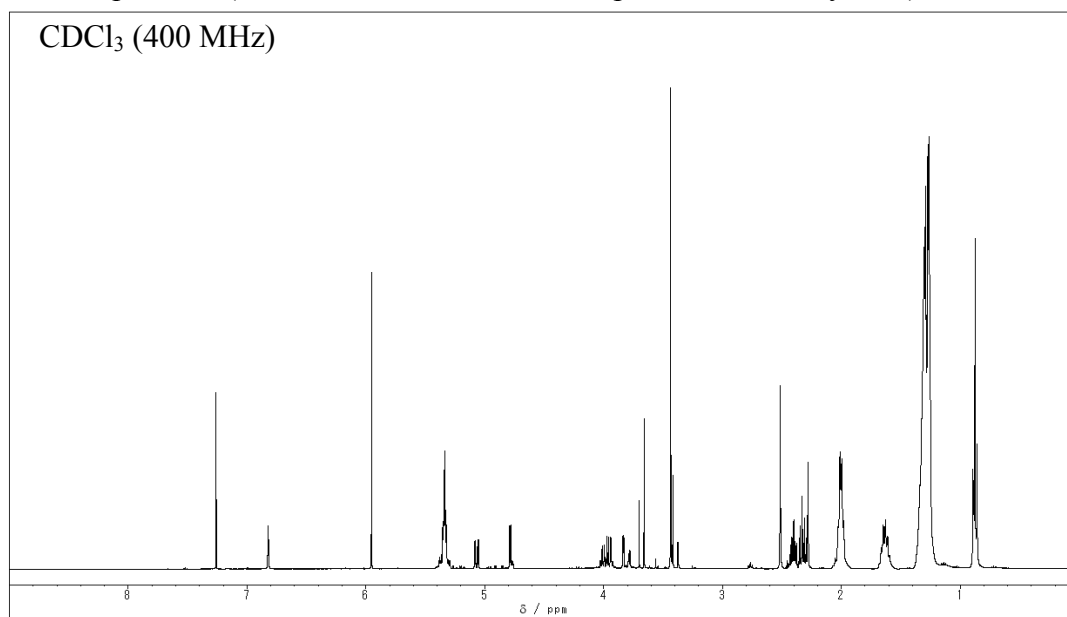

<sup>1</sup>H-NMR spectrum (crude reaction mixture in the absence of catalyst **1d**)

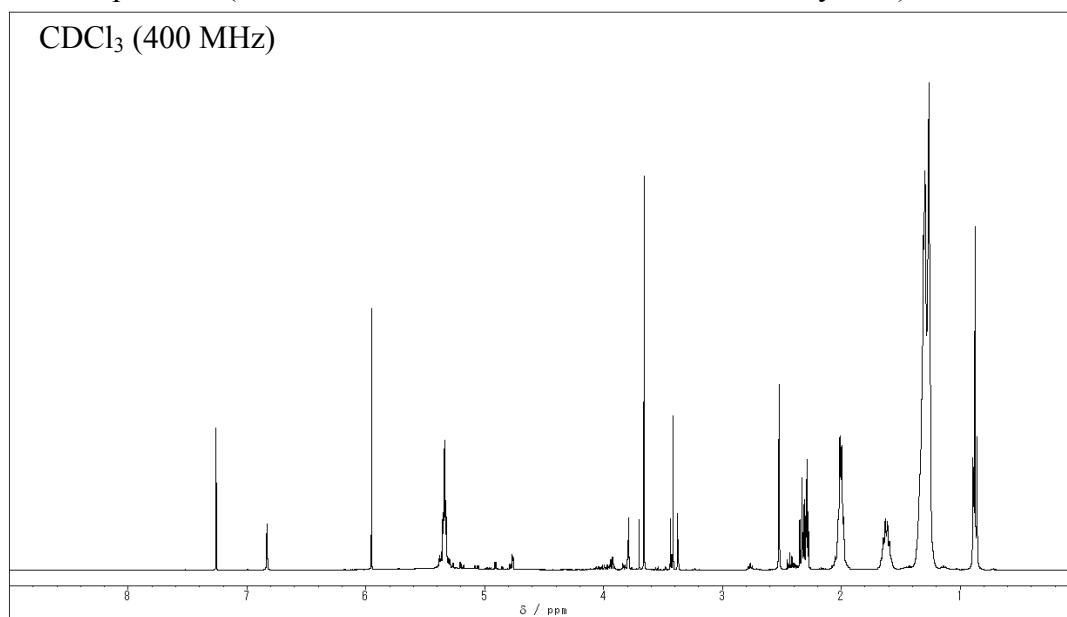

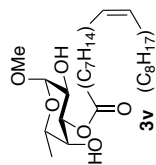

<sup>1</sup>H-NMR spectrum of **3v**

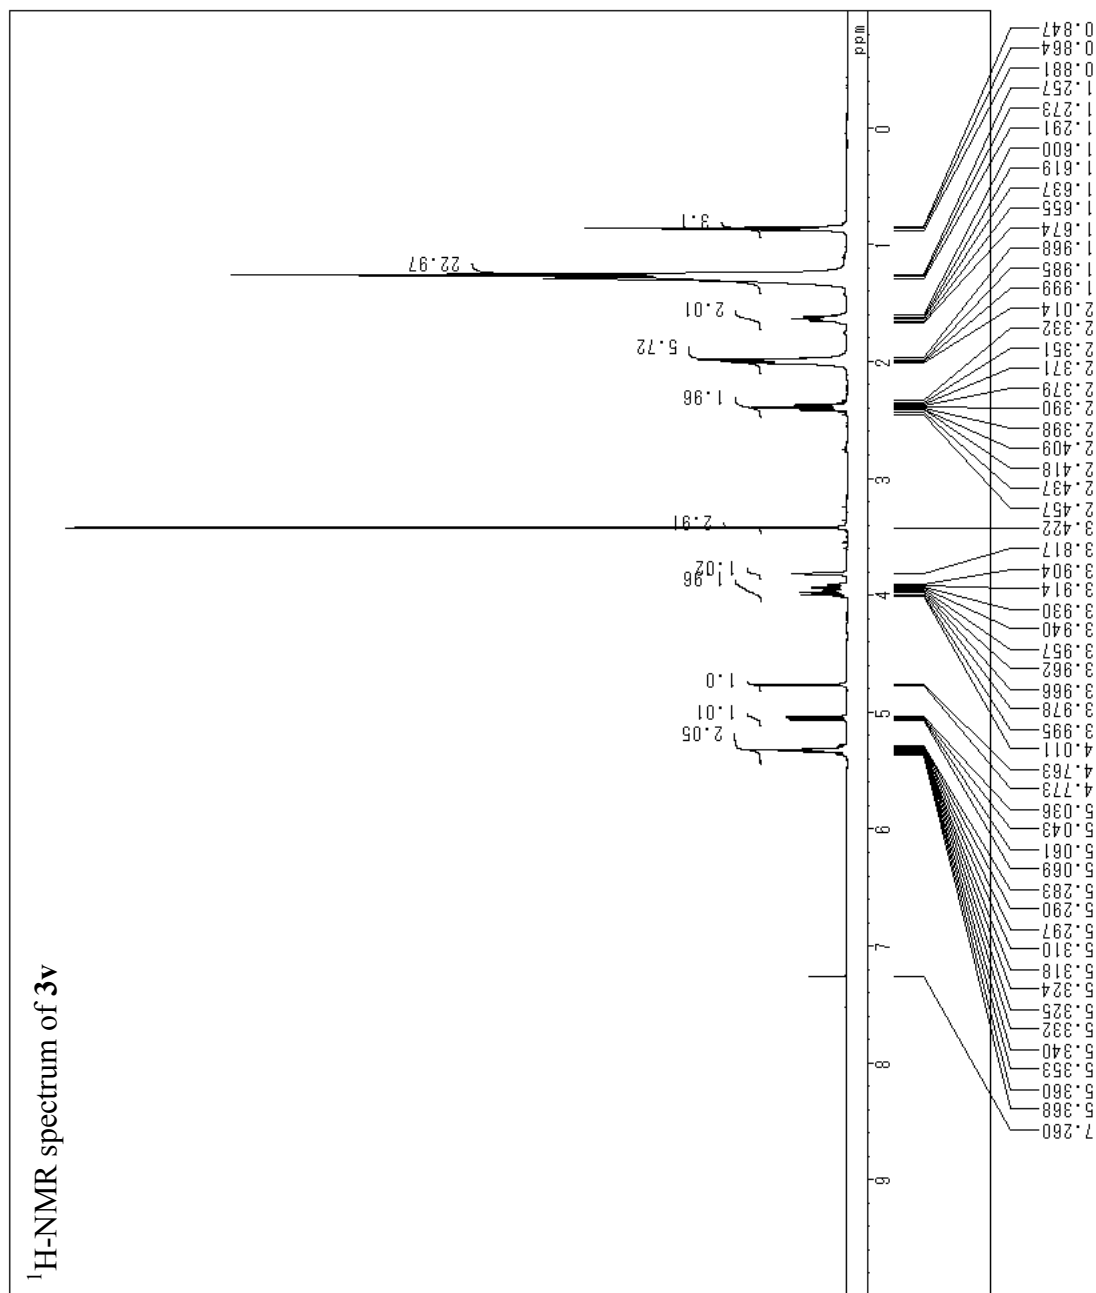

Comment TSV25031\_column2\_13C\_COSY  
 Date y\_20190213\_01  
 Date 2019/Feb/13  
 ObsNuc <sup>1</sup>H  
 ExMode PROTON\_001  
 ObsFreq 400.27 MHz  
 Scan 16  
 AcqTime 2.5559 s  
 Acc. Interval 5.5559 s  
 Spinning 18.0 Hz  
 Temperature 25.0 °C  
 Solvent cdcl<sub>3</sub>

$^1\text{H}$ - $^1\text{H}$  COSY spectrum of **3v**

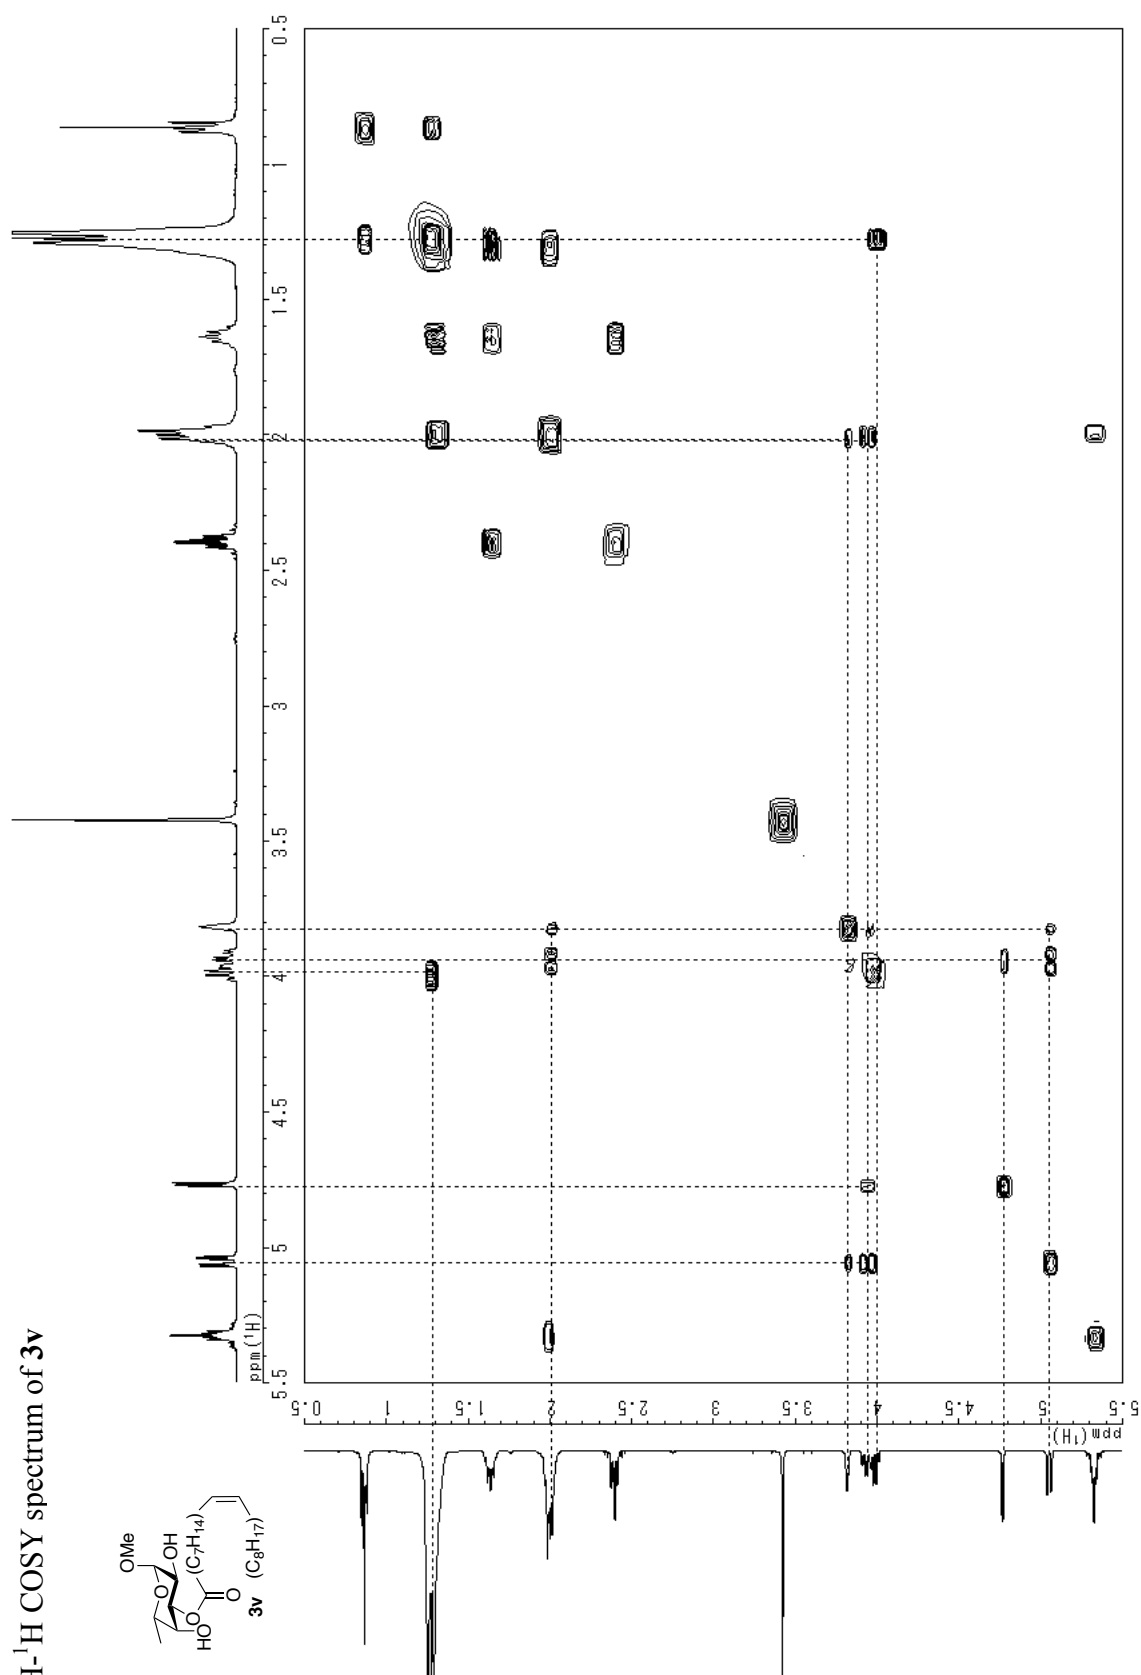

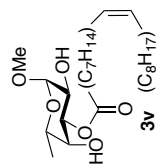

<sup>13</sup>C-NMR spectrum of **3v**

Comment TSV25031\_column2\_13C\_COSY  
 Date 20190213\_01  
 ObsNuc <sup>13</sup>C  
 ExMode CARBON\_001  
 ObsFreq 100.66 MHz  
 Scan 512  
 AcqTime 1.3831 s  
 Acc. Interval 3.3831 s  
 Spinning 20.0 Hz  
 Temperature 25.0 °C  
 Solvent cdcl3

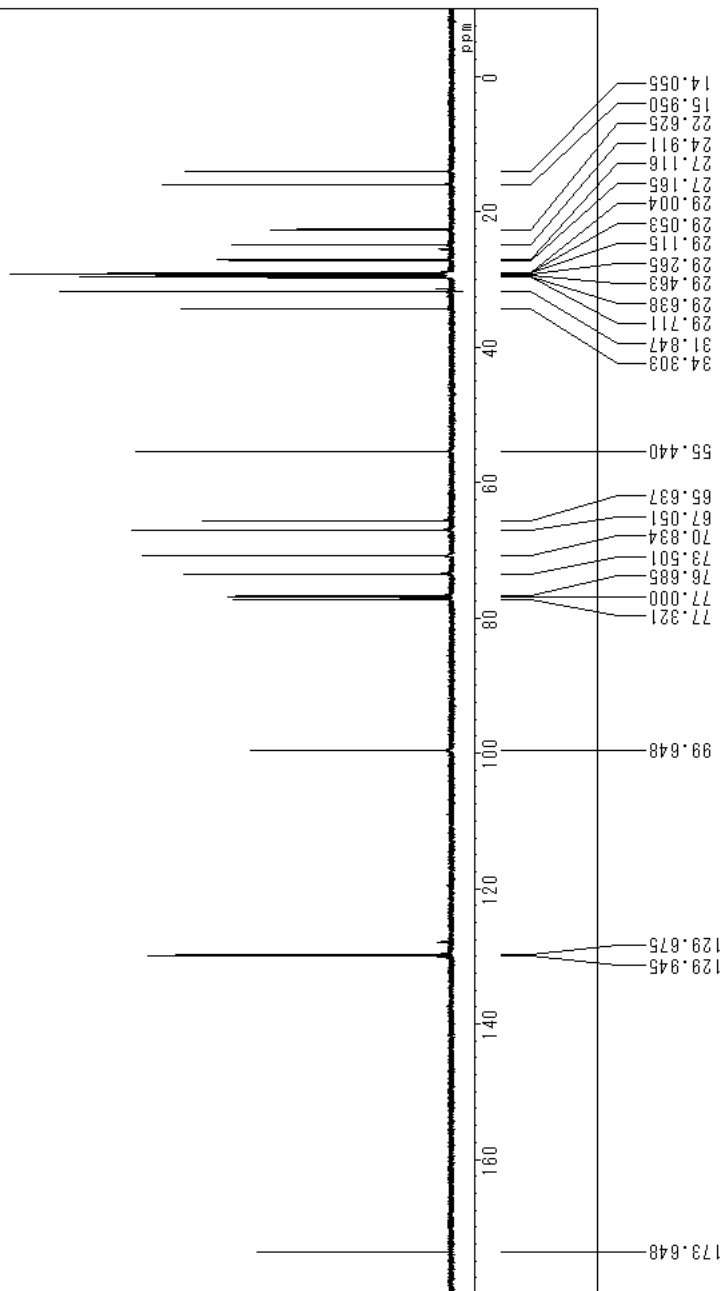

Methyl 3-*O*-3-phenylpropionyl- $\alpha$ -L-fucopyranoside (**3w**)

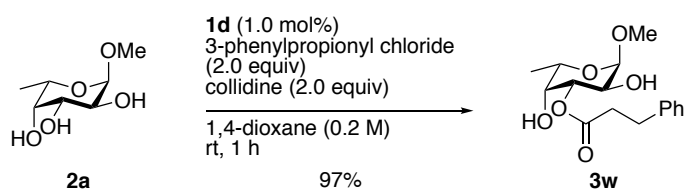

$^1\text{H}$ -NMR spectrum (crude reaction mixture in the presence of catalyst **1d**)

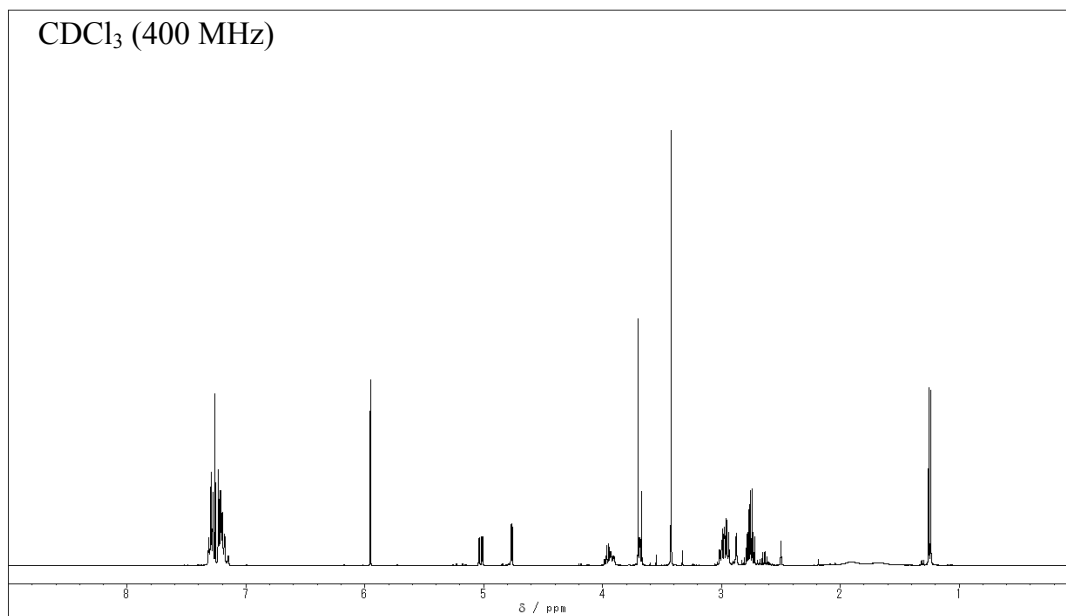

$^1\text{H}$ -NMR spectrum (crude reaction mixture in the absence of catalyst **1d**)

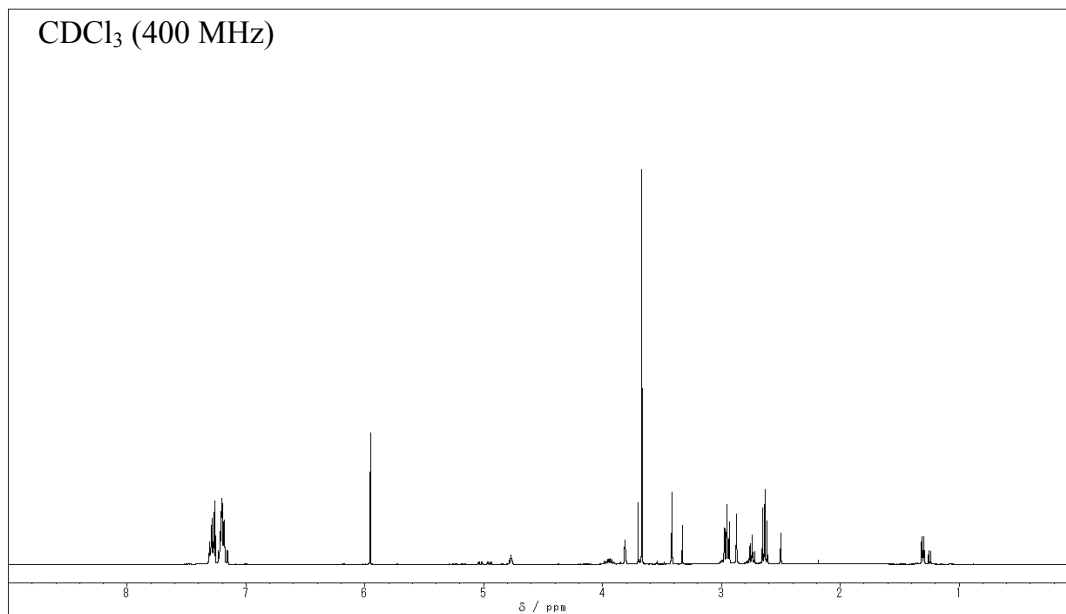

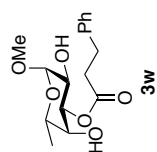

<sup>1</sup>H-NMR spectrum of **3w**

Comment TSV17039\_pure\_13C\_COSY\_2  
 Date\_20170824\_01  
 Date\_2017/Sep/24  
 ObsNuc <sup>1</sup>H  
 ExMode PROTON\_001  
 ObsFreq 399.45 MHz  
 Scan 16  
 AcqTime 2.589 s  
 Acc. Interval 5.589 s  
 Spinning 16.0 Hz  
 Temperature 25.0 °C  
 Solvent cdcl<sub>3</sub>

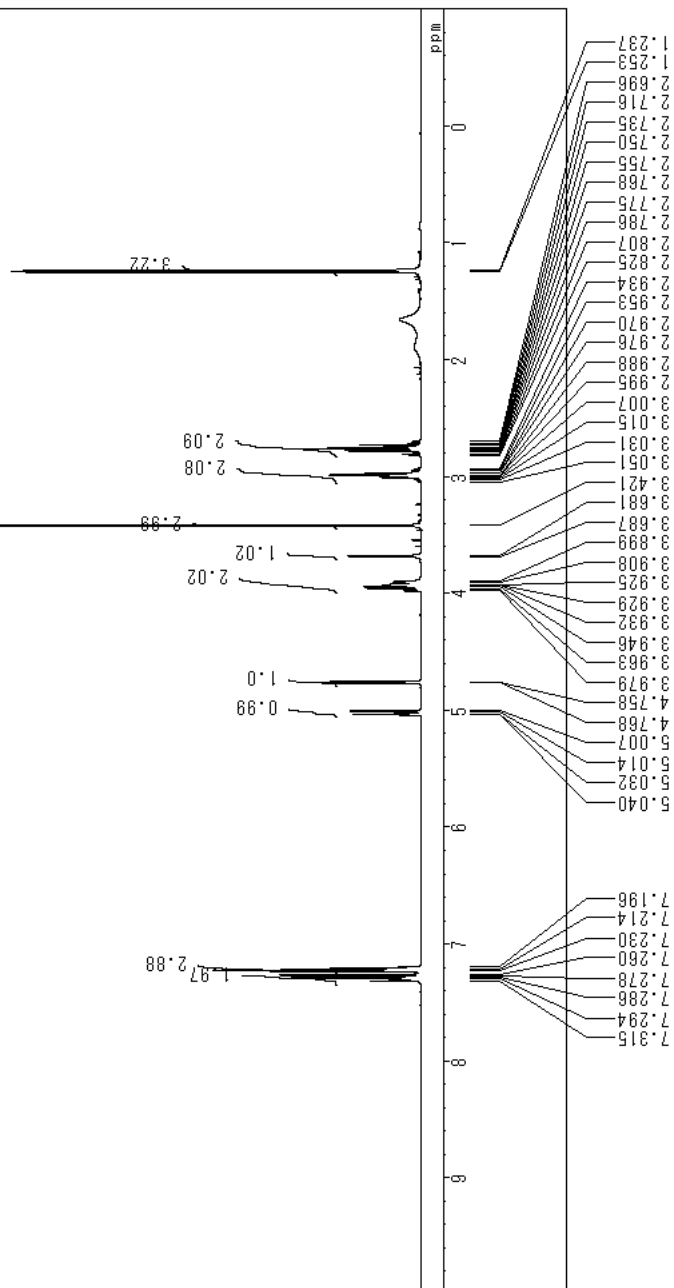

$^1\text{H}$ - $^1\text{H}$  COSY spectrum of **3w**

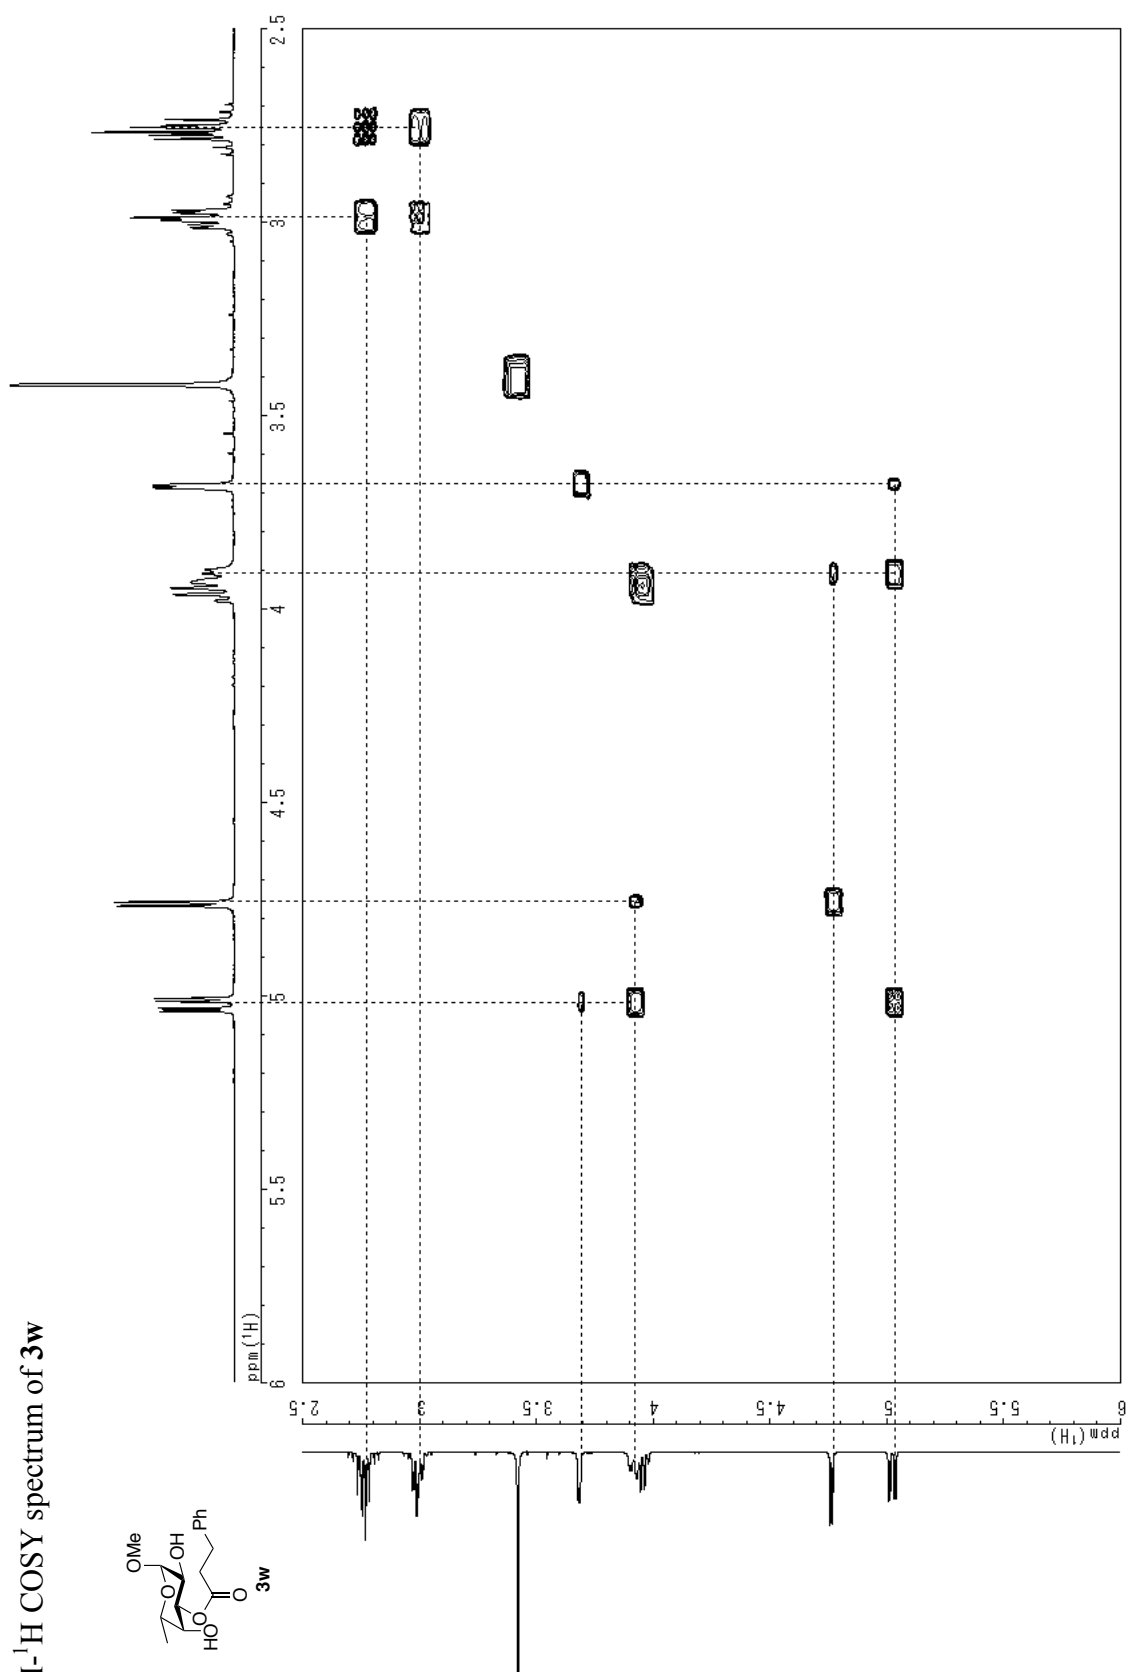

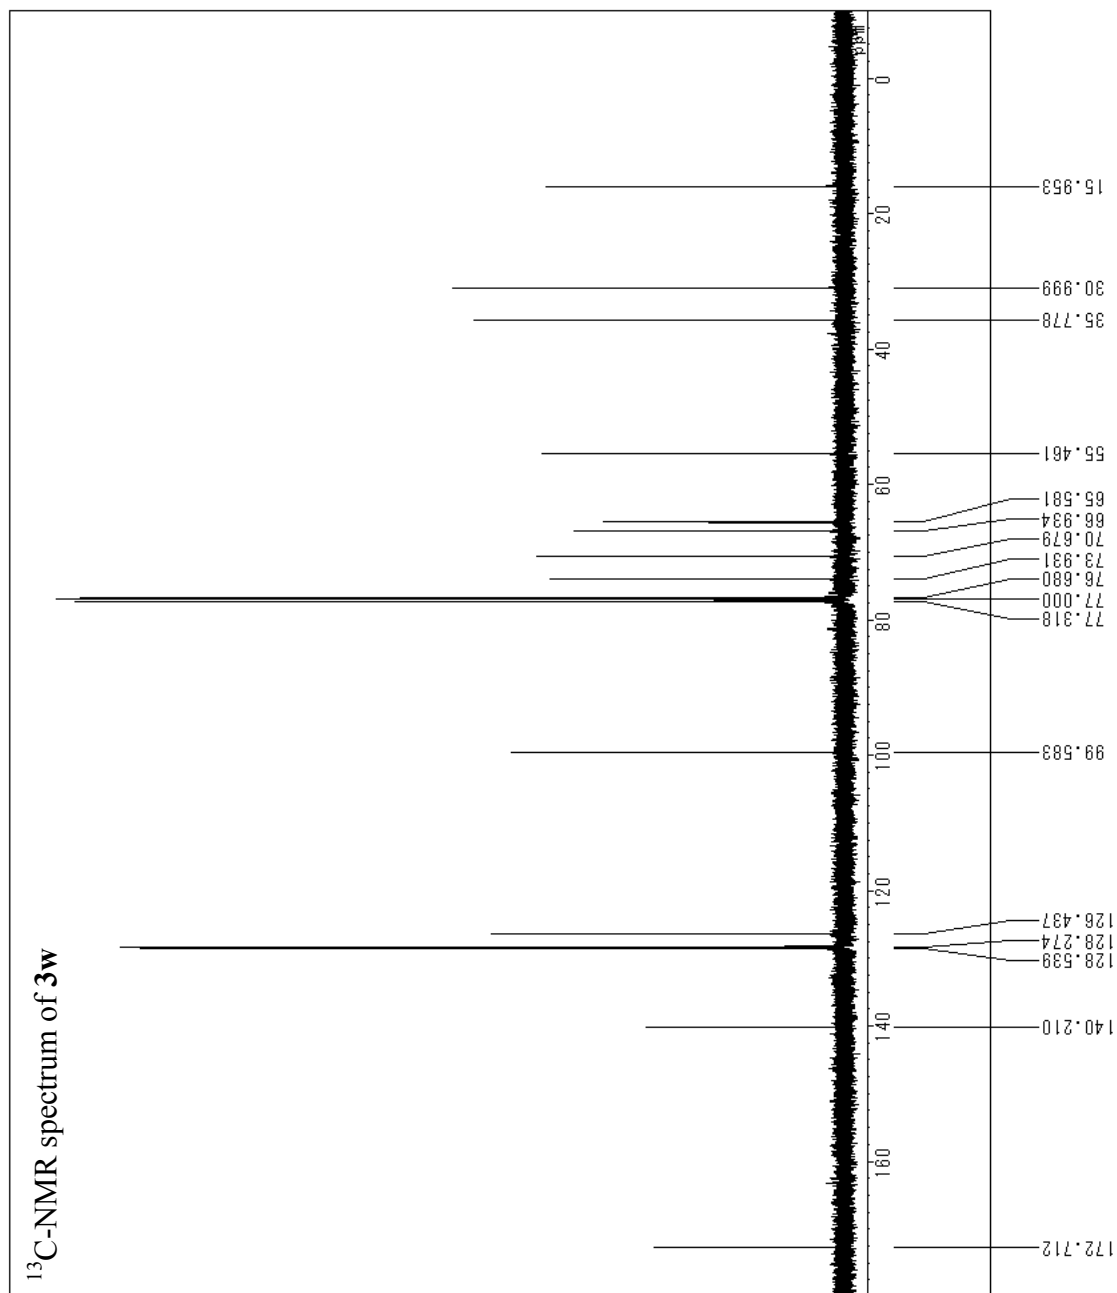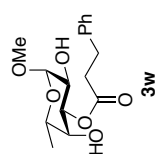

Comment TSV17039\_pure\_13C\_COSY\_2  
 Date\_20170824\_01  
 Date\_2017/Sep/24  
 ObsNuc <sup>13</sup>C  
 ExMode CARBON\_001  
 ObsFreq 100.45 MHz  
 Scan 512  
 AcqTime 1.3831 s  
 Acc. Interval 3.3831 s  
 Spinning 20.0 Hz  
 Temperature 25.0 °C  
 Solvent cdcl<sub>3</sub>



Methyl 3-*O*-isovaleryl- $\alpha$ -L-fucopyranoside (**3x**)

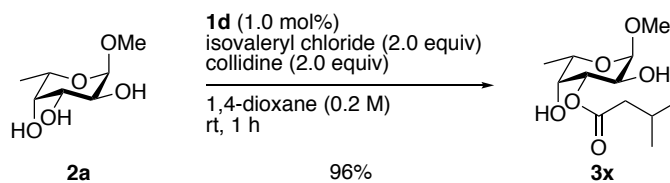

$^1\text{H}$ -NMR spectrum (crude reaction mixture in the presence of catalyst **1d**)

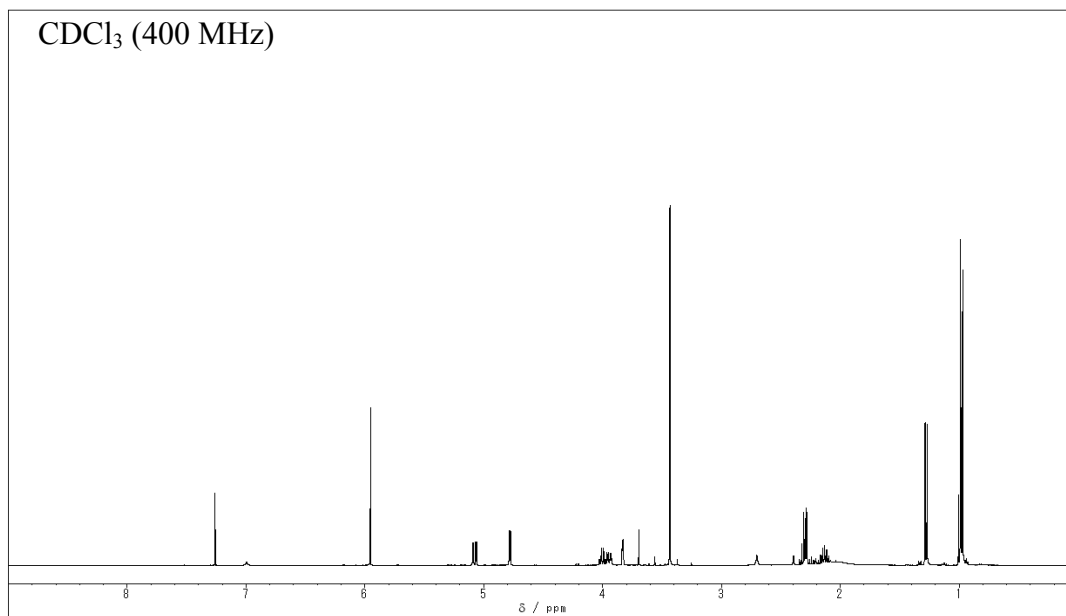

$^1\text{H}$ -NMR spectrum (crude reaction mixture in the absence of catalyst **1d**)

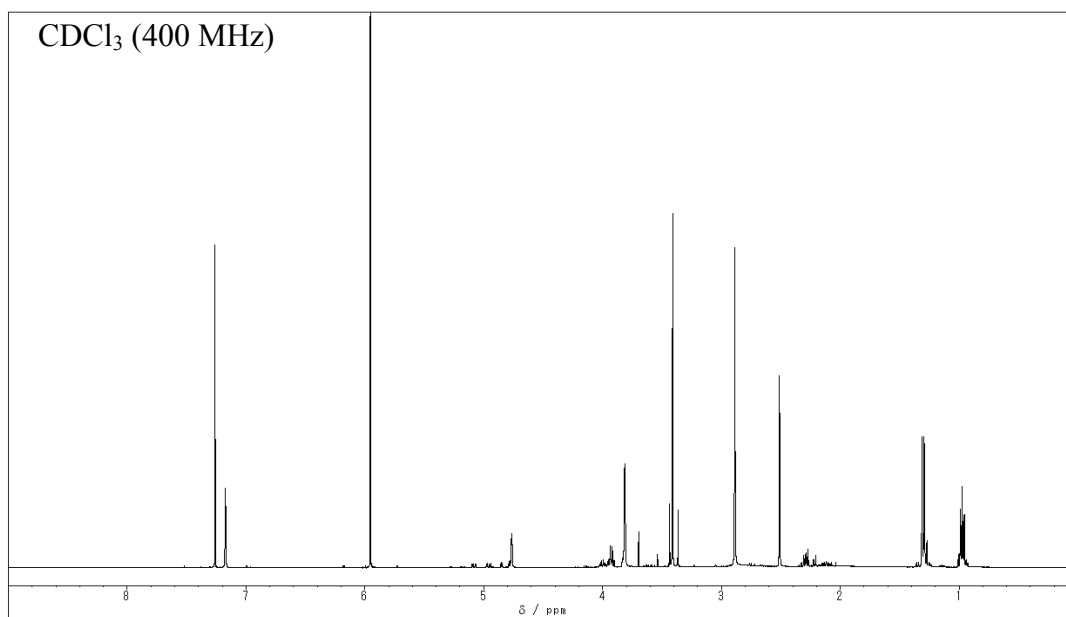

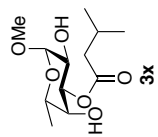

<sup>1</sup>H-NMR spectrum of 3x

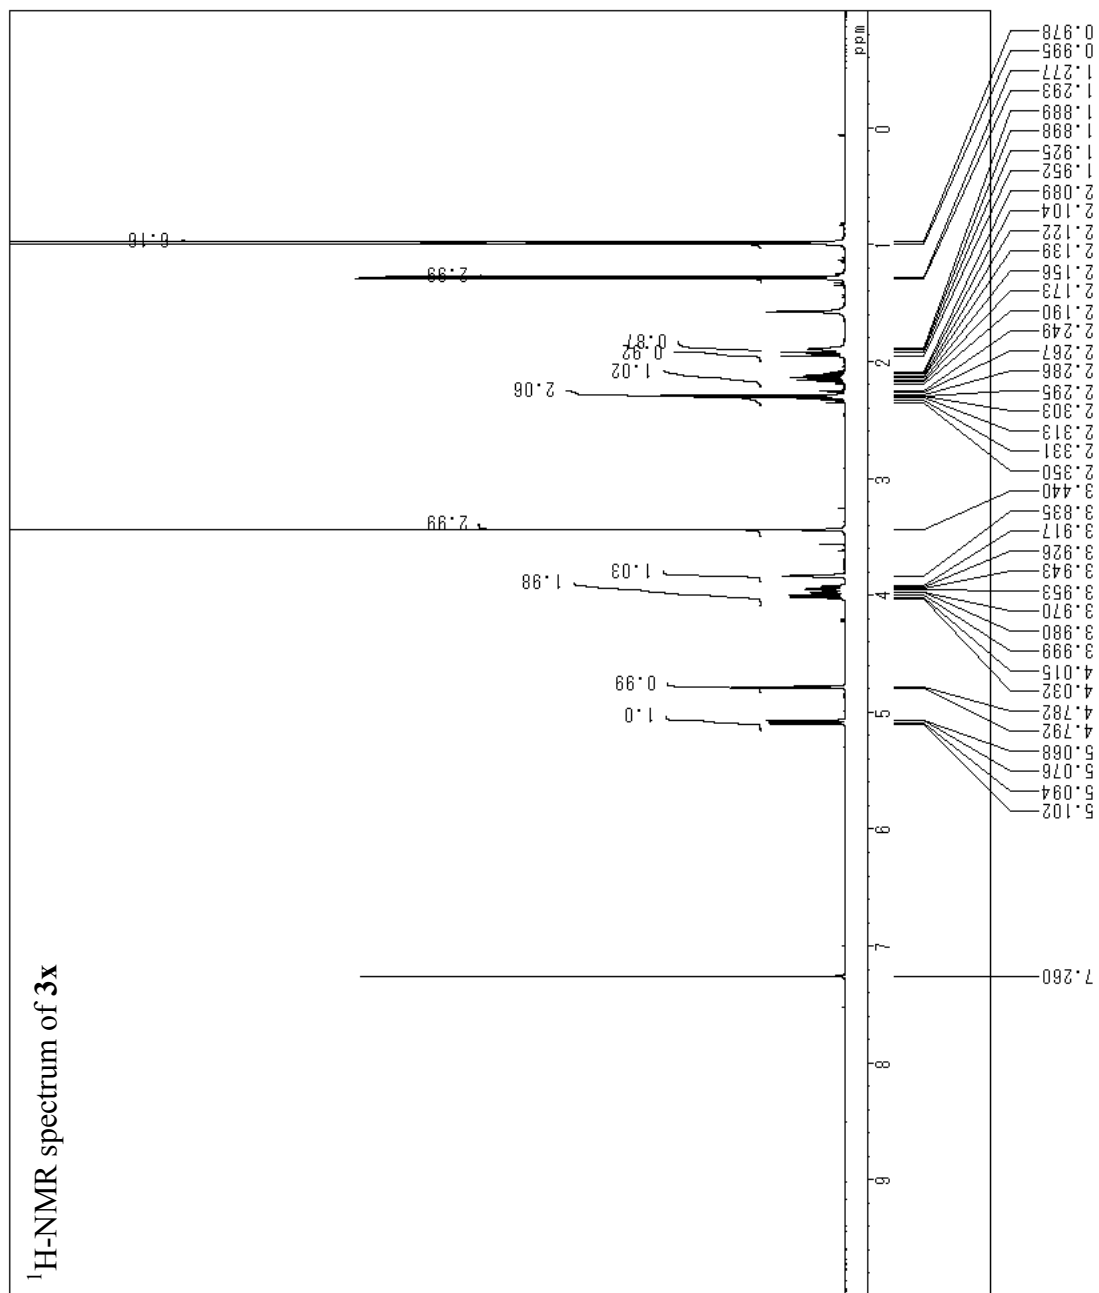

Comment TSV19008\_pure\_13C\_COSY\_2  
 0171018\_01  
 Date 2017/Oct/18  
 ObsNuc <sup>1</sup>H  
 ExMode PROTON\_001  
 ObsFreq 399.45 MHz  
 Scan 8  
 AcqTime 2.589 s  
 Acc. Interval 5.589 s  
 Spinning 18.0 Hz  
 Temperature 25.0 °C  
 Solvent cdcl<sub>3</sub>

$^1\text{H}$ - $^1\text{H}$  COSY spectrum of **3x**

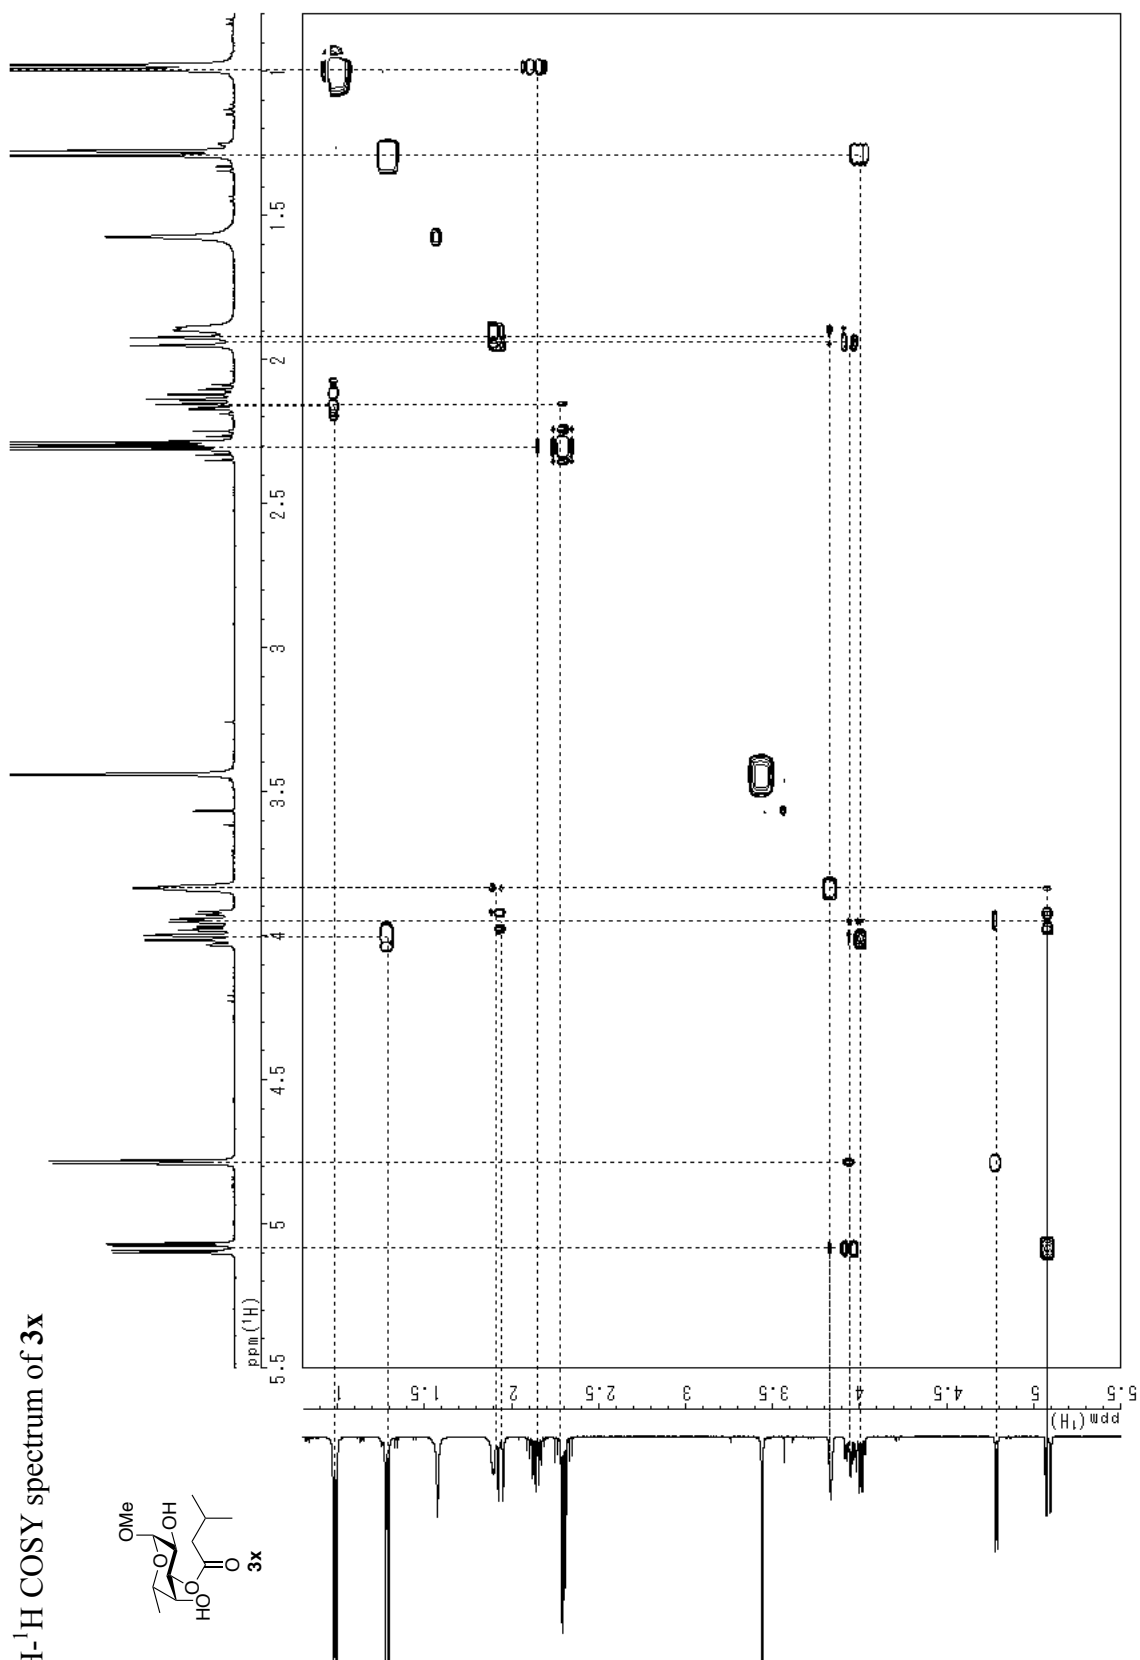

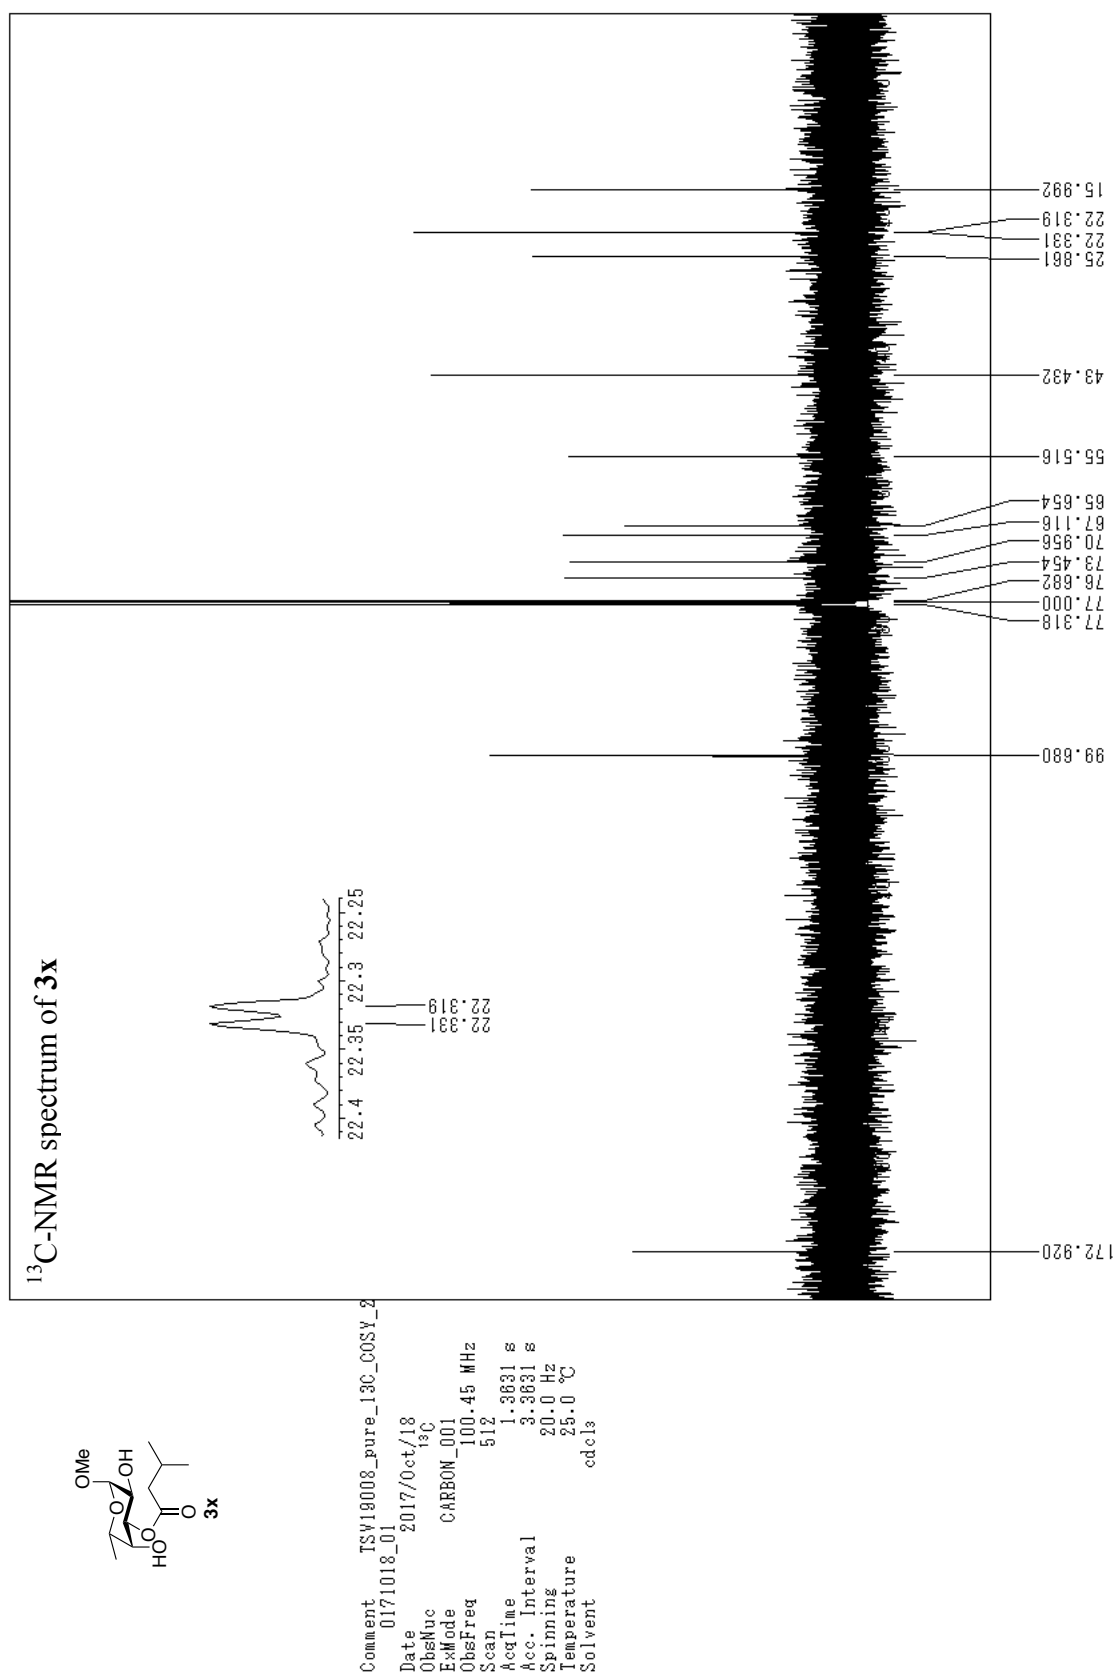

Methyl 3-*O*-isobutyryl- $\alpha$ -L-fucopyranoside (**3y**)

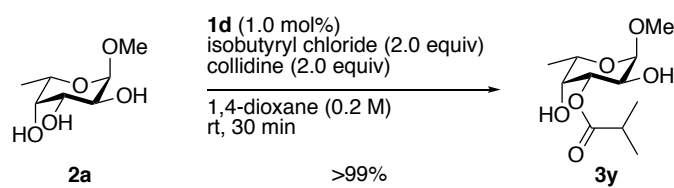

$^1\text{H}$ -NMR spectrum (crude reaction mixture in the presence of catalyst **1d**)

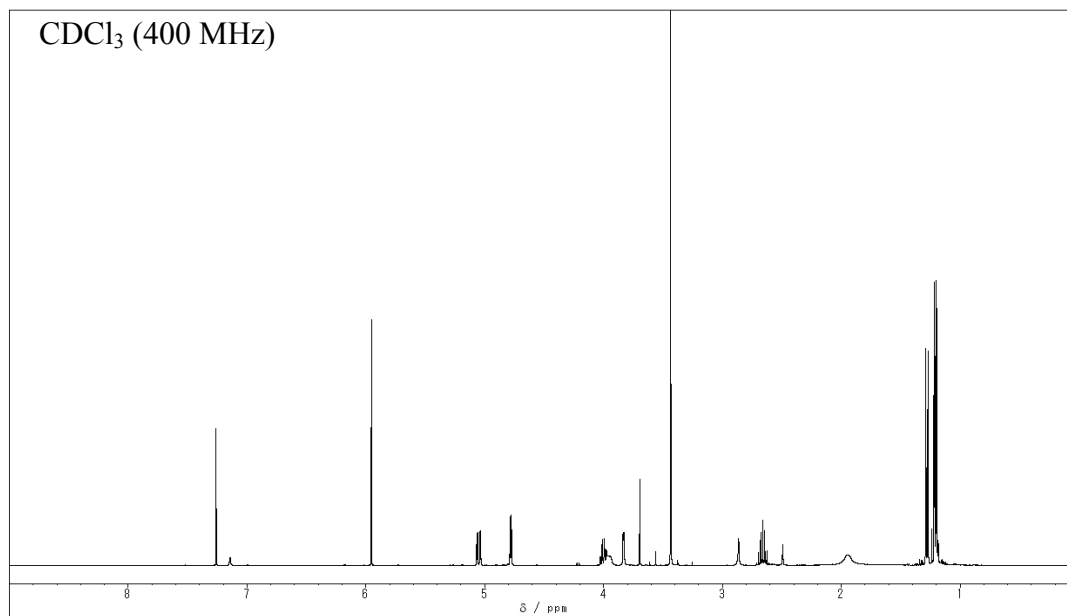

$^1\text{H}$ -NMR spectrum (crude reaction mixture in the absence of catalyst **1d**)

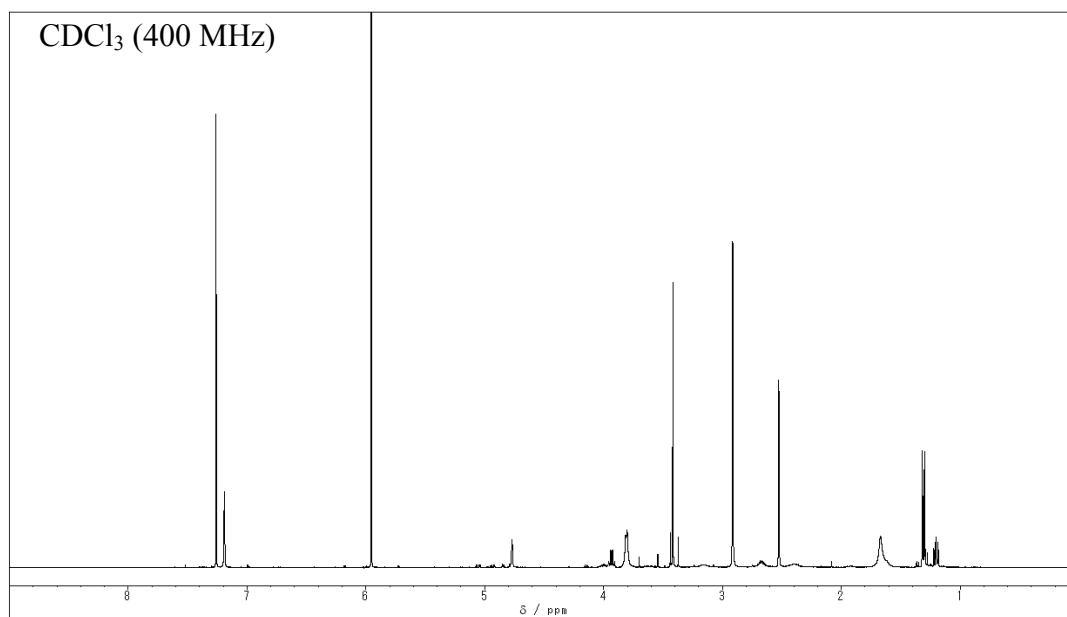

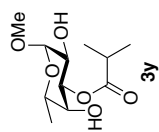

<sup>1</sup>H-NMR spectrum of **3y**

Comment TSV19010\_pure\_13C\_COSY\_2  
 0171017\_01  
 Date 2017/Oct/17  
 ObsNuc <sup>1</sup>H  
 ExMode PROTON\_001  
 ObsFreq 400.27 MHz  
 Scan 16  
 AcqTime 2.5559 s  
 Acc. Interval 5.5559 s  
 Spinning 18.0 Hz  
 Temperature 25.0 °C

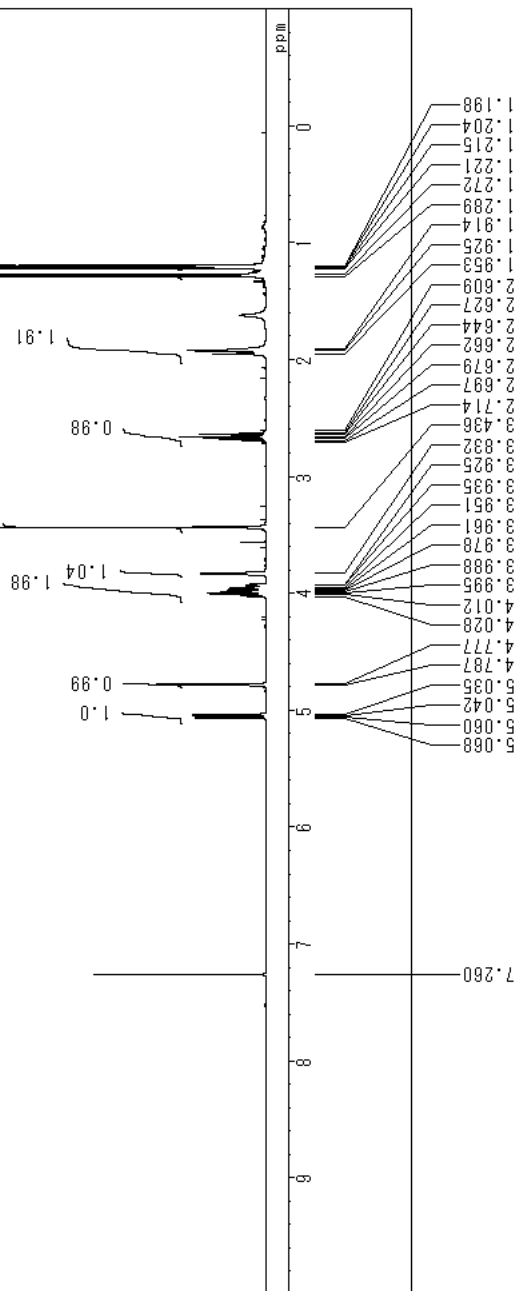

$^1\text{H}$ - $^1\text{H}$  COSY spectrum of **3y**

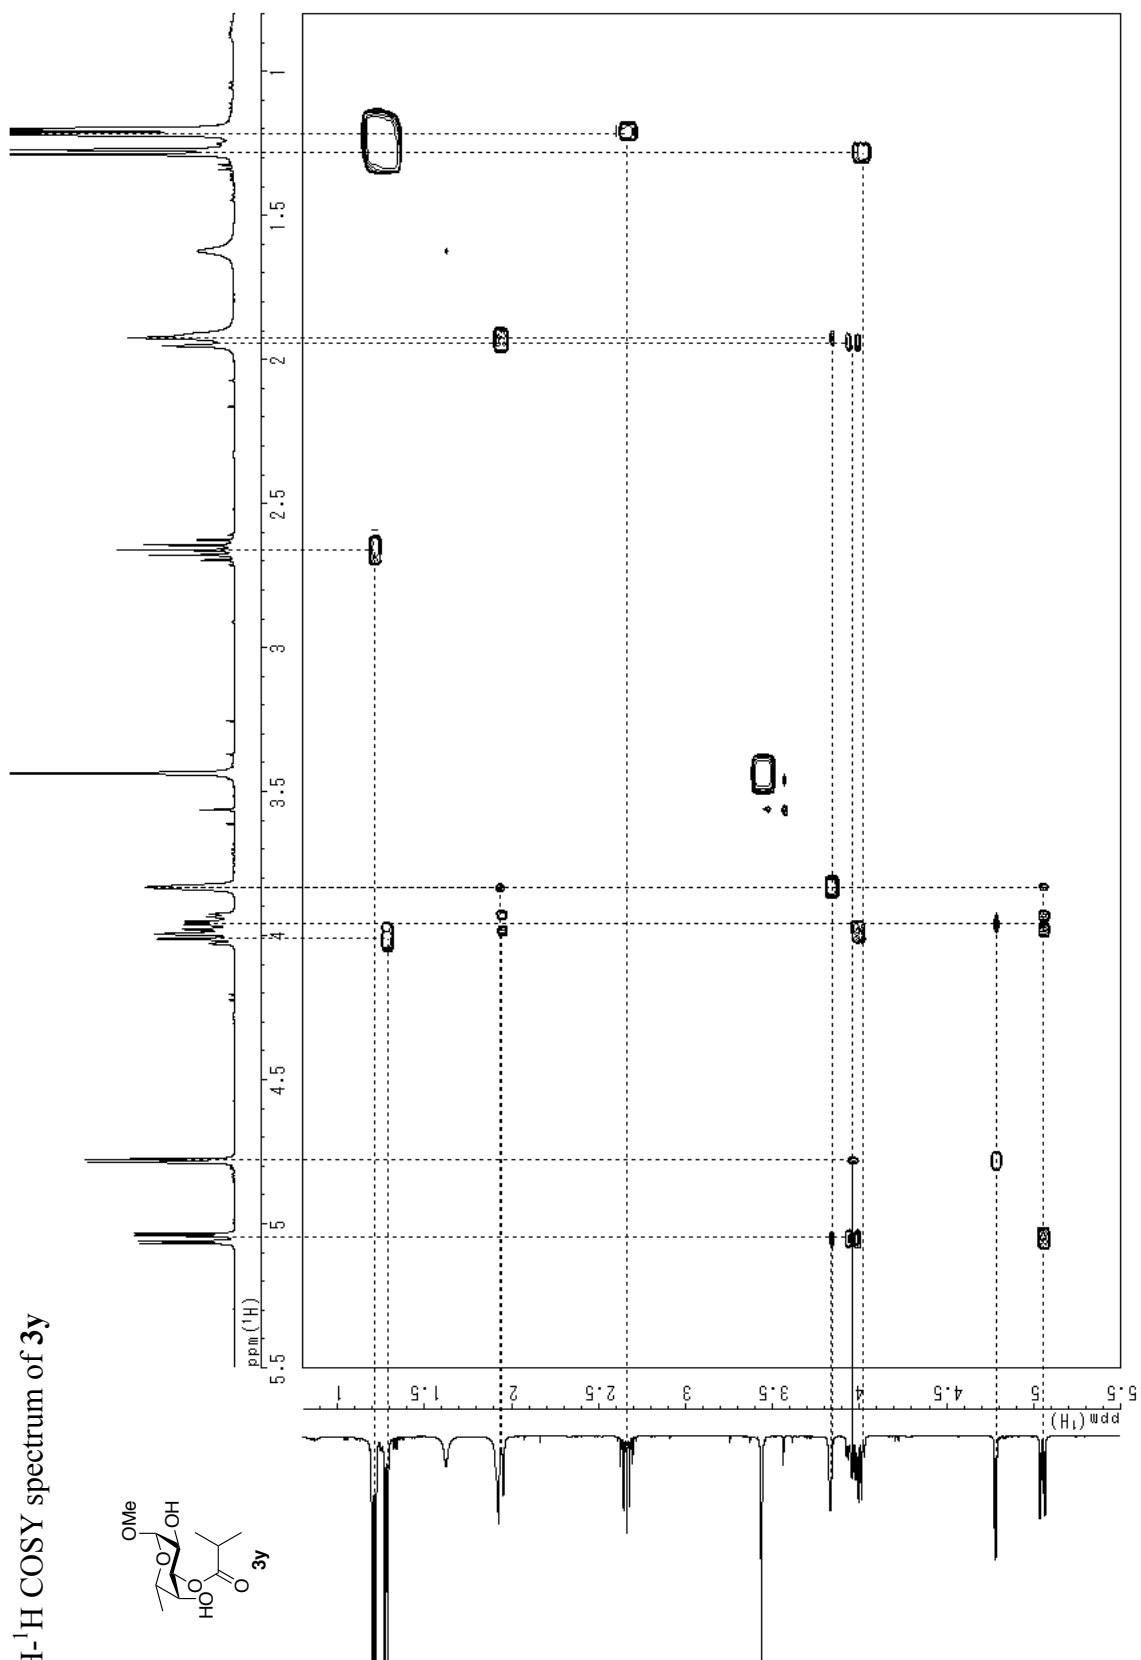

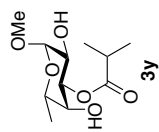

<sup>13</sup>C-NMR spectrum of **3y**

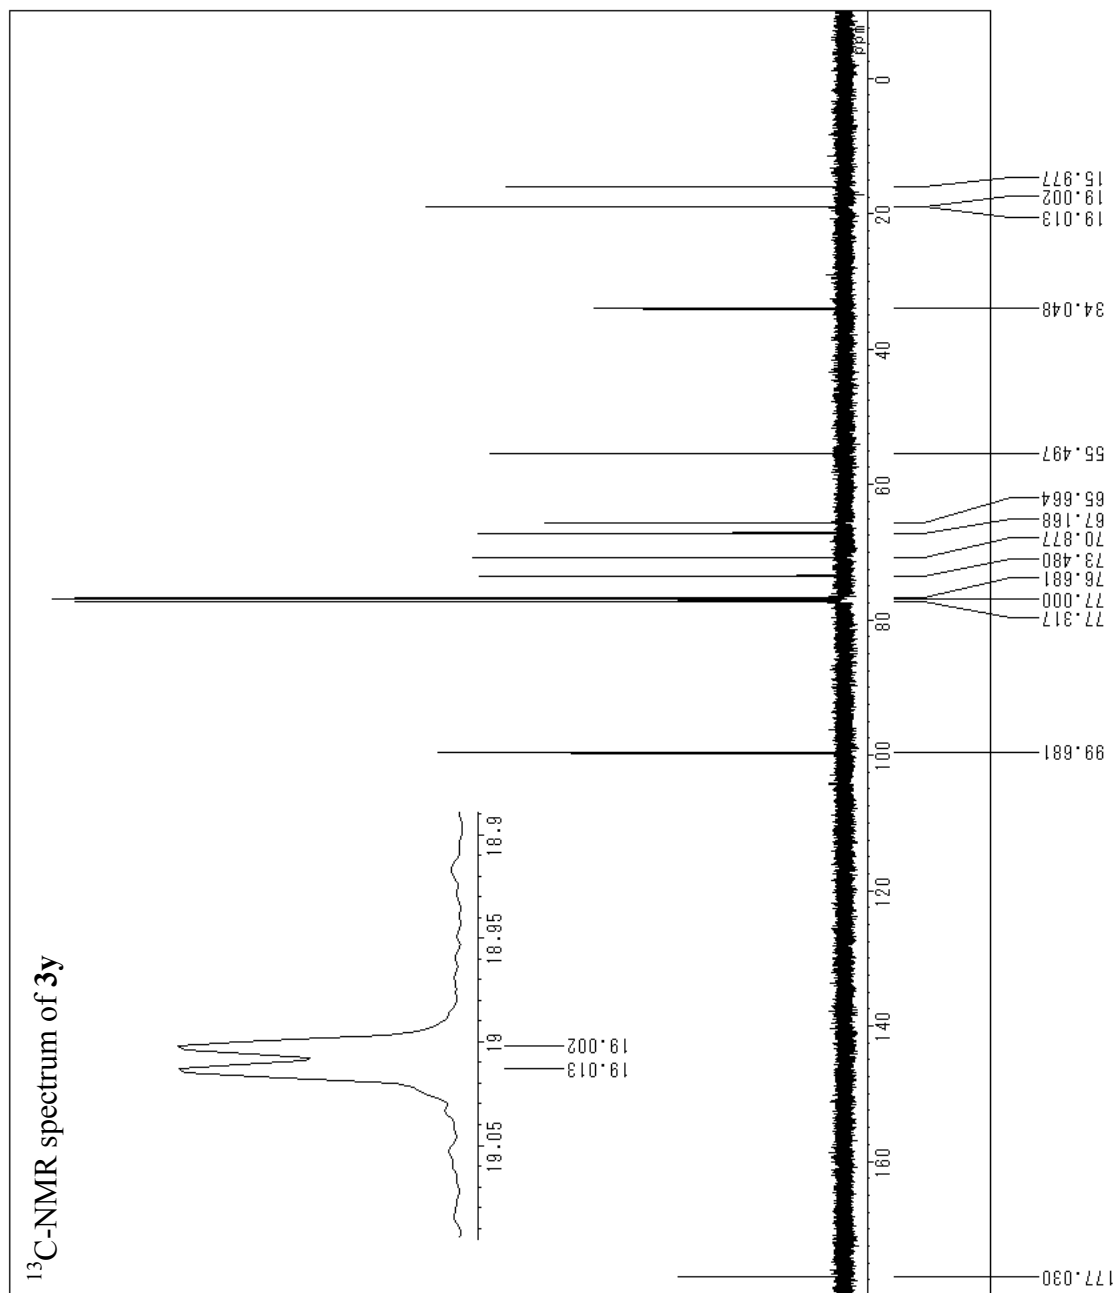

Comment TSV19010\_pure\_13C\_COSY\_2  
 0171017\_01  
 Date 2017/Oct/17  
 ObsNuc <sup>13</sup>C  
 ExMode CARBON\_001  
 ObsFreq 100.66 MHz  
 Scan 512  
 AcqTime 1.3831 s  
 Acc. Interval 3.3831 s  
 Spinning 20.0 Hz  
 Temperature 25.0 °C  
 Solvent cdcl<sub>3</sub>



Methyl 3-*O*-pivaloyl- $\alpha$ -L-fucopyranoside (**3z**)

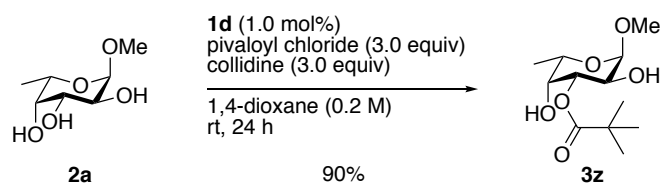

$^1\text{H}$ -NMR spectrum (crude reaction mixture in the presence of catalyst **1d**)

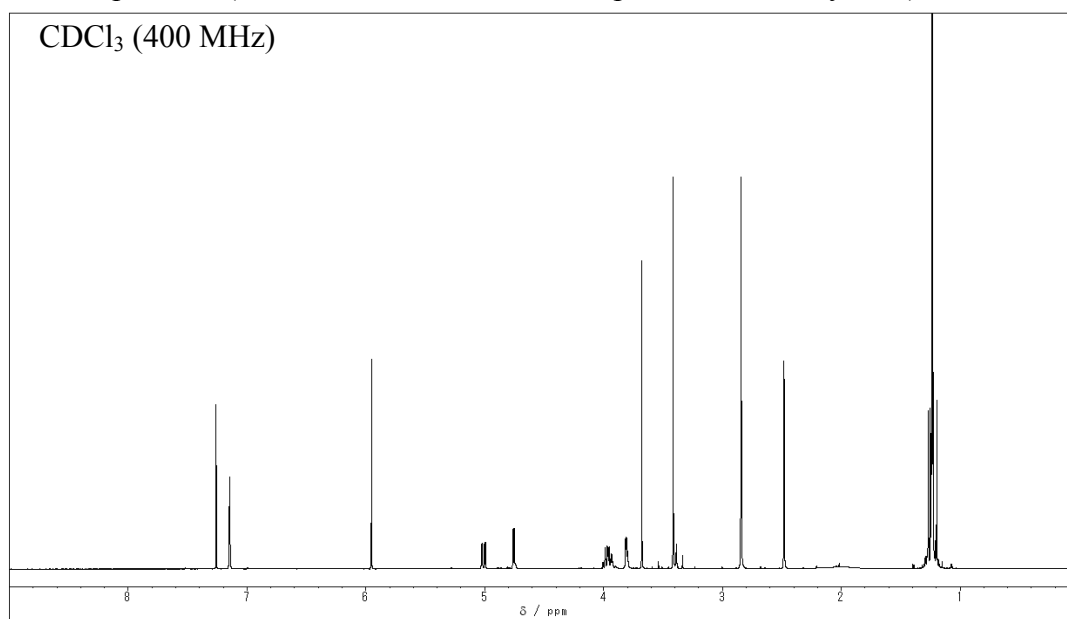

$^1\text{H}$ -NMR spectrum (crude reaction mixture in the absence of catalyst **1d**)

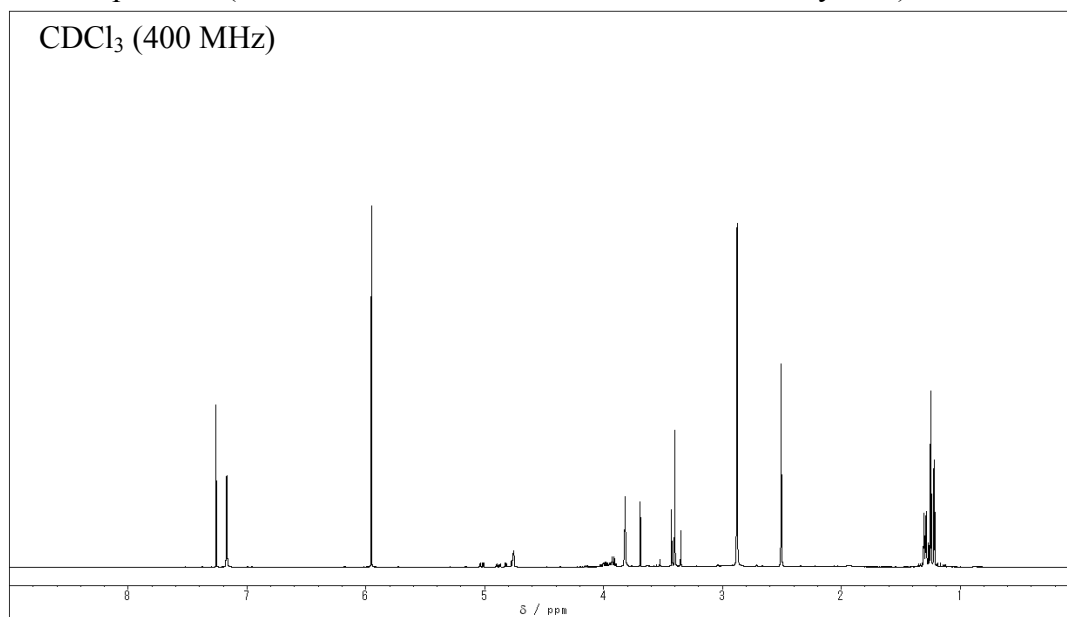

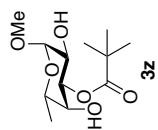

<sup>1</sup>H-NMR spectrum of **3z**

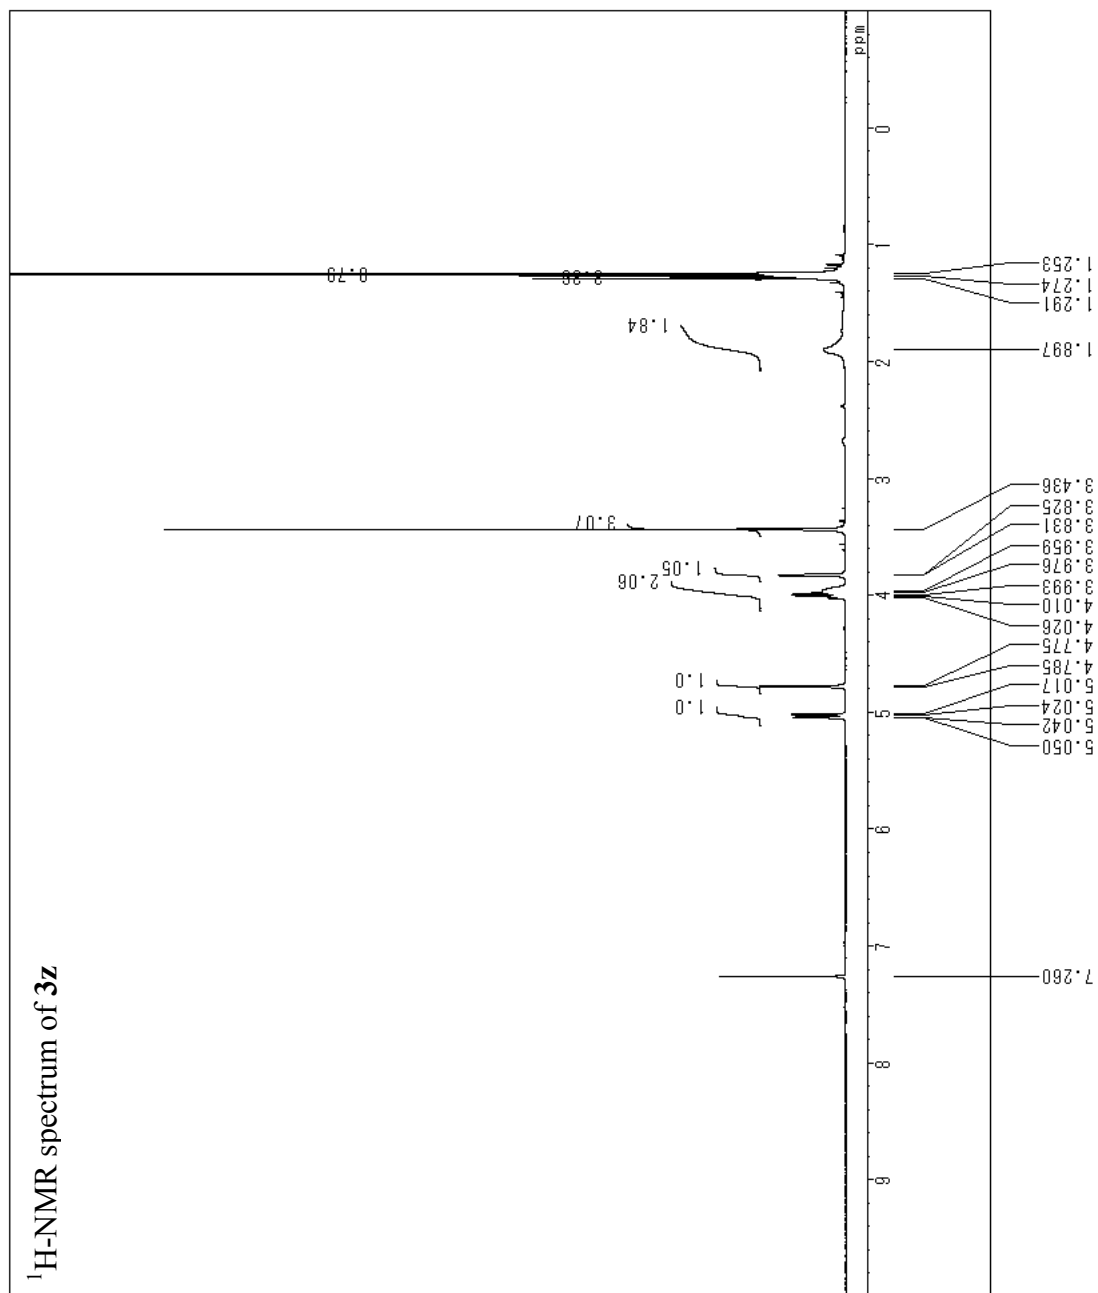

Comment TSV19020\_pure\_13C\_COSY\_2  
 0171025\_01  
 Date 2017/Oct/25  
 ObsNuc <sup>1</sup>H  
 ExMode PROTON\_001  
 ObsFreq 400.27 MHz  
 Scan 16  
 AcqTime 2.5559 s  
 Acc. Interval 5.5559 s  
 Spinning 18.0 Hz  
 Temperature 25.0 °C  
 Solvent cdcl<sub>3</sub>

$^1\text{H}$ - $^1\text{H}$  COSY spectrum of **3z**

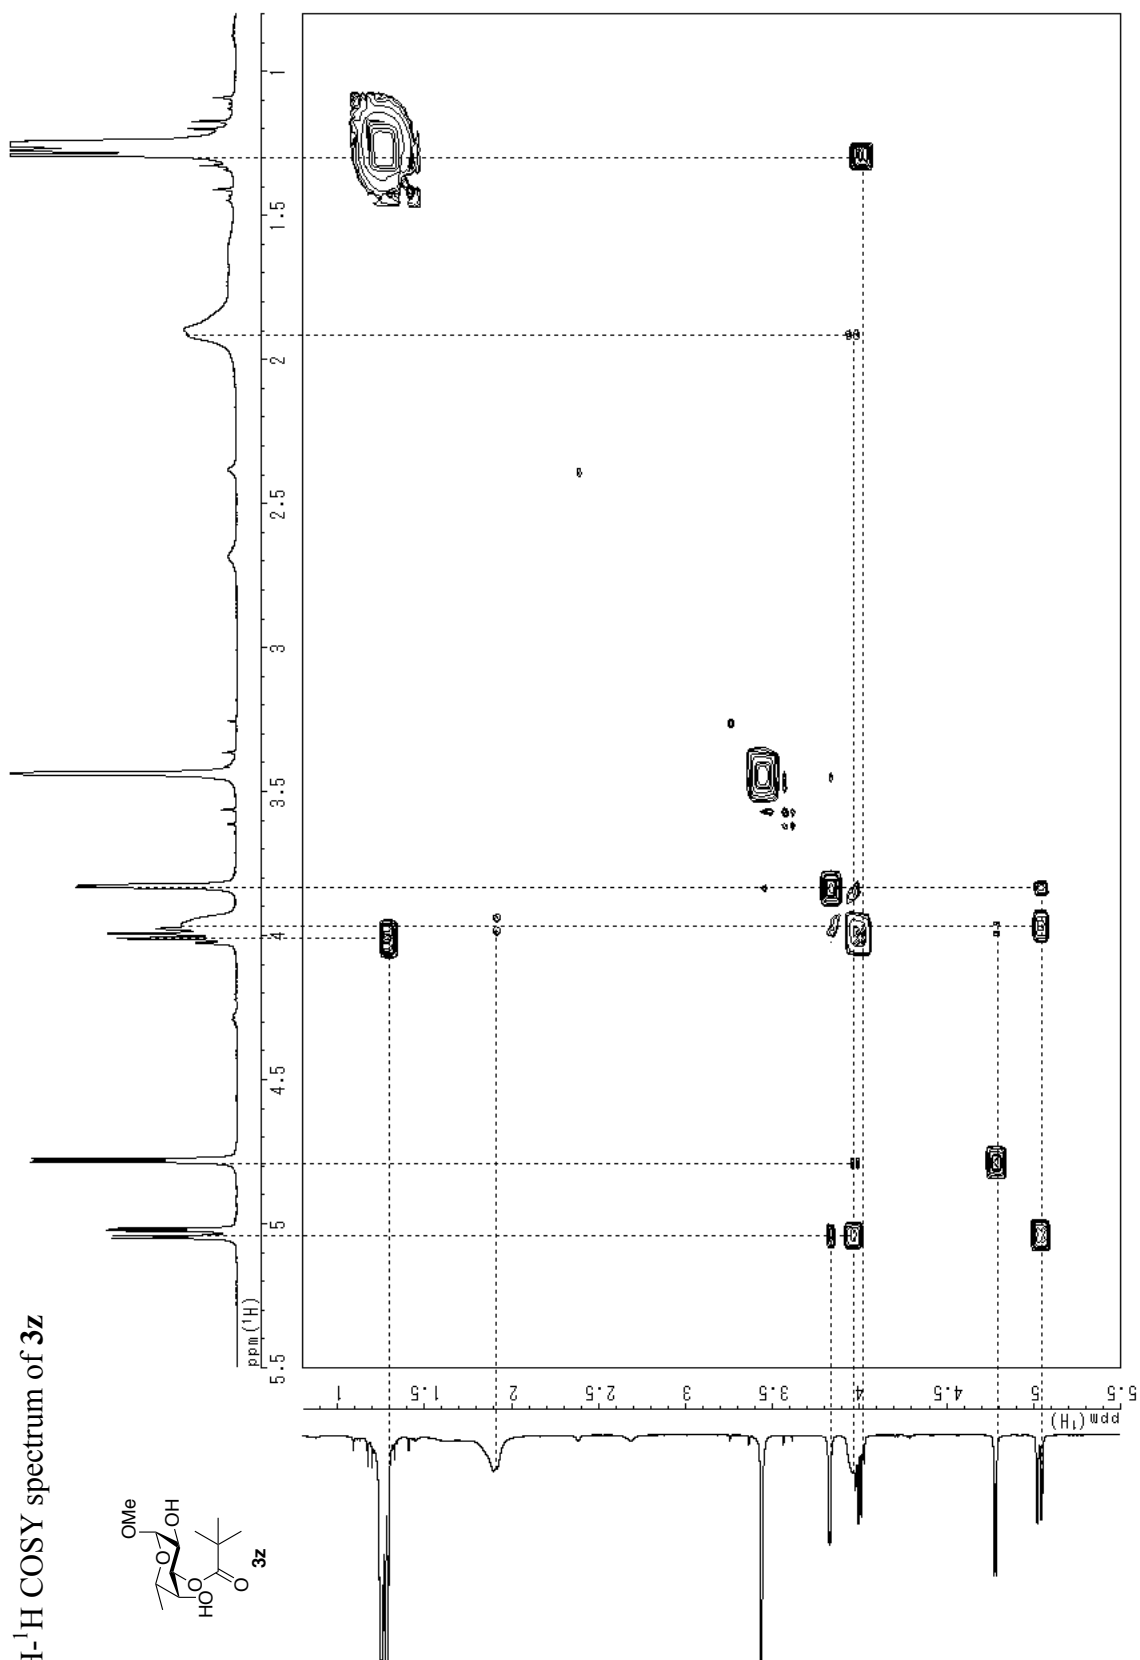

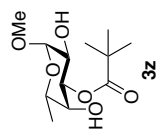

# <sup>13</sup>C-NMR spectrum of 3z

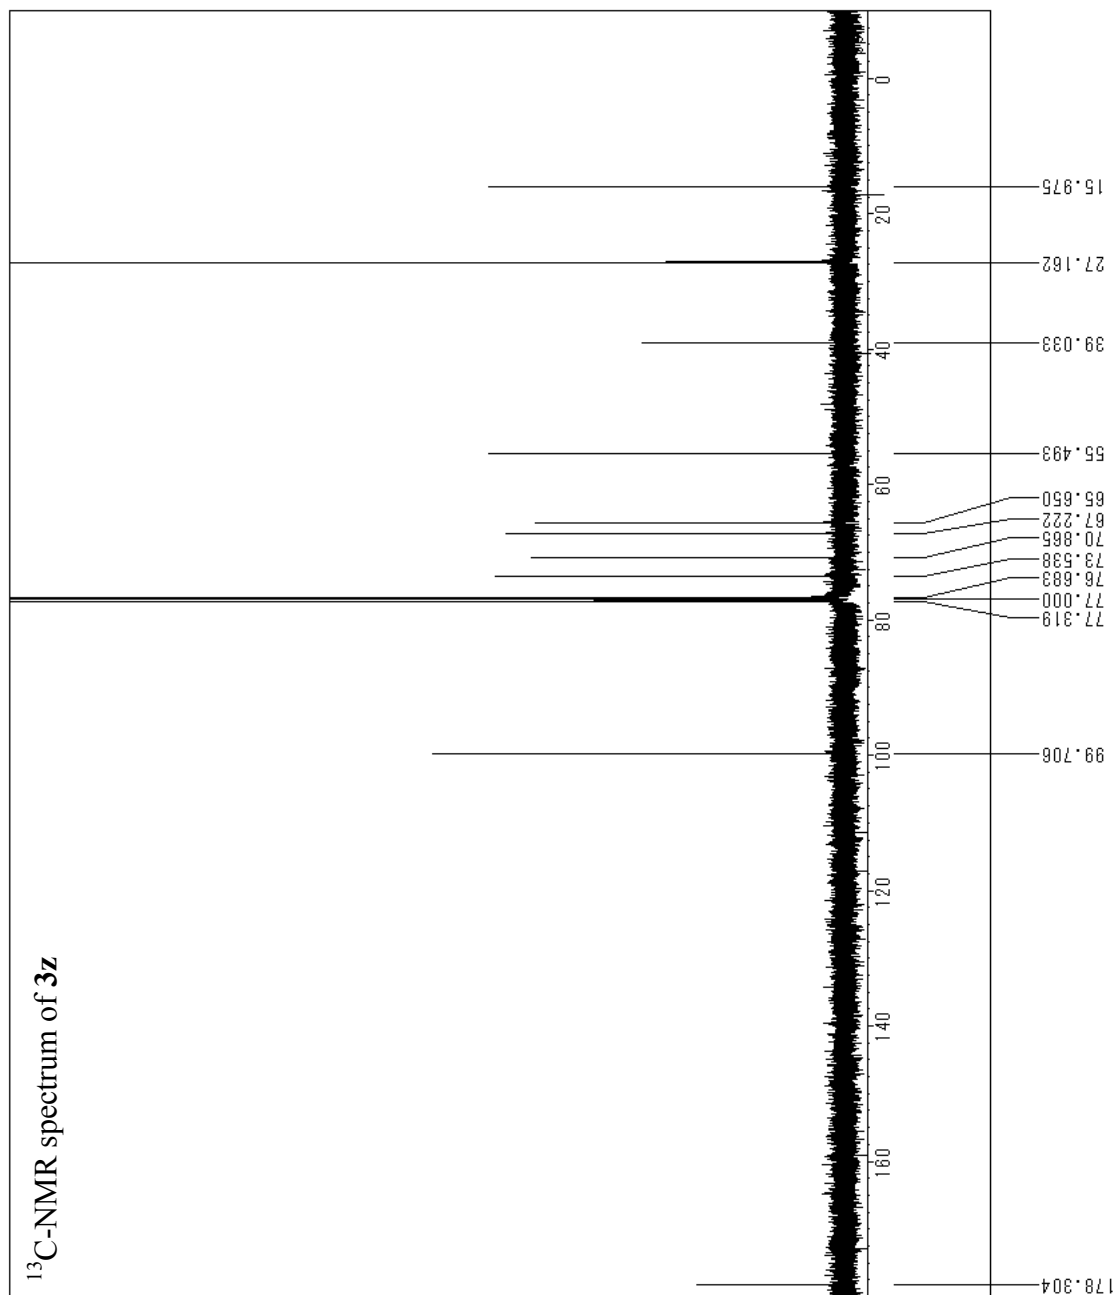

Comment TSV19020\_pure\_13C\_COSY\_2  
 0171025\_01  
 Date 2017/Oct/25  
 ObsNuc <sup>13</sup>C  
 ExMode CARBON\_001  
 ObsFreq 100.66 MHz  
 Scan 512  
 AcqTime 1.3831 s  
 Acc. Interval 3.3831 s  
 Spinning 20.0 Hz  
 Temperature 25.0 °C  
 Solvent cdcl<sub>3</sub>

Methyl 3-*O*-cinnamoyl- $\alpha$ -L-fucopyranoside (**3aa**)

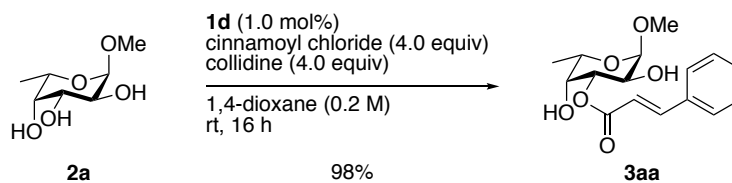

$^1\text{H}$ -NMR spectrum (crude reaction mixture in the presence of catalyst **1d**)

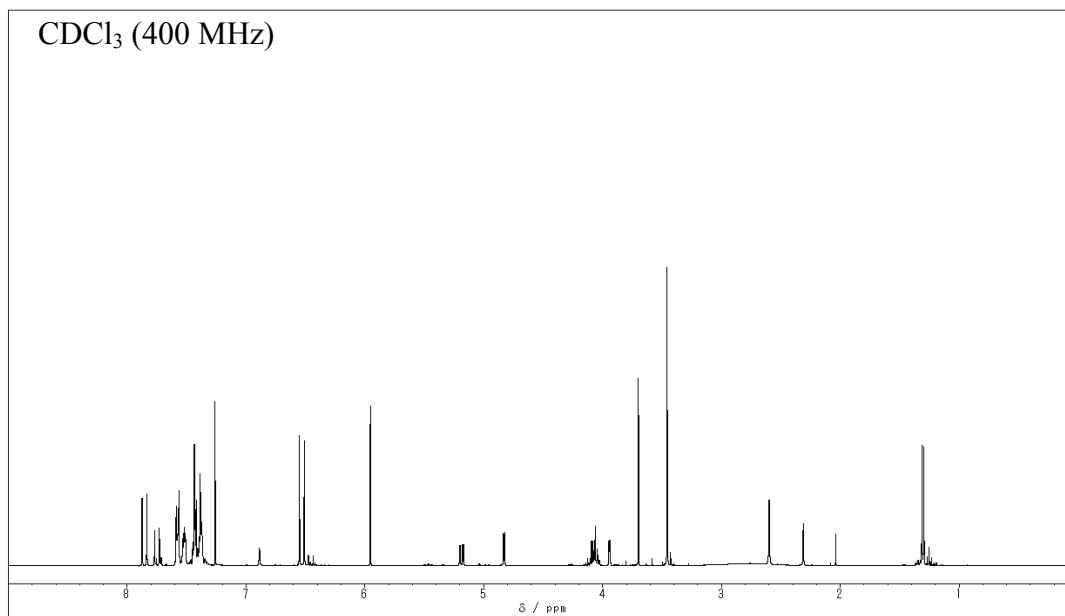

$^1\text{H}$ -NMR spectrum (crude reaction mixture in the absence of catalyst **1d**)

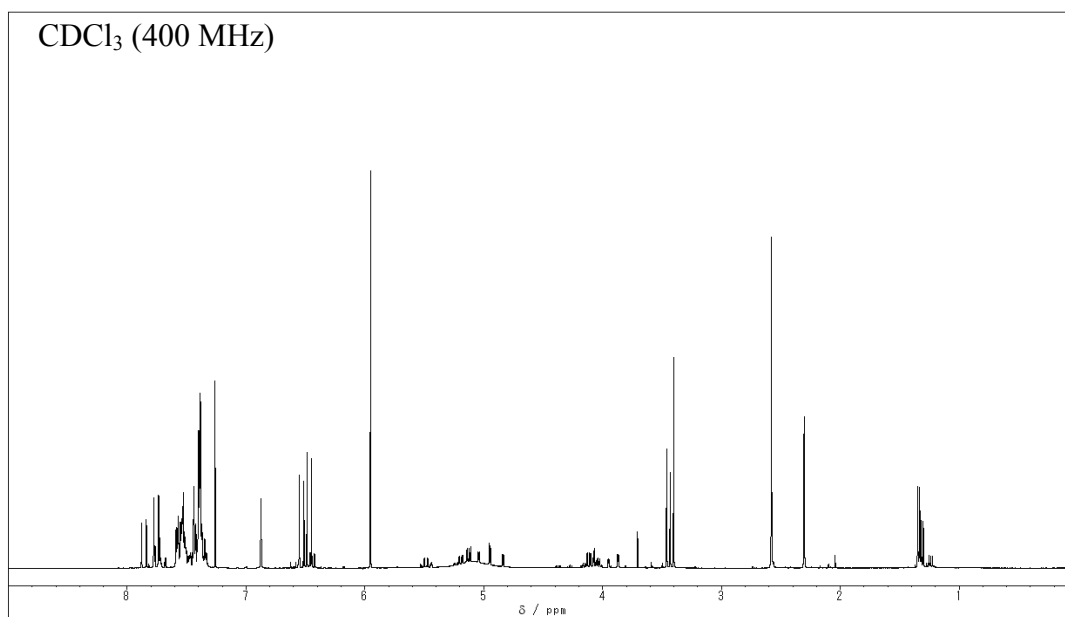

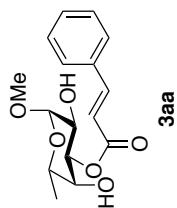

Comment TSV18006\_pure\_13C\_COSY\_2  
 0170928\_01  
 Date 2017/Sep/28  
 ObsNuc <sup>1</sup>H  
 ExMode PROTON\_001  
 ObsFreq 399.45 MHz  
 Scan 8  
 AcqTime 2.569 s  
 Acc. Interval 5.589 s  
 Spinning 16.0 Hz  
 Temperature 25.0 °C  
 Solvent cdcl<sub>3</sub>

<sup>1</sup>H-NMR spectrum of **3aa**

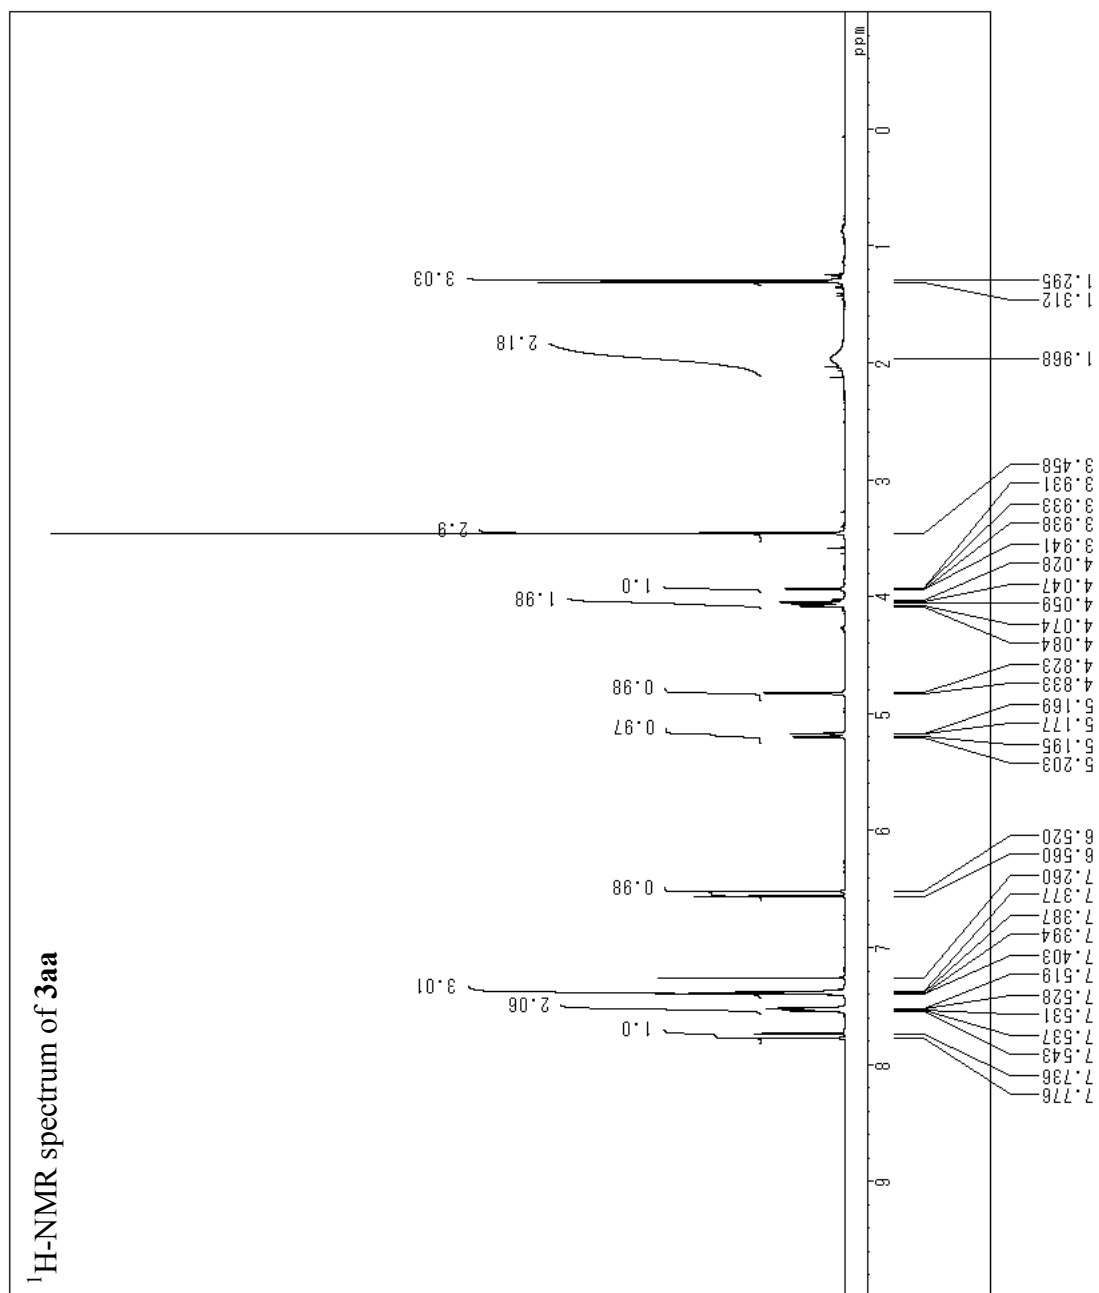

$^1\text{H}$ - $^1\text{H}$  COSY spectrum of **3aa**

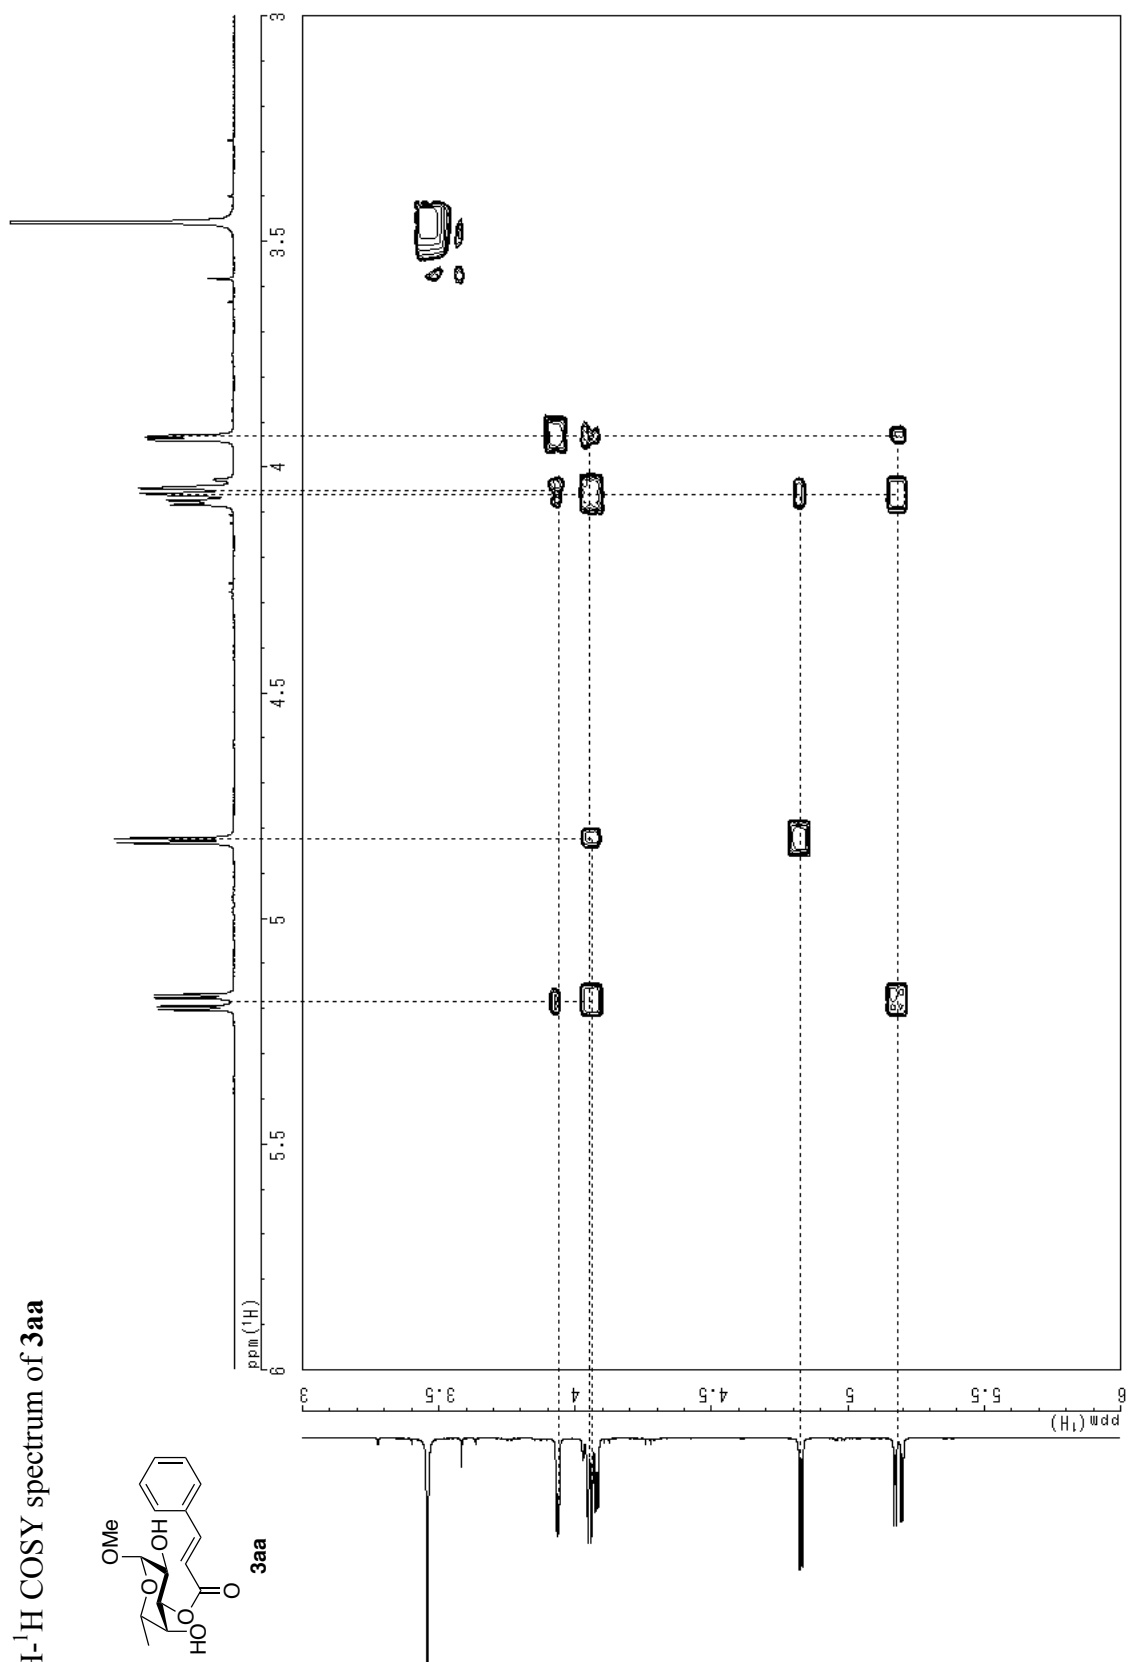

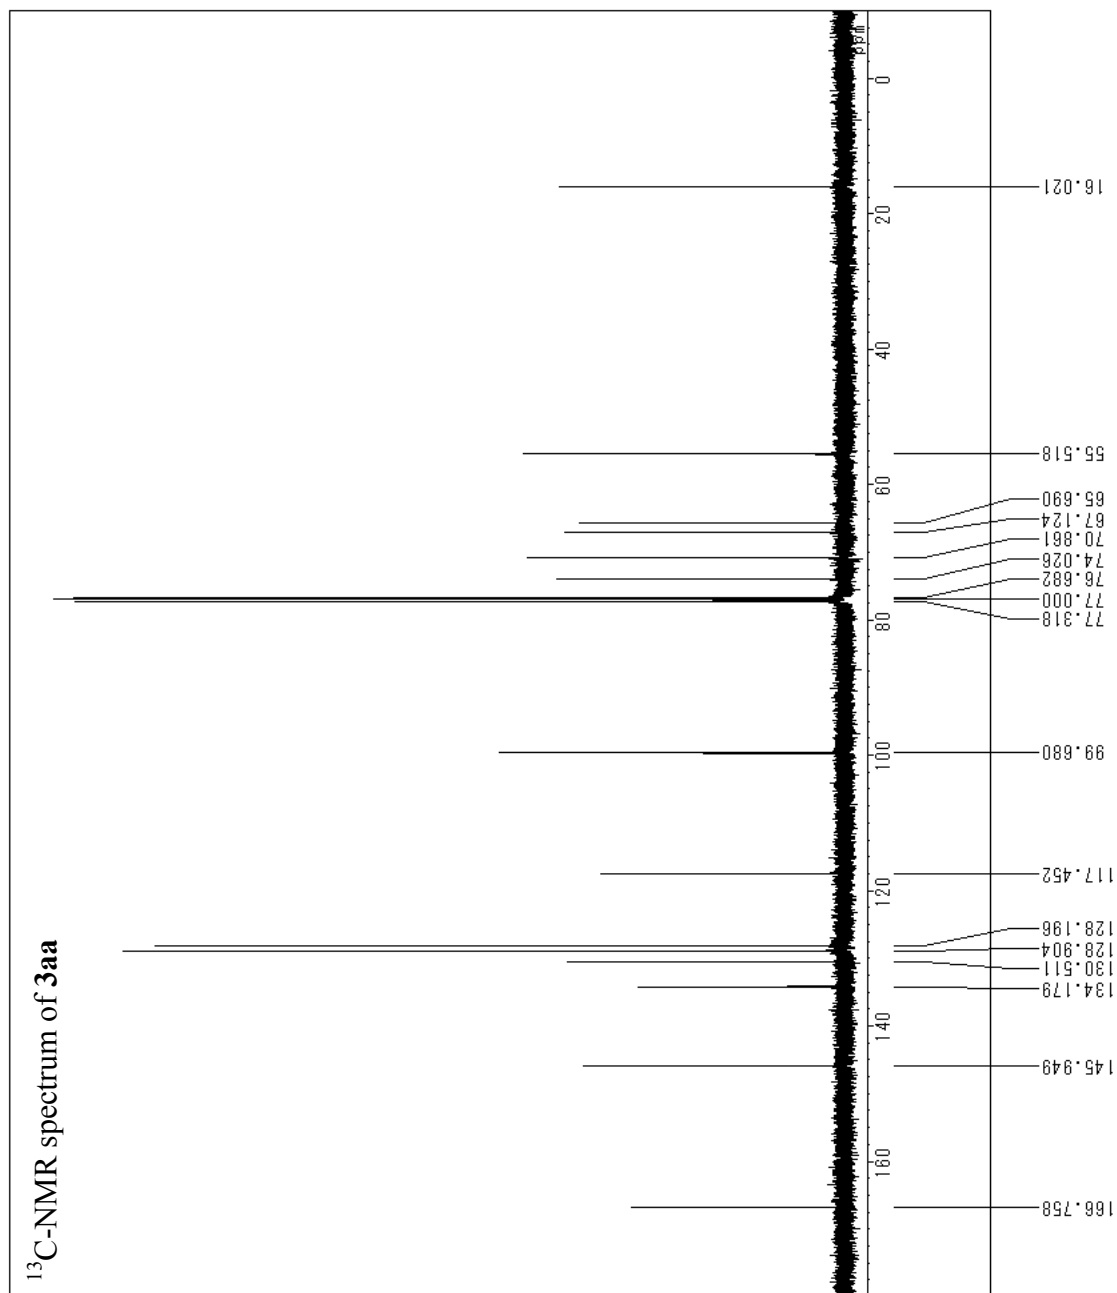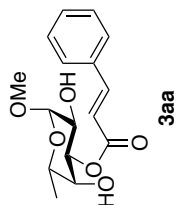

Comment TSV18006\_pure\_13C\_COSY\_2  
 0170928\_01  
 Date 2017/Sep/28  
 ObsNuc <sup>13</sup>C  
 ExMode CARBON\_001  
 ObsFreq 100.45 MHz  
 Scan 512  
 AcqTime 1.3831 s  
 Acc. Interval 3.3831 s  
 Spinning 20.0 Hz  
 Temperature 25.0 °C  
 Solvent cdcl<sub>3</sub>



Methyl 3-*O*-4-methoxycinnamoyl- $\alpha$ -L-fucopyranoside (**3ab**)

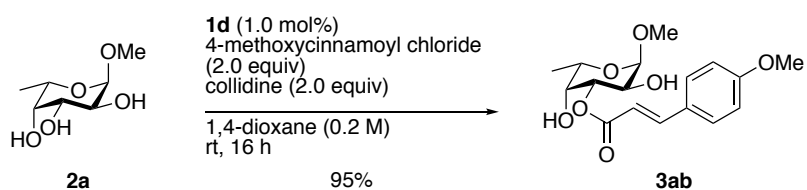

$^1\text{H}$ -NMR spectrum (crude reaction mixture in the presence of catalyst **1d**)

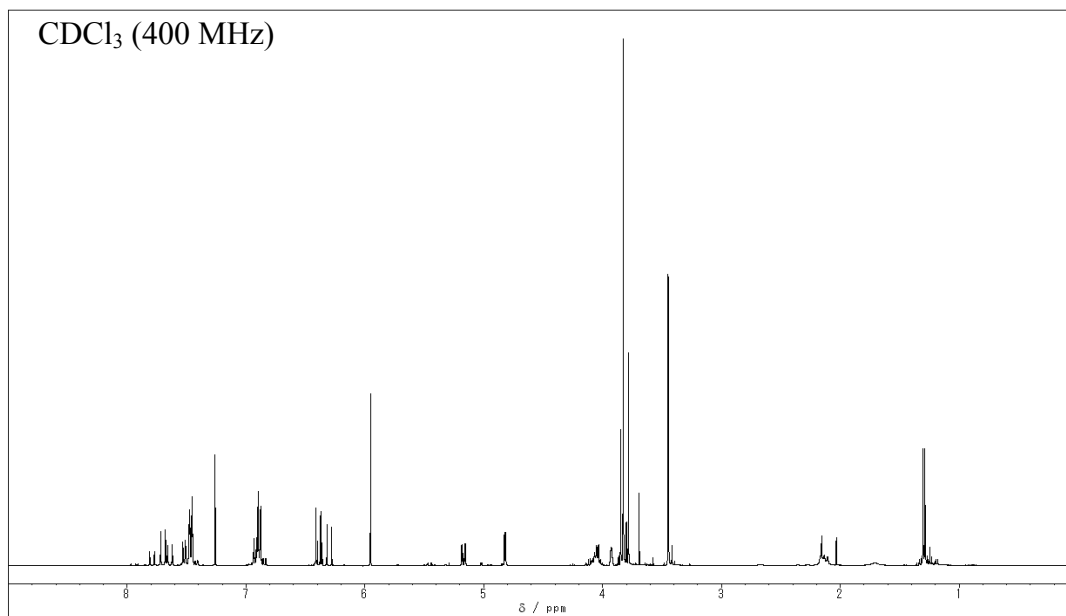

$^1\text{H}$ -NMR spectrum (crude reaction mixture in the absence of catalyst **1d**)

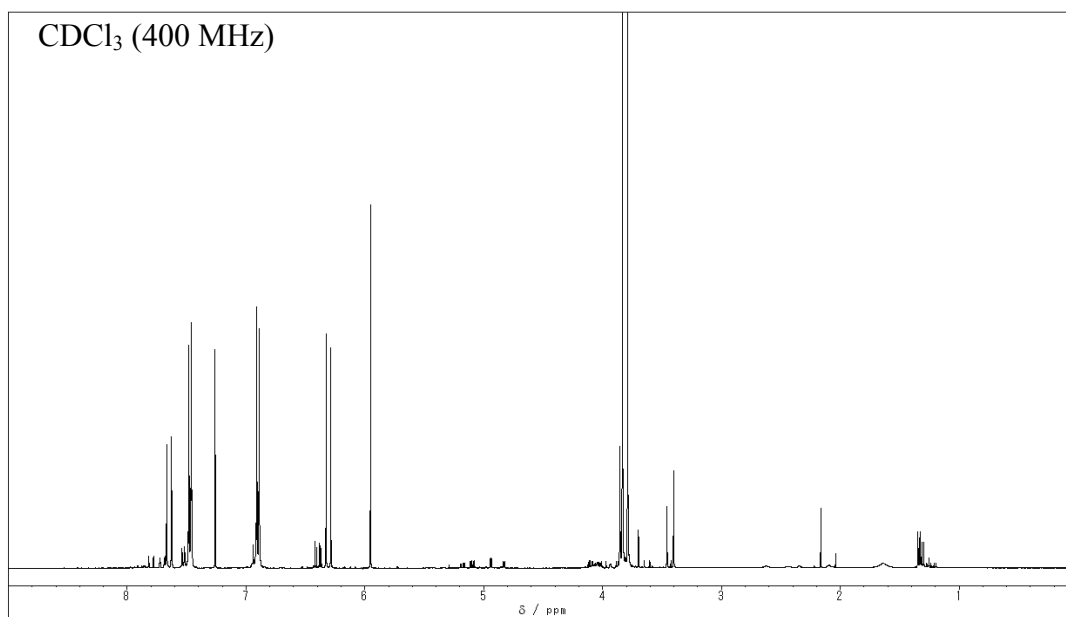

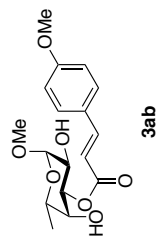

3ab

Comment TSV20034\_pure\_13C\_COSY\_2  
 0171206\_01  
 Date 2017/Dec/08  
 ObsNuc <sup>1</sup>H  
 ExMode PROTON\_001  
 ObsFreq 399.45 MHz  
 Scan 8  
 AcqTime 2.589 s  
 Acc. Interval 5.589 s  
 Spinning 16.0 Hz  
 Temperature 25.0 °C  
 Solvent cdcl<sub>3</sub>

<sup>1</sup>H-NMR spectrum of 3ab

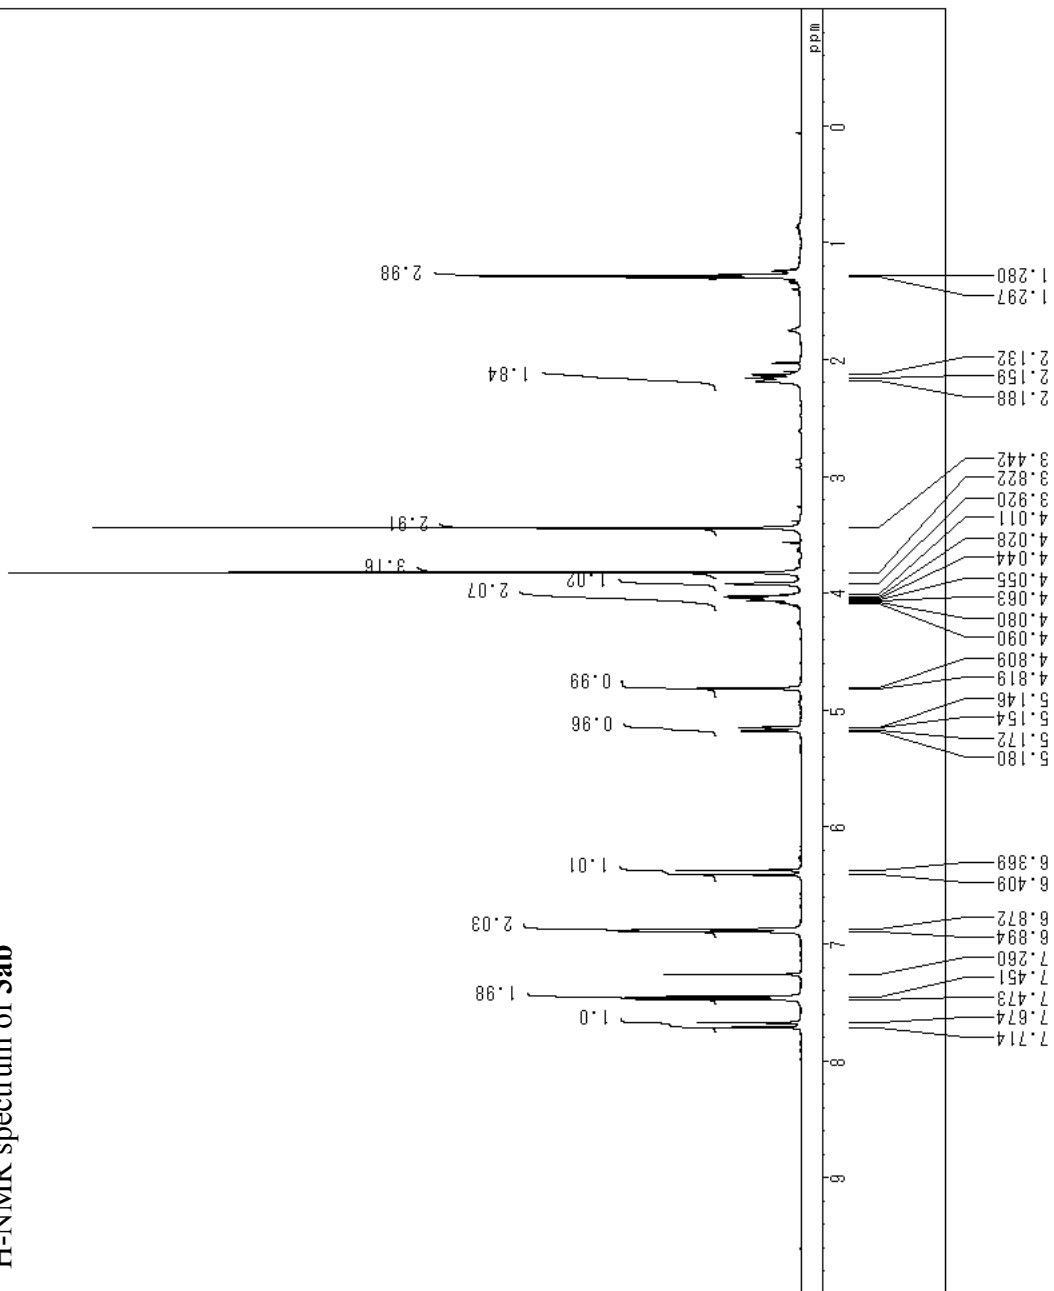

$^1\text{H}$ - $^1\text{H}$  COSY spectrum of **3ab**

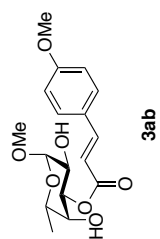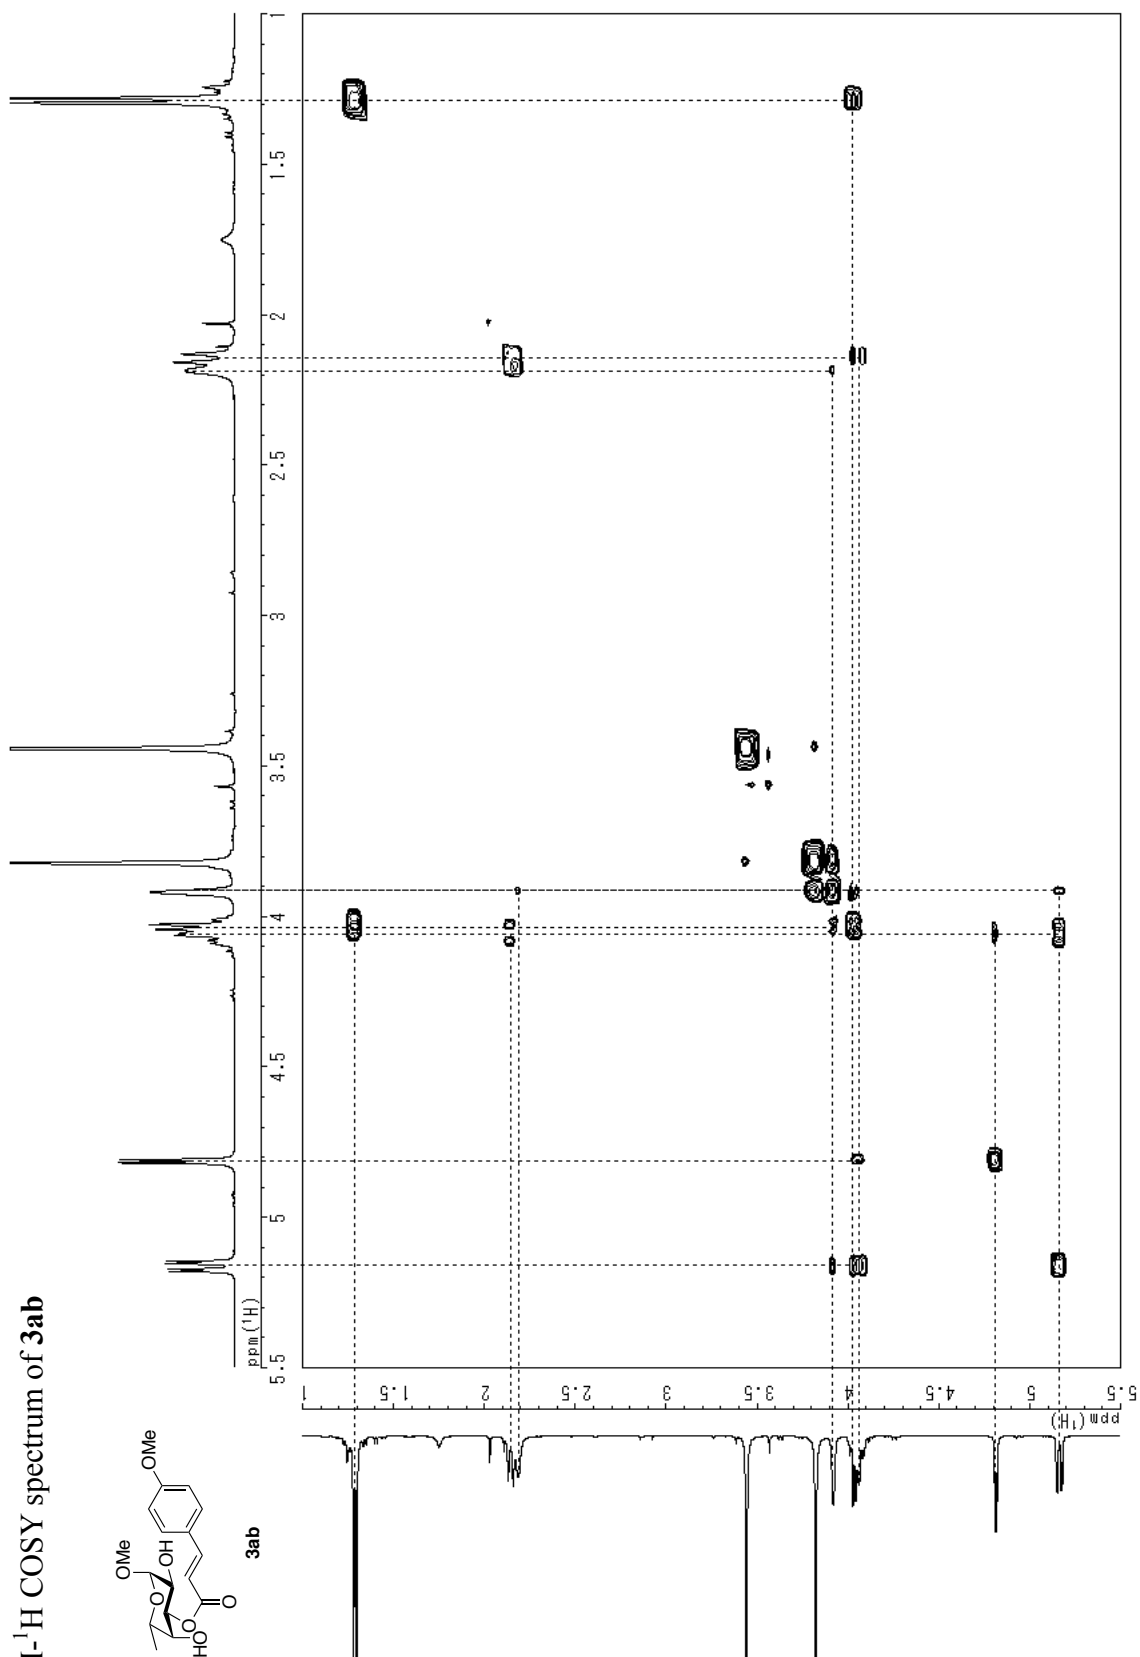

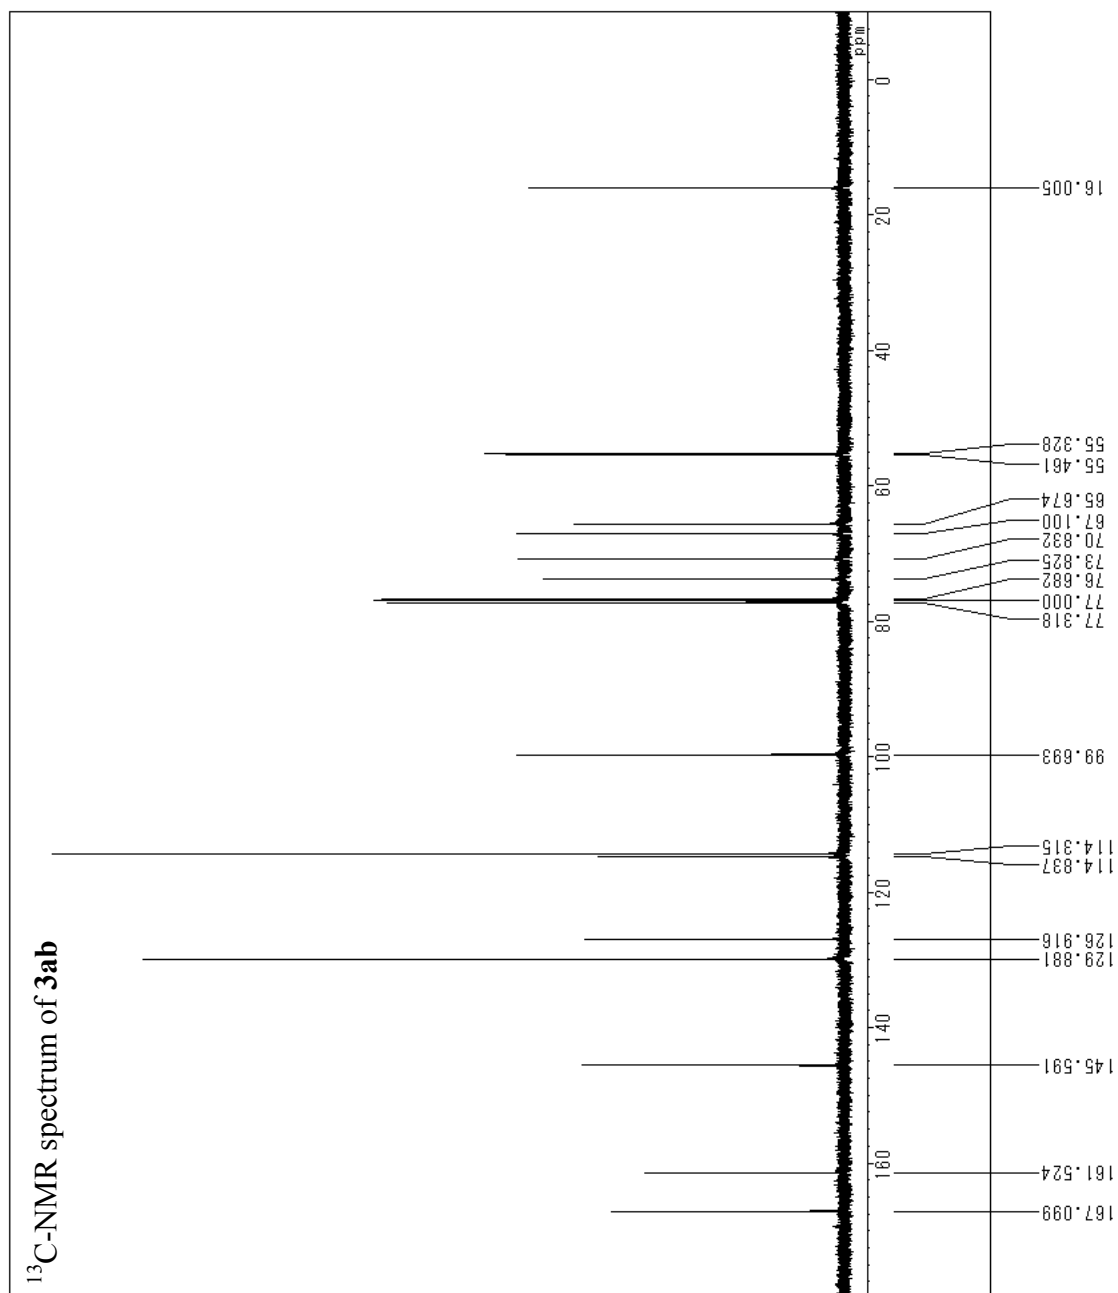

Comment TSV20034\_pure\_13C\_COSY\_2  
 0171208\_01  
 Date 2017/Dec/08  
 ObsNuc <sup>13</sup>C  
 ExMode CARBON\_001  
 ObsFreq 100.45 MHz  
 Scan 512  
 AcqTime 1.3631 s  
 Acc. Interval 3.3631 s  
 Spinning 20.0 Hz  
 Temperature 25.0 °C  
 Solvent cdcl<sub>3</sub>

Methyl 3-*O*-3,4-dimethoxycinnamoyl- $\alpha$ -L-fucopyranoside (**3ac**)

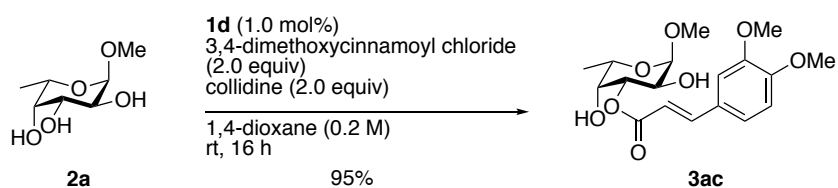

$^1\text{H}$ -NMR spectrum (crude reaction mixture in the presence of catalyst **1d**)

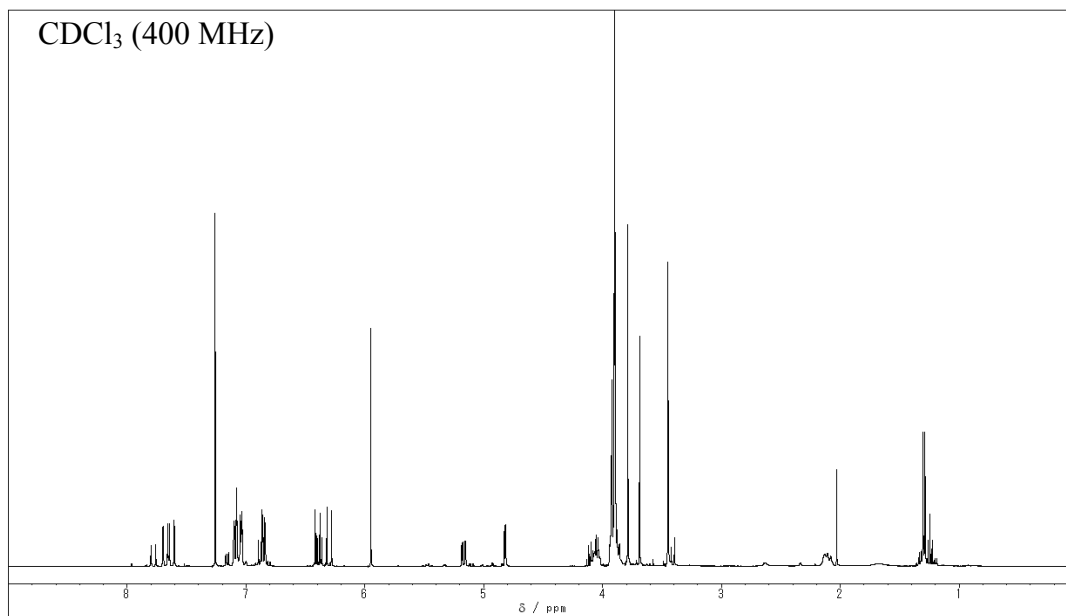

$^1\text{H}$ -NMR spectrum (crude reaction mixture in the absence of catalyst **1d**)

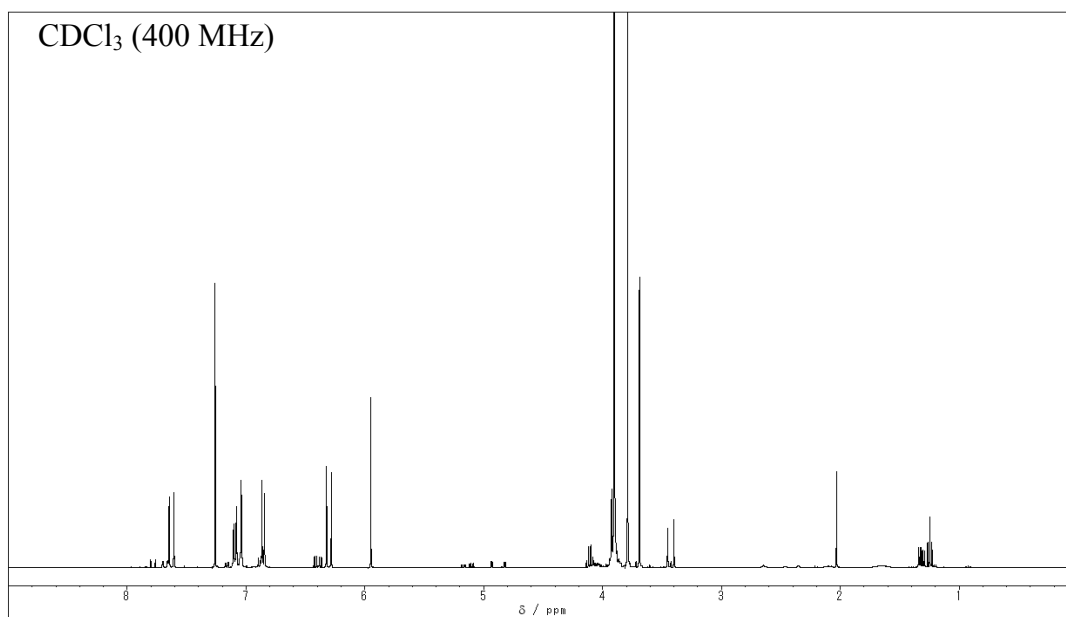

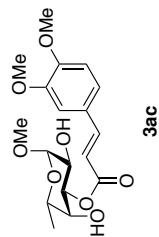

**3ac**

Comment TSV20036\_pure\_13C\_COSY\_2  
 0180124\_01  
 Date 2018/Jan/24  
 ObsNuc <sup>1</sup>H  
 ExMode PROTON\_001  
 ObsFreq 400.27 MHz  
 Scan 8  
 AcqTime 2.5559 s  
 Acc. Interval 5.5559 s  
 Spinning 16.0 Hz  
 Temperature 25.0 °C  
 Solvent cdcl<sub>3</sub>

<sup>1</sup>H-NMR spectrum of **3ac**

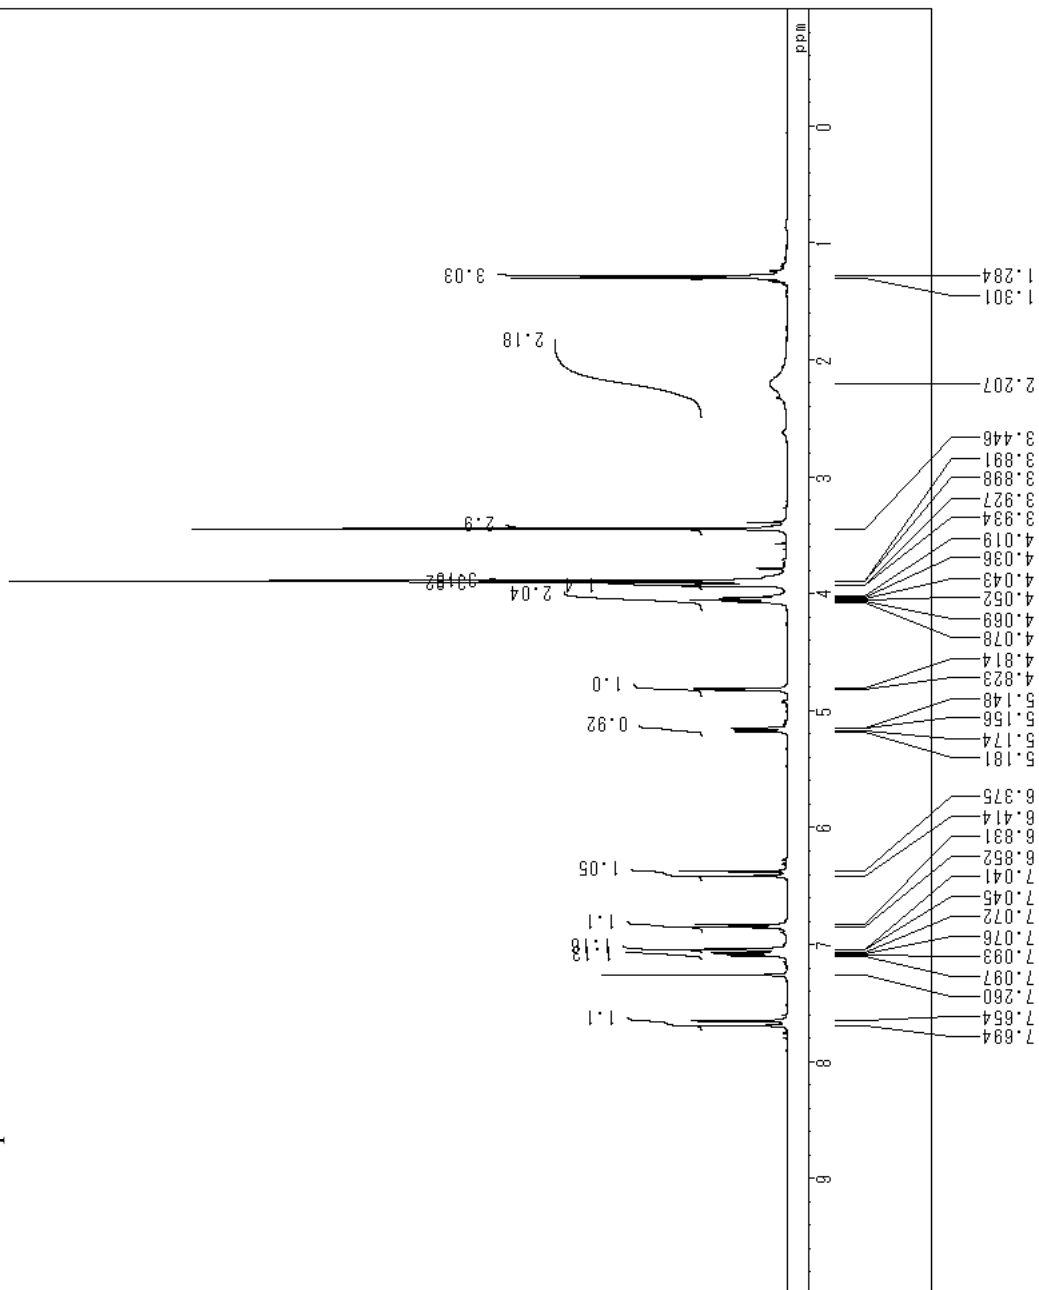

$^1\text{H}$ - $^1\text{H}$  COSY spectrum of **3ac**

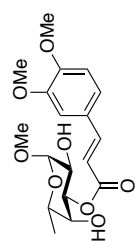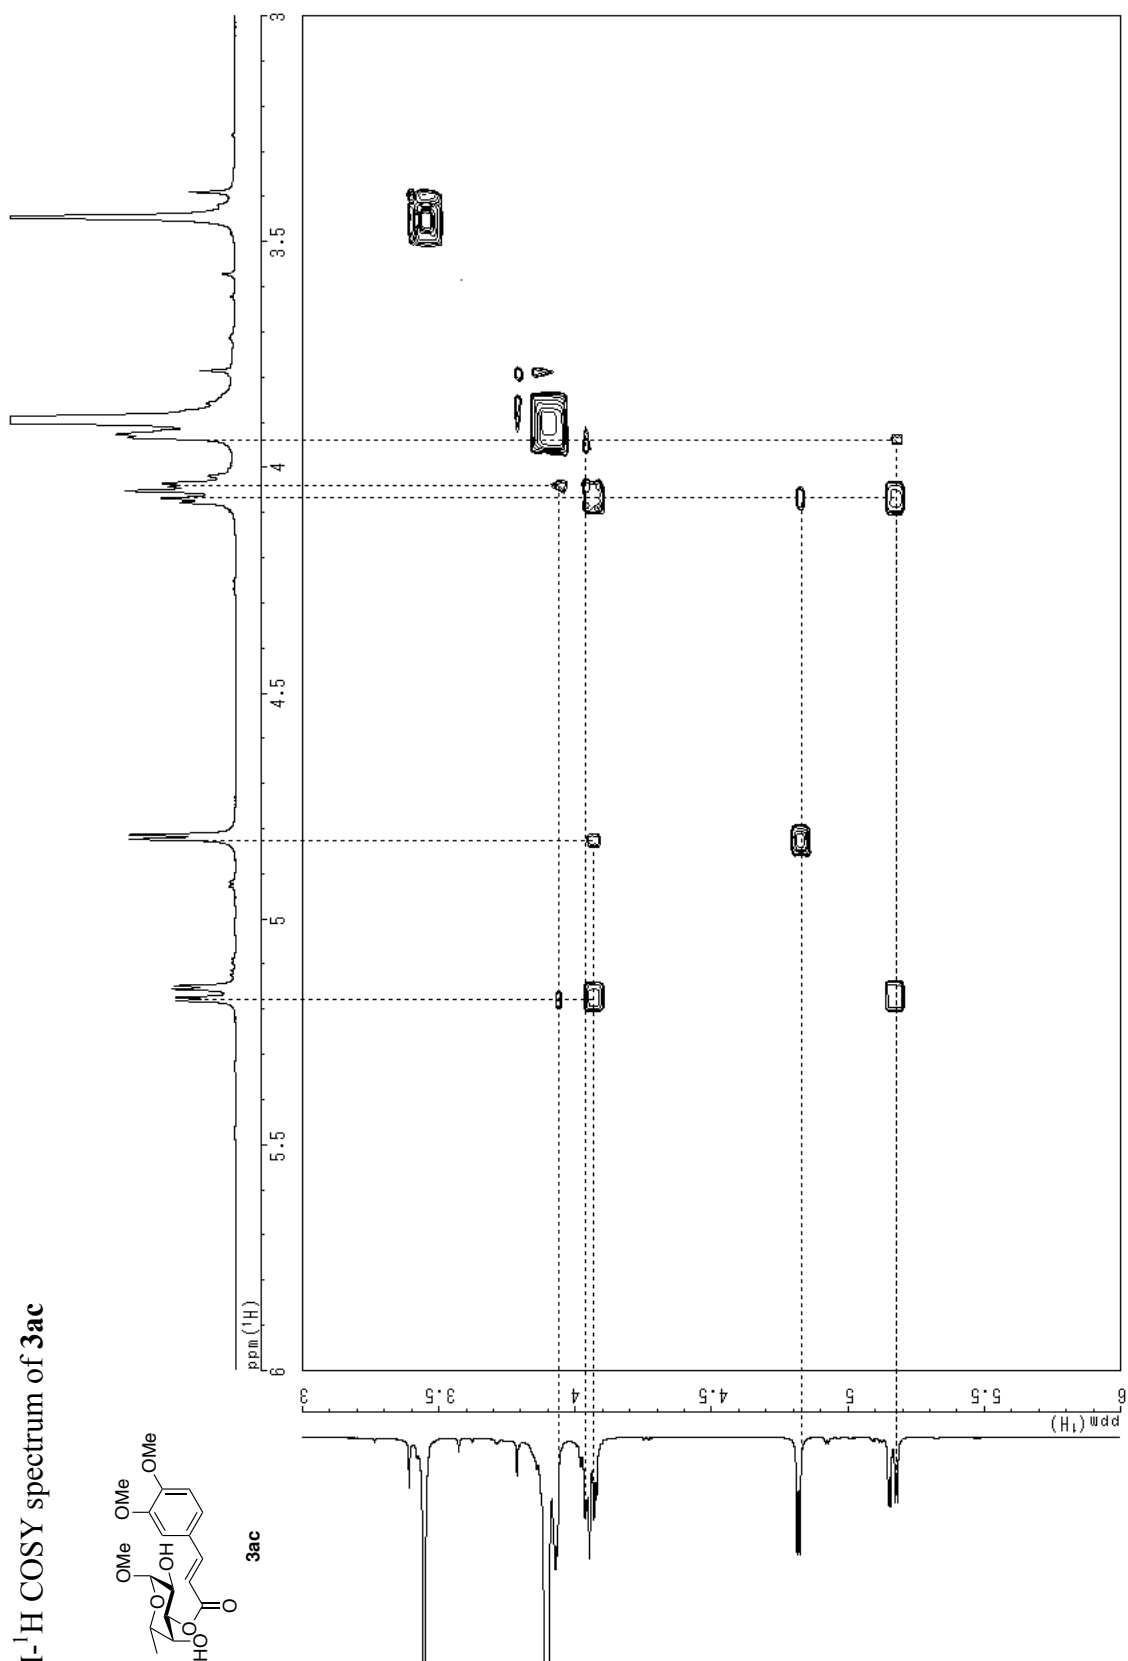

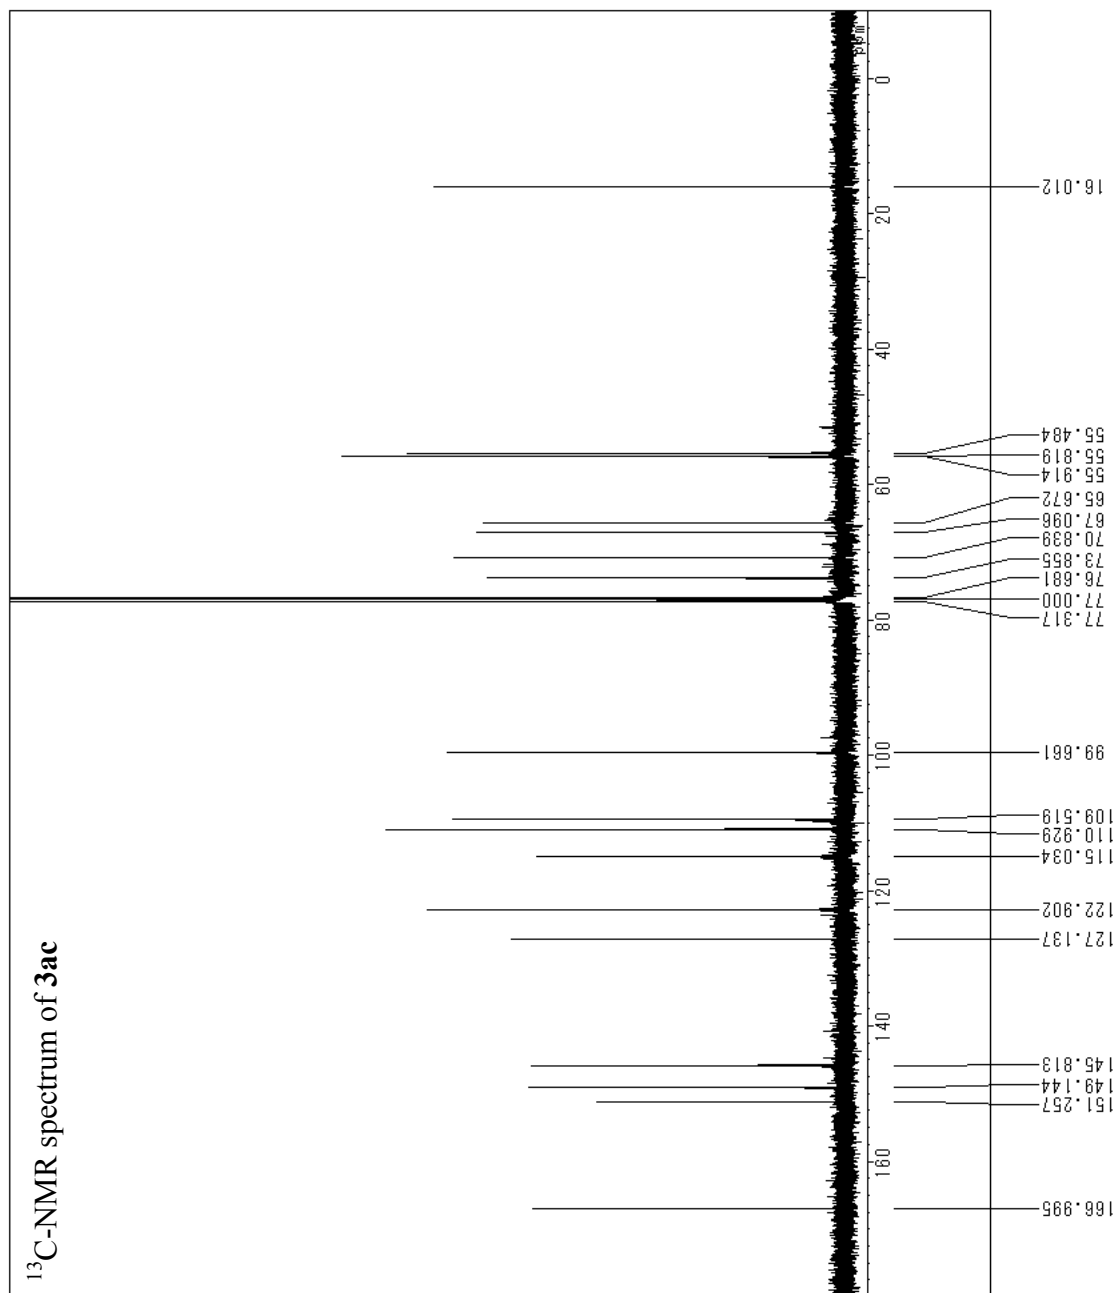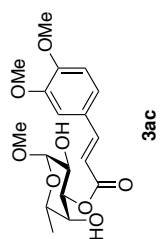

Comment TSV20036\_pure\_13C\_COSY\_2  
 0180124\_01  
 Date 2018/Jan/24  
 ObsNuc <sup>13</sup>C  
 ExMode CARBON\_001  
 ObsFreq 100.66 MHz  
 Scan 432  
 AcqTime 1.3831 s  
 Acc. Interval 3.3831 s  
 Spinning 20.0 Hz  
 Temperature 25.0 °C  
 Solvent cdcl<sub>3</sub>



Methyl 3-*O*-3,3-dimethylacryloyl- $\alpha$ -L-fucopyranoside (**3ad**)

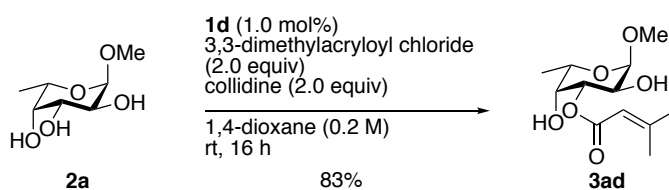

$^1\text{H}$ -NMR spectrum (crude reaction mixture in the presence of catalyst **1d**)

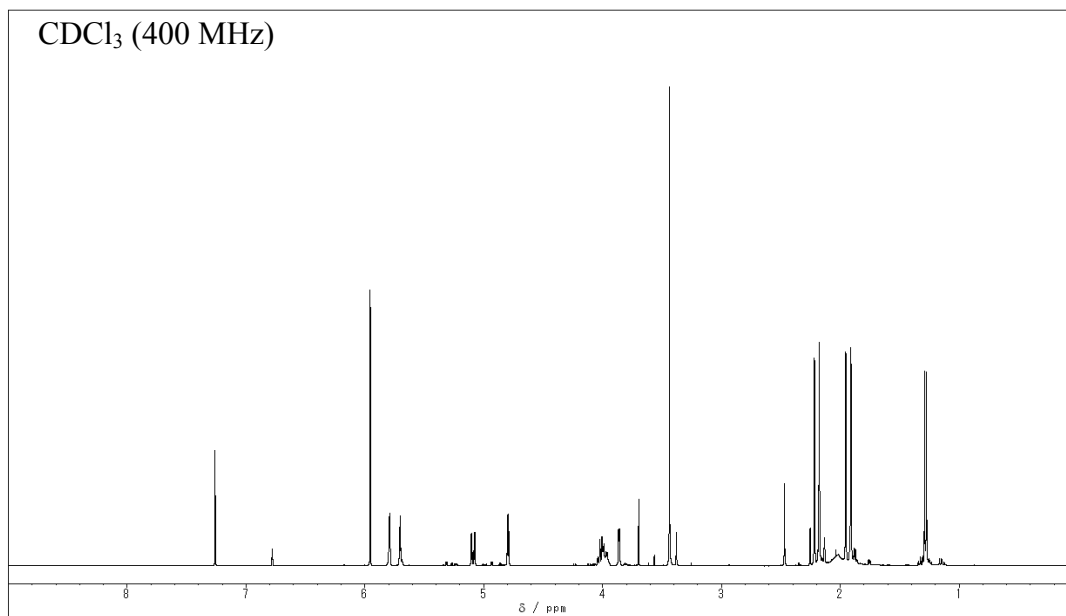

$^1\text{H}$ -NMR spectrum (crude reaction mixture in the absence of catalyst **1d**)

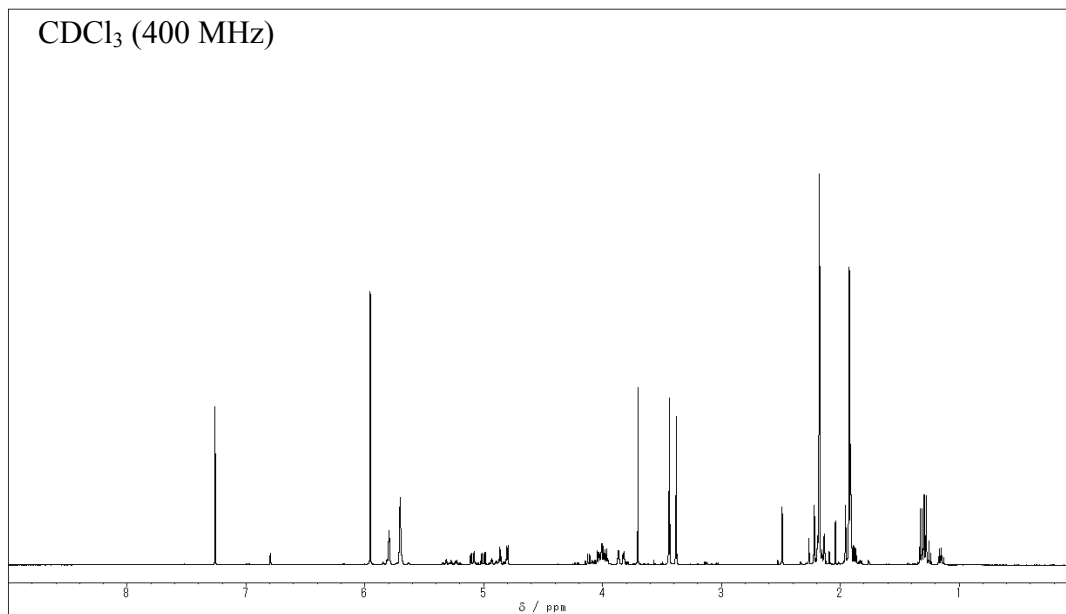

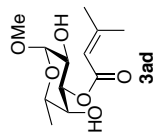

<sup>1</sup>H-NMR spectrum of 3ad

Comment TSV13020\_COSY\_20170224\_0  
 Date 2017/Feb/24  
 ObsNuc <sup>1</sup>H  
 ExMode PROTON\_001  
 ObsFreq 399.45 MHz  
 Scan 16  
 AcqTime 2.589 s  
 Acc. Interval 5.589 s  
 Spinning 16.0 Hz  
 Temperature 25.0 °C  
 Solvent cdcl<sub>3</sub>

S222

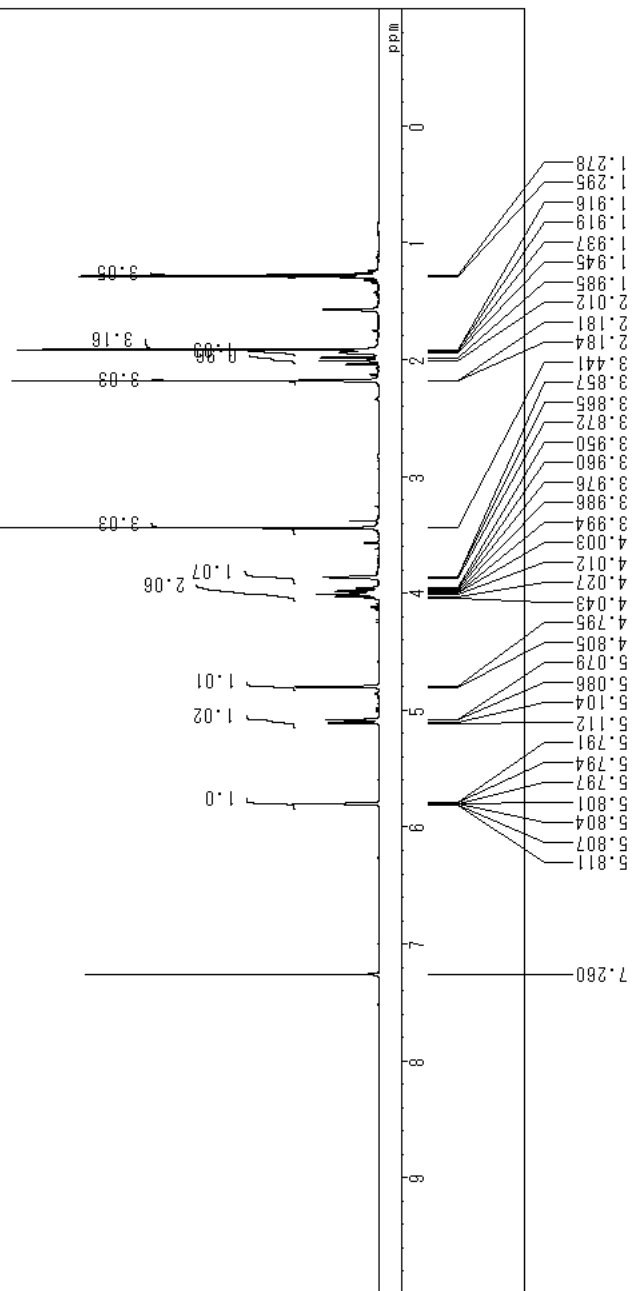

$^1\text{H}$ - $^1\text{H}$  COSY spectrum of **3ad**

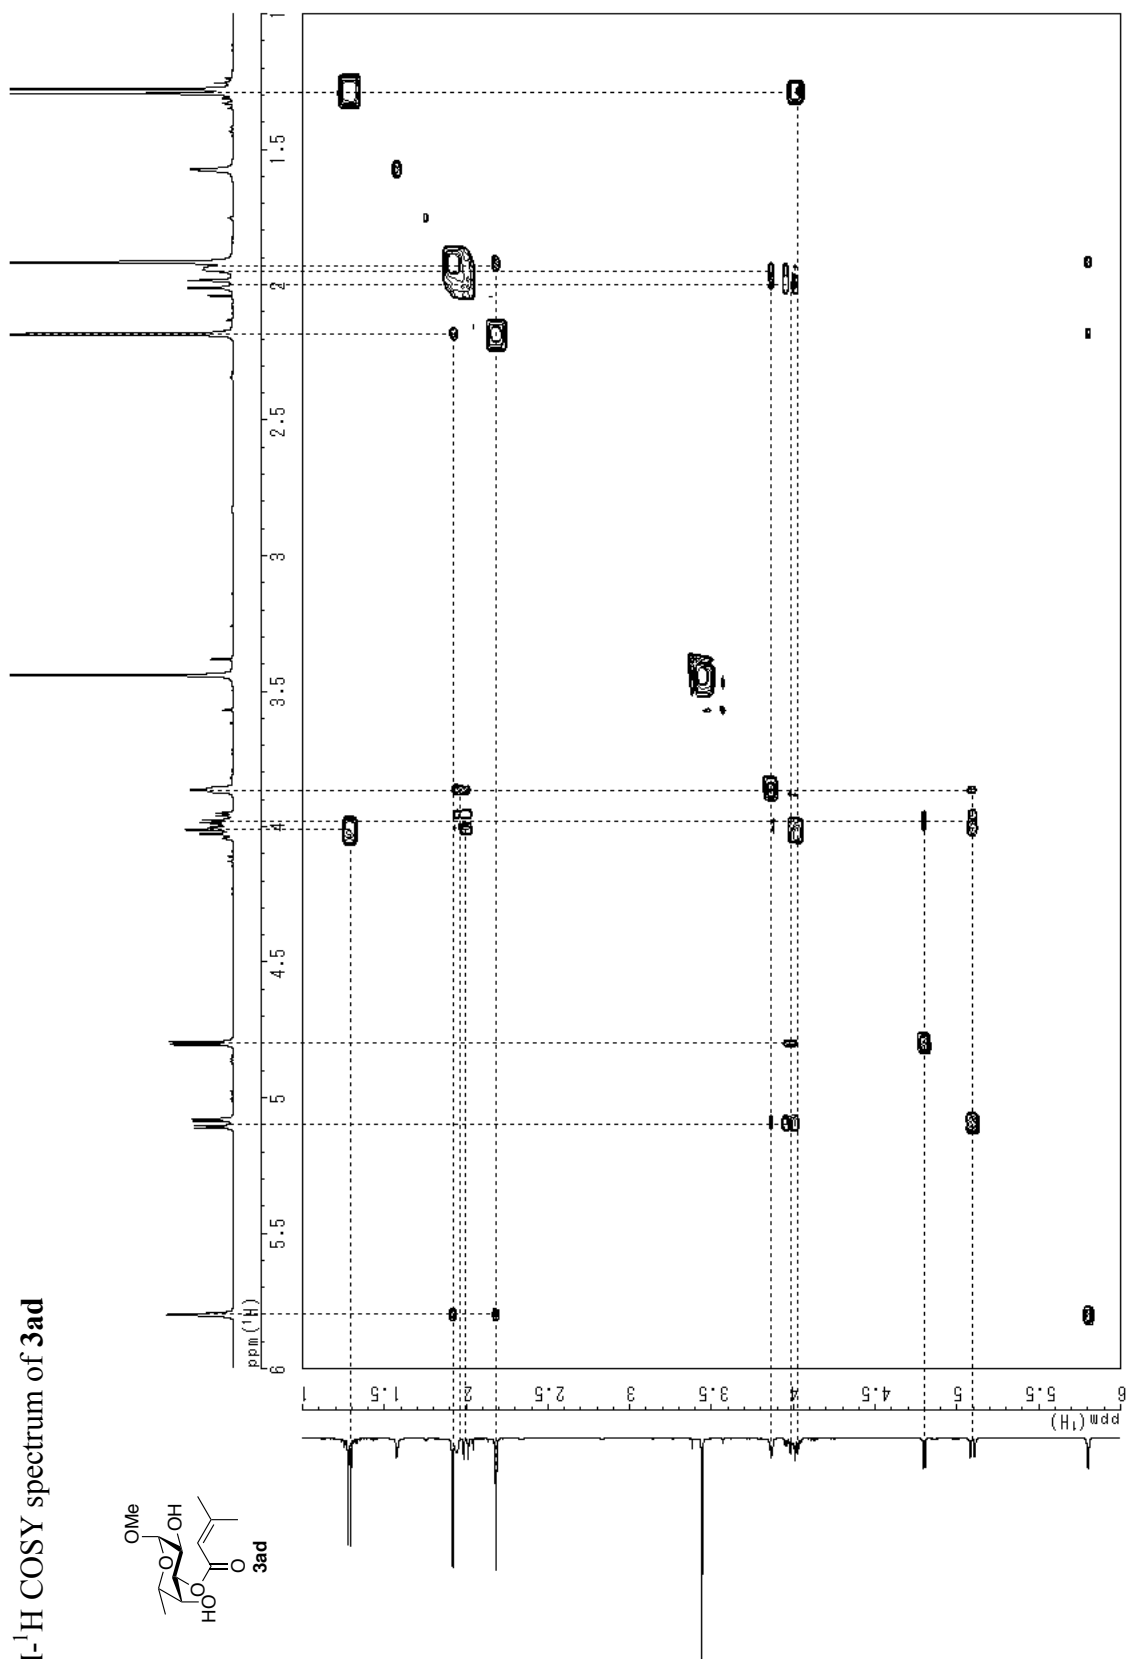

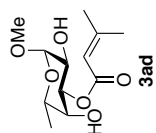

Comment TSV13020\_13C\_20170224\_01  
 Date 2017/Feb/24  
 ObsNuc <sup>13</sup>C  
 ExMode CARBON\_001  
 ObsFreq 100.45 MHz  
 Scan 512  
 AcqTime 1.3631 s  
 Acc. Interval 3.3631 s  
 Spinning 20.0 Hz  
 Temperature 25.0 °C  
 Solvent cdcl<sub>3</sub>

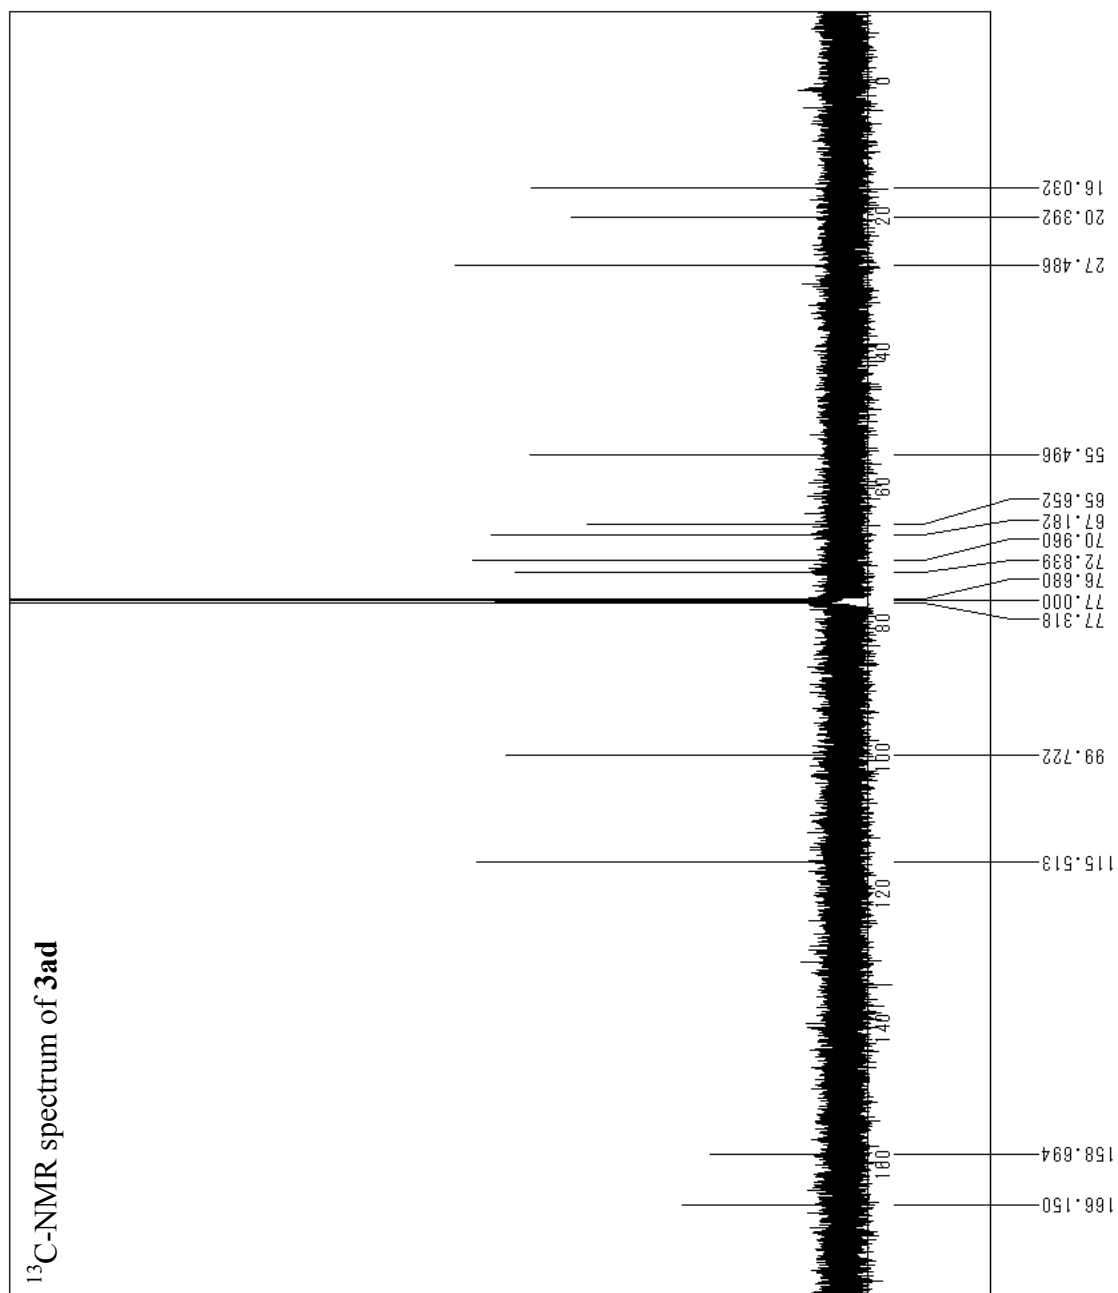

Methyl 3-*O*-benzyloxycarbonyl- $\alpha$ -L-fucopyranoside (**3ae**)

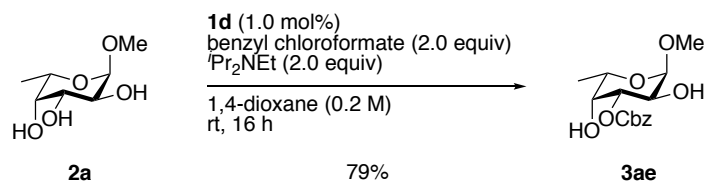

$^1\text{H}$ -NMR spectrum (crude reaction mixture in the presence of catalyst **1d**)

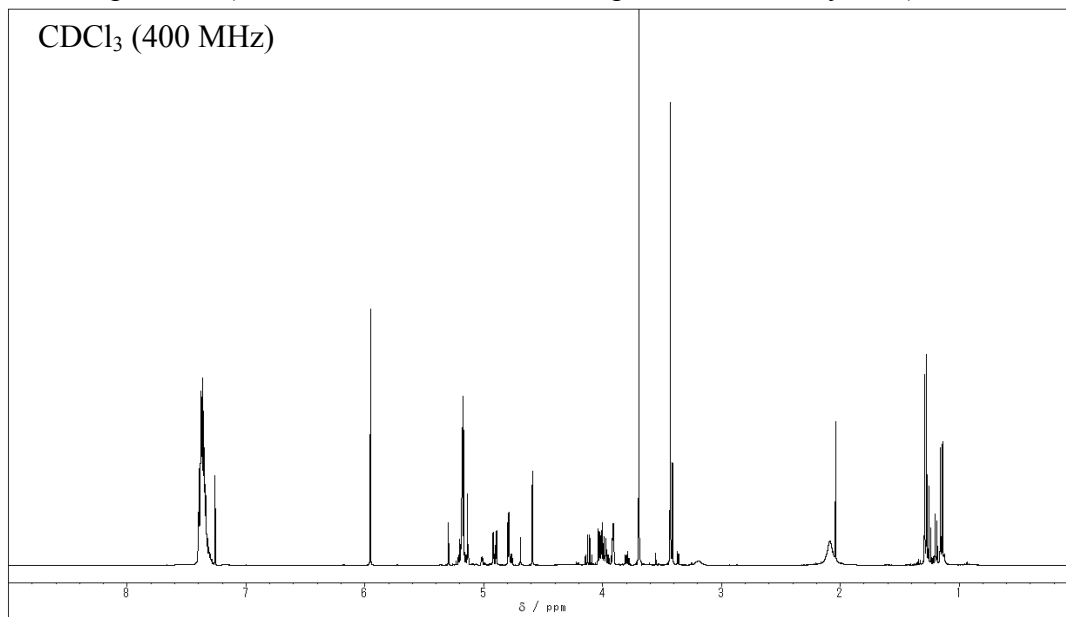

$^1\text{H}$ -NMR spectrum (crude reaction mixture in the absence of catalyst **1d**)

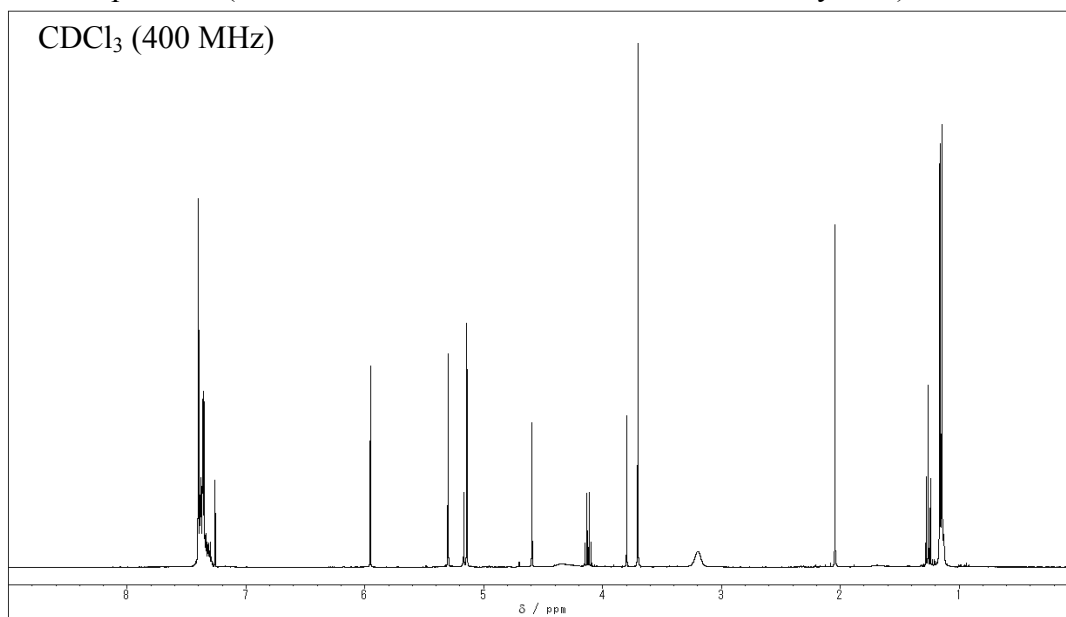

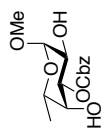

3ae

Comment TSV21019\_pure\_COSY\_20180  
 204\_01  
 Date 2018/Feb/04  
 ObsNuc <sup>1</sup>H  
 ExMode PROTON\_001  
 ObsFreq 399.45 MHz  
 Scan 16  
 AcqTime 2.589 s  
 Acc. Interval 5.589 s  
 Spinning 16.0 Hz  
 Temperature 25.0 °C  
 Solvent cdcl<sub>3</sub>

<sup>1</sup>H-NMR spectrum of 3ae

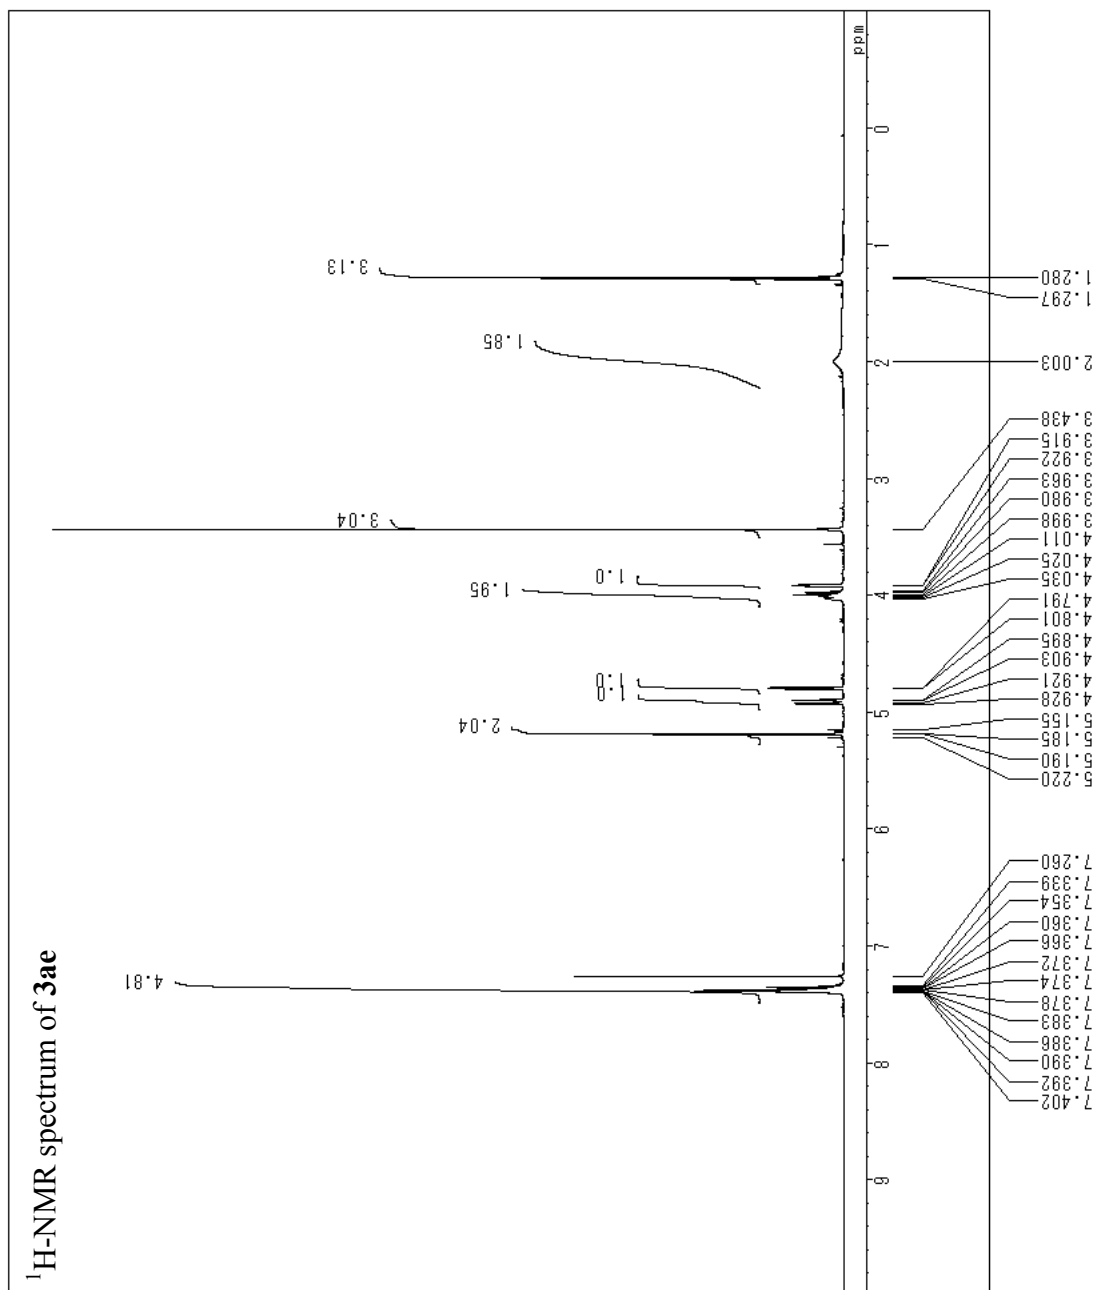

$^1\text{H}$ - $^1\text{H}$  COSY spectrum of **3ae**

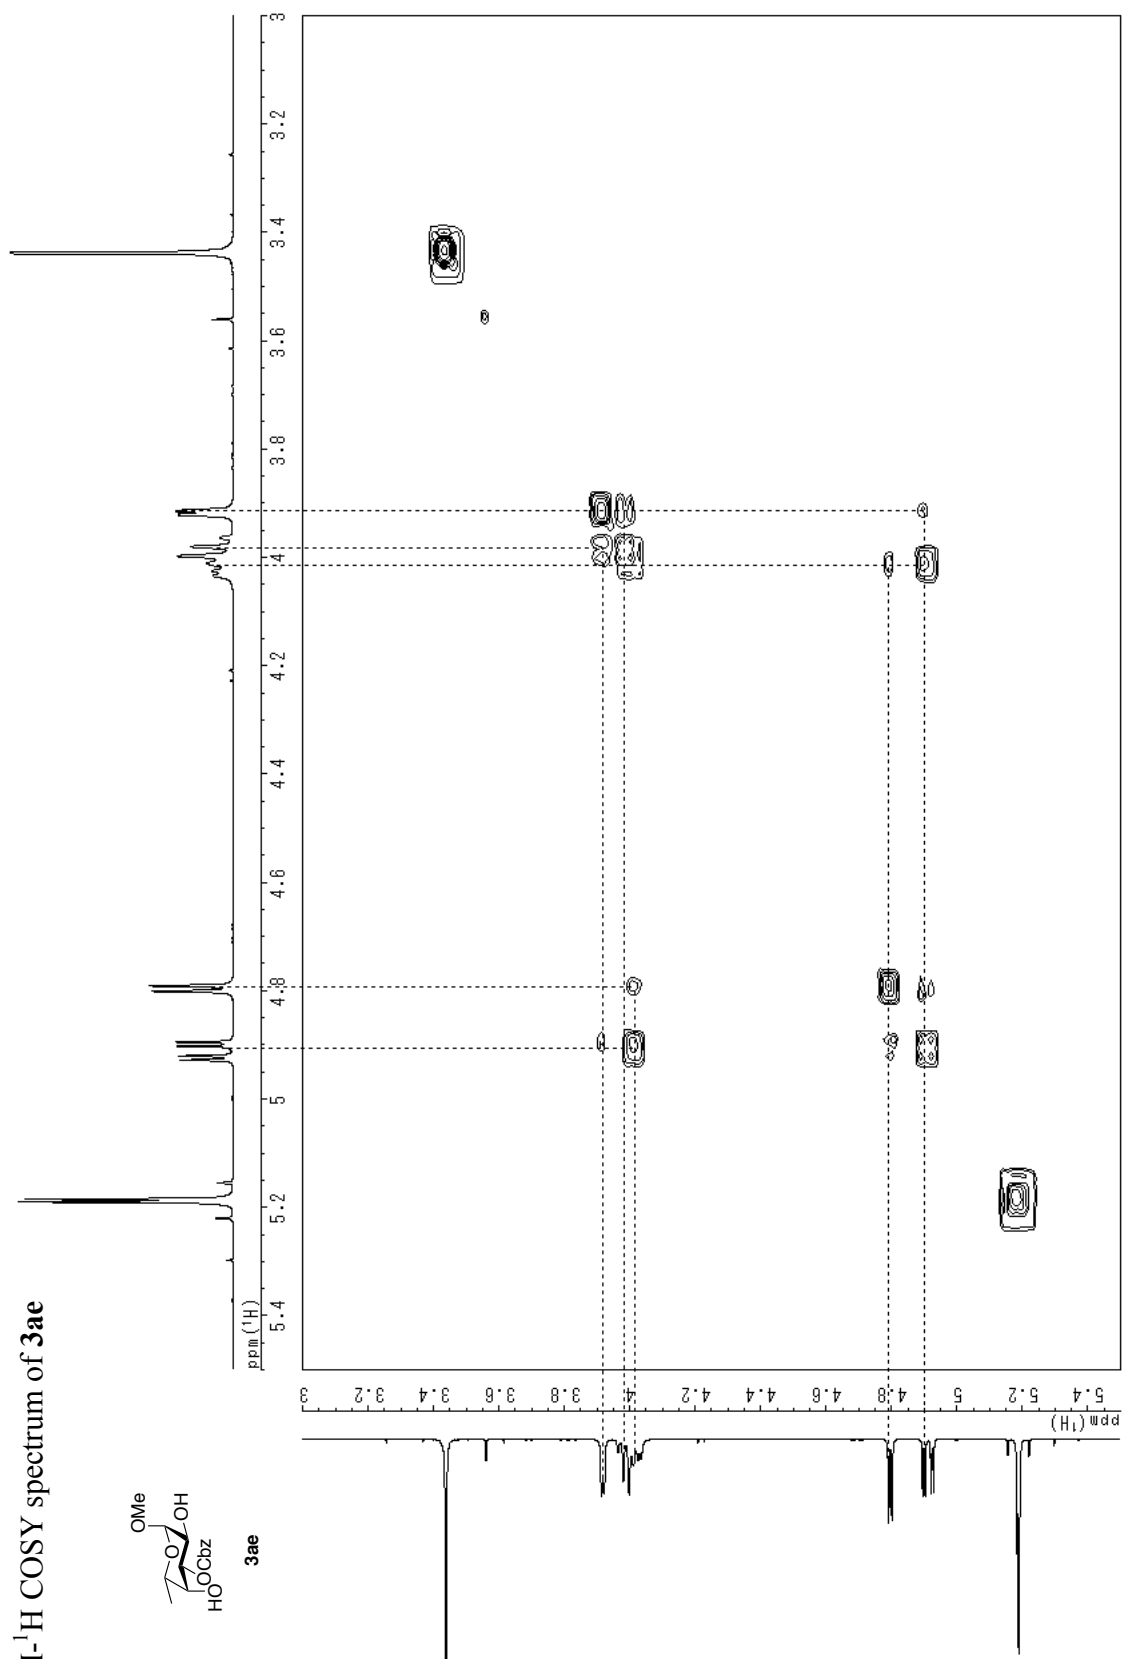

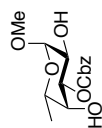

3ae

Comment TAO-18-22-17-27\_20180108  
 Date\_01 2018/Jan/08  
 ObsNuc <sup>13</sup>C  
 ExMode CARBON\_001  
 ObsFreq 100.66 MHz  
 Scan 96  
 AcqTime 1.3831 s  
 Acc. Interval 3.3831 s  
 Spinning 20.0 Hz  
 Temperature 25.0 °C  
 Solvent cdcl<sub>3</sub>

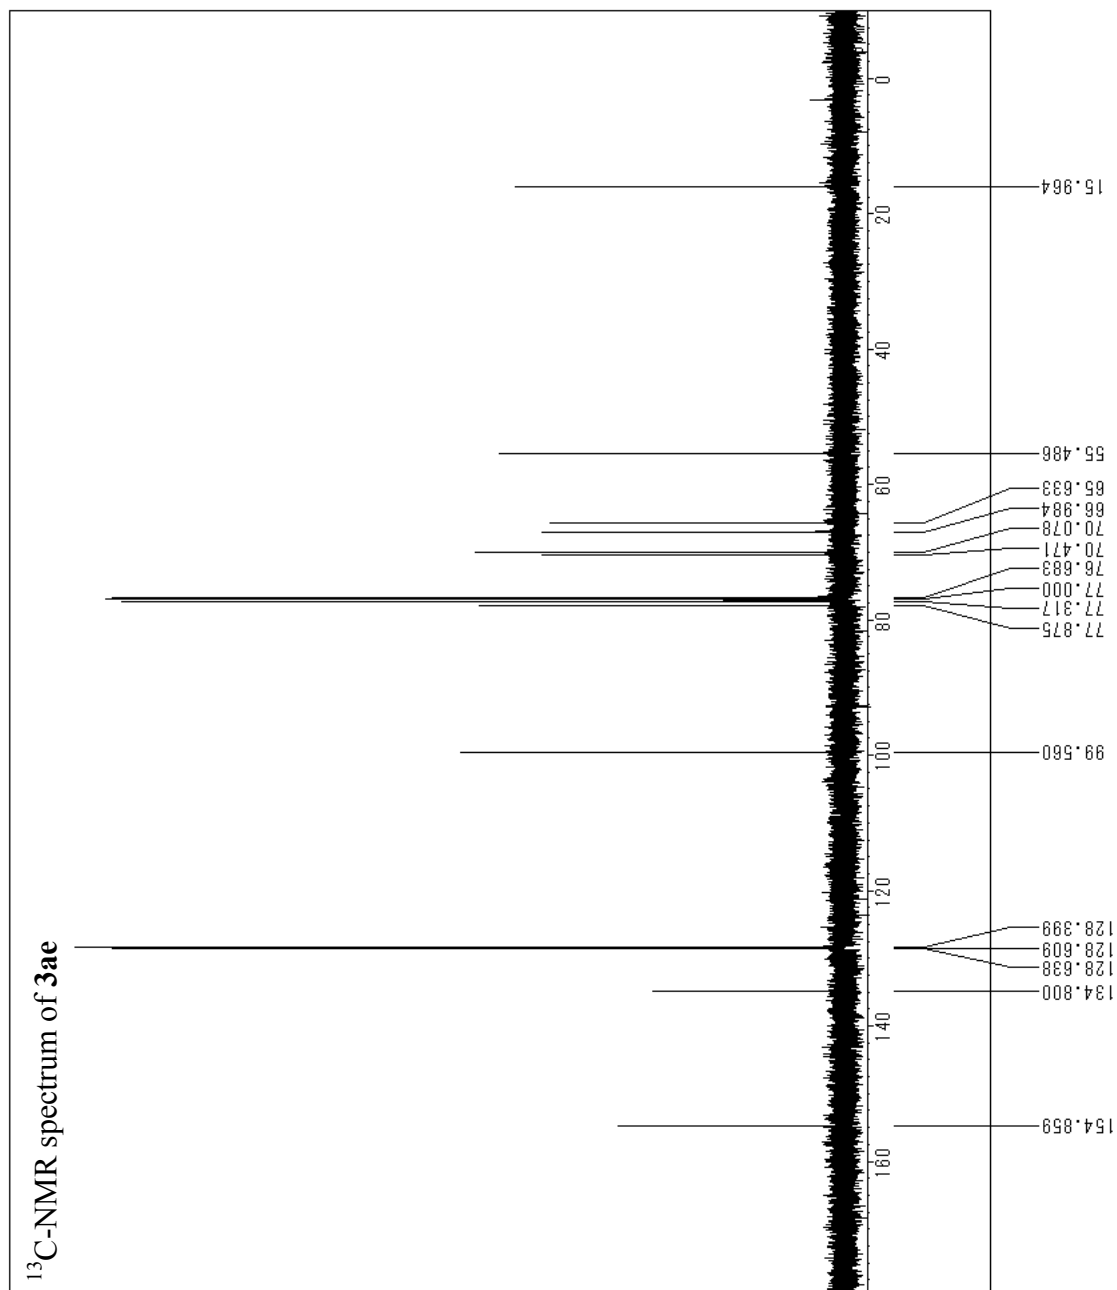



Methyl 3-*O*-2,2,2-trichloroethyloxycarbonyl- $\alpha$ -L-fucopyranoside (**3af**)

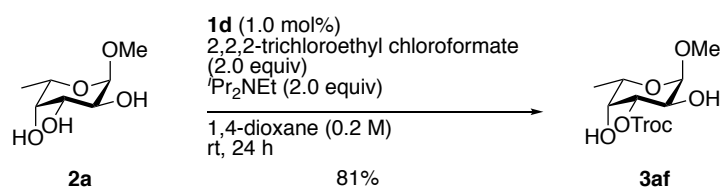

$^1\text{H}$ -NMR spectrum (crude reaction mixture in the presence of catalyst **1d**)

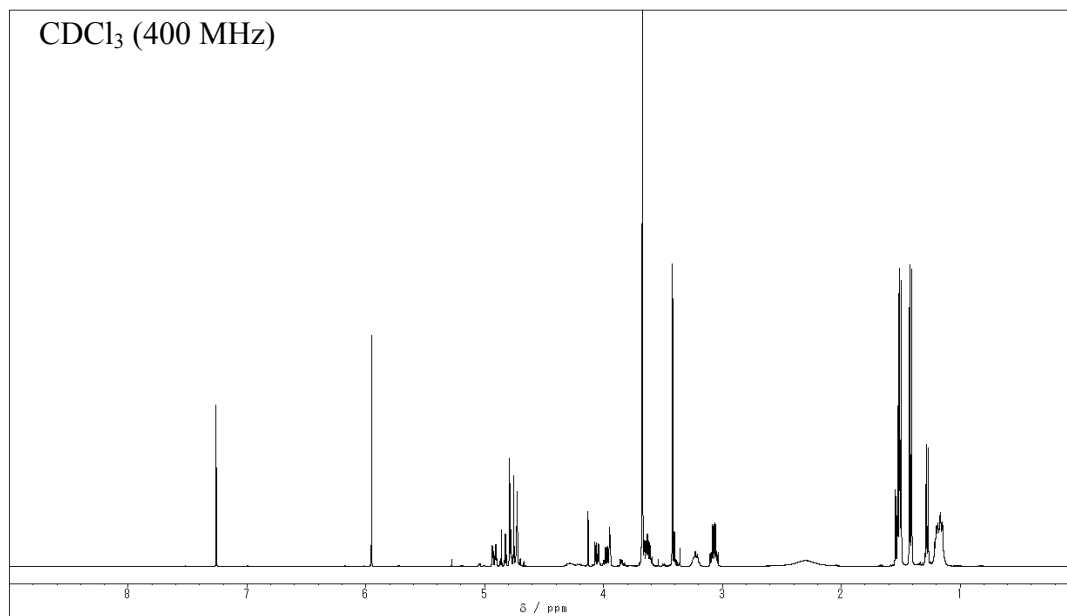

$^1\text{H}$ -NMR spectrum (crude reaction mixture in the absence of catalyst **1d**)

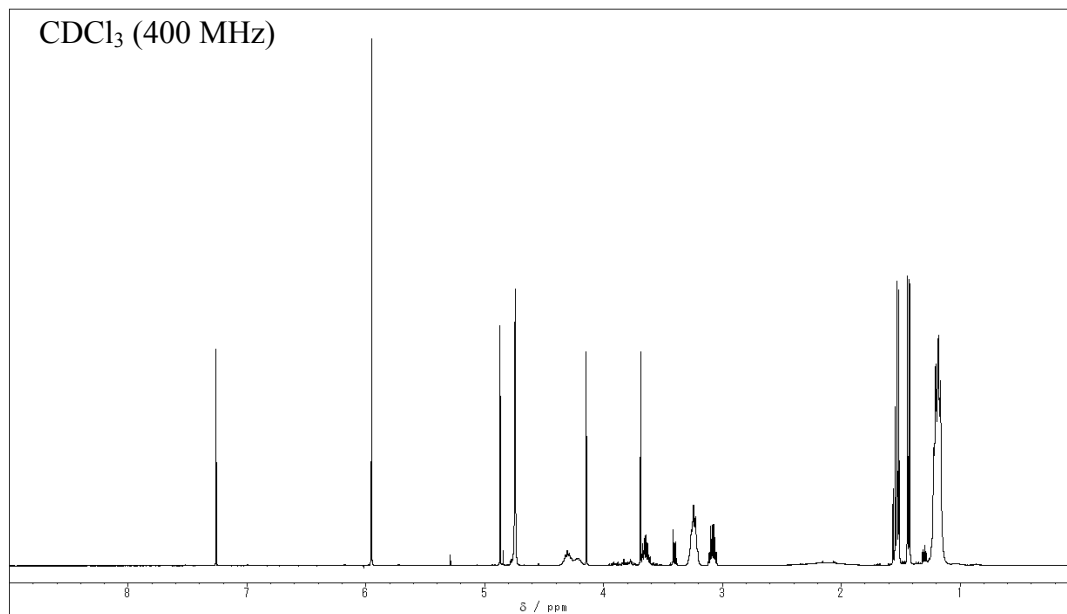

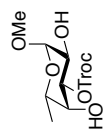

**3af**

Comment TSV19018\_pure\_13C\_COSY\_2  
 0171018\_01  
 Date 2017/Oct/18  
 ObsNuc <sup>1</sup>H  
 ExMode PROTON\_001  
 ObsFreq 399.45 MHz  
 Scan 8  
 AcqTime 2.589 s  
 Acc. Interval 5.589 s  
 Spinning 18.0 Hz  
 Temperature 25.0 °C  
 Solvent cdcl<sub>3</sub>

<sup>1</sup>H-NMR spectrum of **3af**

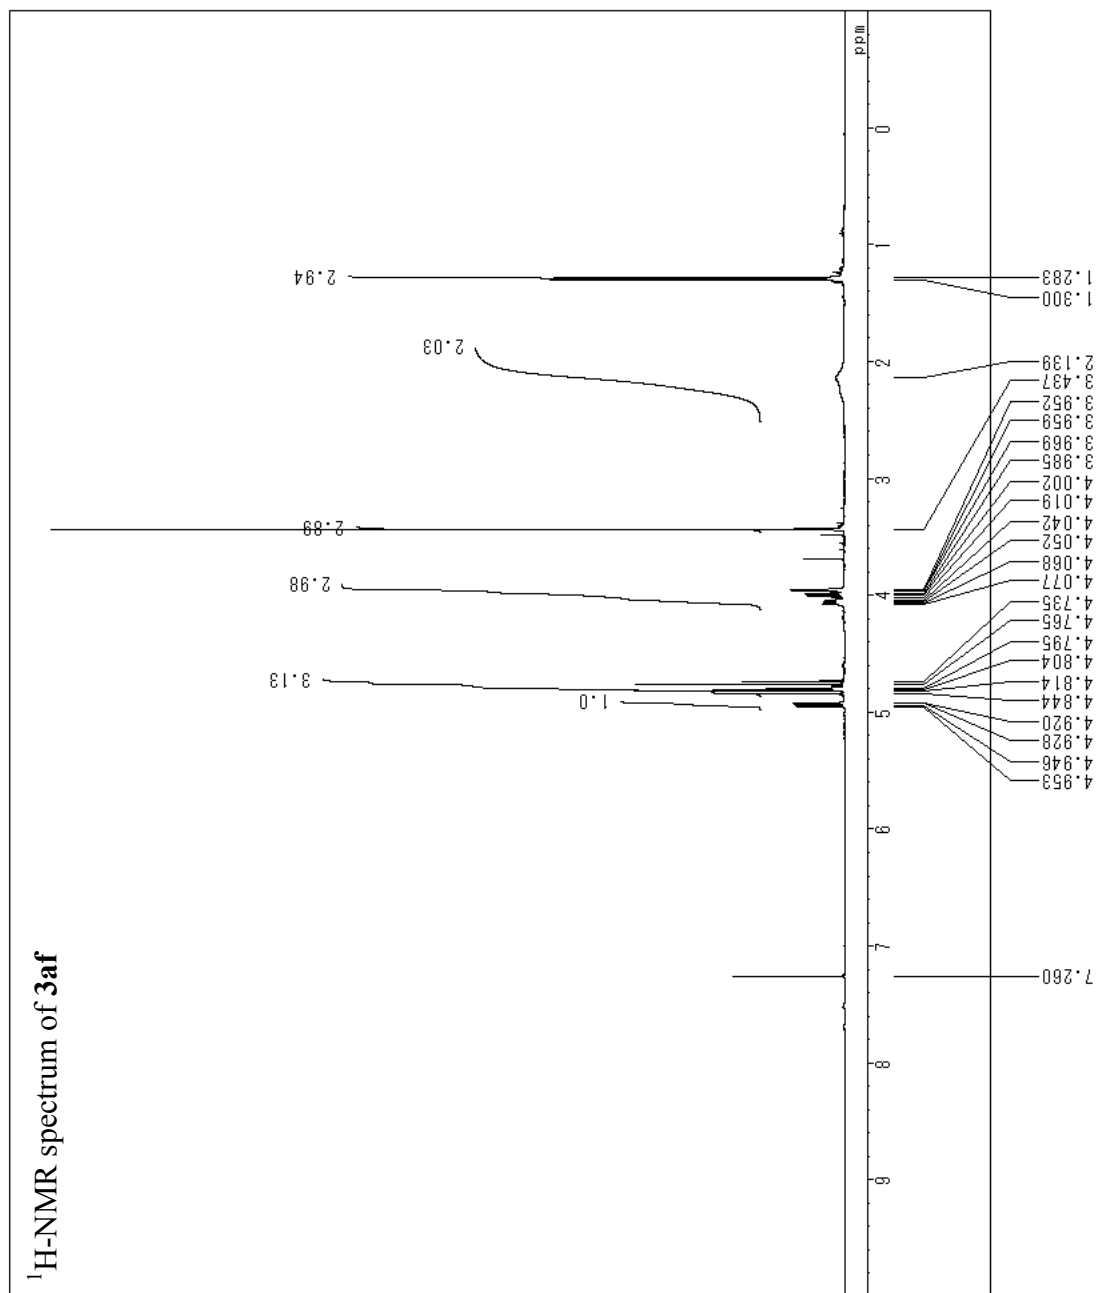

<sup>1</sup>H COSY spectrum of **3af**

COc1ccc(O)cc1O

**3af**

ppm (<sup>1</sup>H)

ppm (<sup>1</sup>H)

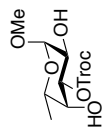

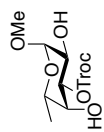

3af

Comment TSV19018\_pure\_13C\_COSY\_2  
 0171018\_01  
 Date 2017/Oct/18  
 ObsNuc <sup>13</sup>C  
 ExMode CARBON\_001  
 ObsFreq 100.45 MHz  
 Scan 512  
 AcqTime 1.3831 s  
 Acc. Interval 3.3831 s  
 Spinning 20.0 Hz  
 Temperature 25.0 °C  
 Solvent cdcl<sub>3</sub>

# <sup>13</sup>C-NMR spectrum of 3af

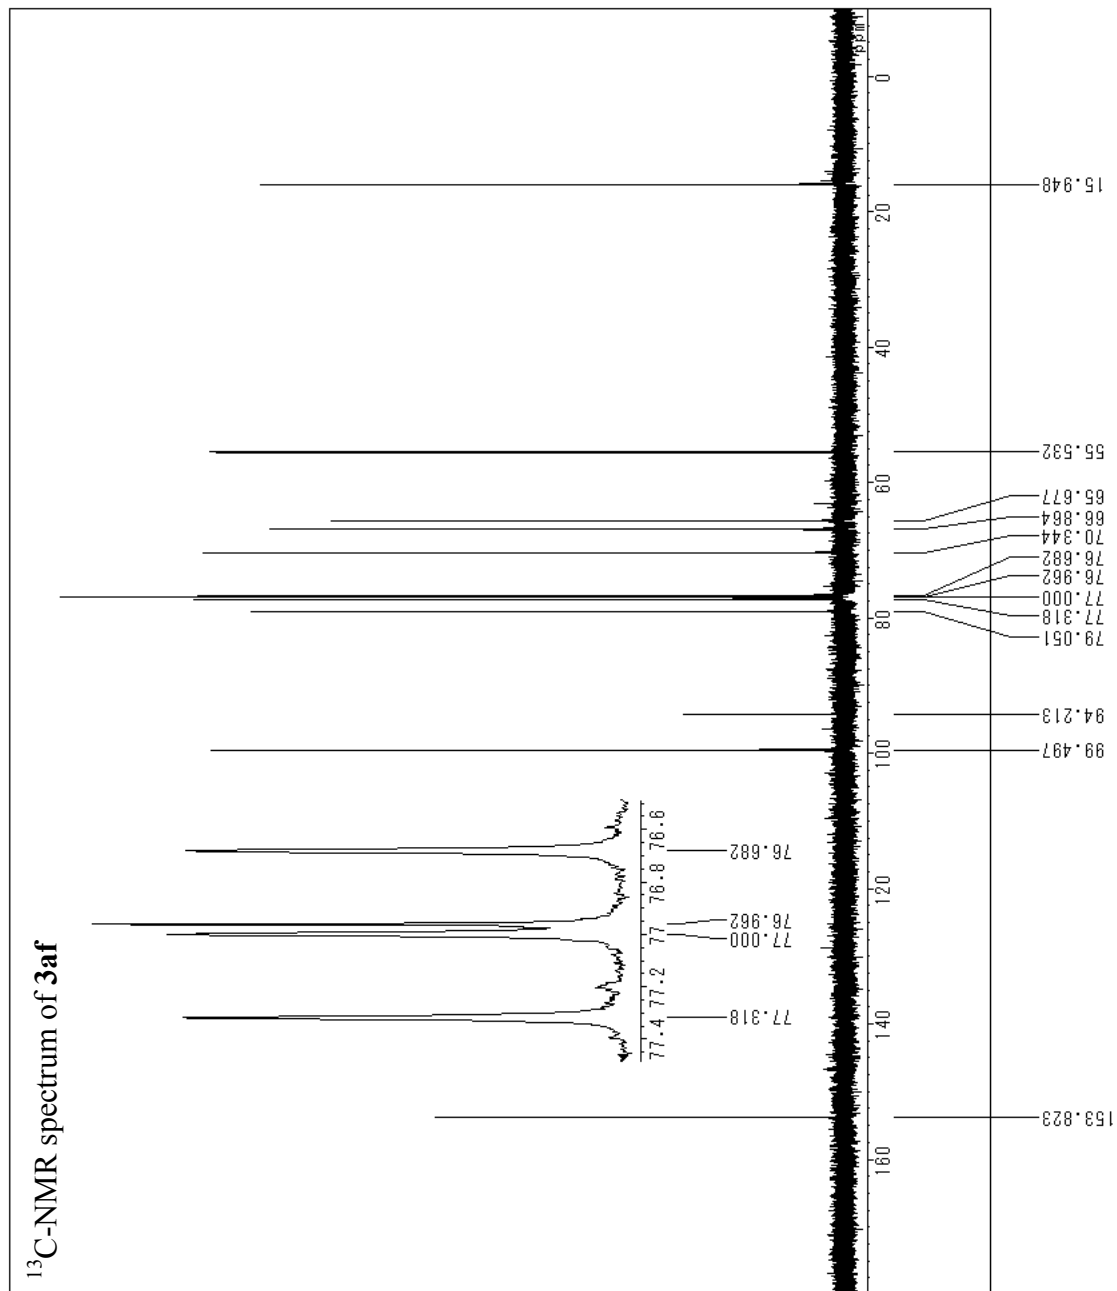

Methyl 3-*O*-allyloxycarbonyl- $\alpha$ -L-fucopyranoside (**3ag**)

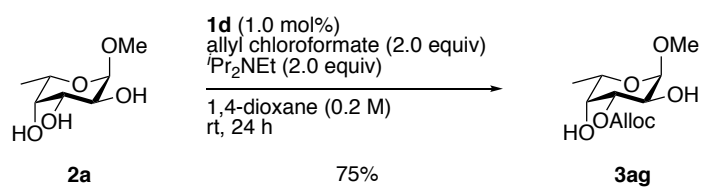

$^1\text{H}$ -NMR spectrum (crude reaction mixture in the presence of catalyst **1d**)

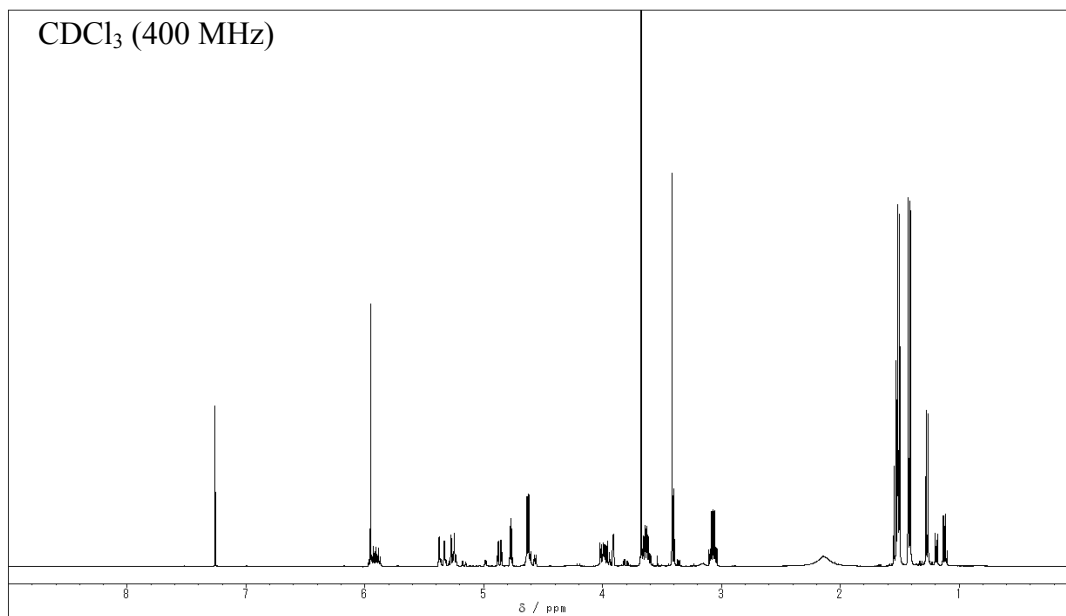

$^1\text{H}$ -NMR spectrum (crude reaction mixture in the absence of catalyst **1d**)

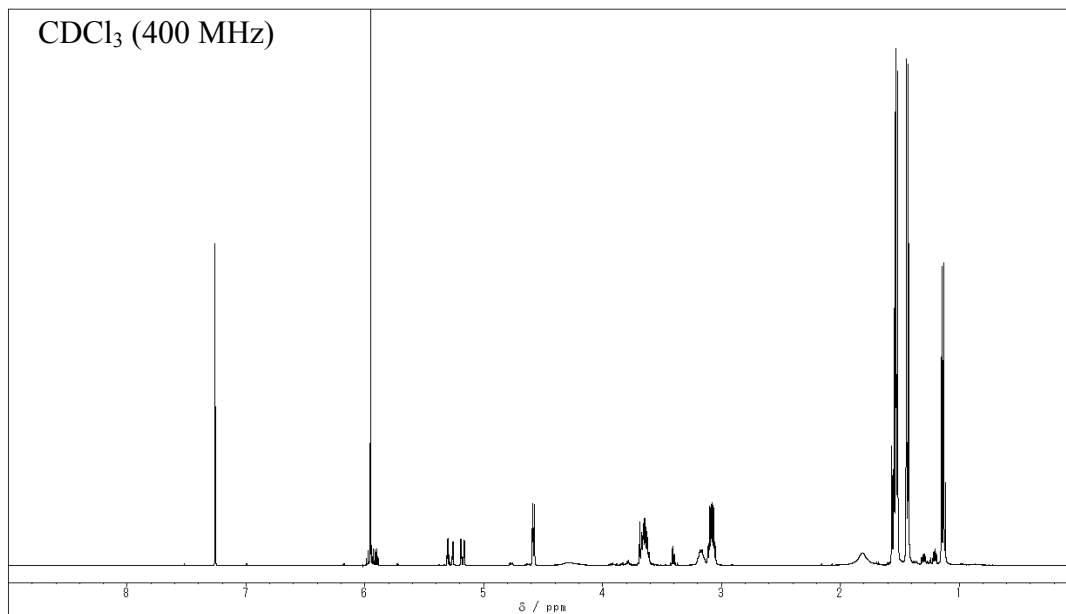

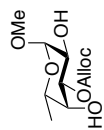

**3ag**

Comment TSV19016\_pure\_13C\_COSY\_2  
 0171018\_01  
 Date 2017/Oct/18  
 ObsNuc <sup>1</sup>H  
 ExMode PROTON\_001  
 ObsFreq 399.45 MHz  
 Scan 8  
 AcqTime 2.589 s  
 Acc. Interval 5.589 s  
 Spinning 18.0 Hz  
 Temperature 25.0 °C  
 Solvent cdcl<sub>3</sub>

<sup>1</sup>H-NMR spectrum of **3ag**

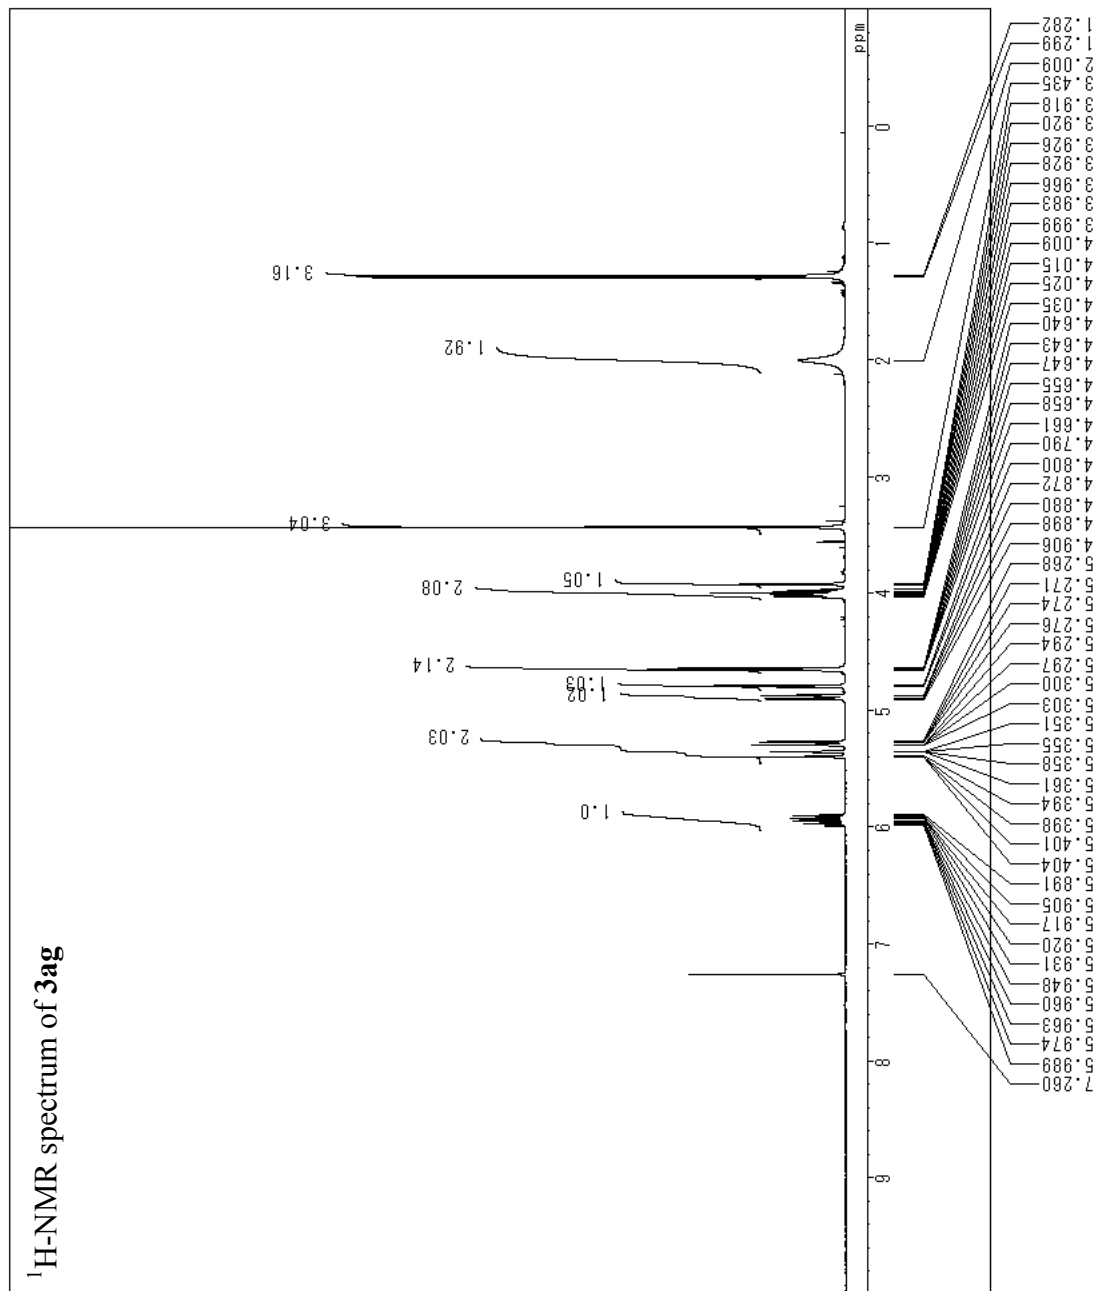

$^1\text{H}$ - $^1\text{H}$  COSY spectrum of **3ag**

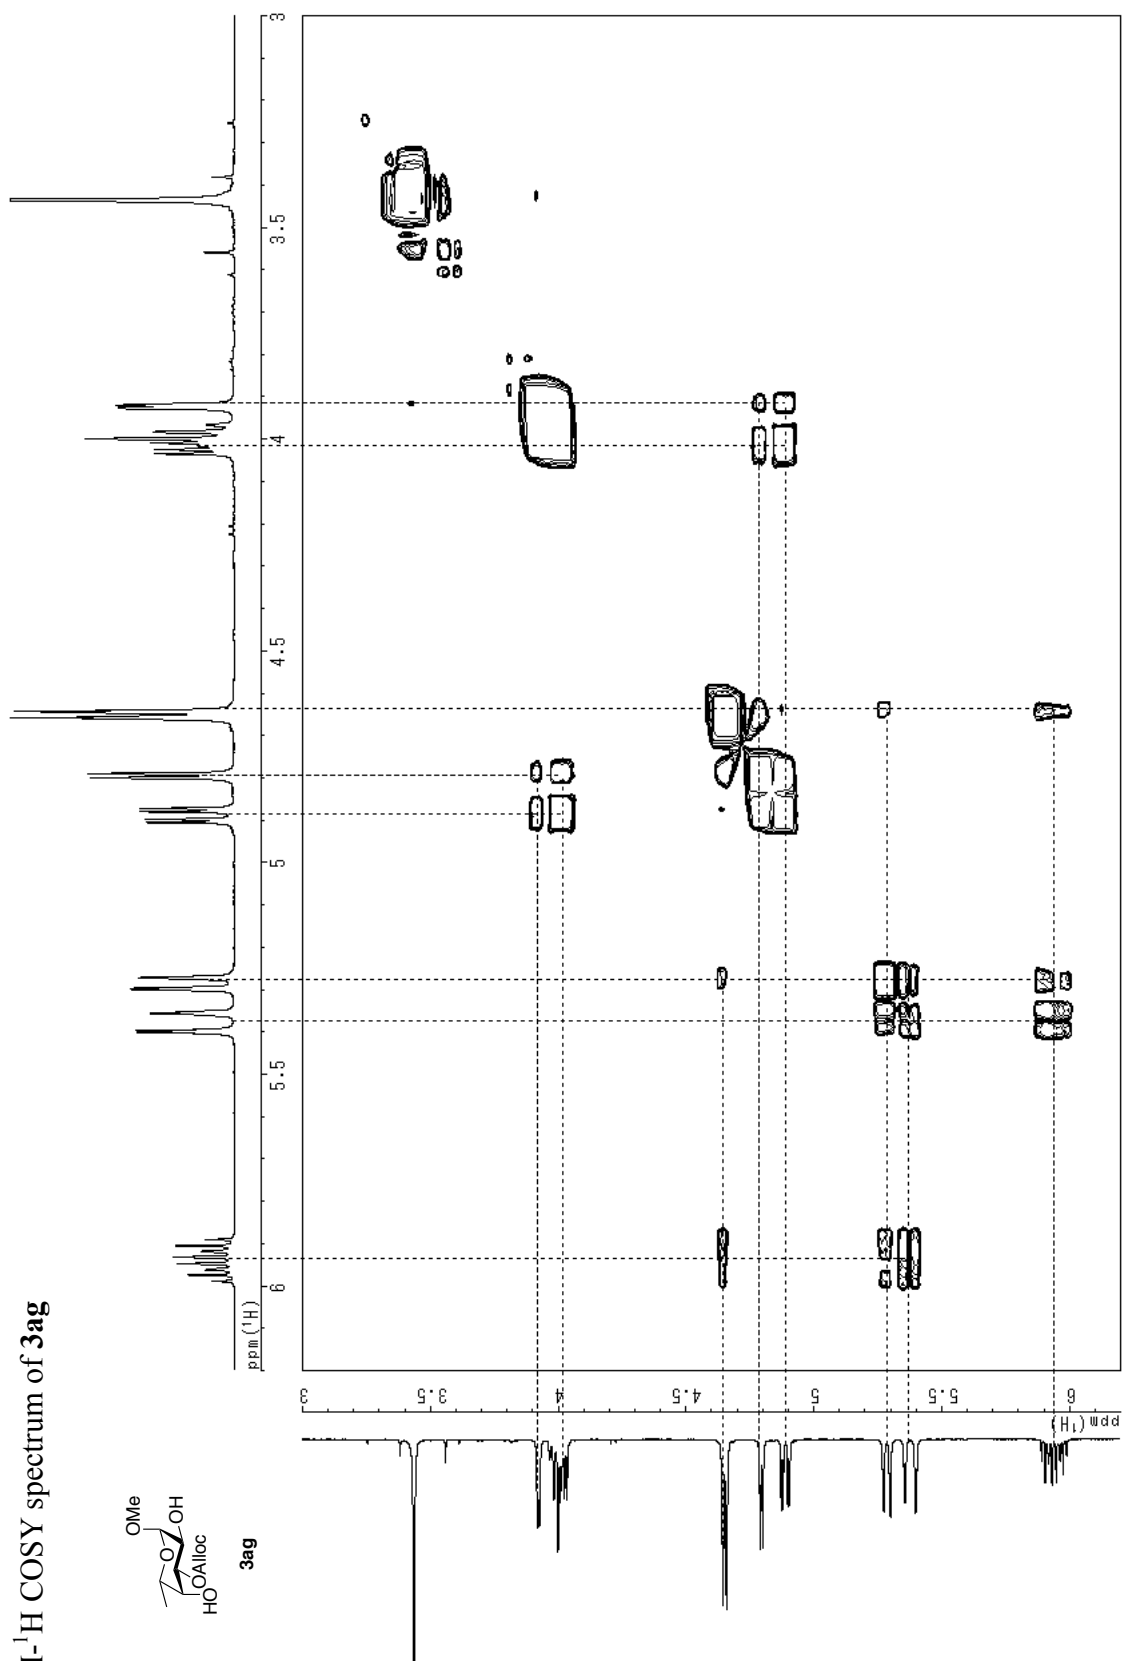

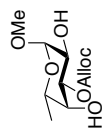

**3ag**

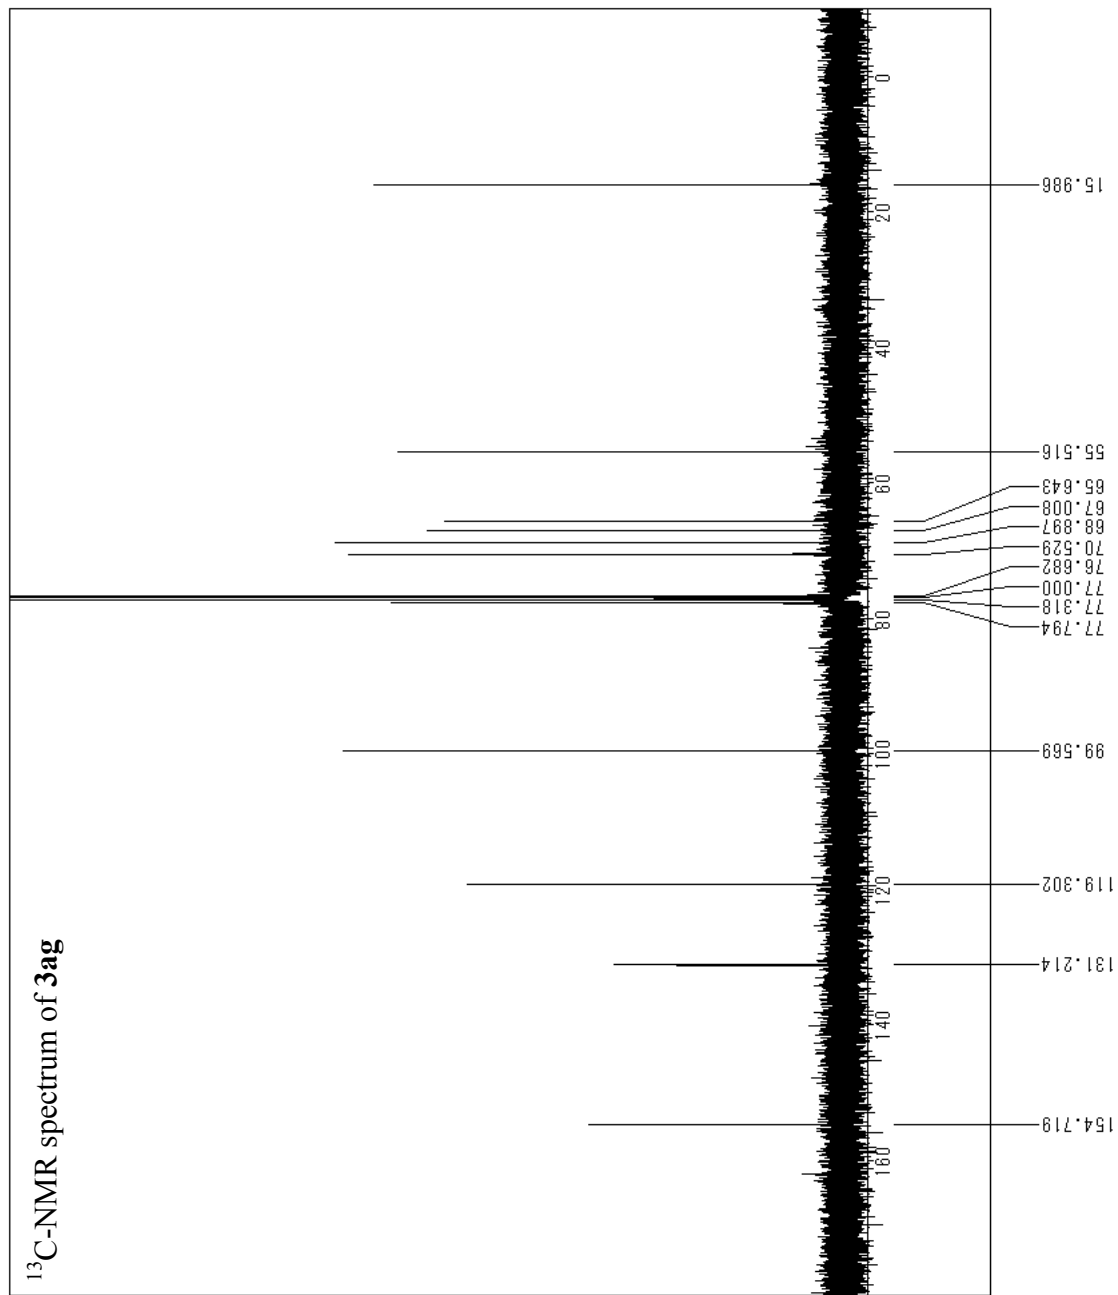

Comment TSV19016\_pure\_13C\_COSY\_2  
 0171018\_01  
 Date 2017/Oct/18  
 ObsNuc <sup>13</sup>C  
 ExMode CARBON\_001  
 ObsFreq 100.45 MHz  
 Scan 512  
 AcqTime 1.3631 s  
 Acc. Interval 3.3631 s  
 Spinning 20.0 Hz  
 Temperature 25.0 °C  
 Solvent cdcl<sub>3</sub>



Methyl 3-*O*-9-fluorenylmethyloxycarbonyl- $\alpha$ -L-fucopyranoside (**3ah**)

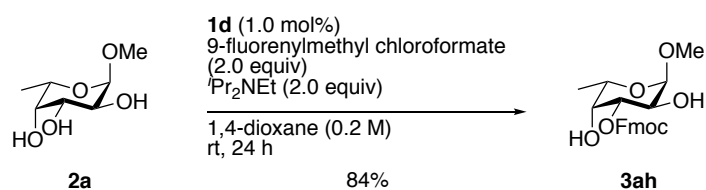

$^1\text{H}$ -NMR spectrum (crude reaction mixture in the presence of catalyst **1d**)

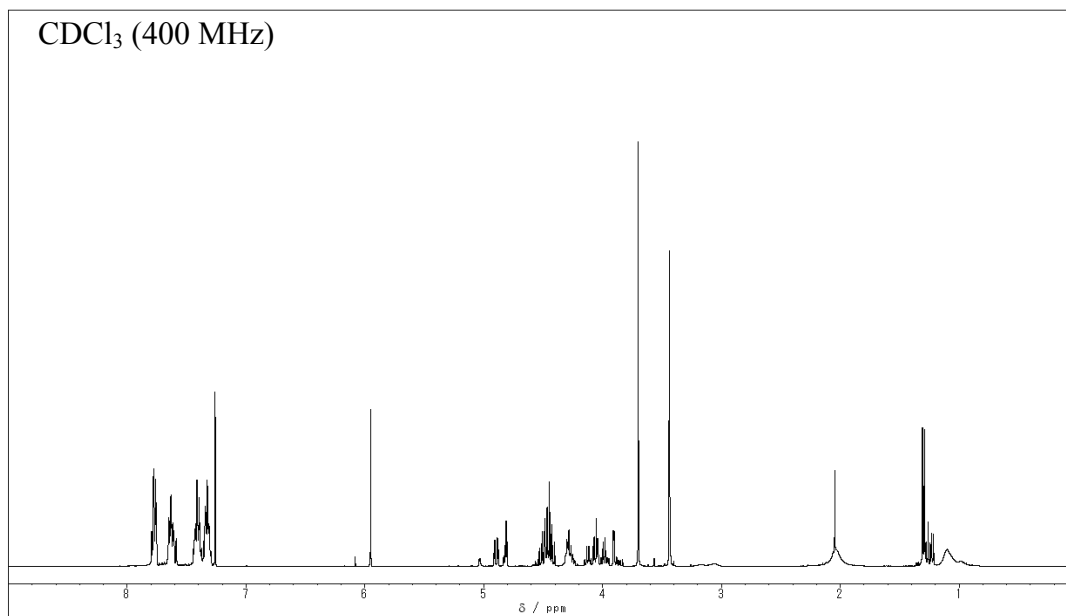

$^1\text{H}$ -NMR spectrum (crude reaction mixture in the absence of catalyst **1d**)

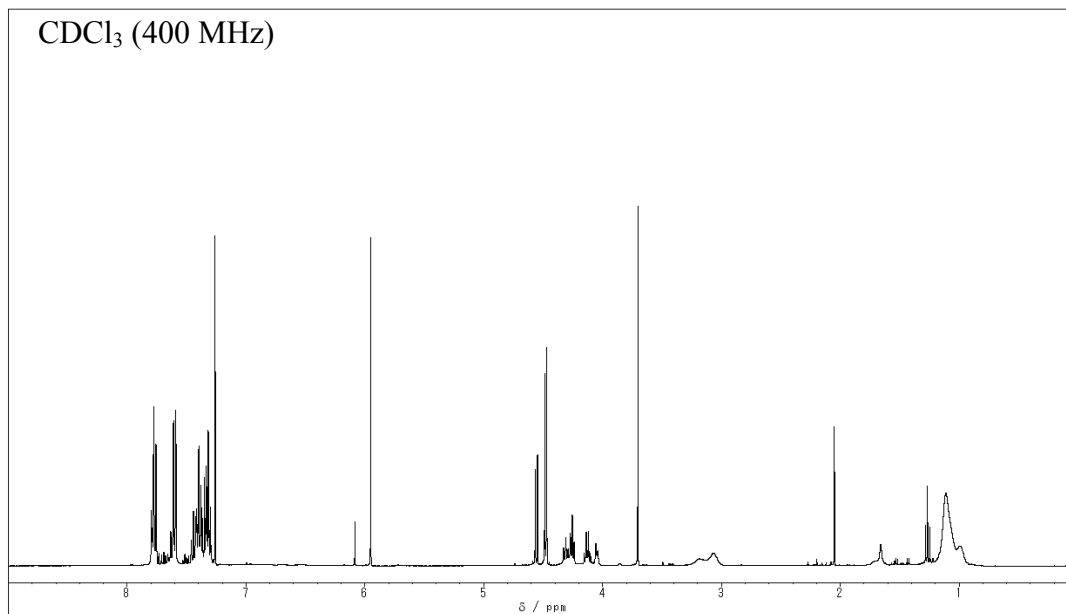

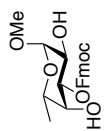

|               |                          |
|---------------|--------------------------|
| Comment       | TSV18014_pure_13C_COSY_2 |
| Date          | 01/7/2005_01             |
| Date          | 2017/0ct/05              |
| ObsNuc        | <sup>1</sup> H           |
| ObsProg       | PROTON_001               |
| ExMode        | 8                        |
| ObsFreq       | 399.45 MHz               |
| Scan          | 8                        |
| AcqTime       | 2.569 s                  |
| Acq. Interval | 5.569 s                  |
| Spinning      | 16.0 Hz                  |
| Temperature   | 25.0 °C                  |
| Solvent       | cdcl <sub>3</sub>        |

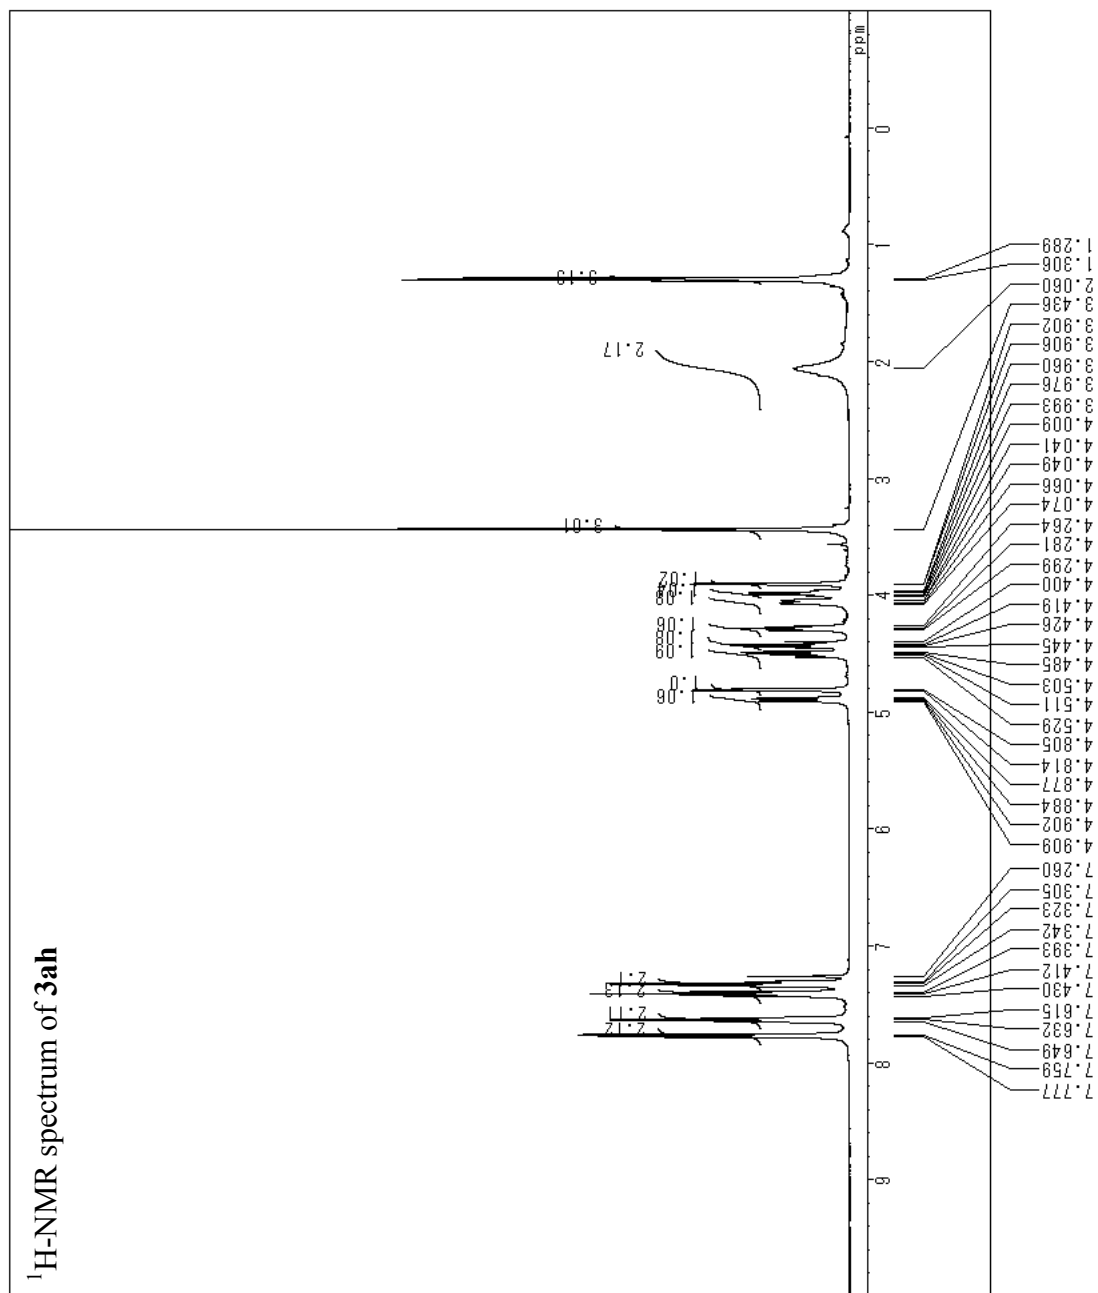

$^1\text{H}$ - $^1\text{H}$  COSY spectrum of **3ah**

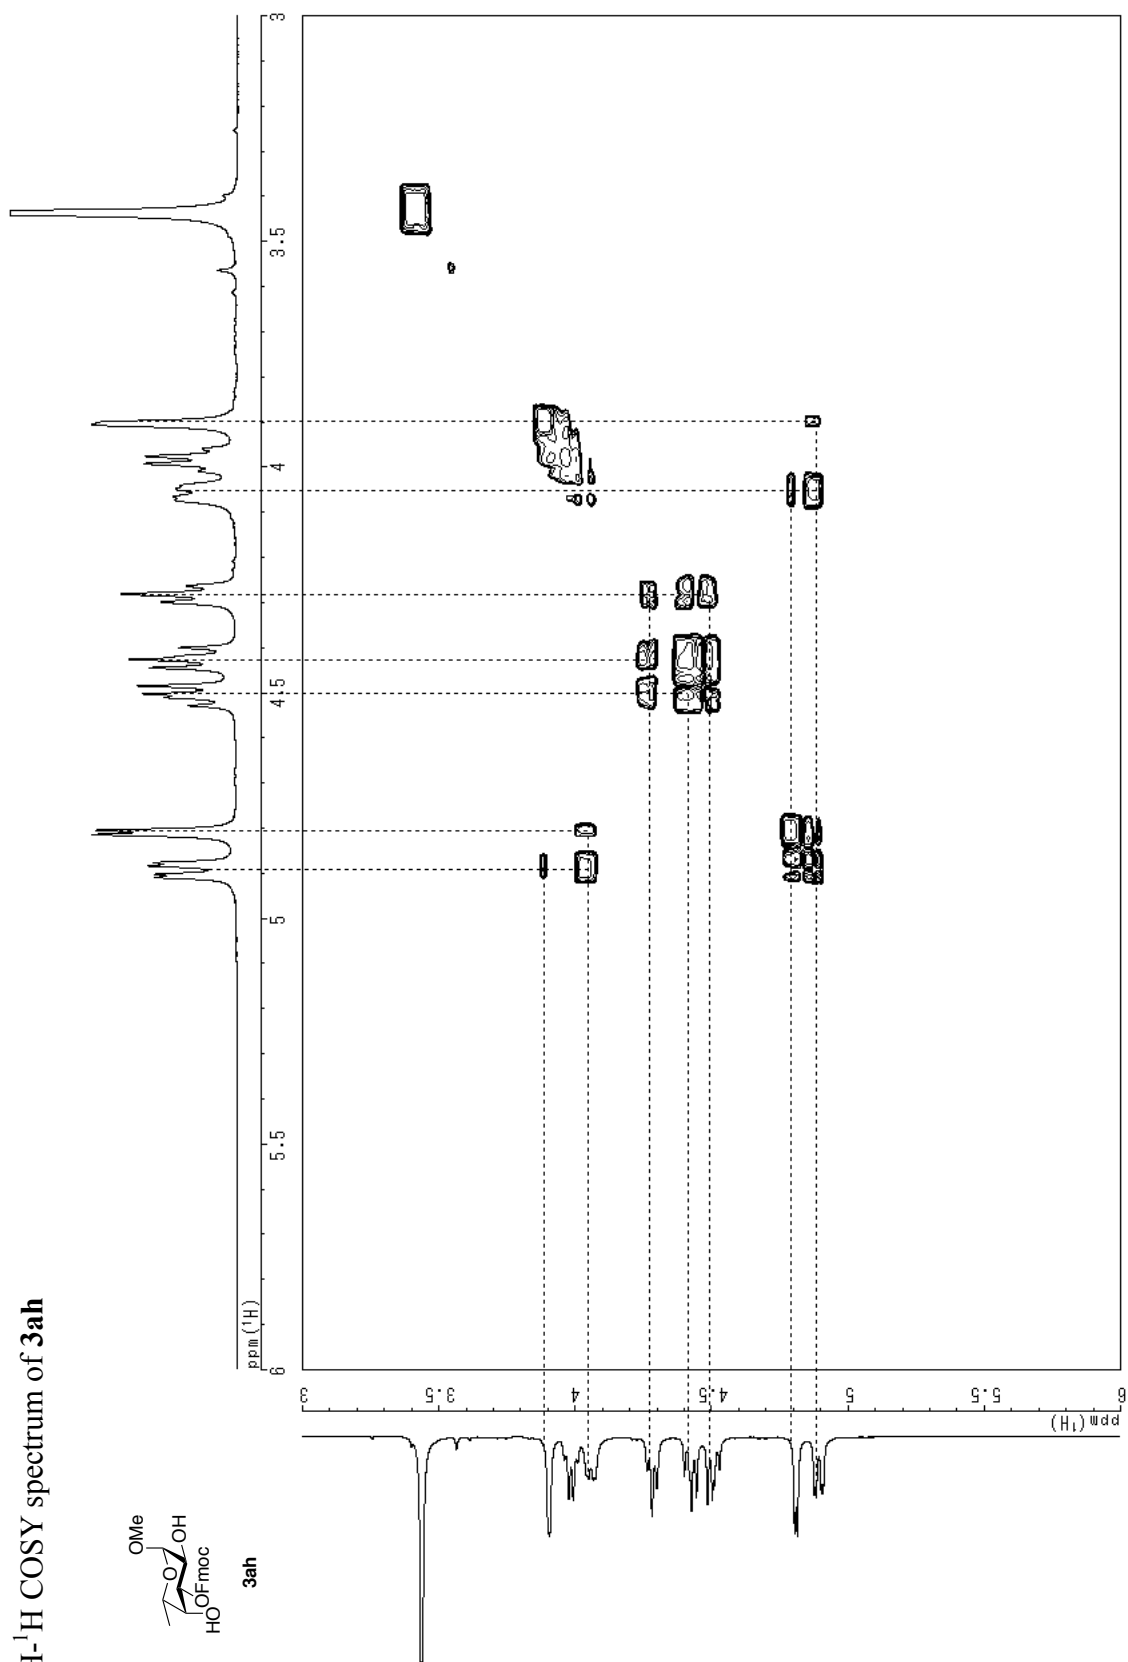

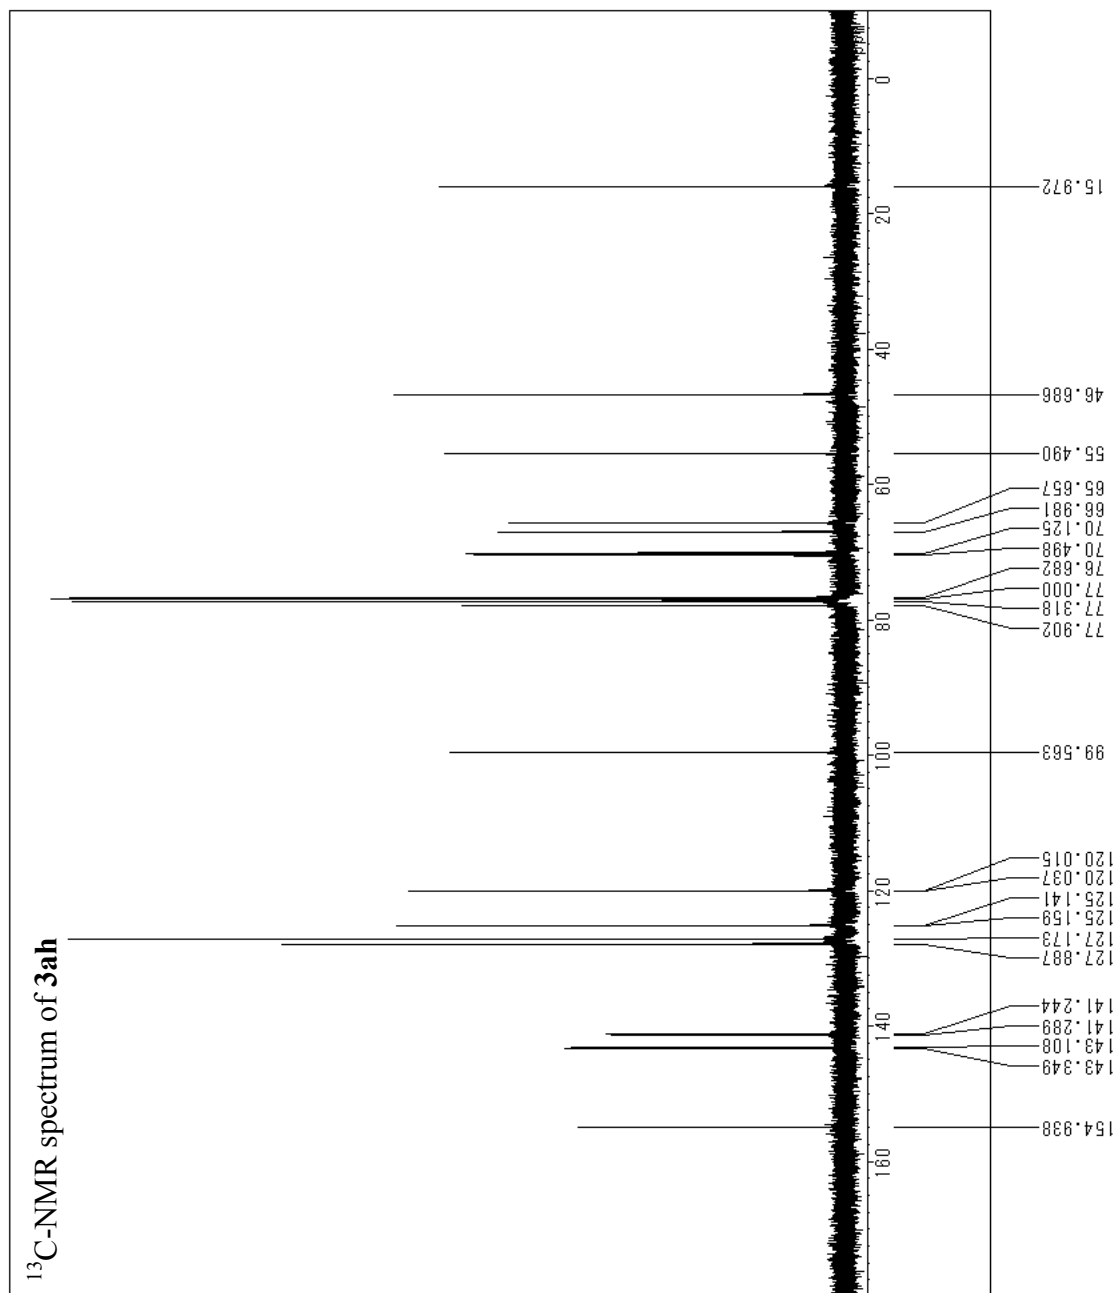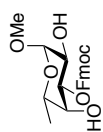

**3ah**

Comment TSV18014\_pure\_13C\_COSY\_2  
 0171005\_01  
 Date 2017/Oct/05  
 ObsNuc <sup>13</sup>C  
 ExMode CARBON\_001  
 ObsFreq 100.45 MHz  
 Scan 512  
 AcqTime 1.3831 s  
 Acc. Interval 3.3831 s  
 Spinning 20.0 Hz  
 Temperature 25.0 °C  
 Solvent cdcl<sub>3</sub>

Methyl 3,6-*O*-dibenzoyl- $\alpha$ -D-mannopyranoside (**3ai**)

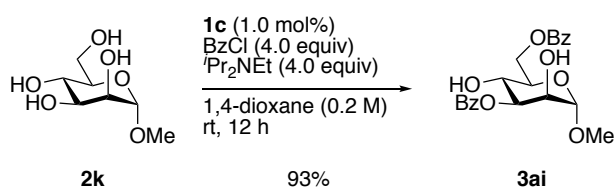

$^1\text{H}$ -NMR spectrum (crude reaction mixture in the presence of catalyst **1c**)

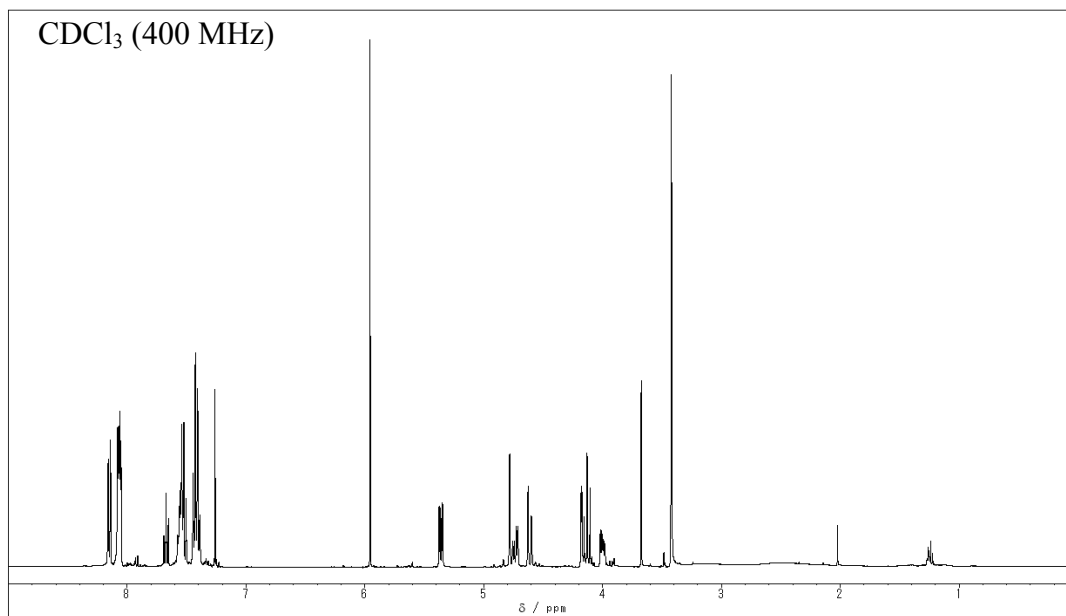

$^1\text{H}$ -NMR spectrum (crude reaction mixture in the absence of catalyst **1c**)

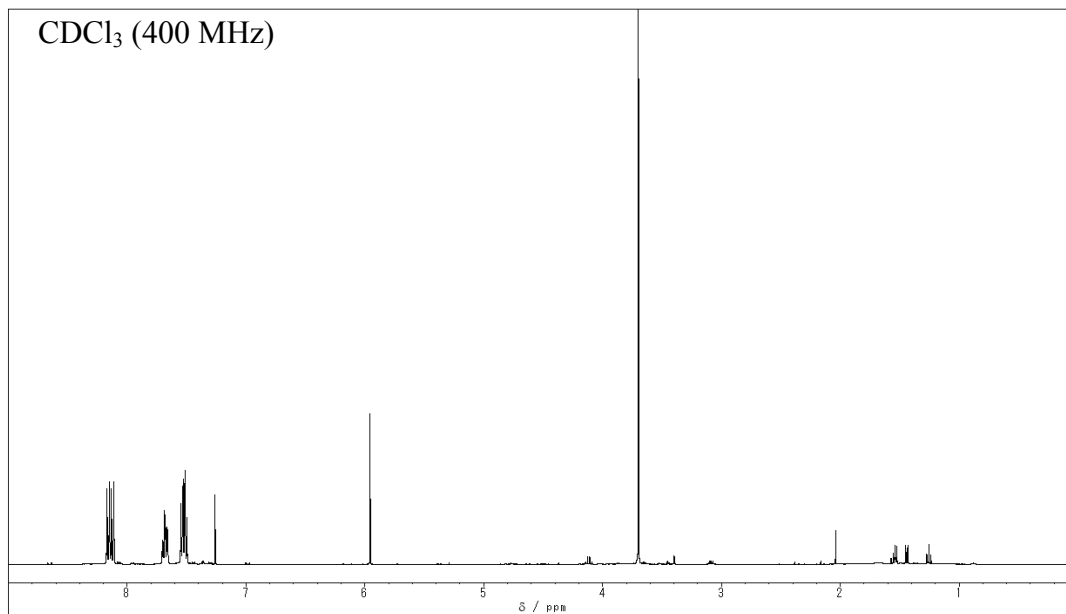

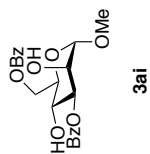

<sup>1</sup>H-NMR spectrum of 3ai

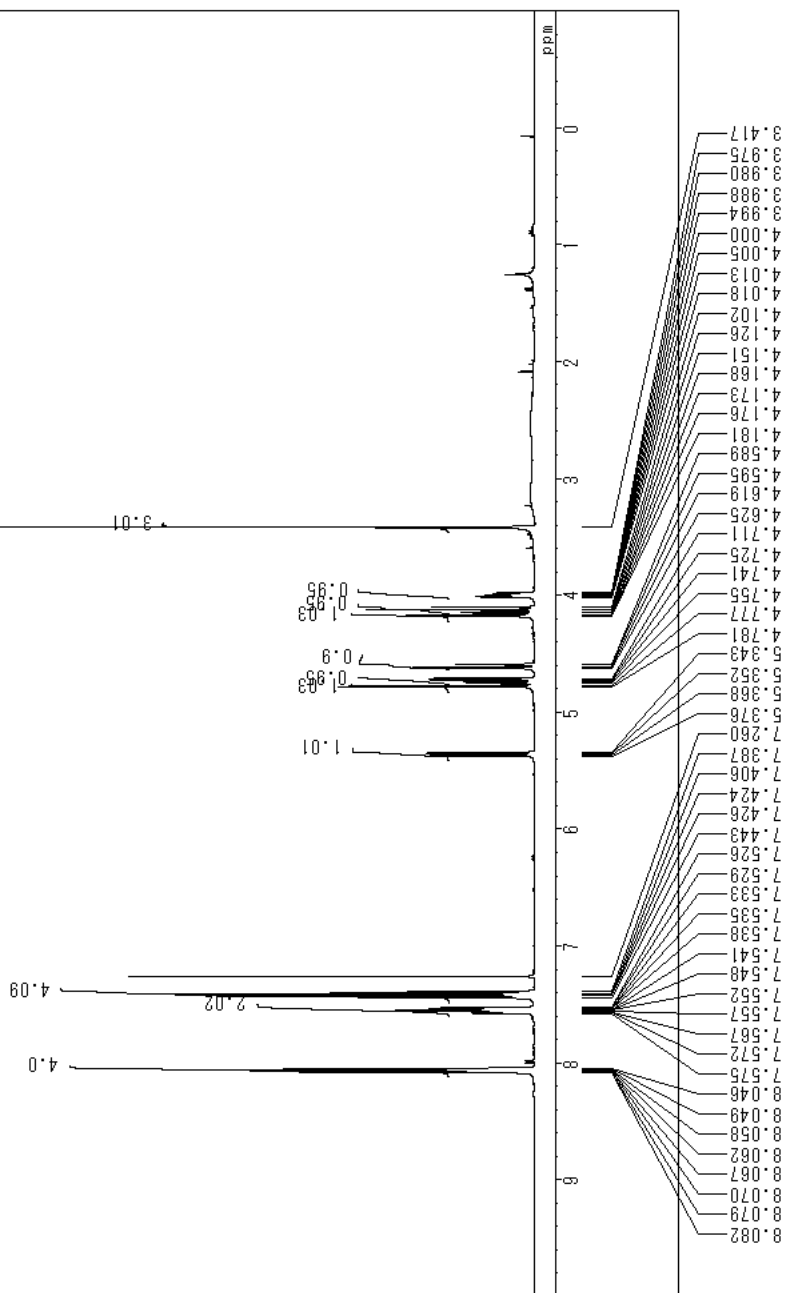

Comment TSV05018\_column\_2\_201803  
 Date 07\_01 2018/Mar/07  
 ObsNuc <sup>1</sup>H  
 ExMode PROTON\_001  
 ObsFreq 399.45 MHz  
 Scan 32  
 AcqTime 2.589 s  
 Acc. Interval 5.589 s  
 Spinning 18.0 Hz  
 Temperature 25.0 °C  
 Solvent cdcl<sub>3</sub>

$^1\text{H}$ - $^1\text{H}$  COSY spectrum of **3ai**

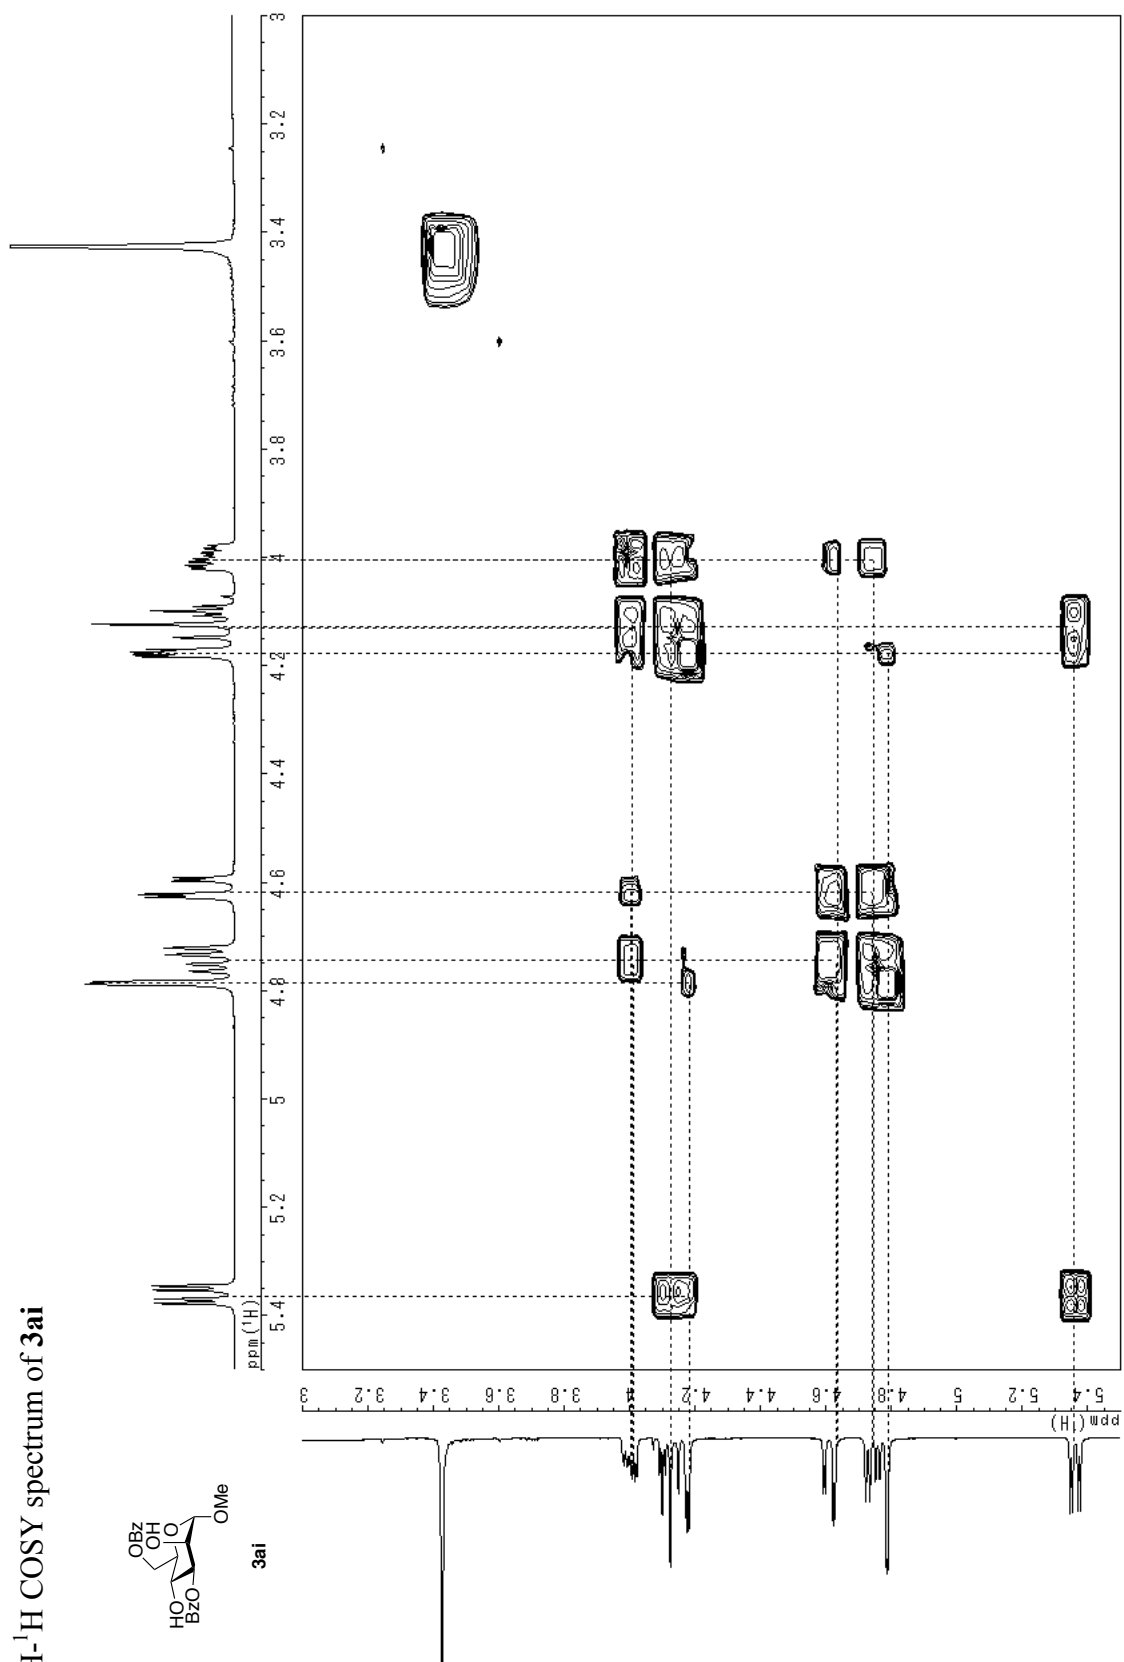

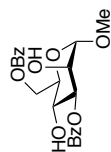

**3ai**

Comment TSV05018\_13C\_20180308\_01  
 Date 2018/Mar/08  
 ObsNuc <sup>13</sup>C  
 ExMode CARBON\_001  
 ObsFreq 100.45 MHz  
 Scan 512  
 AcqTime 1.3831 s  
 Acc. Interval 3.3831 s  
 Spinning 20.0 Hz  
 Temperature 25.0 °C  
 Solvent cdcl<sub>3</sub>

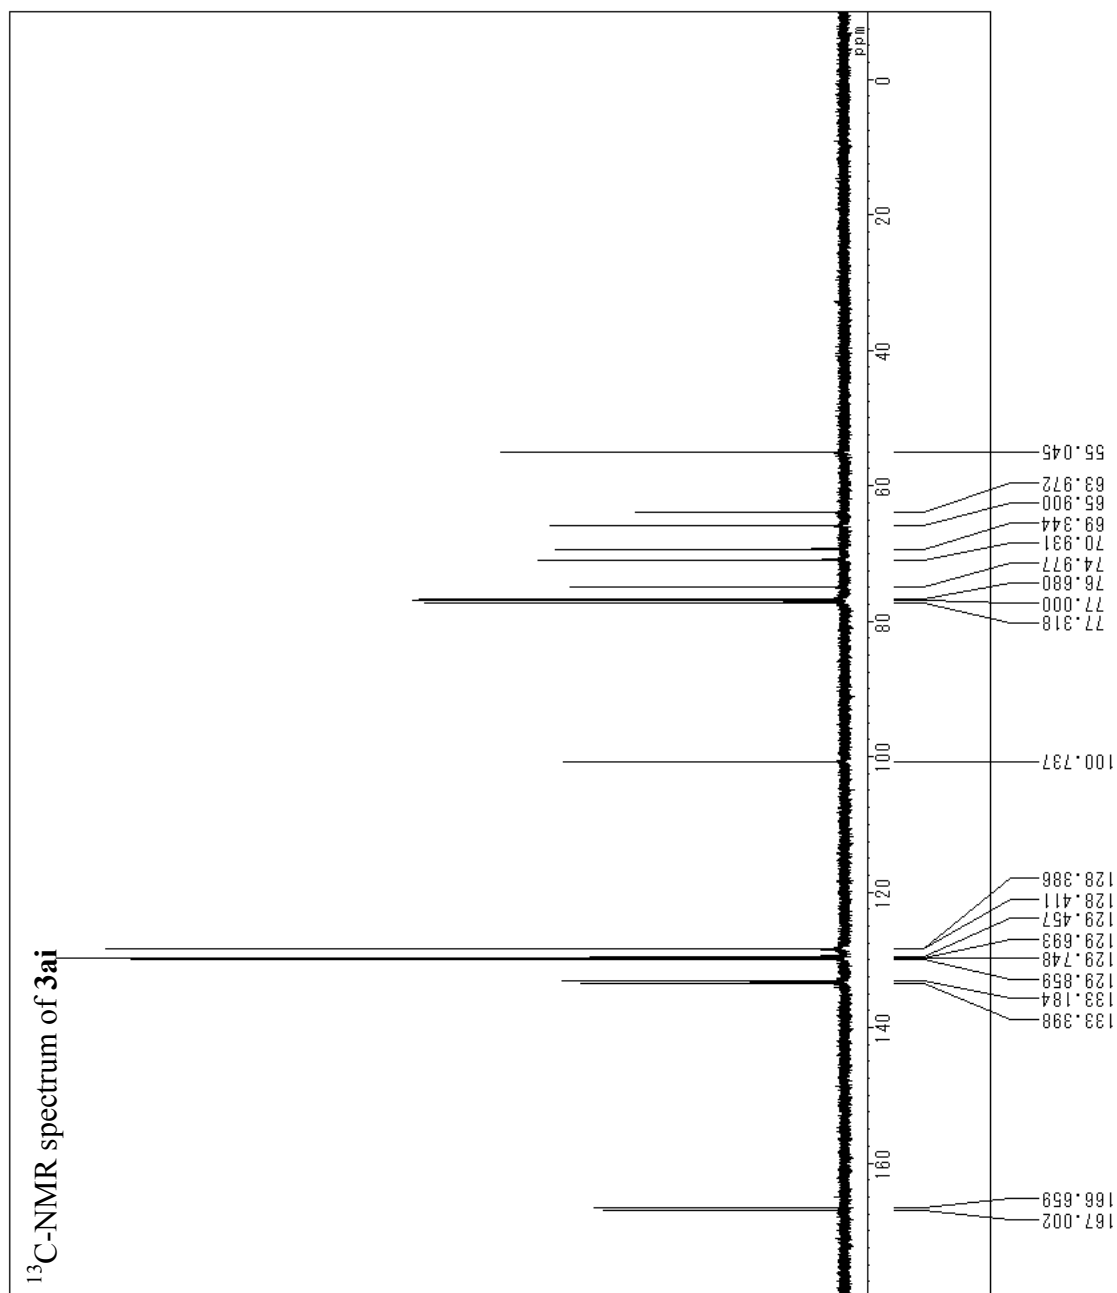



Methyl 3,6-*O*-dibenzoyl- $\beta$ -D-galactopyranoside (**3aj**)

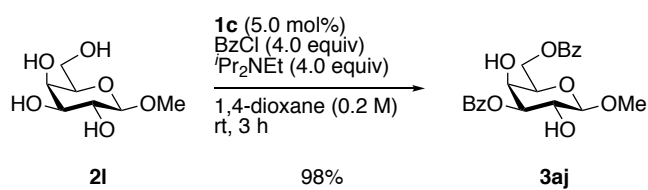

$^1\text{H}$ -NMR spectrum (crude reaction mixture in the presence of catalyst **1c**)

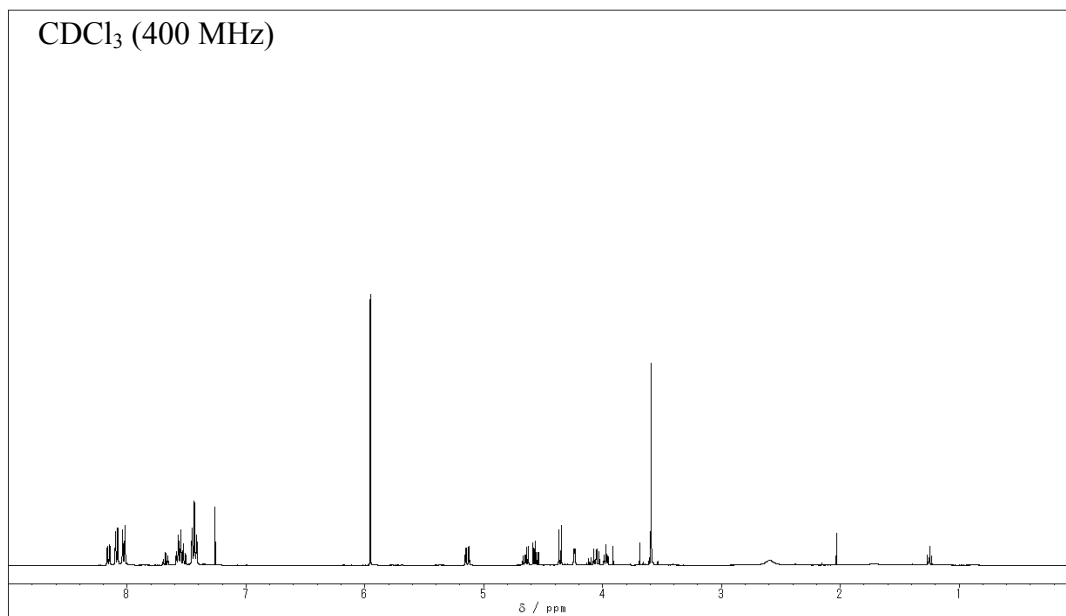

$^1\text{H}$ -NMR spectrum (crude reaction mixture in the absence of catalyst **1c**)

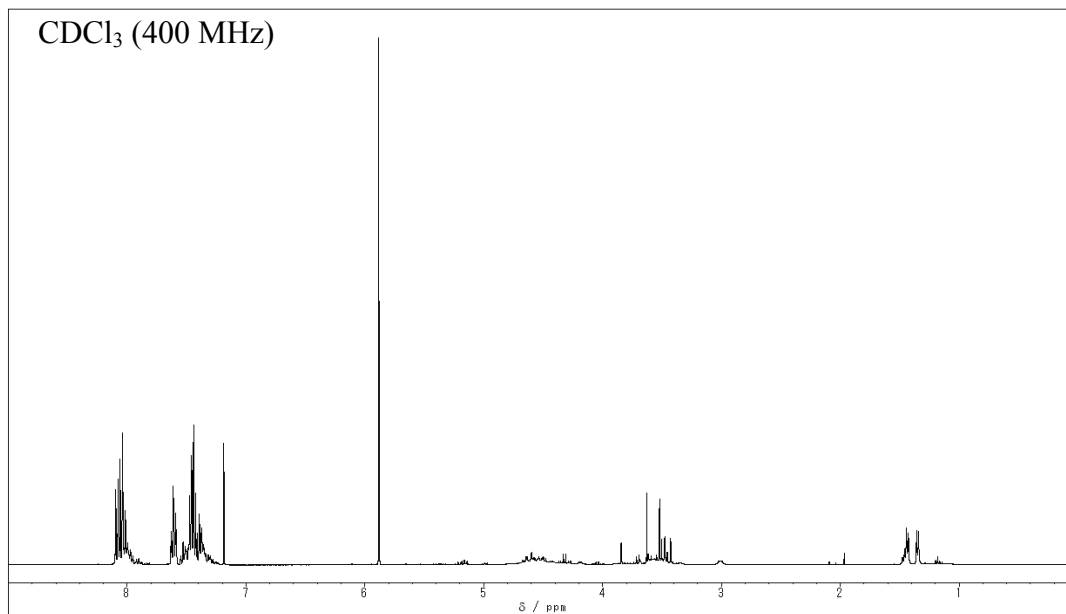

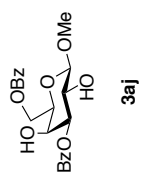

<sup>1</sup>H-NMR spectrum of **3aj**

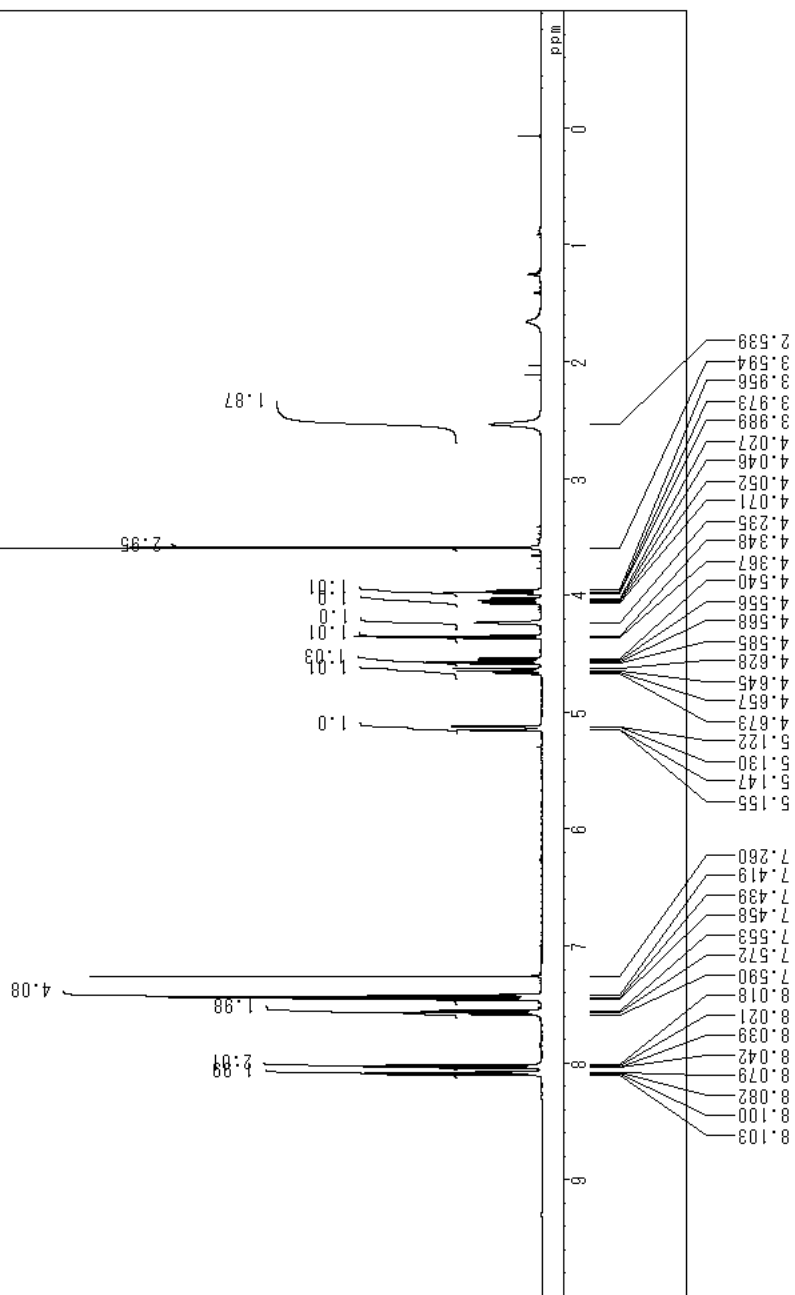

Comment TSV05023\_column\_20180318  
 Date\_01 2018/Mar/18  
 ObsNuc <sup>1</sup>H  
 ExMode PROTON\_001  
 ObsFreq 300.45 MHz  
 Scan 32  
 AcqTime 2.589 s  
 Acc. Interval 5.589 s  
 Spinning 18.0 Hz  
 Temperature 25.0 °C  
 Solvent cdcl<sub>3</sub>

$^1\text{H}$ - $^1\text{H}$  COSY spectrum of **3aj**

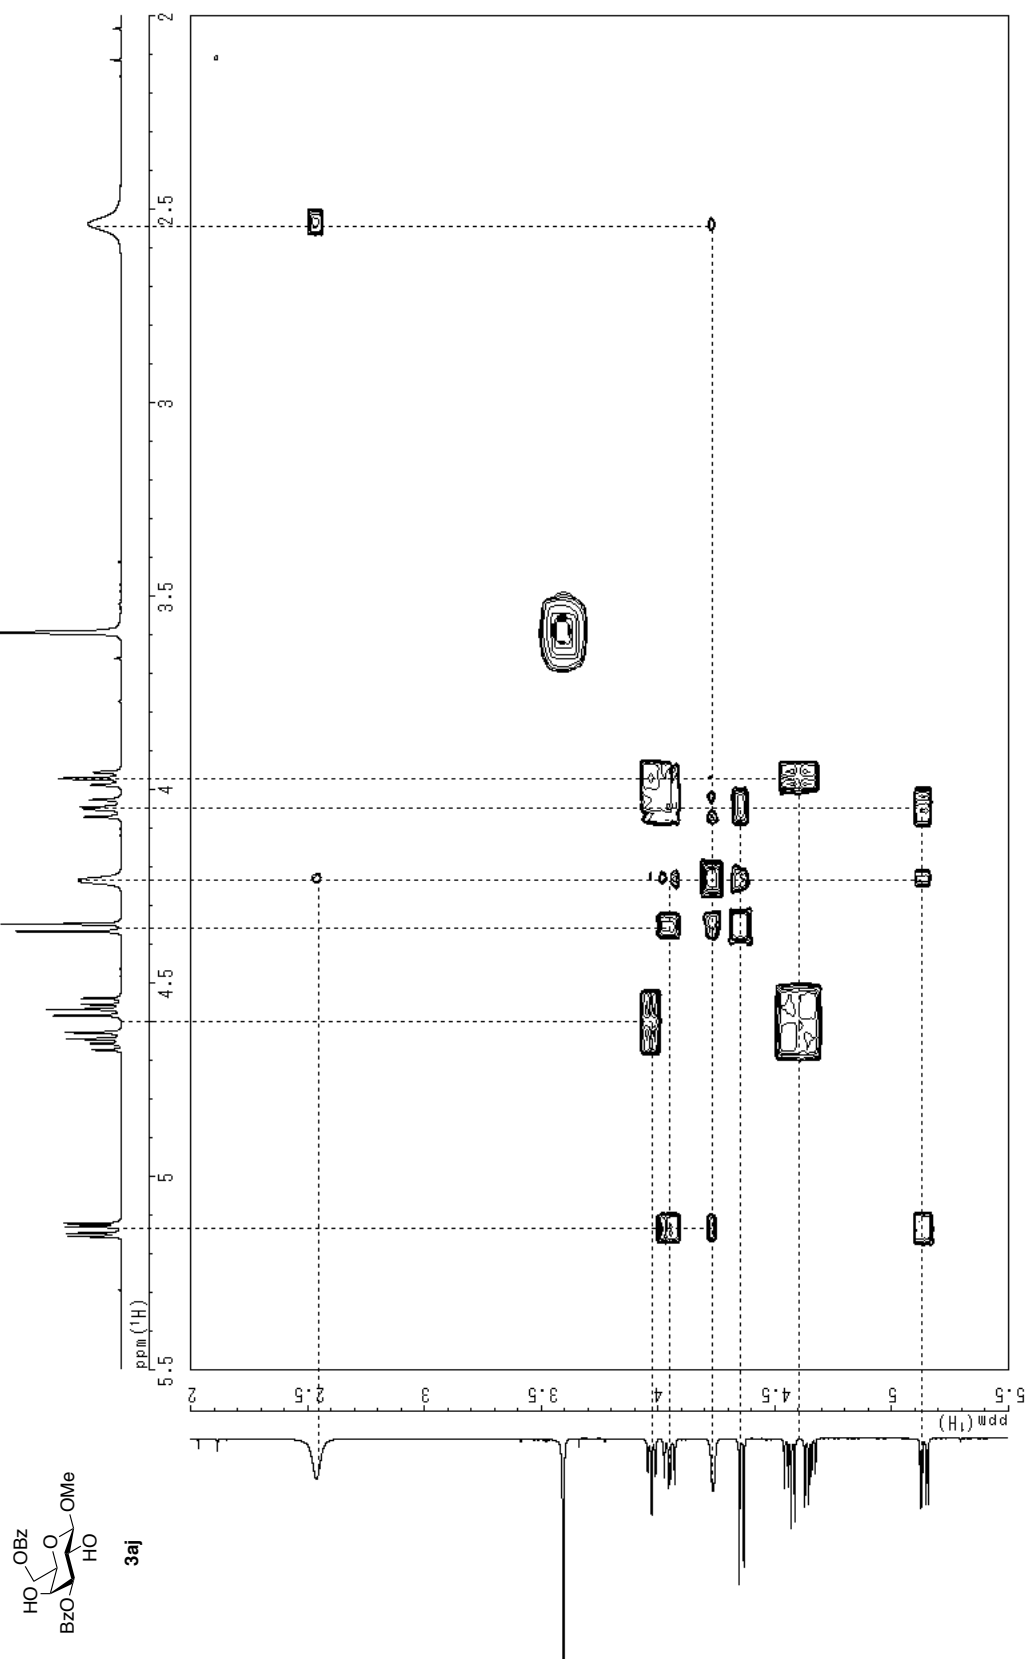

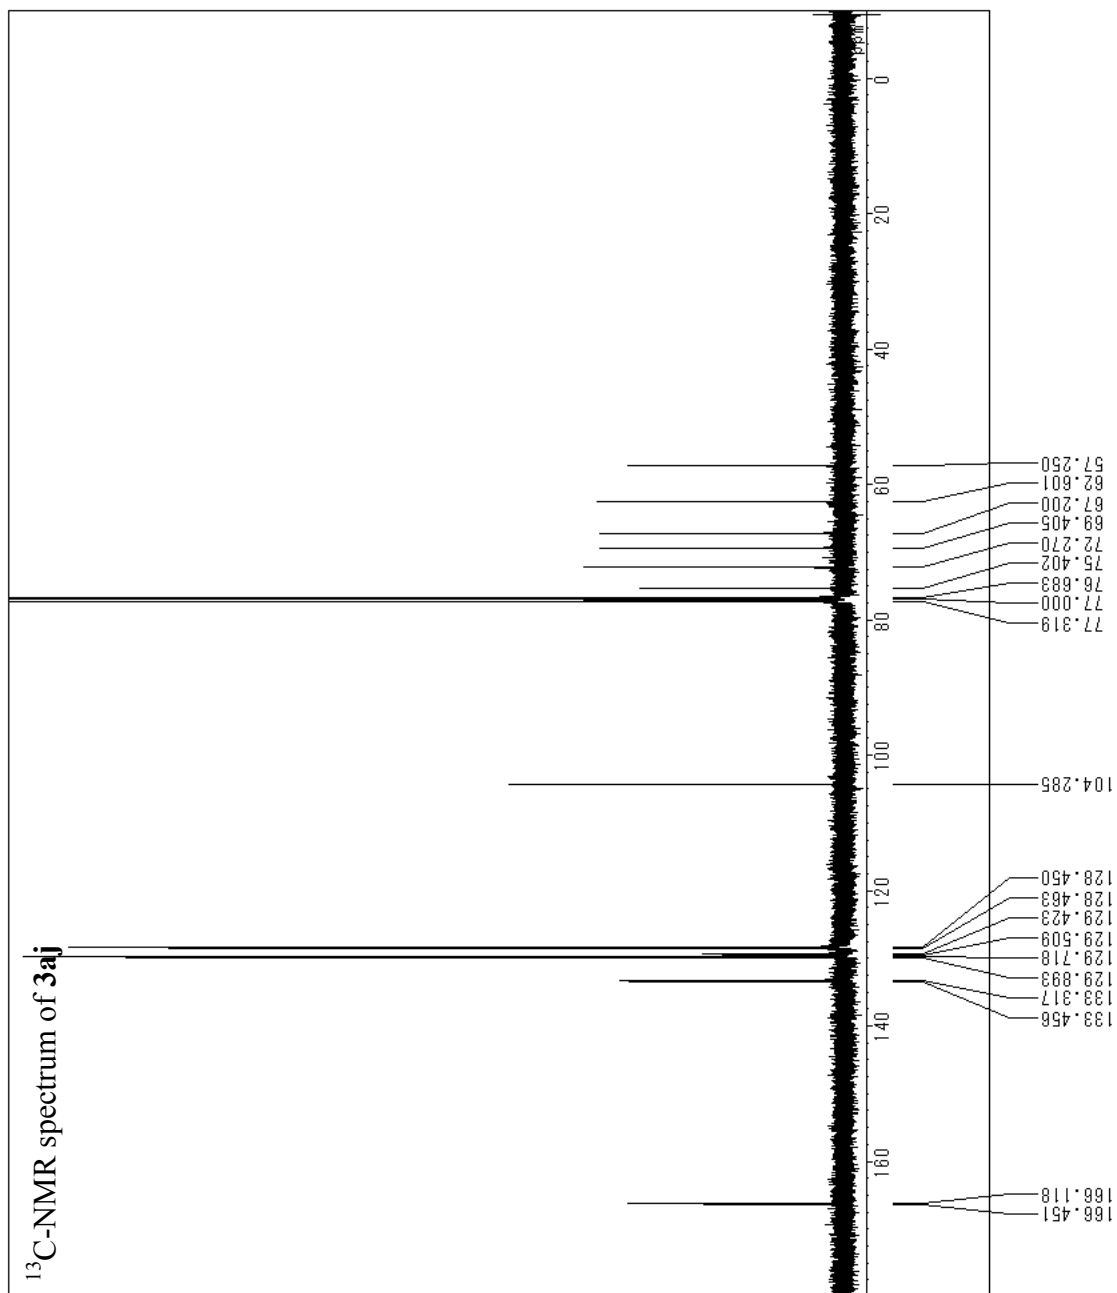

Comment TSV05023\_13C\_20180316\_01  
 Date 2016/Mar/16  
 ObsNuc <sup>13</sup>C  
 ExMode CARBON\_001  
 ObsFreq 100.66 MHz  
 Scan 512  
 AcqTime 1.3831 s  
 Acc. Interval 3.3831 s  
 Spinning 20.0 Hz  
 Temperature 25.0 °C  
 Solvent cdcl<sub>3</sub>

## 12. References

- (1) Coghlan, S. W.; Giles, R. L.; Howard, J. A. K.; Patrick, L. G. F.; Probert, M. R.; Smith, G. E.; Whiting, A. Synthesis and structure of potential Lewis acid–Lewis base bifunctional catalysts: 2-*N,N*-diisopropylaminophenylboronate derivatives. *J. Organomet. Chem.* **2005**, *690*, 4784–4793.
- (2) Ishihara, K.; Sakakura, A. Process for producing carboxylic anhydride, and arylboronic acid compound. WO 2010/103976 A1.
- (3) Dimitrijević, E.; Taylor, M. S. 9-Hetero-10- boraanthracene-derived borinic acid catalysts for regioselective activation of polyols. *Chem. Sci.* **2013**, *4*, 3298–3303.
- (4) Sakakura, A.; Yamashita, R.; Ohkubo, T.; Akakura, M.; Ishihara, K. Intramolecular dehydrative condensation of dicarboxylic acids with Brønsted base-assisted boronic acid catalysts. *Aust. J. Chem.* **2011**, *64*, 1458–1465.
- (5) Ishihara, M.; Togo, H. An efficient preparation of 2-imidazolines and imidazoles from aldehydes with molecular iodine and (diacetoxyiodo)benzene. *Synlett*, **2006**, 227–230.
- (6) Lee, D.; Taylor, M. S. Borinic acid-catalyzed regioselective acylation of carbohydrate derivatives. *J. Am. Chem. Soc.* **2011**, *133*, 3724–3727.
